# Supplementary material for: Anti-inflammatory role of curcumin in Lipopolysaccharide treated A549 cells at global proteome level and on mycobacterial infection
Source: bioRxiv or medRxiv preprint supplement (doi:10.1101/721100), 2020-02-25
Supplement: Supplementary file [file media-1.pdf]

**Anti-inflammatory Role of Curcumin in LPS Treated A549 cells at Global Proteome level and on Mycobacterial infection.**

Suchita Singh<sup>1,+</sup>, Rakesh Arya<sup>2,3,+</sup>, Rhishikesh R Bargaje<sup>1</sup>, Mrinal Kumar Das<sup>2,4</sup>, Subia Akram<sup>2</sup>, Hossain Md. Faruquee<sup>2,5</sup>, Rajendra Kumar Behera<sup>3</sup>, Ranjan Kumar Nanda<sup>2,\*</sup>, Anurag Agrawal<sup>1</sup>

<sup>1</sup>Center of Excellence for Translational Research in Asthma and Lung Disease, CSIR-Institute of Genomics and Integrative Biology, New Delhi, 110025, India.

<sup>2</sup>Translational Health Group, International Centre for Genetic Engineering and Biotechnology, New Delhi, 110067, India.

<sup>3</sup>School of Life Sciences, Sambalpur University, Jyoti Vihar, Sambalpur, Orissa, 768019, India.

<sup>4</sup>Department of Respiratory Sciences, #211, Maurice Shock Building, University of Leicester, LE1 9HN

<sup>5</sup>Department of Biotechnology and Genetic Engineering, Islamic University, Kushtia-7003, Bangladesh.

<sup>+</sup>Contributed equally for this work.

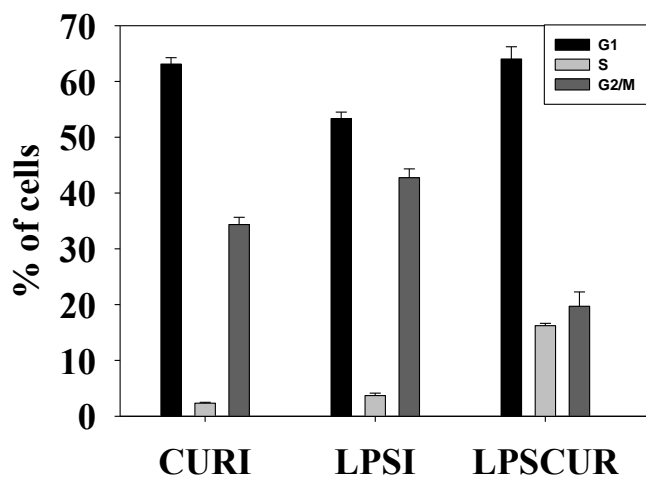

**Figure S1: Effect of curcumin and/or LPS treatment on A549 cell viability** A549 cells were treated with curcumin (10  $\mu$ M) and/or LPS or 1  $\mu$ g/ml for the indicated times and after fixation were stained with propidium iodide and Annexin V-FITC. The DNA contents were determined by flow cytometry to calculate percentage of cells present in each phase of the cell cycle (G1, S and G2/M) using Flowing analysis software.

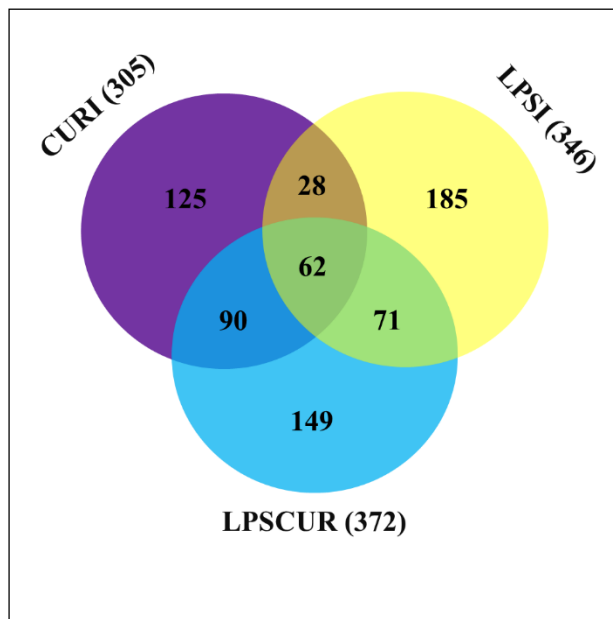

**Figure S2: Total proteins identified in all the three experiments and their distribution between curcumin and/or LPS treated conditions.** The proteins showing differential expressions ( $\log_2$  fold change  $\geq 2$ ) in these experiments were presented in the venn diagram and certain number of proteins are common in all three experiments.

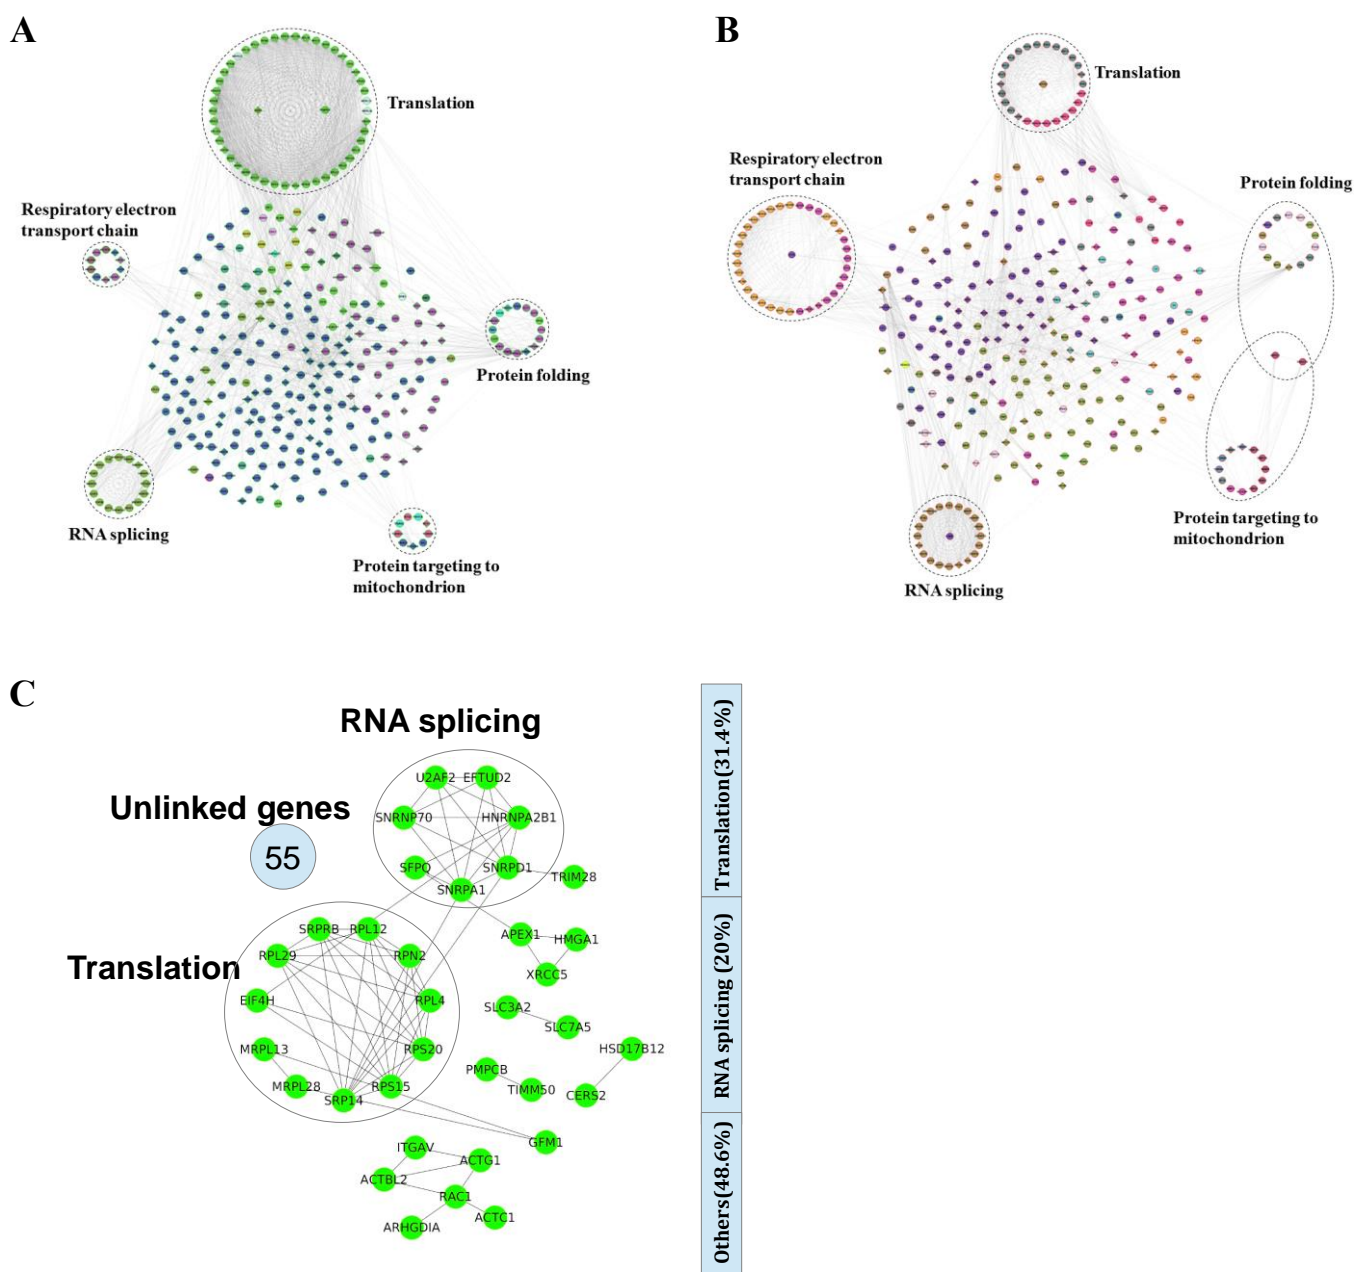

**Figure S3: Treatment of the A549 cells with curcumin and LPS show altered biological activity.** Subnetwork in (A) curcumin treated cells (out of 305 deregulated genes only 257 were mapped to the database with 75 linker genes) and (B) LPs treated cells (out of 346 deregulated genes only 265 were mapped to the database with 65 linker genes). Different colors shows different modules in which the interaction of the genes are highest based on the modularity. The circled maps of the subnetworks involves different biological processes. Linker genes are shown by diamond shaped nodes. (C) Reactome FI network of 90 common deregulated genes/proteins between curcumin and LPS treated experiments. The important biological processes like translation and RNA splicing accounts for 31.4% and 20% respectively. About 48.4% of genes which are not linked to other genes may be involved in some other biological processes.

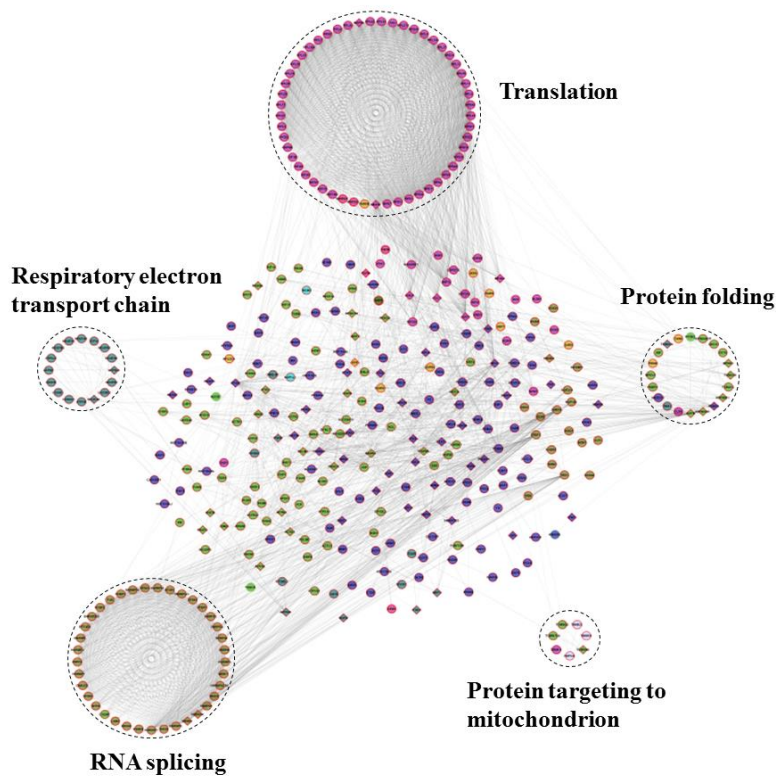

**Figure S4: Simultaneous treatment of A549 cells with curcumin and LPS and its effect on the biological pathways.** Subnetwork in LPSCUR (out of 372 deregulated genes only 317 were mapped to the database with 76 linker genes). Functional categorization and the distribution of LPSCUR differentially expressed proteins to extract the information of their known functions.

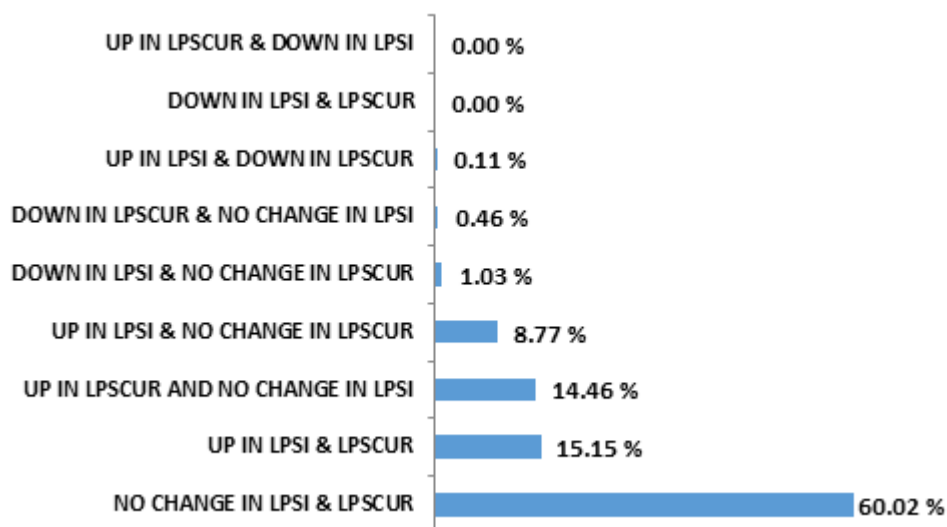

**Figure S5: Percentage distribution of the deregulated proteins in LPS treated and both LPS and curcumin treated cells.** A total of 878 proteins were common in these experiments. The proteins upregulated in LPS treated cells did not show change in both LPS and curcumin treated cells accounts for 8.77%. About 15.15% accounts for upregulation in both the experiments with 60% with no significant change in both experiments.

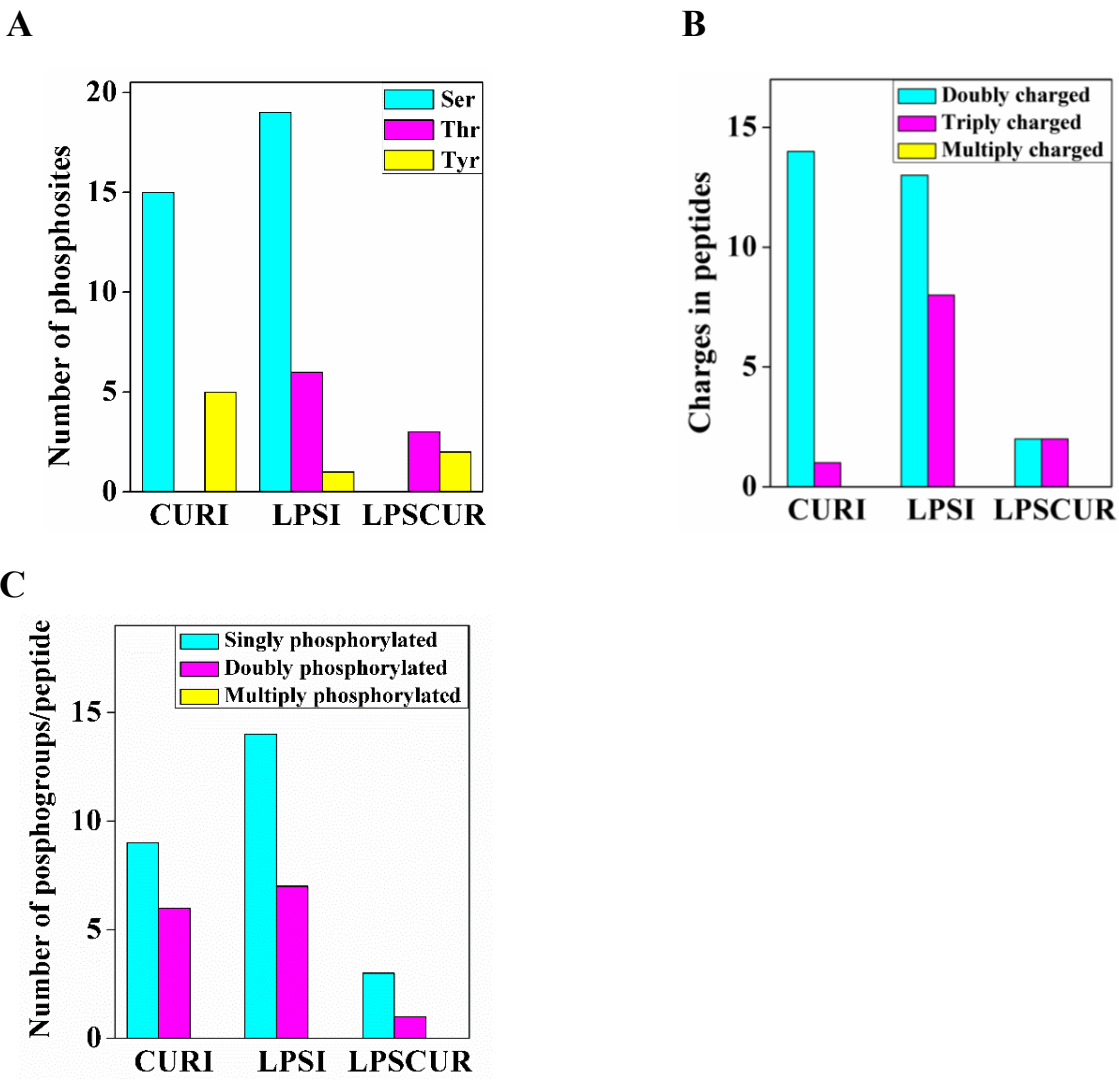

**Figure S6: Alteration in phosphoproteins in curcumin and/or LPS treated cells.** (A) Distribution of the phosphosite localization of class I identified phosphosites. (B) Distribution of the charges in peptides of phosphorylated proteins. (C) Distribution of no. of phosphogroups per peptide.

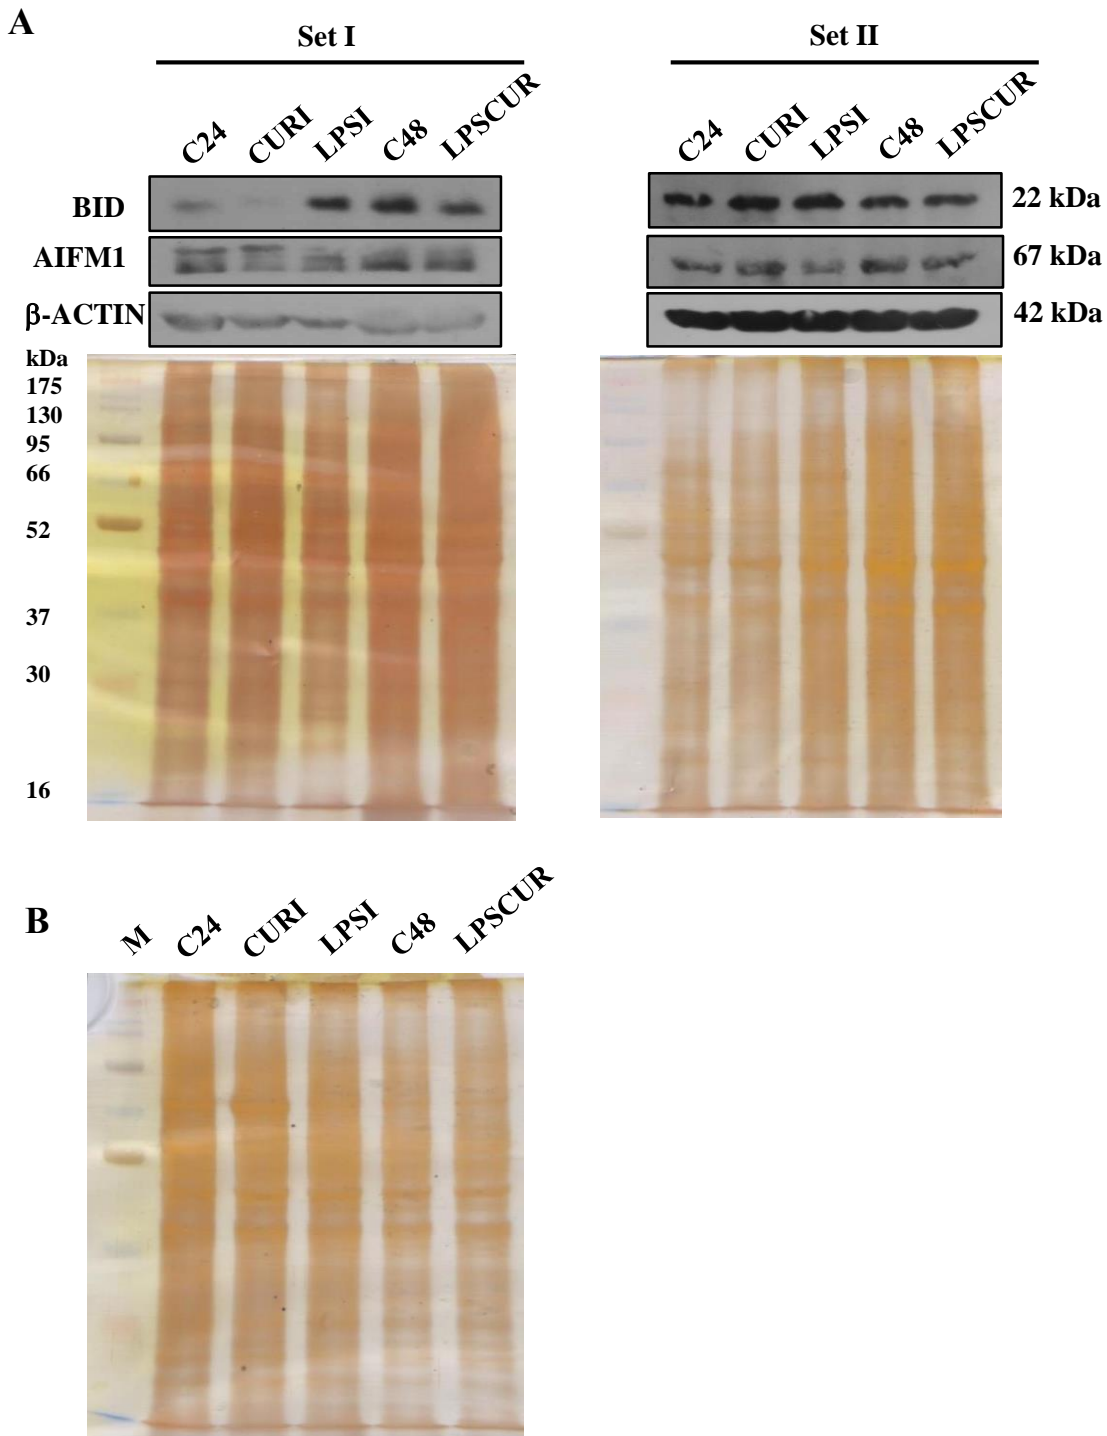

**Figure S7: Western blot analysis of BID and AIFM1 proteins isolated from A549 cells treated with LPS and/or curcumin in independent sample sets.** A549 cells were treated with curcumin (10  $\mu$ M) or LPS (1  $\mu$ g/ml) and both for 24 hours and 48 hours respectively showed BID and AIFM1 expression as analysed by Western blot. (A) Two independent sets (B) silver stained gel for Figure 6A . Silver staining gels are shown for loading control (6  $\mu$ g). Proteins were transferred to membrane and the blot was cut into 3 parts for probing BID, AIFM1 and b-actin. Extracted intensities data presented Fig. 6A



REPLICATE A

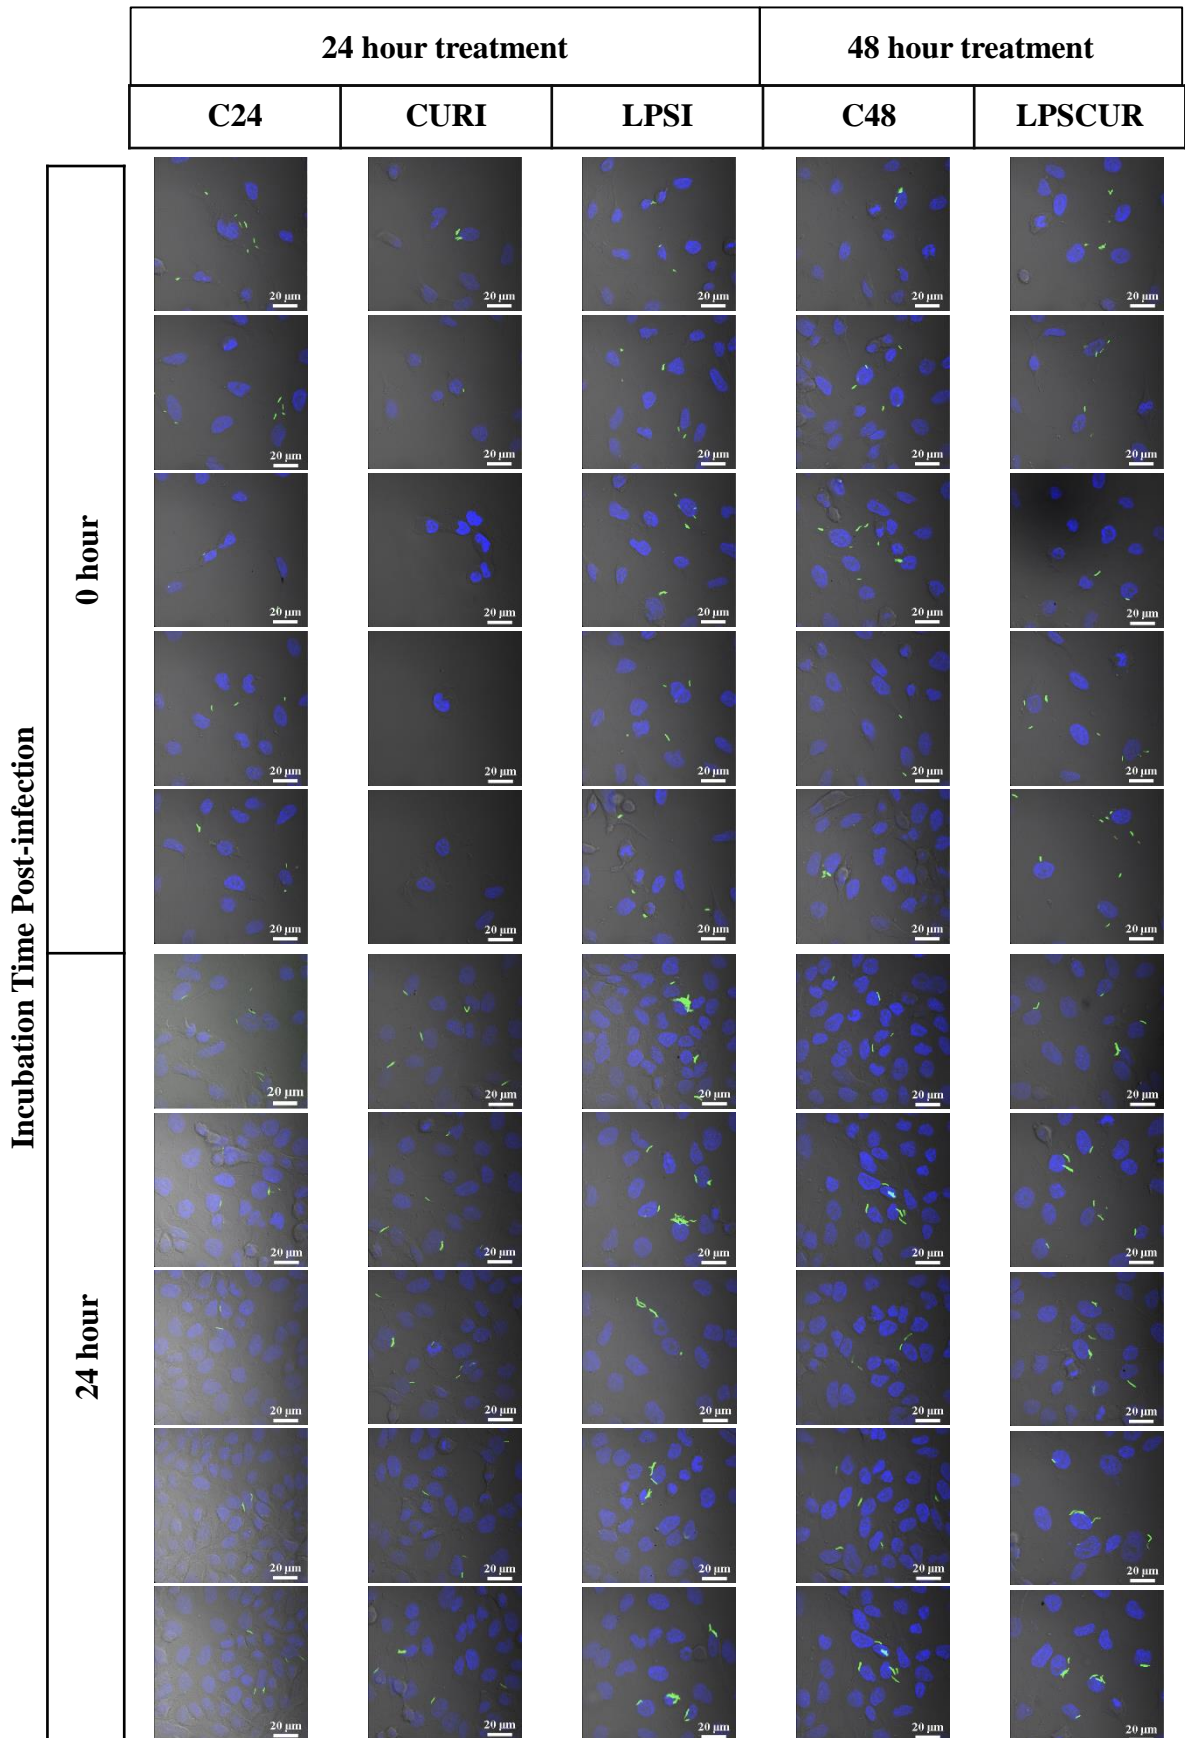

Figure S8A: Confocal images of H37Rv-GFP infected A549 cells (at multiplicity of infection 1:5) treated with Curcumin (CURI), Lipopolysaccharide (LPSI) or both (LPSCUR). Cells were incubated with DAPI (blue, 1  $\mu$ g/ml) to stain nucleus. Scale : 20  $\mu$ m

REPLICATE B

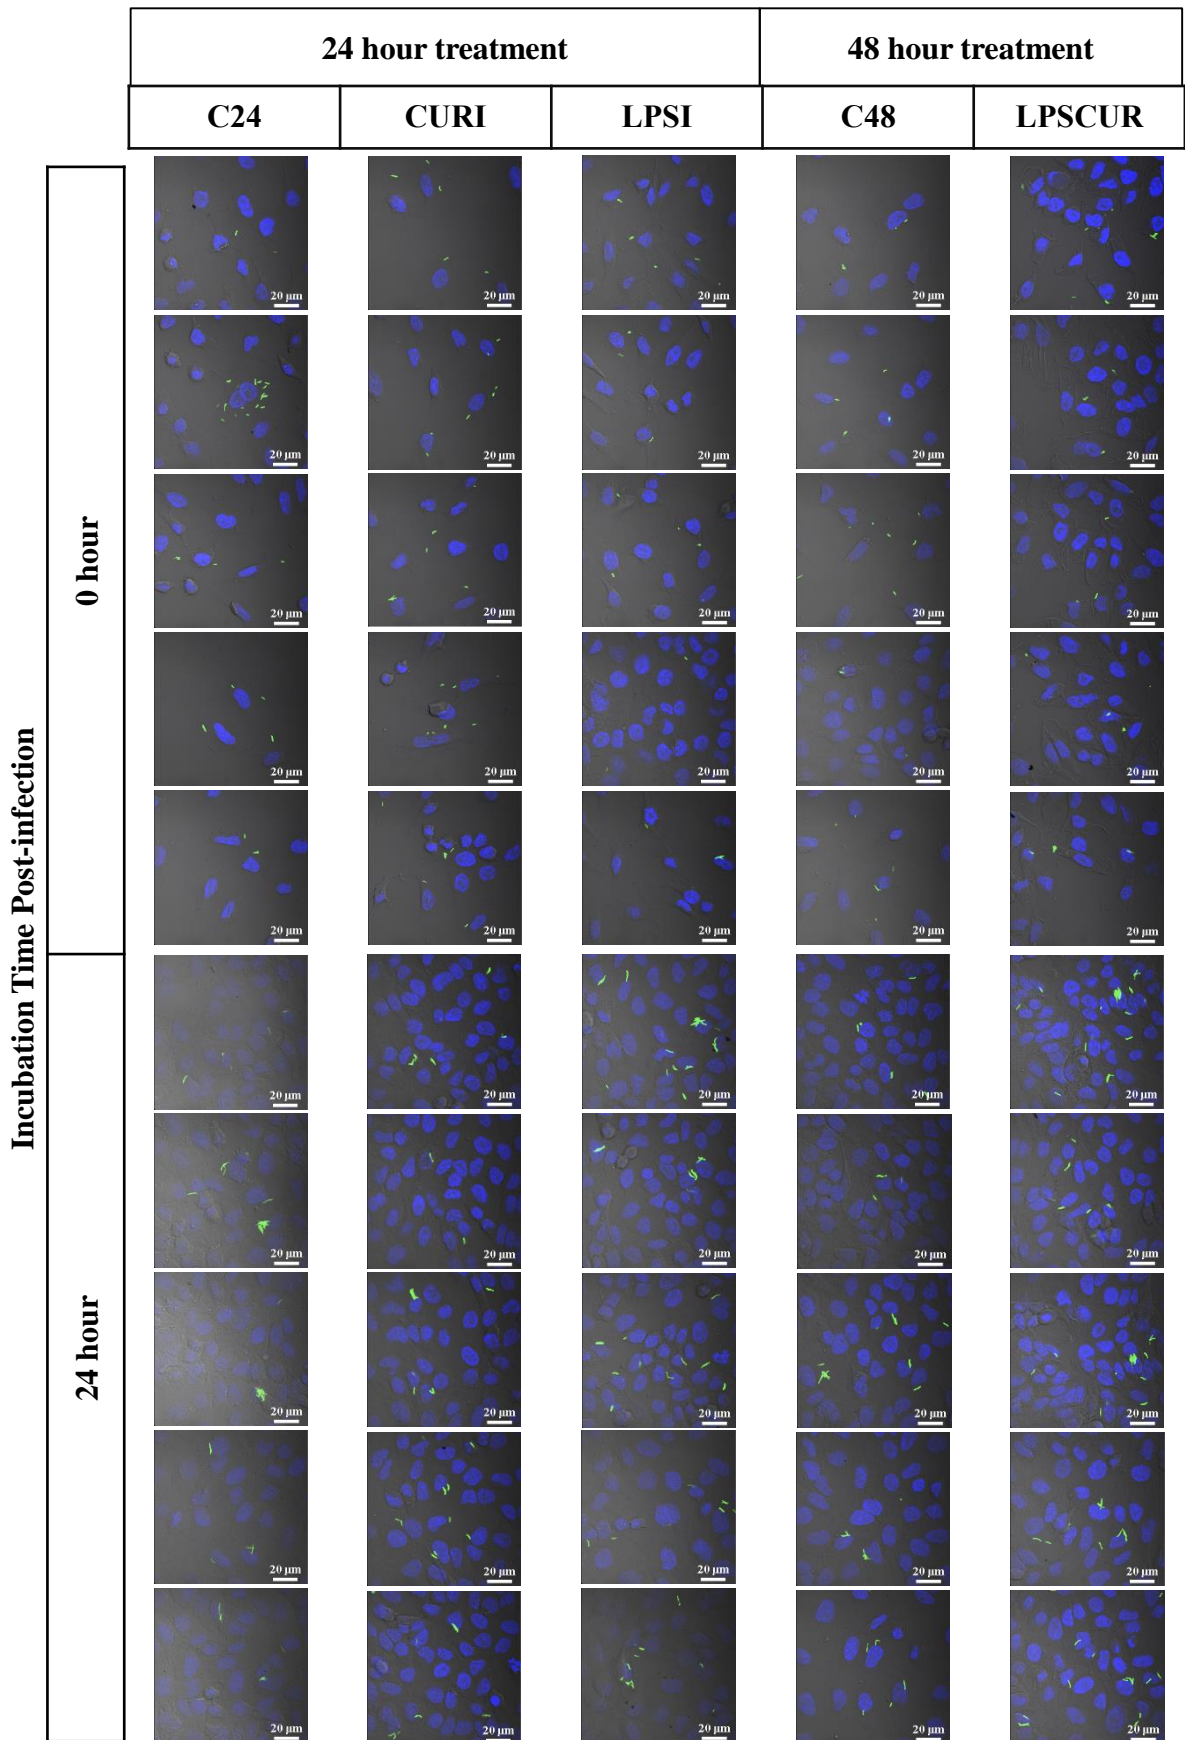

Figure S8B: Confocal images of H37Rv-GFP infected A549 cells (at multiplicity of infection 1:5) treated with Curcumin (CURI), Lipopolysaccharide (LPSI) or both (LPSCUR). Cells were incubated with DAPI (blue, 1 µg/ml) to stain nucleus. Scale : 20 µm

REPLICATE C

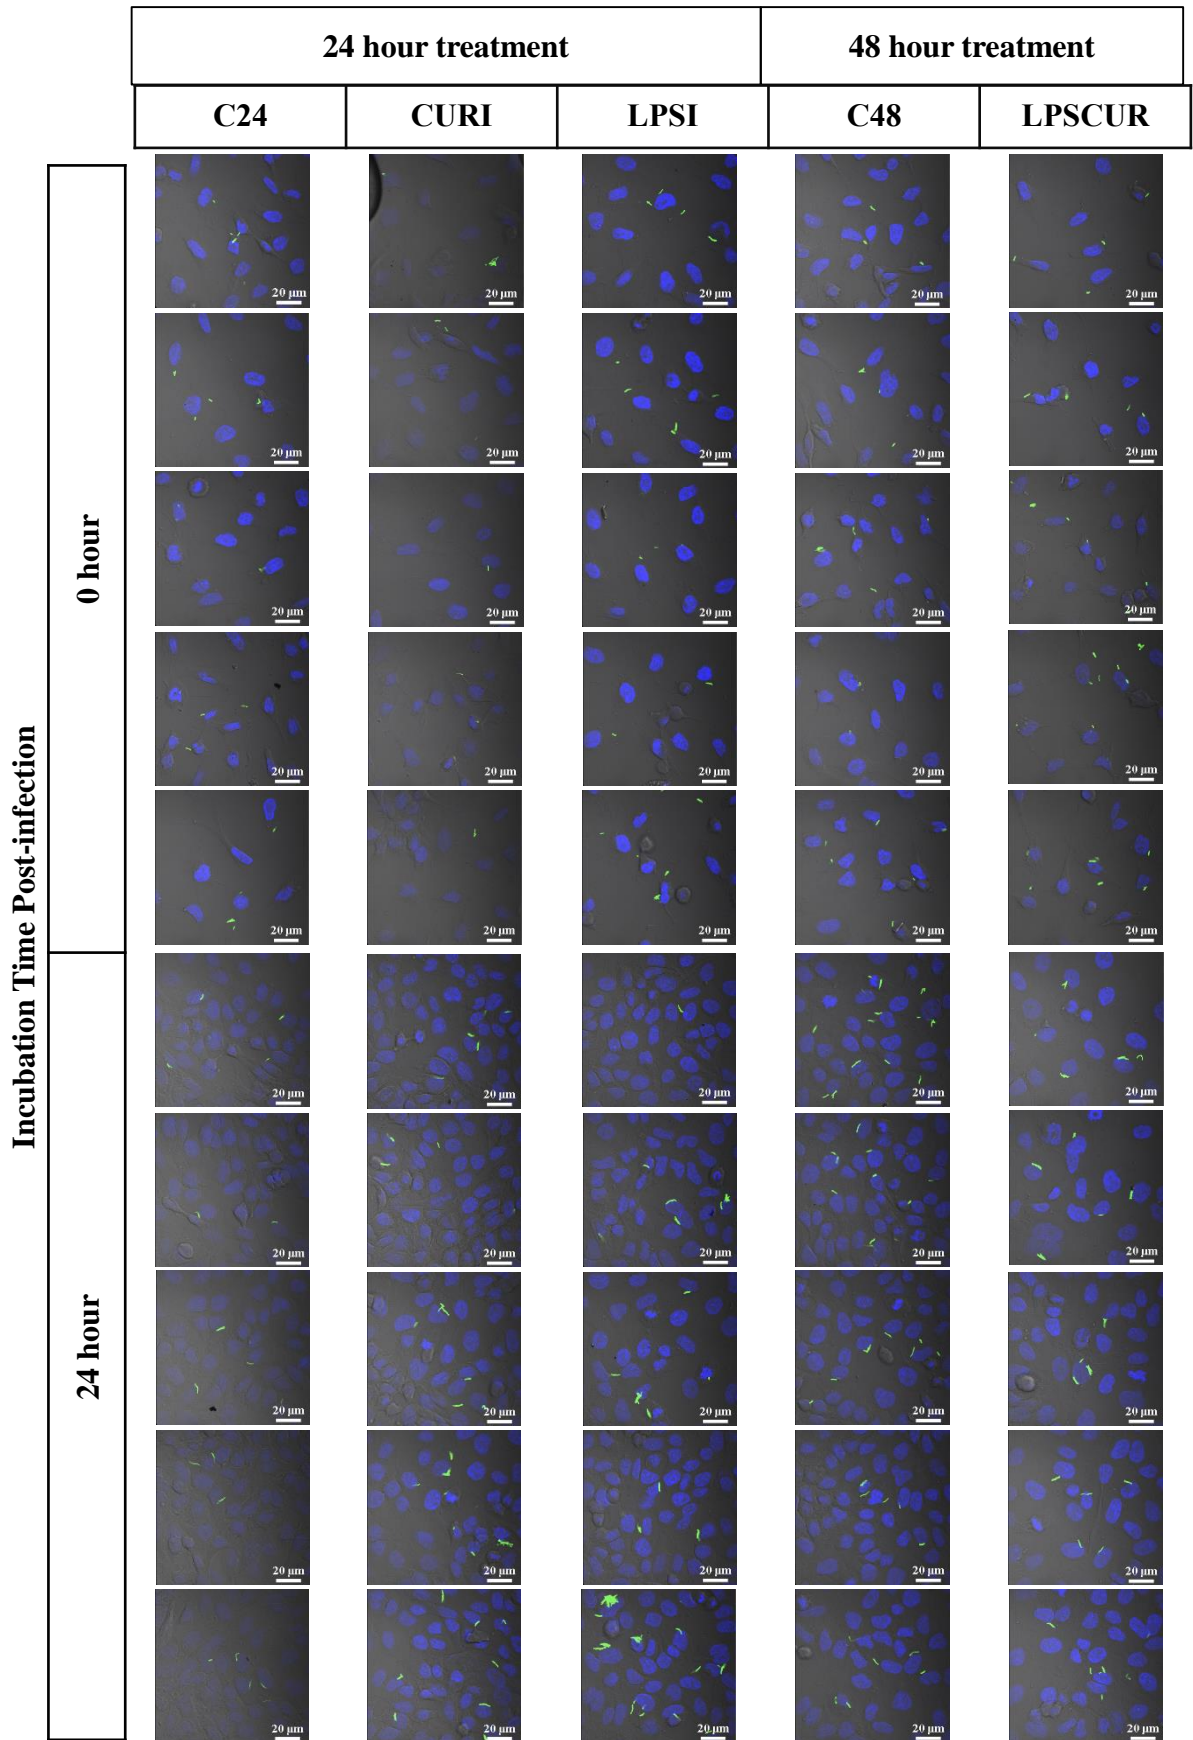

**Figure S8C:** Confocal images of H37Rv-GFP infected A549 cells (at multiplicity of infection 1:5) treated with Curcumin (CURI), Lipopolysaccharide (LPSI) or both (LPSCUR). Cells were incubated with DAPI (blue, 1  $\mu$ g/ml) to stain nucleus. Scale : 20  $\mu$ m

**Table S1. List of all identified proteins from SILAC experiments in CURI, LPSI and LPSCUR**

| S. No. | Experiments |      |        | protein ID | Protein names                                                                                                                                             | Length | Gene   | Peptides |      |        | Sequence coverage (%) |      |        |
|--------|-------------|------|--------|------------|-----------------------------------------------------------------------------------------------------------------------------------------------------------|--------|--------|----------|------|--------|-----------------------|------|--------|
|        | CURI        | LPSI | LPSCUR |            |                                                                                                                                                           |        |        | CURI     | LPSI | LPSCUR | CURI                  | LPSI | LPSCUR |
| 1      | -4.32       | 5.04 | 7.56   | P81605     | Dermcidin (EC 3.4.-.-) (Preproteolysin) [Cleaved into: Survival-promoting peptide; DCD-1]                                                                 | 110    | DCD    | 2        | 5    | 2      | 25.5                  | 35.5 | 12.7   |
| 2      | -4.28       | 4.55 | 2.47   | P35908     | Keratin, type II cytoskeletal 2 epidermal (Cytokeratin-2e) (CK-2e) (Epithelial keratin-2e) (Keratin-2 epidermis) (Keratin-2e) (K2e) (Type-II keratin Kb2) | 639    | KRT2   | 16       | 52   | 21     | 37.6                  | 82.9 | 47.1   |
| 3      | -4.23       | 0.81 | 1.23   | K7ENV7     | Isochorismatase domain-containing protein 2, mitochondrial (Fragment)                                                                                     | 174    | ISOC2  | 1        | 1    | 1      | 19                    | 9.2  | 9.2    |
| 4      | -3.92       | 0.00 | 0.00   | J3KT51     | Hematological and neurological-expressed 1 protein                                                                                                        | 104    | HN1    | 1        | 0    | 0      | 24                    | 0    | 0      |
| 5      | -3.80       | 0.00 | 3.47   | Q05639     | Elongation factor 1-alpha 2 (EF-1-alpha-2) (Eukaryotic elongation factor 1 A-2) (eEF1A-2) (Statin-S1)                                                     | 463    | EEF1A2 | 8        | 4    | 8      | 21                    | 8.4  | 21     |

|    |       |       |      |            |                                                                                                                                                             |      |          |   |   |   |      |      |      |
|----|-------|-------|------|------------|-------------------------------------------------------------------------------------------------------------------------------------------------------------|------|----------|---|---|---|------|------|------|
| 6  | -3.59 | 2.30  | 0.00 | P17096     | High mobility group protein HMG-I/HMG-Y (HMG-I(Y)) (High mobility group AT-hook protein 1) (High mobility group protein A1) (High mobility group protein R) | 107  | HMGA1    | 2 | 1 | 0 | 23.4 | 15   | 0    |
| 7  | -3.46 | 0.00  | 3.47 | A0A087WY55 | Chromosome 6 open reading frame 55, isoform CRA_b (Vacuolar protein sorting-associated protein VTA1 homolog)                                                | 280  | VTA1     | 1 | 0 | 1 | 5    | 0    | 5    |
| 8  | -3.43 | 2.43  | 4.28 | P08621     | U1 small nuclear ribonucleoprotein 70 kDa (U1 snRNP 70 kDa) (U1-70K) (snRNP70)                                                                              | 437  | SNRNP70  | 1 | 1 | 2 | 2.5  | 2.5  | 5.5  |
| 9  | -3.39 | 0.00  | 3.13 | H7C3S9     | COP9 signalosome complex subunit 8 (Fragment)                                                                                                               | 83   | COPS8    | 2 | 1 | 1 | 27.7 | 12   | 15.7 |
| 10 | -3.36 | 2.68  | 0.00 | P16402     | Histone H1.3 (Histone H1c) (Histone H1s-2)                                                                                                                  | 221  | HIST1H1D | 6 | 5 | 5 | 22.6 | 22.2 | 14.9 |
| 11 | -3.35 | 1.69  | 1.71 | Q6S8J3     | POTE ankyrin domain family member E (ANKRD26-like family C member 1A) (Prostate, ovary, testis-expressed protein on chromosome 2) (POTE-2)                  | 1075 | POTEE    | 6 | 8 | 4 | 7.7  | 9.7  | 6.3  |
| 12 | -3.29 | 0.00  | 0.00 | P25325     | 3-mercaptopyruvate sulfurtransferase (MST) (EC 2.8.1.2)                                                                                                     | 297  | MPST     | 1 | 0 | 0 | 9.1  | 0    | 0    |
| 13 | -3.28 | -0.46 | 0.42 | Q99536     | Synaptic vesicle membrane protein VAT-1 homolog (EC 1.-.-.-)                                                                                                | 393  | VAT1     | 1 | 1 | 2 | 3.8  | 3.6  | 7.4  |
| 14 | -3.04 | 0.00  | 2.30 | P05026     | Sodium/potassium-transporting ATPase subunit beta-1 (Sodium/potassium-dependent ATPase subunit beta-1)                                                      | 303  | ATP1B1   | 1 | 0 | 1 | 4.7  | 0    | 8.3  |
| 15 | -3.01 | 3.17  | 3.20 | Q562R1     | Beta-actin-like protein 2 (Kappa-actin)                                                                                                                     | 376  | ACTBL2   | 4 | 4 | 4 | 14.1 | 14.1 | 14.1 |
| 16 | -2.83 | 0.64  | 0.00 | H3BQZ9     | Adenine phosphoribosyltransferase                                                                                                                           | 153  | APRT     | 2 | 1 | 0 | 17   | 8.5  | 0    |

|    |       |      |      |        |                                                                                                                                                                                                                                  |     |        |   |   |   |      |      |      |
|----|-------|------|------|--------|----------------------------------------------------------------------------------------------------------------------------------------------------------------------------------------------------------------------------------|-----|--------|---|---|---|------|------|------|
| 17 | -2.83 | 2.97 | 2.95 | Q9NS69 | Mitochondrial import receptor subunit TOM22 homolog (hTom22) (1C9-2) (Translocase of outer membrane 22 kDa subunit homolog)                                                                                                      | 142 | TOMM22 | 3 | 3 | 3 | 43.7 | 39.4 | 43.7 |
| 18 | -2.81 | 0.00 | 1.54 | P43243 | Matrin-3                                                                                                                                                                                                                         | 847 | MATR3  | 1 | 0 | 2 | 1.7  | 0    | 3.8  |
| 19 | -2.71 | 0.57 | 0.00 | J3QL05 | Serine/arginine-rich-splicing factor 2 (Fragment)                                                                                                                                                                                | 130 | SRSF2  | 1 | 1 | 0 | 12.3 | 6.2  | 0    |
| 20 | -2.71 | 0.00 | 1.36 | Q53FA7 | Quinone oxidoreductase PIG3 (EC 1.-.-) (Tumor protein p53-inducible protein 3) (p53-induced gene 3 protein)                                                                                                                      | 332 | TP53I3 | 3 | 0 | 1 | 16.6 | 0    | 4.2  |
| 21 | -2.57 | 2.20 | 2.37 | Q16543 | Hsp90 co-chaperone Cdc37 (Hsp90 chaperone protein kinase-targeting subunit) (p50Cdc37) [Cleaved into: Hsp90 co-chaperone Cdc37, N-terminally processed]                                                                          | 378 | CDC37  | 1 | 1 | 1 | 5.6  | 5.6  | 5.6  |
| 22 | -2.55 | 0.00 | 0.00 | H7C2I4 | Zinc phosphodiesterase ELAC protein 2 (Fragment)                                                                                                                                                                                 | 286 | ELAC2  | 1 | 0 | 0 | 7.3  | 0    | 0    |
| 23 | -2.54 | 0.00 | 0.00 | Q9Y584 | Mitochondrial import inner membrane translocase subunit Tim22 (Testis-expressed sequence 4)                                                                                                                                      | 194 | TIMM22 | 1 | 0 | 0 | 7.7  | 0    | 0    |
| 24 | -2.49 | 2.03 | 2.04 | P47914 | 60S ribosomal protein L29 (Cell surface heparin-binding protein HIP)                                                                                                                                                             | 159 | RPL29  | 2 | 1 | 2 | 14.5 | 9.4  | 14.5 |
| 25 | -2.46 | 0.00 | 1.65 | P00374 | Dihydrofolate reductase (EC 1.5.1.3)                                                                                                                                                                                             | 187 | DHFR   | 1 | 0 | 1 | 11.9 | 0    | 11.9 |
| 26 | -2.46 | 0.00 | 2.02 | Q00796 | Sorbitol dehydrogenase (EC 1.1.1.14) (L-Iditol 2-dehydrogenase)                                                                                                                                                                  | 357 | SORD   | 2 | 0 | 1 | 35   | 0    | 20   |
| 27 | -2.46 | 1.75 | 0.00 | Q9NRF9 | DNA polymerase epsilon subunit 3 (EC 2.7.7.7) (Arsenic-transactivated protein) (AsTP) (Chromatin accessibility complex 17 kDa protein) (CHRAC-17) (HuCHRAC17) (DNA polymerase II subunit 3) (DNA polymerase epsilon subunit p17) | 147 | POLE3  | 1 | 1 | 0 | 10.9 | 10.9 | 0    |

|    |       |       |       |        |                                                                                                                                                                                                                                                                                                                                             |      |         |   |   |   |      |      |      |
|----|-------|-------|-------|--------|---------------------------------------------------------------------------------------------------------------------------------------------------------------------------------------------------------------------------------------------------------------------------------------------------------------------------------------------|------|---------|---|---|---|------|------|------|
| 28 | -2.44 | 1.94  | 1.97  | K7EM56 | 40S ribosomal protein S15                                                                                                                                                                                                                                                                                                                   | 112  | RPS15   | 4 | 1 | 3 | 52.7 | 10.7 | 28.6 |
| 29 | -2.43 | 0.97  | 2.02  | Q16531 | DNA damage-binding protein 1 (DDB p127 subunit) (DNA damage-binding protein a) (DDBa) (Damage-specific DNA-binding protein 1) (HBV X-associated protein 1) (XAP-1) (UV-damaged DNA-binding factor) (UV-damaged DNA-binding protein 1) (UV-DDB 1) (XPE-binding factor) (XPE-BF) (Xeroderma pigmentosum group E-complementing protein) (XPCE) | 1140 | DDB1    | 1 | 2 | 2 | 0.9  | 2    | 3    |
| 30 | -2.41 | 0.84  | 1.28  | P24666 | Low molecular weight phosphotyrosine protein phosphatase (LMW-PTP) (LMW-PTPase) (EC 3.1.3.48) (Adipocyte acid phosphatase) (Low molecular weight cytosolic acid phosphatase) (EC 3.1.3.2) (Red cell acid phosphatase 1)                                                                                                                     | 158  | ACPI    | 1 | 4 | 1 | 11.4 | 41.8 | 8.2  |
| 31 | -2.40 | -0.04 | 1.58  | Q00839 | Heterogeneous nuclear ribonucleoprotein U (hnRNP U) (Scaffold attachment factor A) (SAF-A) (p120) (pp120)                                                                                                                                                                                                                                   | 825  | HNRNPU  | 7 | 3 | 7 | 11.3 | 3.8  | 9.2  |
| 32 | -2.38 | 0.00  | 2.20  | Q8NBX0 | Saccharopine dehydrogenase-like oxidoreductase (EC 1.-.-.-)                                                                                                                                                                                                                                                                                 | 429  | SCCPDH  | 1 | 0 | 1 | 3.3  | 0    | 3.3  |
| 33 | -2.36 | 0.97  | -0.18 | P33991 | DNA replication licensing factor MCM4 (EC 3.6.4.12) (CDC21 homolog) (P1-CDC21)                                                                                                                                                                                                                                                              | 863  | MCM4    | 2 | 3 | 1 | 4.5  | 5.7  | 1.5  |
| 34 | -2.34 | -0.07 | 0.86  | Q9UMY4 | Sorting nexin-12                                                                                                                                                                                                                                                                                                                            | 172  | SNX12   | 2 | 4 | 1 | 24.7 | 20.4 | 4.3  |
| 35 | -2.34 | 1.21  | 2.03  | J3KTF8 | Rho GDP-dissociation inhibitor 1 (Fragment)                                                                                                                                                                                                                                                                                                 | 193  | ARHGDI1 | 3 | 1 | 1 | 31.6 | 7.8  | 16.6 |
| 36 | -2.28 | 0.00  | 0.47  | Q6PUV4 | Complexin-2 (Complexin II) (CPX II) (Synaphin-1)                                                                                                                                                                                                                                                                                            | 134  | CPLX2   | 1 | 0 | 1 | 8.2  | 0    | 4.5  |

|    |       |       |      |        |                                                                                                                                                                                                                                      |      |         |   |   |   |      |      |      |
|----|-------|-------|------|--------|--------------------------------------------------------------------------------------------------------------------------------------------------------------------------------------------------------------------------------------|------|---------|---|---|---|------|------|------|
| 37 | -2.27 | 0.00  | 0.00 | Q16537 | Serine/threonine-protein phosphatase 2A 56 kDa regulatory subunit epsilon isoform (PP2A B subunit isoform B'-epsilon) (PP2A B subunit isoform B56-epsilon) (PP2A B subunit isoform PR61-epsilon) (PP2A B subunit isoform R5-epsilon) | 467  | PPP2R5E | 1 | 0 | 0 | 3.2  | 0    | 0    |
| 38 | -2.25 | 0.93  | 2.29 | E9PES6 | High mobility group protein B3 (Fragment)                                                                                                                                                                                            | 153  | HMGB3   | 1 | 2 | 3 | 9.2  | 19   | 28.1 |
| 39 | -2.24 | 1.20  | 1.13 | P07954 | Fumarate hydratase, mitochondrial (Fumarase) (EC 4.2.1.2)                                                                                                                                                                            | 510  | FH      | 3 | 3 | 3 | 9.9  | 7.5  | 10.1 |
| 40 | -2.22 | 0.00  | 1.97 | C9IZ80 | Basic leucine zipper and W2 domain-containing protein 1 (Fragment)                                                                                                                                                                   | 294  | BZW1    | 1 | 0 | 2 | 8.8  | 0    | 12.9 |
| 41 | -2.18 | 0.31  | 1.85 | F8VSD4 | Ubiquitin-conjugating enzyme E2 N                                                                                                                                                                                                    | 105  | UBE2N   | 6 | 4 | 4 | 63.8 | 42.9 | 38.1 |
| 42 | -2.17 | 1.52  | 1.57 | P63000 | Ras-related C3 botulinum toxin substrate 1 (Cell migration-inducing gene 5 protein) (Ras-like protein TC25) (p21-Rac1)                                                                                                               | 192  | RAC1    | 4 | 2 | 3 | 25.5 | 13   | 19.8 |
| 43 | -2.17 | 0.00  | 1.95 | P40818 | Ubiquitin carboxyl-terminal hydrolase 8 (EC 3.4.19.12) (Deubiquitinating enzyme 8) (Ubiquitin isopeptidase Y) (hUBPy) (Ubiquitin thioesterase 8) (Ubiquitin-specific-processing protease 8)                                          | 1118 | USP8    | 1 | 0 | 1 | 1    | 0    | 1    |
| 44 | -2.17 | 1.54  | 0.00 | P08559 | Pyruvate dehydrogenase E1 component subunit alpha, somatic form, mitochondrial (EC 1.2.4.1) (PDHE1-A type I)                                                                                                                         | 390  | PDHA1   | 1 | 2 | 0 | 3.6  | 6.7  | 0    |
| 45 | -2.14 | -0.79 | 1.80 | P60983 | Glia maturation factor beta (GMF-beta)                                                                                                                                                                                               | 142  | GMFB    | 1 | 1 | 1 | 16.2 | 6.3  | 16.2 |



|    |       |      |      |        |                                                                                                                                                                                                                                                                    |     |        |    |   |   |      |      |      |
|----|-------|------|------|--------|--------------------------------------------------------------------------------------------------------------------------------------------------------------------------------------------------------------------------------------------------------------------|-----|--------|----|---|---|------|------|------|
| 46 | -2.14 | 0.00 | 0.44 | O60762 | Dolichol-phosphate mannosyltransferase subunit 1 (EC 2.4.1.83) (Dolichol-phosphate mannose synthase subunit 1) (DPM synthase subunit 1) (Dolichyl-phosphate beta-D-mannosyltransferase subunit 1) (Mannose-P-dolichol synthase subunit 1) (MPD synthase subunit 1) | 260 | DPM1   | 2  | 0 | 1 | 8.8  | 0    | 4.2  |
| 47 | -2.13 | 0.00 | 0.00 | H7C2Y1 | E3 ubiquitin-protein ligase TRIP12 (Fragment)                                                                                                                                                                                                                      | 187 | TRIP12 | 1  | 0 | 0 | 5.9  | 0    | 0    |
| 48 | -2.11 | 0.29 | 0.00 | B1AH58 | Intraflagellar transport protein 27 homolog (Fragment)                                                                                                                                                                                                             | 116 | IFT27  | 1  | 1 | 0 | 18.1 | 6.9  | 0    |
| 49 | -2.10 | 1.34 | 0.00 | A2IDC6 | 39S ribosomal protein L28, mitochondrial (Fragment)                                                                                                                                                                                                                | 240 | MRPL28 | 1  | 1 | 0 | 5    | 2.9  | 0    |
| 50 | -2.09 | 1.20 | 1.28 | Q9Y320 | Thioredoxin-related transmembrane protein 2 (Cell proliferation-inducing gene 26 protein) (Thioredoxin domain-containing protein 14)                                                                                                                               | 296 | TMX2   | 1  | 2 | 1 | 5.8  | 10.5 | 4.7  |
| 51 | -2.09 | 0.00 | 0.00 | Q9NX08 | COMM domain-containing protein 8                                                                                                                                                                                                                                   | 183 | COMMD8 | 1  | 0 | 0 | 6.6  | 0    | 0    |
| 52 | -2.07 | 0.00 | 0.00 | C9J306 | 2-hydroxyacyl-CoA lyase 1 (Fragment)                                                                                                                                                                                                                               | 244 | HACL1  | 1  | 0 | 0 | 4.1  | 0    | 0    |
| 53 | -2.07 | 0.00 | 0.98 | D6R9A6 | High mobility group protein B2 (Fragment)                                                                                                                                                                                                                          | 134 | HMGB2  | 2  | 0 | 2 | 23.1 | 0    | 17.2 |
| 54 | -2.05 | 0.00 | 0.56 | Q9UHX1 | Poly(U)-binding-splicing factor PUF60 (60 kDa poly(U)-binding-splicing factor) (FUSE-binding protein-interacting repressor) (FBP-interacting repressor) (Ro-binding protein 1) (RoBP1) (Siah-binding protein 1) (Siah-BP1)                                         | 559 | PUF60  | 2  | 0 | 2 | 8.6  | 0    | 6.8  |
| 55 | -2.04 | 0.32 | 0.70 | P18669 | Phosphoglycerate mutase 1 (EC 3.1.3.13) (EC 5.4.2.11) (EC 5.4.2.4) (BPG-dependent PGAM 1) (Phosphoglycerate mutase isozyme B) (PGAM-B)                                                                                                                             | 254 | PGAM1  | 10 | 5 | 6 | 50   | 31.1 | 34.6 |

|    |       |      |      |            |                                                                                                                                                              |     |           |   |   |   |      |      |      |
|----|-------|------|------|------------|--------------------------------------------------------------------------------------------------------------------------------------------------------------|-----|-----------|---|---|---|------|------|------|
| 56 | -2.02 | 0.00 | 0.00 | C9JQQ5     | Atlastin-2 (Fragment)                                                                                                                                        | 175 | ATL2      | 1 | 0 | 0 | 8.6  | 0    | 0    |
| 57 | -2.02 | 0.00 | 0.00 | Q9UN86     | Ras GTPase-activating protein-binding protein 2 (G3BP-2) (GAP SH3 domain-binding protein 2)                                                                  | 482 | G3BP2     | 1 | 0 | 0 | 3.8  | 0    | 0    |
| 58 | -2.00 | 0.00 | 2.05 | P53618     | Coatamer subunit beta (Beta-coat protein) (Beta-COP)                                                                                                         | 953 | COPB1     | 4 | 0 | 5 | 9.2  | 0    | 9.8  |
| 59 | -1.98 | 1.80 | 0.00 | C9JAZ1     | Metaxin-2 (Fragment)                                                                                                                                         | 229 | MTX2      | 1 | 2 | 0 | 9.6  | 16.6 | 0    |
| 60 | -1.97 | 1.93 | 1.12 | Q15056     | Eukaryotic translation initiation factor 4H (eIF-4H) (Williams-Beuren syndrome chromosomal region 1 protein)                                                 | 248 | EIF4H     | 1 | 2 | 3 | 9.2  | 21.9 | 28.1 |
| 61 | -1.97 | 0.00 | 2.14 | A0A087WZX2 | NADH dehydrogenase [ubiquinone] 1 beta subcomplex subunit 6                                                                                                  | 97  | NDUFB6    | 1 | 0 | 1 | 18.6 | 0    | 18.6 |
| 62 | -1.96 | 1.73 | 2.17 | B3KUB4     | Carbonic anhydrase 12 (Carbonic anhydrase XII, isoform CRA_d) (cDNA FLJ39526 fis, clone PUAEN2003018, highly similar to CARBONIC ANHYDRASE XII (EC 4.2.1.1)) | 283 | CA12      | 4 | 2 | 3 | 23.3 | 9.5  | 13.4 |
| 63 | -1.96 | 0.00 | 0.00 | P52907     | F-actin-capping protein subunit alpha-1 (CapZ alpha-1)                                                                                                       | 286 | CAPZA1    | 1 | 0 | 0 | 5.2  | 0    | 0    |
| 64 | -1.95 | 1.99 | 1.94 | Q14764     | Major vault protein (MVP) (Lung resistance-related protein)                                                                                                  | 893 | MVP       | 3 | 1 | 3 | 4.3  | 1.8  | 4.8  |
| 65 | -1.94 | 1.16 | 1.47 | P22626     | Heterogeneous nuclear ribonucleoproteins A2/B1 (hnRNP A2/B1)                                                                                                 | 353 | HNRNPA2B1 | 4 | 5 | 6 | 19.3 | 16.7 | 14.7 |
| 66 | -1.92 | 0.00 | 1.79 | A0A087WTP3 | Far upstream element-binding protein 2                                                                                                                       | 711 | KHSRP     | 2 | 0 | 1 | 6    | 0    | 1.5  |
| 67 | -1.91 | 0.00 | 1.45 | O00625     | Pirin (EC 1.13.11.24) (Probable quercetin 2,3-dioxygenase PIR) (Probable quercetinase)                                                                       | 290 | PIR       | 2 | 0 | 4 | 11   | 0    | 18.3 |
| 68 | -1.90 | 1.18 | 1.83 | O75439     | Mitochondrial-processing peptidase subunit beta (EC 3.4.24.64) (Beta-MPP) (P-52)                                                                             | 489 | PMPCB     | 1 | 1 | 1 | 2.2  | 2.2  | 2.2  |

|    |       |      |      |        |                                                                                                                                                                                                                                                                                                                                                   |      |         |   |    |    |      |      |      |
|----|-------|------|------|--------|---------------------------------------------------------------------------------------------------------------------------------------------------------------------------------------------------------------------------------------------------------------------------------------------------------------------------------------------------|------|---------|---|----|----|------|------|------|
| 69 | -1.90 | 0.00 | 0.47 | P49915 | GMP synthase [glutamine-hydrolyzing] (EC 6.3.5.2) (GMP synthetase) (Glutamine amidotransferase)                                                                                                                                                                                                                                                   | 693  | GMPS    | 2 | 0  | 3  | 3.9  | 0    | 5.7  |
| 70 | -1.90 | 0.78 | 1.08 | P52895 | Aldo-keto reductase family 1 member C2 (EC 1.-.-.) (3-alpha-HSD3) (Chlordecone reductase homolog HAKRD) (Dihydrodiol dehydrogenase 2) (DD-2) (DD2) (Dihydrodiol dehydrogenase/bile acid-binding protein) (DD/BABP) (Trans-1,2-dihydrobenzene-1,2-diol dehydrogenase) (EC 1.3.1.20) (Type III 3-alpha-hydroxysteroid dehydrogenase) (EC 1.1.1.357) | 323  | AKR1C2  | 8 | 10 | 10 | 39.6 | 49.2 | 49.2 |
| 71 | -1.89 | 0.00 | 2.47 | P11498 | Pyruvate carboxylase, mitochondrial (EC 6.4.1.1) (Pyruvic carboxylase) (PCB)                                                                                                                                                                                                                                                                      | 1178 | PC      | 2 | 0  | 1  | 2.2  | 0    | 1.1  |
| 72 | -1.88 | 0.00 | 0.00 | C9JYQ9 | 60S ribosomal protein L22-like 1                                                                                                                                                                                                                                                                                                                  | 121  | RPL22L1 | 1 | 0  | 0  | 19.8 | 0    | 0    |
| 73 | -1.88 | 0.00 | 1.25 | O00159 | Unconventional myosin-Ic (Myosin I beta) (MMI-beta) (MMIb)                                                                                                                                                                                                                                                                                        | 1063 | MYO1C   | 1 | 0  | 2  | 1.8  | 0    | 2.9  |
| 74 | -1.87 | 0.23 | 0.39 | Q01105 | Protein SET (HLA-DR-associated protein II) (Inhibitor of granzyme A-activated DNase) (IGAAD) (PHAPII) (Phosphatase 2A inhibitor I2PP2A) (I-2PP2A) (Template-activating factor I) (TAF-I)                                                                                                                                                          | 290  | SET     | 2 | 5  | 2  | 7.9  | 30.2 | 7.9  |
| 75 | -1.87 | 1.28 | 1.97 | Q9BSJ8 | Extended synaptotagmin-1 (E-Syt1) (Membrane-bound C2 domain-containing protein)                                                                                                                                                                                                                                                                   | 1104 | ESYT1   | 2 | 4  | 1  | 2.9  | 4.9  | 1.4  |

|    |       |      |      |        |                                                                                                                                                                                                                                                                                                  |      |         |   |   |   |      |      |      |
|----|-------|------|------|--------|--------------------------------------------------------------------------------------------------------------------------------------------------------------------------------------------------------------------------------------------------------------------------------------------------|------|---------|---|---|---|------|------|------|
| 76 | -1.87 | 0.56 | 1.34 | P30041 | Peroxiredoxin-6 (EC 1.11.1.15) (1-Cys peroxiredoxin) (1-Cys PRX) (24 kDa protein) (Acidic calcium-independent phospholipase A2) (aiPLA2) (EC 3.1.1.-) (Antioxidant protein 2) (Liver 2D page spot 40) (Non-selenium glutathione peroxidase) (NSGPx) (EC 1.11.1.9) (Red blood cells page spot 12) | 224  | PRDX6   | 8 | 9 | 9 | 41.5 | 51.3 | 33.9 |
| 77 | -1.86 | 0.70 | 2.05 | P62861 | 40S ribosomal protein S30                                                                                                                                                                                                                                                                        | 59   | FAU     | 1 | 1 | 1 | 16.9 | 16.9 | 16.9 |
| 78 | -1.86 | 1.77 | 1.64 | Q14696 | LDLR chaperone MESD (Mesoderm development candidate 2) (Mesoderm development protein) (Renal carcinoma antigen NY-REN-61)                                                                                                                                                                        | 234  | MESDC2  | 1 | 2 | 1 | 4.3  | 9    | 4.7  |
| 79 | -1.85 | 0.00 | 0.00 | H0YN84 | Serine/threonine-protein phosphatase 2A 56 kDa regulatory subunit gamma isoform (Fragment)                                                                                                                                                                                                       | 89   | PPP2R5C | 1 | 0 | 0 | 12.4 | 0    | 0    |
| 80 | -1.85 | 0.00 | 2.33 | O76031 | ATP-dependent Clp protease ATP-binding subunit clpX-like, mitochondrial                                                                                                                                                                                                                          | 633  | CLPX    | 1 | 0 | 1 | 2.1  | 0    | 2.1  |
| 81 | -1.85 | 0.00 | 0.00 | O60884 | DnaJ homolog subfamily A member 2 (Cell cycle progression restoration gene 3 protein) (Dnj3) (Dj3) (HIRA-interacting protein 4) (Renal carcinoma antigen NY-REN-14)                                                                                                                              | 412  | DNAJA2  | 1 | 0 | 0 | 3.6  | 0    | 0    |
| 82 | -1.82 | 1.97 | 1.71 | P51970 | NADH dehydrogenase [ubiquinone] 1 alpha subcomplex subunit 8 (Complex I-19kD) (CI-19kD) (Complex I-PGIV) (CI-PGIV) (NADH-ubiquinone oxidoreductase 19 kDa subunit)                                                                                                                               | 172  | NDUFA8  | 2 | 3 | 1 | 22.7 | 27.3 | 10.5 |
| 83 | -1.82 | 0.72 | 1.11 | Q8TEX9 | Importin-4 (Imp4) (Importin-4b) (Imp4b) (Ran-binding protein 4) (RanBP4)                                                                                                                                                                                                                         | 1081 | IPO4    | 4 | 3 | 2 | 5.5  | 3.1  | 2    |
| 84 | -1.80 | 1.89 | 1.70 | Q5SZE2 | Ceramide synthase 2 (Fragment)                                                                                                                                                                                                                                                                   | 128  | CERS2   | 1 | 1 | 1 | 12.5 | 12.5 | 12.5 |

|    |       |       |      |        |                                                                                                      |      |         |   |    |    |      |      |      |
|----|-------|-------|------|--------|------------------------------------------------------------------------------------------------------|------|---------|---|----|----|------|------|------|
| 85 | -1.80 | 1.34  | 2.08 | J3KNF8 | Cytochrome b5 type B (Cytochrome b5 type B (Outer mitochondrial membrane), isoform CRA_a)            | 150  | CYB5B   | 2 | 4  | 2  | 35.3 | 53.3 | 35.3 |
| 86 | -1.79 | 1.30  | 2.00 | P07099 | Epoxide hydrolase 1 (EC 3.3.2.9) (Epoxide hydratase) (Microsomal epoxide hydrolase)                  | 455  | EPHX1   | 6 | 5  | 9  | 24   | 14.7 | 35.2 |
| 87 | -1.79 | 1.96  | 2.08 | P10606 | Cytochrome c oxidase subunit 5B, mitochondrial (Cytochrome c oxidase polypeptide Vb)                 | 129  | COX5B   | 2 | 4  | 2  | 18.6 | 24.8 | 17.8 |
| 88 | -1.79 | 0.00  | 1.13 | F5GZ49 | Glycolipid transfer protein (Glycolipid transfer protein isoform 1)                                  | 67   | GLTP    | 1 | 0  | 1  | 22.4 | 0    | 22.4 |
| 89 | -1.76 | 0.00  | 1.32 | Q9Y2V2 | Calcium-regulated heat stable protein 1 (Calcium-regulated heat-stable protein of 24 kDa) (CRHSP-24) | 147  | CARHSP1 | 2 | 0  | 2  | 35.4 | 0    | 35.4 |
| 90 | -1.76 | -0.05 | 1.04 | P62899 | 60S ribosomal protein L31                                                                            | 125  | RPL31   | 3 | 4  | 1  | 24.8 | 31.2 | 6.4  |
| 91 | -1.75 | 0.00  | 2.30 | Q5VWN6 | Protein FAM208B                                                                                      | 2430 | FAM208B | 1 | 0  | 1  | 0.4  | 0    | 0.4  |
| 92 | -1.75 | 3.47  | 1.29 | K7ESE8 | Bleomycin hydrolase (Fragment)                                                                       | 231  | BLMH    | 1 | 1  | 1  | 4.8  | 4.8  | 4.8  |
| 93 | -1.74 | 1.12  | 1.35 | Q9Y3E5 | Peptidyl-tRNA hydrolase 2, mitochondrial (PTH 2) (EC 3.1.1.29) (Bcl-2 inhibitor of transcription 1)  | 179  | PTRH2   | 3 | 5  | 2  | 31.8 | 44.7 | 21.2 |
| 94 | -1.73 | 1.73  | 0.00 | Q8N766 | ER membrane protein complex subunit 1                                                                | 993  | EMC1    | 1 | 2  | 0  | 1.6  | 3.1  | 0    |
| 95 | -1.72 | 2.20  | 1.71 | P62314 | Small nuclear ribonucleoprotein Sm D1 (Sm-D1) (Sm-D autoantigen) (snRNP core protein D1)             | 119  | SNRPD1  | 2 | 2  | 2  | 26.1 | 26.1 | 26.1 |
| 96 | -1.70 | 2.07  | 1.64 | Q09666 | Neuroblast differentiation-associated protein AHNAK (Desmoyokin)                                     | 5890 | AHNAK   | 7 | 22 | 17 | 4.2  | 15.3 | 10.6 |

|     |       |       |      |            |                                                                                                                                                                                                                    |     |        |   |   |    |      |      |      |
|-----|-------|-------|------|------------|--------------------------------------------------------------------------------------------------------------------------------------------------------------------------------------------------------------------|-----|--------|---|---|----|------|------|------|
| 97  | -1.68 | 0.75  | 1.12 | P35268     | 60S ribosomal protein L22 (EBER-associated protein) (EAP) (Epstein-Barr virus small RNA-associated protein) (Heparin-binding protein HBp15)                                                                        | 128 | RPL22  | 1 | 1 | 1  | 20.3 | 8.6  | 8.6  |
| 98  | -1.68 | 0.13  | 1.48 | E1CEI4     | Glutamate--cysteine ligase catalytic subunit (Glutamate-cysteine ligase delta4 alternative splicing variant)                                                                                                       | 599 | GCLC   | 1 | 1 | 2  | 1.5  | 1.5  | 4.5  |
| 99  | -1.68 | 0.00  | 1.27 | Q15233     | Non-POU domain-containing octamer-binding protein (NonO protein) (54 kDa nuclear RNA- and DNA-binding protein) (55 kDa nuclear protein) (DNA-binding p52/p100 complex, 52 kDa subunit) (NMT55) (p54(nrb)) (p54nrb) | 471 | NONO   | 2 | 0 | 3  | 7.9  | 0    | 11.5 |
| 100 | -1.68 | 6.59  | 0.69 | P21399     | Cytoplasmic aconitate hydratase (Aconitase) (EC 4.2.1.3) (Citrate hydro-lyase) (Ferritin repressor protein) (Iron regulatory protein 1) (IRP1) (Iron-responsive element-binding protein 1) (IRE-BP 1)              | 889 | ACO1   | 2 | 1 | 2  | 4.3  | 0.9  | 3.7  |
| 101 | -1.67 | 0.44  | 1.96 | E9PLL6     | 60S ribosomal protein L27a                                                                                                                                                                                         | 108 | RPL27A | 2 | 2 | 1  | 23.1 | 18.5 | 11.1 |
| 102 | -1.67 | 0.00  | 2.52 | Q6PI78     | Transmembrane protein 65                                                                                                                                                                                           | 240 | TMEM65 | 1 | 0 | 1  | 4.6  | 0    | 4.6  |
| 103 | -1.66 | 1.65  | 0.00 | Q9Y2B0     | Protein canopy homolog 2 (MIR-interacting saposin-like protein) (Putative secreted protein Zsig9) (Transmembrane protein 4)                                                                                        | 182 | CNPY2  | 1 | 4 | 0  | 8.8  | 31.3 | 0    |
| 104 | -1.66 | 0.00  | 0.00 | B1ANR0     | Polyadenylate-binding protein (PABP)                                                                                                                                                                               | 615 | PABPC4 | 4 | 2 | 4  | 8.5  | 4.4  | 8.8  |
| 105 | -1.65 | 0.00  | 0.43 | P08243     | Asparagine synthetase [glutamine-hydrolyzing] (EC 6.3.5.4) (Cell cycle control protein TS11) (Glutamine-dependent asparagine synthetase)                                                                           | 561 | ASNS   | 2 | 0 | 1  | 4.6  | 0    | 2    |
| 106 | -1.64 | -0.54 | 0.75 | A0A087WSW9 | Thioredoxin reductase 1, cytoplasmic                                                                                                                                                                               | 548 | TXNRD1 | 9 | 1 | 10 | 23.2 | 1.8  | 19.3 |

|     |       |      |      |        |                                                                                                                                                                                                                                                                                                                        |     |           |   |    |   |      |      |      |
|-----|-------|------|------|--------|------------------------------------------------------------------------------------------------------------------------------------------------------------------------------------------------------------------------------------------------------------------------------------------------------------------------|-----|-----------|---|----|---|------|------|------|
| 107 | -1.64 | 0.17 | 1.57 | P61353 | 60S ribosomal protein L27                                                                                                                                                                                                                                                                                              | 136 | RPL27     | 1 | 1  | 2 | 6.6  | 6.6  | 22.1 |
| 108 | -1.63 | 0.00 | 0.83 | E9PNF3 | L-aminoadipate-semialdehyde dehydrogenase-phosphopantetheinyl transferase (Fragment)                                                                                                                                                                                                                                   | 160 | AASDHPPT  | 2 | 0  | 1 | 17.5 | 0    | 10.6 |
| 109 | -1.61 | 0.00 | 0.32 | D6RD69 | GTP-binding protein SAR1b (Fragment)                                                                                                                                                                                                                                                                                   | 170 | SAR1B     | 3 | 2  | 4 | 27.6 | 11.2 | 34.1 |
| 110 | -1.61 | 1.06 | 2.06 | Q99880 | Histone H2B type 1-L (Histone H2B.c) (H2B/c)                                                                                                                                                                                                                                                                           | 126 | HIST1H2BL | 2 | 4  | 3 | 15.1 | 23.8 | 27   |
| 111 | -1.61 | 0.92 | 2.62 | Q5T7C4 | High mobility group protein B1                                                                                                                                                                                                                                                                                         | 158 | HMGB1     | 5 | 5  | 2 | 32.9 | 34.8 | 14.6 |
| 112 | -1.58 | 0.76 | 0.00 | E9PGT1 | Translin                                                                                                                                                                                                                                                                                                               | 223 | TSN       | 1 | 1  | 0 | 7.2  | 7.2  | 0    |
| 113 | -1.58 | 0.77 | 1.63 | Q08257 | Quinone oxidoreductase (EC 1.6.5.5) (NADPH:quinone reductase) (Zeta-crystallin)                                                                                                                                                                                                                                        | 329 | CRYZ      | 4 | 5  | 3 | 21.7 | 24.1 | 17.3 |
| 114 | -1.57 | 1.09 | 1.12 | P68032 | Actin, alpha cardiac muscle 1 (Alpha-cardiac actin)                                                                                                                                                                                                                                                                    | 377 | ACTC1     | 7 | 10 | 7 | 22.3 | 30.5 | 22.3 |
| 115 | -1.55 | 1.94 | 0.00 | Q9BYN0 | Sulfiredoxin-1 (EC 1.8.98.2)                                                                                                                                                                                                                                                                                           | 137 | SRXN1     | 1 | 2  | 0 | 10.2 | 14.6 | 0    |
| 116 | -1.54 | 0.13 | 1.69 | M0R3D6 | 60S ribosomal protein L18a (Fragment)                                                                                                                                                                                                                                                                                  | 141 | RPL18A    | 2 | 4  | 1 | 13.5 | 29.1 | 7.1  |
| 117 | -1.54 | 0.56 | 0.70 | P11586 | C-1-tetrahydrofolate synthase, cytoplasmic (C1-THF synthase) [Cleaved into: C-1-tetrahydrofolate synthase, cytoplasmic, N-terminally processed] [Includes: Methylenetetrahydrofolate dehydrogenase (EC 1.5.1.5); Methenyltetrahydrofolate cyclohydrolase (EC 3.5.4.9); Formyltetrahydrofolate synthetase (EC 6.3.4.3)] | 935 | MTHFD1    | 5 | 4  | 6 | 7.4  | 6.8  | 10.9 |
| 118 | -1.54 | 0.00 | 1.57 | J3QSB5 | 60S ribosomal protein L36                                                                                                                                                                                                                                                                                              | 94  | RPL36     | 1 | 1  | 1 | 9.6  | 9.6  | 9.6  |
| 119 | -1.53 | 0.00 | 0.00 | Q9NUQ9 | Protein FAM49B (L1)                                                                                                                                                                                                                                                                                                    | 324 | FAM49B    | 1 | 0  | 0 | 10.7 | 0    | 0    |
| 120 | -1.53 | 0.00 | 1.85 | F5H6T1 | ARP2 actin-related protein 2 homolog (Yeast), isoform CRA_d (Actin-related protein 2)                                                                                                                                                                                                                                  | 339 | ACTR2     | 2 | 0  | 2 | 8    | 0    | 9.4  |
| 121 | -1.53 | 0.00 | 2.15 | P62277 | 40S ribosomal protein S13                                                                                                                                                                                                                                                                                              | 151 | RPS13     | 4 | 1  | 3 | 27.8 | 7.3  | 25.2 |

|     |       |      |      |        |                                                                                                                                       |     |          |   |    |   |      |      |      |
|-----|-------|------|------|--------|---------------------------------------------------------------------------------------------------------------------------------------|-----|----------|---|----|---|------|------|------|
| 122 | -1.53 | 0.00 | 0.00 | F8WBT4 | Ribulose-phosphate 3-epimerase                                                                                                        | 60  | RPE      | 1 | 0  | 0 | 31.7 | 0    | 0    |
| 123 | -1.52 | 2.22 | 1.06 | Q9UJZ1 | Stomatin-like protein 2, mitochondrial (SLP-2) (EPB72-like protein 2) (Paraprotein target 7) (Paratarg-7)                             | 356 | STOML2   | 2 | 3  | 6 | 10.3 | 15.4 | 39.5 |
| 124 | -1.51 | 0.00 | 0.00 | B0QZK9 | Heterochromatin protein 1-binding protein 3 (Fragment)                                                                                | 75  | HP1BP3   | 1 | 0  | 0 | 20   | 0    | 0    |
| 125 | -1.50 | 0.48 | 0.30 | Q9NTK5 | Obg-like ATPase 1 (DNA damage-regulated overexpressed in cancer 45) (DOC45) (GTP-binding protein 9)                                   | 396 | OLA1     | 4 | 1  | 5 | 12.9 | 3.8  | 14.6 |
| 126 | -1.50 | 0.38 | 2.18 | P62854 | 40S ribosomal protein S26                                                                                                             | 115 | RPS26    | 1 | 1  | 1 | 13   | 13   | 13   |
| 127 | -1.49 | 0.51 | 1.87 | P62081 | 40S ribosomal protein S7                                                                                                              | 194 | RPS7     | 6 | 6  | 7 | 34.5 | 30.4 | 45.9 |
| 128 | -1.49 | 0.46 | 0.09 | Q15691 | Microtubule-associated protein RP/EB family member 1 (APC-binding protein EB1) (End-binding protein 1) (EB1)                          | 268 | MAPRE1   | 3 | 7  | 2 | 15.7 | 27.2 | 11.2 |
| 129 | -1.49 | 0.00 | 1.15 | H0YL99 | 28S ribosomal protein S11, mitochondrial                                                                                              | 118 | MRPS11   | 2 | 0  | 1 | 22   | 0    | 9.3  |
| 130 | -1.48 | 0.95 | 1.09 | P23396 | 40S ribosomal protein S3 (EC 4.2.99.18)                                                                                               | 243 | RPS3     | 9 | 10 | 8 | 45.3 | 47.7 | 30   |
| 131 | -1.47 | 0.00 | 0.00 | Q9UIM3 | FK506-binding protein-like (WAF-1/CIP1 stabilizing protein 39) (WISp39)                                                               | 349 | FKBPL    | 1 | 0  | 0 | 2.3  | 0    | 0    |
| 132 | -1.47 | 0.00 | 0.00 | O00764 | Pyridoxal kinase (EC 2.7.1.35) (Pyridoxine kinase)                                                                                    | 312 | PDXK     | 1 | 0  | 0 | 8.8  | 0    | 0    |
| 133 | -1.47 | 1.71 | 2.32 | Q9H061 | Transmembrane protein 126A                                                                                                            | 195 | TMEM126A | 1 | 1  | 1 | 10.3 | 4.6  | 10.3 |
| 134 | -1.47 | 0.76 | 0.90 | P62263 | 40S ribosomal protein S14                                                                                                             | 151 | RPS14    | 5 | 2  | 2 | 30.5 | 13.9 | 7.9  |
| 135 | -1.47 | 0.92 | 0.67 | O96008 | Mitochondrial import receptor subunit TOM40 homolog (Protein Haymaker) (Translocase of outer membrane 40 kDa subunit homolog) (p38.5) | 361 | TOMM40   | 3 | 3  | 2 | 11.9 | 7.2  | 4.7  |
| 136 | -1.46 | 0.00 | 0.00 | P58557 | Putative ribonuclease                                                                                                                 | 167 | YBEY     | 1 | 0  | 0 | 9.6  | 0    | 0    |



|     |       |       |      |        |                                                                                                                                                                                                                          |     |        |   |   |   |      |      |      |
|-----|-------|-------|------|--------|--------------------------------------------------------------------------------------------------------------------------------------------------------------------------------------------------------------------------|-----|--------|---|---|---|------|------|------|
| 137 | -1.46 | 0.00  | 1.19 | P09972 | Fructose-bisphosphate aldolase C (EC 4.1.2.13) (Brain-type aldolase)                                                                                                                                                     | 364 | ALDOC  | 1 | 1 | 1 | 6.3  | 1.9  | 6.3  |
| 138 | -1.46 | 1.23  | 0.00 | E5RJI7 | 39S ribosomal protein L13, mitochondrial (Fragment)                                                                                                                                                                      | 147 | MRPL13 | 1 | 1 | 0 | 10.2 | 10.2 | 0    |
| 139 | -1.45 | 1.08  | 1.73 | Q9Y295 | Developmentally-regulated GTP-binding protein 1 (DRG-1) (Neural precursor cell expressed developmentally down-regulated protein 3) (NEDD-3)                                                                              | 367 | DRG1   | 1 | 2 | 2 | 3    | 6.8  | 6.8  |
| 140 | -1.45 | 0.71  | 0.40 | Q9HC38 | Glyoxalase domain-containing protein 4                                                                                                                                                                                   | 313 | GLOD4  | 4 | 2 | 4 | 13.8 | 8.1  | 13.1 |
| 141 | -1.45 | -0.09 | 0.39 | Q9UUK9 | ADP-sugar pyrophosphatase (EC 3.6.1.13) (8-oxo-dGDP phosphatase) (EC 3.6.1.58) (Nucleoside diphosphate-linked moiety X motif 5) (Nudix motif 5) (YSA1H)                                                                  | 219 | NUDT5  | 4 | 3 | 5 | 26.5 | 16.4 | 26   |
| 142 | -1.44 | 0.67  | 1.06 | H0Y2V1 | Microtubule-associated protein (Fragment)                                                                                                                                                                                | 463 | MAP4   | 1 | 1 | 1 | 3.7  | 3.7  | 3.7  |
| 143 | -1.44 | 1.58  | 0.84 | P04844 | Dolichyl-diphosphooligosaccharide--protein glycosyltransferase subunit 2 (EC 2.4.99.18) (Dolichyl-diphosphooligosaccharide--protein glycosyltransferase 63 kDa subunit) (RIBIIR) (Ribophorin II) (RPN-II) (Ribophorin-2) | 631 | RPN2   | 3 | 6 | 4 | 8.3  | 19   | 13.2 |
| 144 | -1.44 | 0.92  | 1.68 | M0R3H0 | 40S ribosomal protein S16                                                                                                                                                                                                | 100 | RPS16  | 2 | 3 | 2 | 18   | 29   | 18   |
| 145 | -1.44 | 1.01  | 1.76 | K7ENG2 | Splicing factor U2AF 65 kDa subunit                                                                                                                                                                                      | 307 | U2AF2  | 3 | 1 | 2 | 8.5  | 5.2  | 9.1  |

|     |       |       |      |        |                                                                                                                                                                                                                                                                                                                                                                                              |      |        |    |   |    |      |      |      |
|-----|-------|-------|------|--------|----------------------------------------------------------------------------------------------------------------------------------------------------------------------------------------------------------------------------------------------------------------------------------------------------------------------------------------------------------------------------------------------|------|--------|----|---|----|------|------|------|
| 146 | -1.43 | 0.79  | 1.11 | P23141 | Liver carboxylesterase 1 (Acyl-coenzyme A:cholesterol acyltransferase) (ACAT) (Brain carboxylesterase hBr1) (Carboxylesterase 1) (CE-1) (hCE-1) (EC 3.1.1.1) (Cocaine carboxylesterase) (Egasyn) (HMSE) (Methylumbelliferyl-acetate deacetylase 1) (EC 3.1.1.56) (Monocyte/macrophage serine esterase) (Retinyl ester hydrolase) (REH) (Serine esterase 1) (Triacylglycerol hydrolase) (TGH) | 567  | CES1   | 5  | 5 | 3  | 13.6 | 13.8 | 7.8  |
| 147 | -1.43 | 0.00  | 0.00 | Q9NR09 | Baculoviral IAP repeat-containing protein 6 (EC 6.3.2.-) (BIR repeat-containing ubiquitin-conjugating enzyme) (BRUCE) (Ubiquitin-conjugating BIR domain enzyme apollon) (APOLLON)                                                                                                                                                                                                            | 4857 | BIRC6  | 1  | 0 | 0  | 0.2  | 0    | 0    |
| 148 | -1.43 | 0.00  | 0.92 | P29144 | Tripeptidyl-peptidase 2 (TPP-2) (EC 3.4.14.10) (Tripeptidyl aminopeptidase) (Tripeptidyl-peptidase II) (TPP-II)                                                                                                                                                                                                                                                                              | 1249 | TPP2   | 2  | 0 | 1  | 2.2  | 0    | 0.8  |
| 149 | -1.43 | 0.63  | 0.59 | Q99832 | T-complex protein 1 subunit eta (TCP-1-eta) (CCT-eta) (HIV-1 Nef-interacting protein)                                                                                                                                                                                                                                                                                                        | 543  | CCT7   | 10 | 4 | 10 | 20.1 | 10.9 | 22.5 |
| 150 | -1.43 | 0.00  | 1.03 | H0YKU1 | Tropomodulin-3 (Fragment)                                                                                                                                                                                                                                                                                                                                                                    | 187  | TMOD3  | 1  | 0 | 1  | 7.5  | 0    | 7.5  |
| 151 | -1.42 | 1.13  | 1.83 | P30050 | 60S ribosomal protein L12                                                                                                                                                                                                                                                                                                                                                                    | 165  | RPL12  | 3  | 4 | 3  | 24.2 | 35.8 | 26.1 |
| 152 | -1.42 | 0.00  | 0.00 | F8VUA7 | Oxysterol-binding protein (Fragment)                                                                                                                                                                                                                                                                                                                                                         | 694  | OSBPL8 | 1  | 0 | 0  | 1.6  | 0    | 0    |
| 153 | -1.42 | -0.60 | 0.59 | P00491 | Purine nucleoside phosphorylase (PNP) (EC 2.4.2.1) (Inosine phosphorylase) (Inosine-guanosine phosphorylase)                                                                                                                                                                                                                                                                                 | 289  | PNP    | 2  | 2 | 6  | 8.7  | 7.3  | 29.8 |
| 154 | -1.42 | 1.07  | 1.05 | Q9Y5M8 | Signal recognition particle receptor subunit beta (SR-beta) (Protein APMCF1)                                                                                                                                                                                                                                                                                                                 | 271  | SRPRB  | 1  | 3 | 1  | 7    | 17   | 5.9  |

|     |       |       |      |        |                                                                                                                                                                                                          |     |         |    |    |    |      |      |      |
|-----|-------|-------|------|--------|----------------------------------------------------------------------------------------------------------------------------------------------------------------------------------------------------------|-----|---------|----|----|----|------|------|------|
| 155 | -1.41 | 0.05  | 0.39 | Q14566 | DNA replication licensing factor MCM6 (EC 3.6.4.12) (p105MCM)                                                                                                                                            | 821 | MCM6    | 5  | 1  | 3  | 10.6 | 2.1  | 4.9  |
| 156 | -1.41 | 0.89  | 0.99 | J3QRD1 | Fatty aldehyde dehydrogenase                                                                                                                                                                             | 393 | ALDH3A2 | 7  | 4  | 6  | 23.7 | 13.2 | 20.4 |
| 157 | -1.40 | 0.48  | 1.23 | Q02878 | 60S ribosomal protein L6 (Neoplasm-related protein C140) (Tax-responsive enhancer element-binding protein 107) (TaxREB107)                                                                               | 288 | RPL6    | 4  | 2  | 4  | 16.3 | 8.7  | 14.2 |
| 158 | -1.40 | 1.01  | 1.45 | P41250 | Glycine--tRNA ligase (EC 6.1.1.14) (Diadenosine tetraphosphate synthetase) (AP-4-A synthetase) (Glycyl-tRNA synthetase) (GlyRS)                                                                          | 739 | GARS    | 5  | 1  | 5  | 9.3  | 1.5  | 11   |
| 159 | -1.39 | 0.65  | 1.52 | H0YEN5 | 40S ribosomal protein S2 (Fragment)                                                                                                                                                                      | 195 | RPS2    | 4  | 5  | 5  | 24.1 | 28.2 | 26.7 |
| 160 | -1.39 | 0.61  | 1.25 | Q5JP53 | Tubulin beta chain                                                                                                                                                                                       | 426 | TUBB    | 6  | 10 | 9  | 20.9 | 34.3 | 27.2 |
| 161 | -1.39 | 0.63  | 0.61 | P30153 | Serine/threonine-protein phosphatase 2A 65 kDa regulatory subunit A alpha isoform (Medium tumor antigen-associated 61 kDa protein) (PP2A subunit A isoform PR65-alpha) (PP2A subunit A isoform R1-alpha) | 589 | PPP2R1A | 4  | 2  | 2  | 9.7  | 5.3  | 5.1  |
| 162 | -1.39 | 1.20  | 0.90 | B4DJV2 | Citrate synthase                                                                                                                                                                                         | 453 | CS      | 5  | 2  | 5  | 9.7  | 4.4  | 9.5  |
| 163 | -1.38 | -0.02 | 0.78 | P11413 | Glucose-6-phosphate 1-dehydrogenase (G6PD) (EC 1.1.1.49)                                                                                                                                                 | 515 | G6PD    | 11 | 6  | 12 | 27   | 12.4 | 34.6 |
| 164 | -1.38 | 1.21  | 2.04 | Q9HDC9 | Adipocyte plasma membrane-associated protein (Protein BSCv)                                                                                                                                              | 416 | APMAP   | 3  | 4  | 2  | 14.2 | 19.7 | 11.4 |
| 165 | -1.38 | -0.24 | 0.90 | P46781 | 40S ribosomal protein S9                                                                                                                                                                                 | 194 | RPS9    | 3  | 3  | 3  | 15.5 | 11.9 | 11.9 |
| 166 | -1.38 | 0.00  | 0.00 | H7C286 | N-acetyl-D-glucosamine kinase                                                                                                                                                                            | 196 | NAGK    | 1  | 0  | 0  | 8.7  | 0    | 0    |

|     |       |      |      |        |                                                                                                                                                                                                                                                                                                                                                                                                                                                                                                                   |     |          |   |   |   |      |      |      |
|-----|-------|------|------|--------|-------------------------------------------------------------------------------------------------------------------------------------------------------------------------------------------------------------------------------------------------------------------------------------------------------------------------------------------------------------------------------------------------------------------------------------------------------------------------------------------------------------------|-----|----------|---|---|---|------|------|------|
| 167 | -1.37 | 0.54 | 1.78 | Q9NZI8 | Insulin-like growth factor 2 mRNA-binding protein 1 (IGF2 mRNA-binding protein 1) (IMP-1) (IMP1) (Coding region determinant-binding protein) (CRD-BP) (IGF-II mRNA-binding protein 1) (VICKZ family member 1) (Zipcode-binding protein 1) (ZBP-1)                                                                                                                                                                                                                                                                 | 577 | IGF2BP1  | 1 | 1 | 1 | 2.4  | 2.4  | 2.4  |
| 168 | -1.37 | 0.74 | 1.39 | P62913 | 60S ribosomal protein L11 (CLL-associated antigen KW-12)                                                                                                                                                                                                                                                                                                                                                                                                                                                          | 178 | RPL11    | 4 | 3 | 4 | 18.1 | 16.9 | 18.1 |
| 169 | -1.36 | 1.53 | 2.42 | P68036 | Ubiquitin-conjugating enzyme E2 L3 (EC 6.3.2.19) (L-UBC) (UbcH7) (Ubiquitin carrier protein L3) (Ubiquitin-conjugating enzyme E2-F1) (Ubiquitin-protein ligase L3)                                                                                                                                                                                                                                                                                                                                                | 154 | UBE2L3   | 1 | 2 | 2 | 7.4  | 19.7 | 19.7 |
| 170 | -1.36 | 1.38 | 1.53 | Q99714 | 3-hydroxyacyl-CoA dehydrogenase type-2 (EC 1.1.1.35) (17-beta-hydroxysteroid dehydrogenase 10) (17-beta-HSD 10) (EC 1.1.1.51) (3-hydroxy-2-methylbutyryl-CoA dehydrogenase) (EC 1.1.1.178) (3-hydroxyacyl-CoA dehydrogenase type II) (Endoplasmic reticulum-associated amyloid beta-peptide-binding protein) (Mitochondrial ribonuclease P protein 2) (Mitochondrial RNase P protein 2) (Short chain dehydrogenase/reductase family 5C member 1) (Short-chain type dehydrogenase/reductase XH98G2) (Type II HADH) | 261 | HSD17B10 | 5 | 7 | 9 | 33.7 | 51.3 | 51.7 |
| 171 | -1.36 | 2.04 | 1.27 | F8WAU4 | Elongation factor G, mitochondrial                                                                                                                                                                                                                                                                                                                                                                                                                                                                                | 453 | GFM1     | 1 | 1 | 1 | 2.4  | 2.4  | 2.4  |
| 172 | -1.36 | 0.00 | 0.00 | Q6PIU2 | Neutral cholesterol ester hydrolase 1 (NCEH) (EC 3.1.1.-) (Arylacetamide deacetylase-like 1)                                                                                                                                                                                                                                                                                                                                                                                                                      | 408 | NCEH1    | 1 | 0 | 0 | 5.8  | 0    | 0    |

|     |       |       |       |        |                                                                                                                                                                                                                                                                 |     |           |   |   |   |      |      |      |
|-----|-------|-------|-------|--------|-----------------------------------------------------------------------------------------------------------------------------------------------------------------------------------------------------------------------------------------------------------------|-----|-----------|---|---|---|------|------|------|
| 173 | -1.35 | -0.56 | 0.00  | Q9H8S9 | MOB kinase activator 1A (Mob1 alpha) (Mob1A) (Mob1 homolog 1B) (Mps one binder kinase activator-like 1B)                                                                                                                                                        | 216 | MOB1A     | 1 | 1 | 1 | 5.1  | 5.6  | 5.1  |
| 174 | -1.35 | 1.74  | 1.34  | Q15084 | Protein disulfide-isomerase A6 (EC 5.3.4.1) (Endoplasmic reticulum protein 5) (ER protein 5) (ERp5) (Protein disulfide isomerase P5) (Thioredoxin domain-containing protein 7)                                                                                  | 440 | PDIA6     | 6 | 6 | 7 | 21.5 | 20.4 | 25.4 |
| 175 | -1.35 | 1.20  | 0.46  | Q53GQ0 | Very-long-chain 3-oxoacyl-CoA reductase (EC 1.1.1.330) (17-beta-hydroxysteroid dehydrogenase 12) (17-beta-HSD 12) (3-ketoacyl-CoA reductase) (KAR) (Estradiol 17-beta-dehydrogenase 12) (EC 1.1.1.62) (Short chain dehydrogenase/reductase family 12C member 1) | 312 | HSD17B12  | 2 | 5 | 2 | 9.3  | 17   | 9.6  |
| 176 | -1.34 | 0.42  | 1.69  | H0YA96 | Heterogeneous nuclear ribonucleoprotein D0 (Fragment)                                                                                                                                                                                                           | 210 | HNRNPD    | 3 | 3 | 3 | 15.2 | 12.4 | 15.2 |
| 177 | -1.33 | 0.00  | -0.08 | G3V158 | 2-deoxyribose-5-phosphate aldolase homolog (C. elegans), isoform CRA_a (Deoxyribose-phosphate aldolase)                                                                                                                                                         | 230 | DERA      | 1 | 0 | 1 | 6.5  | 0    | 5.2  |
| 178 | -1.33 | 0.23  | 0.83  | P62750 | 60S ribosomal protein L23a                                                                                                                                                                                                                                      | 156 | RPL23A    | 4 | 4 | 4 | 20.5 | 19.2 | 18.6 |
| 179 | -1.33 | 0.63  | 1.11  | Q58FF8 | Putative heat shock protein HSP 90-beta 2 (Heat shock protein 90-beta b) (Heat shock protein 90Bb)                                                                                                                                                              | 381 | HSP90AB2P | 8 | 4 | 8 | 19.7 | 11.3 | 19.7 |
| 180 | -1.32 | 0.07  | 0.61  | P62937 | Peptidyl-prolyl cis-trans isomerase A (PPIase A) (EC 5.2.1.8) (Cyclophilin A) (Cyclosporin A-binding protein) (Rotamase A) [Cleaved into: Peptidyl-prolyl cis-trans isomerase A, N-terminally processed]                                                        | 165 | PPIA      | 9 | 9 | 7 | 43   | 38.8 | 33.9 |

|     |       |       |       |        |                                                                                                                                                                                                                                 |     |        |   |   |   |      |      |      |
|-----|-------|-------|-------|--------|---------------------------------------------------------------------------------------------------------------------------------------------------------------------------------------------------------------------------------|-----|--------|---|---|---|------|------|------|
| 181 | -1.32 | 0.31  | 1.12  | P54136 | Arginine--tRNA ligase, cytoplasmic (EC 6.1.1.19) (Arginyl-tRNA synthetase) (ArgRS)                                                                                                                                              | 660 | RARS   | 5 | 4 | 4 | 10.4 | 8    | 8.2  |
| 182 | -1.32 | -0.05 | 0.76  | Q07020 | 60S ribosomal protein L18                                                                                                                                                                                                       | 188 | RPL18  | 2 | 2 | 1 | 13.2 | 15.1 | 6.9  |
| 183 | -1.32 | 2.41  | 0.00  | K9J7I2 | Uncharacterized protein                                                                                                                                                                                                         | 107 |        | 1 | 2 | 0 | 17.8 | 19.6 | 0    |
| 184 | -1.32 | 1.21  | 0.00  | C9J6B1 | Ras-related protein Ral-B (Fragment)                                                                                                                                                                                            | 167 | RALB   | 1 | 1 | 0 | 9.6  | 9.6  | 0    |
| 185 | -1.32 | 1.59  | 1.74  | O75947 | ATP synthase subunit d, mitochondrial (ATPase subunit d)                                                                                                                                                                        | 161 | ATP5H  | 2 | 7 | 4 | 19.3 | 41   | 32.3 |
| 186 | -1.31 | 0.00  | 0.00  | P55957 | BH3-interacting domain death agonist (p22 BID) (BID) [Cleaved into: BH3-interacting domain death agonist p15 (p15 BID); BH3-interacting domain death agonist p13 (p13 BID); BH3-interacting domain death agonist p11 (p11 BID)] | 195 | BID    | 1 | 1 | 0 | 15.2 | 15.2 | 0    |
| 187 | -1.31 | 1.42  | 1.30  | Q15029 | 116 kDa U5 small nuclear ribonucleoprotein component (Elongation factor Tu GTP-binding domain-containing protein 2) (SNU114 homolog) (hSNU114) (U5 snRNP-specific protein, 116 kDa) (U5-116 kDa)                                | 972 | EFTUD2 | 3 | 3 | 5 | 4.3  | 3.9  | 7.3  |
| 188 | -1.30 | -0.30 | 0.81  | P00390 | Glutathione reductase, mitochondrial (GR) (GRase) (EC 1.8.1.7)                                                                                                                                                                  | 522 | GSR    | 6 | 1 | 8 | 20.7 | 2.3  | 21.9 |
| 189 | -1.30 | 1.52  | 1.90  | Q9NR30 | Nucleolar RNA helicase 2 (EC 3.6.4.13) (DEAD box protein 21) (Gu-alpha) (Nucleolar RNA helicase Gu) (Nucleolar RNA helicase II) (RH II/Gu)                                                                                      | 783 | DDX21  | 3 | 1 | 4 | 4.6  | 1.5  | 6.2  |
| 190 | -1.30 | 0.03  | -0.97 | P47897 | Glutamine--tRNA ligase (EC 6.1.1.18) (Glutaminyl-tRNA synthetase) (GlnRS)                                                                                                                                                       | 775 | QARS   | 5 | 1 | 1 | 7.7  | 2.1  | 2.1  |
| 191 | -1.30 | 0.65  | 0.52  | P49368 | T-complex protein 1 subunit gamma (TCP-1-gamma) (CCT-gamma) (hTRiC5)                                                                                                                                                            | 545 | CCT3   | 9 | 3 | 5 | 17.6 | 6.2  | 8.4  |

|     |       |       |       |        |                                                                                                                                                                                                                                                                                                                                                              |      |        |    |   |   |      |      |      |
|-----|-------|-------|-------|--------|--------------------------------------------------------------------------------------------------------------------------------------------------------------------------------------------------------------------------------------------------------------------------------------------------------------------------------------------------------------|------|--------|----|---|---|------|------|------|
| 192 | -1.30 | 2.06  | 1.36  | P23246 | Splicing factor, proline- and glutamine-rich (100 kDa DNA-pairing protein) (hPOMp100) (DNA-binding p52/p100 complex, 100 kDa subunit) (Polypyrimidine tract-binding protein-associated-splicing factor) (PSF) (PTB-associated-splicing factor)                                                                                                               | 707  | SFPQ   | 1  | 4 | 2 | 2.4  | 9.6  | 5.1  |
| 193 | -1.29 | 0.84  | 1.29  | Q9HB71 | Calcyclin-binding protein (CacyBP) (hCacyBP) (S100A6-binding protein) (Siah-interacting protein)                                                                                                                                                                                                                                                             | 228  | CACYBP | 6  | 3 | 6 | 40.4 | 17.1 | 36   |
| 194 | -1.29 | -0.36 | -0.11 | Q7Z6Z7 | E3 ubiquitin-protein ligase HUWE1 (EC 6.3.2.-) (ARF-binding protein 1) (ARF-BP1) (HECT, UBA and WWE domain-containing protein 1) (Homologous to E6AP carboxyl terminus homologous protein 9) (HectH9) (Large structure of UREB1) (LASU1) (Mcl-1 ubiquitin ligase E3) (Mule) (Upstream regulatory element-binding protein 1) (URE-B1) (URE-binding protein 1) | 4374 | HUWE1  | 2  | 1 | 1 | 0.8  | 0.3  | 0.3  |
| 195 | -1.29 | -0.29 | 0.94  | Q99497 | Protein deglycase DJ-1 (DJ-1) (EC 3.1.2.-) (EC 3.5.1.-) (Oncogene DJ1) (Parkinson disease protein 7)                                                                                                                                                                                                                                                         | 189  | PARK7  | 10 | 6 | 9 | 68.8 | 36   | 50.8 |
| 196 | -1.29 | 1.34  | 0.87  | M0R3D4 | Prenylated Rab acceptor protein 1 (Rab acceptor 1 (Prenylated), isoform CRA_a)                                                                                                                                                                                                                                                                               | 151  | RABAC1 | 1  | 1 | 1 | 9.9  | 9.9  | 9.9  |
| 197 | -1.29 | 0.00  | 2.91  | P35637 | RNA-binding protein FUS (75 kDa DNA-pairing protein) (Oncogene FUS) (Oncogene TLS) (POMp75) (Translocated in liposarcoma protein)                                                                                                                                                                                                                            | 526  | FUS    | 2  | 0 | 1 | 5.3  | 0    | 3    |

|     |       |      |      |        |                                                                                                                                                                                                                                                                                                                                                                           |     |        |   |   |    |      |      |      |
|-----|-------|------|------|--------|---------------------------------------------------------------------------------------------------------------------------------------------------------------------------------------------------------------------------------------------------------------------------------------------------------------------------------------------------------------------------|-----|--------|---|---|----|------|------|------|
| 198 | -1.29 | 0.00 | 0.62 | P20042 | Eukaryotic translation initiation factor 2 subunit 2 (Eukaryotic translation initiation factor 2 subunit beta) (eIF-2-beta)                                                                                                                                                                                                                                               | 333 | EIF2S2 | 1 | 0 | 1  | 4.5  | 0    | 4.5  |
| 199 | -1.29 | 0.24 | 0.77 | P41567 | Eukaryotic translation initiation factor 1 (eIF1) (A121) (Protein translation factor SUI1 homolog) (Sui1 iso1)                                                                                                                                                                                                                                                            | 113 | EIF1   | 1 | 4 | 1  | 15   | 53.1 | 14.2 |
| 200 | -1.29 | 0.90 | 0.79 | Q9UQ80 | Proliferation-associated protein 2G4 (Cell cycle protein p38-2G4 homolog) (hG4-1) (ErbB3-binding protein 1)                                                                                                                                                                                                                                                               | 394 | PA2G4  | 4 | 6 | 5  | 11.9 | 21.6 | 16.2 |
| 201 | -1.29 | 0.03 | 0.91 | Q04828 | Aldo-keto reductase family 1 member C1 (EC 1.1.1.-) (20-alpha-hydroxysteroid dehydrogenase) (20-alpha-HSD) (EC 1.1.1.149) (Chlordecone reductase homolog HAKRC) (Dihydrodiol dehydrogenase 1/2) (DD1/DD2) (High-affinity hepatic bile acid-binding protein) (HBAB) (Indanol dehydrogenase) (EC 1.1.1.112) (Trans-1,2-dihydrobenzene-1,2-diol dehydrogenase) (EC 1.3.1.20) | 323 | AKR1C1 | 8 | 9 | 10 | 39.6 | 43.3 | 49.2 |
| 202 | -1.29 | 0.00 | 0.00 | A2A2U4 | Ribosyldihyronicotinamide dehydrogenase [quinone] (Fragment)                                                                                                                                                                                                                                                                                                              | 63  | NQO2   | 1 | 0 | 0  | 17.5 | 0    | 0    |
| 203 | -1.28 | 1.13 | 0.00 | Q8NC51 | Plasminogen activator inhibitor 1 RNA-binding protein (PAI1 RNA-binding protein 1) (PAI-RBP1) (SERPINE1 mRNA-binding protein 1)                                                                                                                                                                                                                                           | 408 | SERBP1 | 1 | 1 | 0  | 4.1  | 2.3  | 0    |
| 204 | -1.27 | 0.41 | 0.91 | P56537 | Eukaryotic translation initiation factor 6 (eIF-6) (B(2)GCN homolog) (B4 integrin interactor) (CAB) (p27(BBP))                                                                                                                                                                                                                                                            | 245 | EIF6   | 4 | 5 | 5  | 31.4 | 33.5 | 30.6 |



|     |       |       |      |        |                                                                                                                                                                                                                                            |      |        |   |   |   |      |      |      |
|-----|-------|-------|------|--------|--------------------------------------------------------------------------------------------------------------------------------------------------------------------------------------------------------------------------------------------|------|--------|---|---|---|------|------|------|
| 205 | -1.27 | -0.12 | 0.97 | Q9ULC4 | Malignant T-cell-amplified sequence 1 (MCT-1) (Multiple copies T-cell malignancies)                                                                                                                                                        | 181  | MCTS1  | 2 | 2 | 1 | 19.9 | 14.9 | 9.4  |
| 206 | -1.25 | 0.00  | 0.00 | A8MXH2 | Nucleosome assembly protein 1-like 4 (Fragment)                                                                                                                                                                                            | 156  | NAP1L4 | 1 | 0 | 0 | 11.5 | 0    | 0    |
| 207 | -1.23 | 0.00  | 1.78 | E9PR16 | Nuclear pore complex protein Nup160 (Fragment)                                                                                                                                                                                             | 1123 | NUP160 | 1 | 0 | 1 | 1.1  | 0    | 1.1  |
| 208 | -1.23 | 0.44  | 1.58 | P41252 | Isoleucine--tRNA ligase, cytoplasmic (EC 6.1.1.5) (Isoleucyl-tRNA synthetase) (IRS) (IleRS)                                                                                                                                                | 1262 | IARS   | 1 | 5 | 1 | 1    | 4.8  | 1    |
| 209 | -1.22 | 0.47  | 1.05 | Q96Q11 | CCA tRNA nucleotidyltransferase 1, mitochondrial (EC 2.7.7.72) (Mitochondrial tRNA nucleotidyl transferase, CCA-adding) (mt CCA-adding enzyme) (mt tRNA CCA-diphosphorylase) (mt tRNA CCA-pyrophosphorylase) (mt tRNA adenylyltransferase) | 434  | TRNT1  | 1 | 1 | 1 | 2.4  | 2.4  | 2.4  |
| 210 | -1.21 | 1.21  | 1.47 | P60866 | 40S ribosomal protein S20                                                                                                                                                                                                                  | 119  | RPS20  | 2 | 2 | 1 | 22.7 | 19.3 | 12.6 |
| 211 | -1.21 | -0.03 | 0.04 | Q9NQR4 | Omega-amidase NIT2 (EC 3.5.1.3) (Nitrilase homolog 2)                                                                                                                                                                                      | 276  | NIT2   | 4 | 4 | 2 | 19.9 | 23.9 | 10.1 |
| 212 | -1.21 | 0.17  | 0.00 | Q13283 | Ras GTPase-activating protein-binding protein 1 (G3BP-1) (EC 3.6.4.12) (EC 3.6.4.13) (ATP-dependent DNA helicase VIII) (hDH VIII) (GAP SH3 domain-binding protein 1)                                                                       | 466  | G3BP1  | 2 | 1 | 0 | 7.1  | 3.6  | 0    |
| 213 | -1.21 | -0.17 | 0.00 | Q14691 | DNA replication complex GINS protein PSF1 (GINS complex subunit 1)                                                                                                                                                                         | 196  | GINS1  | 1 | 1 | 0 | 7.7  | 7.1  | 0    |

|     |       |      |      |        |                                                                                                                                                                                                                                                                                                                                                                                                  |     |        |   |   |   |      |      |      |
|-----|-------|------|------|--------|--------------------------------------------------------------------------------------------------------------------------------------------------------------------------------------------------------------------------------------------------------------------------------------------------------------------------------------------------------------------------------------------------|-----|--------|---|---|---|------|------|------|
| 214 | -1.21 | 1.45 | 2.14 | P07858 | Cathepsin B (EC 3.4.22.1) (APP secretase) (APPS) (Cathepsin B1) [Cleaved into: Cathepsin B light chain; Cathepsin B heavy chain]                                                                                                                                                                                                                                                                 | 339 | CTSB   | 2 | 5 | 2 | 10.3 | 20.6 | 8.3  |
| 215 | -1.21 | 0.60 | 1.13 | Q02790 | Peptidyl-prolyl cis-trans isomerase FKBP4 (PPIase FKBP4) (EC 5.2.1.8) (51 kDa FK506-binding protein) (FKBP51) (52 kDa FK506-binding protein) (52 kDa FKBP) (FKBP-52) (59 kDa immunophilin) (p59) (FK506-binding protein 4) (FKBP-4) (FKBP59) (HSP-binding immunophilin) (HBI) (Immunophilin FKBP52) (Rotamase) [Cleaved into: Peptidyl-prolyl cis-trans isomerase FKBP4, N-terminally processed] | 459 | FKBP4  | 2 | 2 | 6 | 6.1  | 5.7  | 20   |
| 216 | -1.20 | 0.20 | 0.78 | P09211 | Glutathione S-transferase P (EC 2.5.1.18) (GST class-pi) (GSTP1-1)                                                                                                                                                                                                                                                                                                                               | 210 | GSTP1  | 1 | 4 | 1 | 4.8  | 26.7 | 4.8  |
| 217 | -1.20 | 0.13 | 0.00 | A6NDF3 | Protein PBDC1                                                                                                                                                                                                                                                                                                                                                                                    | 232 | PBDC1  | 1 | 2 | 0 | 6.5  | 11.2 | 0    |
| 218 | -1.19 | 1.12 | 0.00 | P00387 | NADH-cytochrome b5 reductase 3 (B5R) (Cytochrome b5 reductase) (EC 1.6.2.2) (Diaphorase-1) [Cleaved into: NADH-cytochrome b5 reductase 3 membrane-bound form; NADH-cytochrome b5 reductase 3 soluble form]                                                                                                                                                                                       | 301 | CYB5R3 | 2 | 2 | 0 | 8.6  | 8.3  | 0    |
| 219 | -1.19 | 0.43 | 0.93 | P09960 | Leukotriene A-4 hydrolase (LTA-4 hydrolase) (EC 3.3.2.6) (Leukotriene A(4) hydrolase)                                                                                                                                                                                                                                                                                                            | 611 | LTA4H  | 5 | 1 | 3 | 9.7  | 1.9  | 5.6  |
| 220 | -1.18 | 0.98 | 1.18 | H0YHC3 | Nucleosome assembly protein 1-like 1 (Fragment)                                                                                                                                                                                                                                                                                                                                                  | 198 | NAP1L1 | 3 | 2 | 4 | 20.7 | 14.1 | 29.3 |
| 221 | -1.18 | 0.20 | 1.24 | D3YTB1 | 60S ribosomal protein L32 (Fragment)                                                                                                                                                                                                                                                                                                                                                             | 133 | RPL32  | 6 | 2 | 5 | 30.1 | 20.3 | 36.8 |
| 222 | -1.18 | 0.96 | 1.37 | P62318 | Small nuclear ribonucleoprotein Sm D3 (Sm-D3) (snRNP core protein D3)                                                                                                                                                                                                                                                                                                                            | 126 | SNRPD3 | 2 | 2 | 2 | 13.3 | 13.3 | 13.3 |

|     |       |      |      |        |                                                                                                                                                                                                                                                                                                                                                                                                                                                                                    |     |        |    |    |    |      |      |      |
|-----|-------|------|------|--------|------------------------------------------------------------------------------------------------------------------------------------------------------------------------------------------------------------------------------------------------------------------------------------------------------------------------------------------------------------------------------------------------------------------------------------------------------------------------------------|-----|--------|----|----|----|------|------|------|
| 223 | -1.17 | 1.15 | 0.98 | P08195 | 4F2 cell-surface antigen heavy chain (4F2hc) (4F2 heavy chain antigen) (Lymphocyte activation antigen 4F2 large subunit) (Solute carrier family 3 member 2) (CD antigen CD98)                                                                                                                                                                                                                                                                                                      | 630 | SLC3A2 | 13 | 14 | 12 | 32.4 | 31.2 | 27.1 |
| 224 | -1.17 | 1.11 | 1.09 | P13010 | X-ray repair cross-complementing protein 5 (EC 3.6.4.-) (86 kDa subunit of Ku antigen) (ATP-dependent DNA helicase 2 subunit 2) (ATP-dependent DNA helicase II 80 kDa subunit) (CTC box-binding factor 85 kDa subunit) (CTC85) (CTCBF) (DNA repair protein XRCC5) (Ku80) (Ku86) (Lupus Ku autoantigen protein p86) (Nuclear factor IV) (Thyroid-lupus autoantigen) (TLAA) (X-ray repair complementing defective repair in Chinese hamster cells 5 (double-strand-break rejoining)) | 732 | XRCC5  | 8  | 7  | 9  | 14.6 | 12.2 | 13.5 |
| 225 | -1.17 | 1.14 | 2.25 | Q15758 | Neutral amino acid transporter B(0) (ATB(0)) (Baboon M7 virus receptor) (RD114/simian type D retrovirus receptor) (Sodium-dependent neutral amino acid transporter type 2) (Solute carrier family 1 member 5)                                                                                                                                                                                                                                                                      | 541 | SLC1A5 | 2  | 1  | 3  | 4.3  | 2.4  | 7.9  |
| 226 | -1.16 | 1.34 | 1.32 | P63261 | Actin, cytoplasmic 2 (Gamma-actin) [Cleaved into: Actin, cytoplasmic 2, N-terminally processed]                                                                                                                                                                                                                                                                                                                                                                                    | 375 | ACTG1  | 13 | 18 | 12 | 51.2 | 67.2 | 47.5 |
| 227 | -1.16 | 1.75 | 1.74 | P36578 | 60S ribosomal protein L4 (60S ribosomal protein L1)                                                                                                                                                                                                                                                                                                                                                                                                                                | 427 | RPL4   | 6  | 1  | 7  | 16.6 | 3.7  | 21.1 |
| 228 | -1.15 | 0.00 | 0.00 | Q2TAA2 | Isoamyl acetate-hydrolyzing esterase 1 homolog (EC 3.1.-.-)                                                                                                                                                                                                                                                                                                                                                                                                                        | 248 | IAH1   | 1  | 0  | 0  | 12.6 | 0    | 0    |

|     |       |       |       |        |                                                                                                                                                                                                                                                                      |     |         |    |   |    |      |      |      |
|-----|-------|-------|-------|--------|----------------------------------------------------------------------------------------------------------------------------------------------------------------------------------------------------------------------------------------------------------------------|-----|---------|----|---|----|------|------|------|
| 229 | -1.15 | -0.13 | 0.28  | P06744 | Glucose-6-phosphate isomerase (GPI) (EC 5.3.1.9) (Autocrine motility factor) (AMF) (Neuroleukin) (NLK) (Phosphoglucose isomerase) (PGI) (Phosphohexose isomerase) (PHI) (Sperm antigen 36) (SA-36)                                                                   | 558 | GPI     | 7  | 5 | 4  | 15.9 | 11.5 | 8.4  |
| 230 | -1.15 | 0.00  | 0.00  | Q13618 | Cullin-3 (CUL-3)                                                                                                                                                                                                                                                     | 768 | CUL3    | 1  | 0 | 1  | 1.3  | 0    | 1.5  |
| 231 | -1.15 | 0.00  | 0.00  | C9J255 | Mannose-1-phosphate guanyltransferase alpha (Fragment)                                                                                                                                                                                                               | 179 | GMPPA   | 1  | 0 | 0  | 5.6  | 0    | 0    |
| 232 | -1.15 | 0.00  | 0.96  | C9IZG3 | Ubiquitin fusion degradation protein 1 homolog (Fragment)                                                                                                                                                                                                            | 190 | UFD1L   | 2  | 0 | 1  | 12.1 | 0    | 5.3  |
| 233 | -1.15 | 0.09  | 0.41  | Q14847 | LIM and SH3 domain protein 1 (LASP-1) (Metastatic lymph node gene 50 protein) (MLN 50)                                                                                                                                                                               | 261 | LASP1   | 1  | 5 | 1  | 5    | 19.9 | 3.4  |
| 234 | -1.14 | -0.16 | -0.30 | A2A2D0 | Stathmin (Fragment)                                                                                                                                                                                                                                                  | 85  | STMN1   | 3  | 3 | 1  | 42.4 | 35.3 | 10.6 |
| 235 | -1.14 | 0.58  | 1.04  | P05388 | 60S acidic ribosomal protein P0 (60S ribosomal protein L10E)                                                                                                                                                                                                         | 317 | RPLP0   | 10 | 8 | 11 | 45.4 | 32.8 | 47.3 |
| 236 | -1.14 | -0.29 | 1.15  | Q5W0S5 | UV excision repair protein RAD23 homolog B (Fragment)                                                                                                                                                                                                                | 146 | RAD23B  | 1  | 2 | 1  | 7.5  | 13   | 7.5  |
| 237 | -1.14 | 1.75  | 0.00  | Q01650 | Large neutral amino acids transporter small subunit 1 (4F2 light chain) (4F2 LC) (4F2LC) (CD98 light chain) (Integral membrane protein E16) (L-type amino acid transporter 1) (hLAT1) (Solute carrier family 7 member 5) (y+ system cationic amino acid transporter) | 507 | SLC7A5  | 1  | 3 | 1  | 3.6  | 7.1  | 1.8  |
| 238 | -1.14 | 0.00  | 0.98  | A6NJA2 | Ubiquitin carboxyl-terminal hydrolase (EC 3.4.19.12)                                                                                                                                                                                                                 | 448 | USP14   | 2  | 0 | 1  | 5.4  | 0    | 2.5  |
| 239 | -1.14 | 0.00  | 1.06  | C9JVE2 | DCN1-like protein (Defective in cullin neddylation protein 1-like protein)                                                                                                                                                                                           | 244 | DCUN1D1 | 2  | 0 | 1  | 12.3 | 0    | 5.3  |

|     |       |      |      |            |                                                                                                                                                                                                                                                                                                 |     |        |    |    |    |      |      |      |
|-----|-------|------|------|------------|-------------------------------------------------------------------------------------------------------------------------------------------------------------------------------------------------------------------------------------------------------------------------------------------------|-----|--------|----|----|----|------|------|------|
| 240 | -1.14 | 0.00 | 0.00 | P23381     | Tryptophan--tRNA ligase, cytoplasmic (EC 6.1.1.2) (Interferon-induced protein 53) (IFP53) (Tryptophanyl-tRNA synthetase) (TrpRS) (hWRS) [Cleaved into: T1-TrpRS; T2-TrpRS]                                                                                                                      | 471 | WARS   | 2  | 0  | 0  | 8.3  | 0    | 0    |
| 241 | -1.13 | 0.00 | 0.81 | A0A087WW66 | 26S proteasome non-ATPase regulatory subunit 1                                                                                                                                                                                                                                                  | 953 | PSMD1  | 5  | 0  | 5  | 8    | 0    | 7    |
| 242 | -1.13 | 0.94 | 1.65 | P19338     | Nucleolin (Protein C23)                                                                                                                                                                                                                                                                         | 710 | NCL    | 12 | 10 | 10 | 18.5 | 17.2 | 16.8 |
| 243 | -1.13 | 0.76 | 1.35 | Q15365     | Poly(rC)-binding protein 1 (Alpha-CPI) (Heterogeneous nuclear ribonucleoprotein E1) (hnRNP E1) (Nucleic acid-binding protein SUB2.3)                                                                                                                                                            | 356 | PCBP1  | 1  | 3  | 2  | 7    | 10.7 | 9.3  |
| 244 | -1.12 | 1.72 | 1.74 | Q3ZCQ8     | Mitochondrial import inner membrane translocase subunit TIM50                                                                                                                                                                                                                                   | 353 | TIMM50 | 3  | 3  | 3  | 12.2 | 12.2 | 12.2 |
| 245 | -1.12 | 0.53 | 0.94 | P31939     | Bifunctional purine biosynthesis protein PURH [Includes: Phosphoribosylaminoimidazolecarboxamide formyltransferase (EC 2.1.2.3) (5-aminoimidazole-4-carboxamide ribonucleotide formyltransferase) (AICAR transformylase); IMP cyclohydrolase (EC 3.5.4.10) (ATIC) (IMP synthase) (Inosinicase)] | 592 | ATIC   | 13 | 4  | 10 | 27   | 10.5 | 21.3 |
| 246 | -1.12 | 2.27 | 1.57 | A0A0A0MTN9 | NADPH:adenodoxin oxidoreductase, mitochondrial (EC 1.18.1.6)                                                                                                                                                                                                                                    | 439 | FDXR   | 1  | 2  | 5  | 3.2  | 5.7  | 16.9 |
| 247 | -1.12 | 0.00 | 0.00 | D6R918     | OCIA domain-containing protein 1 (Fragment)                                                                                                                                                                                                                                                     | 73  | OCIAD1 | 1  | 0  | 0  | 24.7 | 0    | 0    |
| 248 | -1.12 | 1.01 | 1.07 | P17812     | CTP synthase 1 (EC 6.3.4.2) (CTP synthetase 1) (UTP--ammonia ligase 1)                                                                                                                                                                                                                          | 591 | CTPS1  | 2  | 1  | 2  | 3.4  | 2.7  | 5.1  |
| 249 | -1.12 | 1.42 | 1.13 | J3QS48     | Mannose-P-dolichol utilization defect 1 protein                                                                                                                                                                                                                                                 | 101 | MPDU1  | 2  | 2  | 2  | 23.8 | 23.8 | 23.8 |

|     |       |       |      |        |                                                                                                                                                                                                                                                                                                                                                                                    |     |        |   |   |   |      |      |      |
|-----|-------|-------|------|--------|------------------------------------------------------------------------------------------------------------------------------------------------------------------------------------------------------------------------------------------------------------------------------------------------------------------------------------------------------------------------------------|-----|--------|---|---|---|------|------|------|
| 250 | -1.11 | 0.99  | 1.05 | Q9H3N1 | Thioredoxin-related transmembrane protein 1 (Thioredoxin domain-containing protein 1) (Transmembrane Trx-related protein)                                                                                                                                                                                                                                                          | 280 | TMX1   | 2 | 6 | 3 | 8.2  | 20.7 | 11.4 |
| 251 | -1.11 | -0.06 | 0.79 | P46778 | 60S ribosomal protein L21                                                                                                                                                                                                                                                                                                                                                          | 160 | RPL21  | 2 | 2 | 1 | 16.2 | 13.8 | 9.4  |
| 252 | -1.11 | -0.25 | 0.24 | O60493 | Sorting nexin-3 (Protein SDP3)                                                                                                                                                                                                                                                                                                                                                     | 162 | SNX3   | 3 | 3 | 2 | 16   | 10.5 | 10.5 |
| 253 | -1.10 | 0.00  | 0.00 | P61966 | AP-1 complex subunit sigma-1A (Adaptor protein complex AP-1 subunit sigma-1A) (Adaptor-related protein complex 1 subunit sigma-1A) (Clathrin assembly protein complex 1 sigma-1A small chain) (Clathrin coat assembly protein AP19) (Golgi adaptor HA1/AP1 adaptin sigma-1A subunit) (HA1 19 kDa subunit) (Sigma 1a subunit of AP-1 clathrin) (Sigma-adaptin 1A) (Sigma1A-adaptin) | 158 | AP1S1  | 1 | 0 | 0 | 10.1 | 0    | 0    |
| 254 | -1.10 | 1.64  | 0.99 | Q9NYL4 | Peptidyl-prolyl cis-trans isomerase FKBP11 (PPIase FKBP11) (EC 5.2.1.8) (19 kDa FK506-binding protein) (19 kDa FKBP) (FKBP-19) (FK506-binding protein 11) (FKBP-11) (Rotamase)                                                                                                                                                                                                     | 201 | FKBP11 | 1 | 2 | 1 | 7.5  | 14.4 | 6.8  |
| 255 | -1.10 | -0.20 | 0.14 | H0YJG7 | Activator of 90 kDa heat shock protein ATPase homolog 1 (Fragment)                                                                                                                                                                                                                                                                                                                 | 216 | AHSA1  | 2 | 1 | 1 | 15.3 | 5.1  | 5.1  |
| 256 | -1.10 | 0.73  | 1.41 | H0Y8E6 | DNA replication licensing factor MCM2 (Fragment)                                                                                                                                                                                                                                                                                                                                   | 836 | MCM2   | 4 | 3 | 1 | 6.1  | 4.4  | 1.4  |
| 257 | -1.09 | 0.58  | 1.21 | P55145 | Mesencephalic astrocyte-derived neurotrophic factor (Arginine-rich protein) (Protein ARMET)                                                                                                                                                                                                                                                                                        | 182 | MANF   | 2 | 4 | 3 | 18.7 | 19.8 | 24.7 |

|     |       |      |      |        |                                                                                                                                                                                       |      |          |    |    |    |      |      |      |
|-----|-------|------|------|--------|---------------------------------------------------------------------------------------------------------------------------------------------------------------------------------------|------|----------|----|----|----|------|------|------|
| 258 | -1.09 | 0.46 | 0.79 | Q14204 | Cytoplasmic dynein 1 heavy chain 1 (Cytoplasmic dynein heavy chain 1) (Dynein heavy chain, cytosolic)                                                                                 | 4646 | DYNC1H1  | 6  | 30 | 29 | 2.3  | 8.3  | 8.1  |
| 259 | -1.09 | 1.66 | 1.18 | P05023 | Sodium/potassium-transporting ATPase subunit alpha-1 (Na(+)/K(+) ATPase alpha-1 subunit) (EC 3.6.3.9) (Sodium pump subunit alpha-1)                                                   | 1023 | ATP1A1   | 4  | 4  | 6  | 6    | 5.2  | 7.4  |
| 260 | -1.09 | 0.00 | 0.70 | P04075 | Fructose-bisphosphate aldolase A (EC 4.1.2.13) (Lung cancer antigen NY-LU-1) (Muscle-type aldolase)                                                                                   | 364  | ALDOA    | 7  | 9  | 7  | 28.8 | 30.5 | 31.3 |
| 261 | -1.08 | 0.00 | 0.00 | P55263 | Adenosine kinase (AK) (EC 2.7.1.20) (Adenosine 5'-phosphotransferase)                                                                                                                 | 362  | ADK      | 1  | 0  | 0  | 4.9  | 0    | 0    |
| 262 | -1.08 | 0.00 | 1.09 | I3L4U9 | Nuclear protein localization protein 4 homolog                                                                                                                                        | 135  | NPLOC4   | 1  | 0  | 1  | 13.3 | 0    | 13.3 |
| 263 | -1.08 | 0.00 | 3.58 | Q96AE4 | Far upstream element-binding protein 1 (FBP) (FUSE-binding protein 1) (DNA helicase V) (hDH V)                                                                                        | 644  | FUBP1    | 1  | 0  | 1  | 1.9  | 0    | 4    |
| 264 | -1.08 | 1.74 | 1.78 | H0YLR3 | U2 small nuclear ribonucleoprotein A' (Fragment)                                                                                                                                      | 89   | SNRPA1   | 1  | 1  | 1  | 12.4 | 13.5 | 13.5 |
| 265 | -1.08 | 0.75 | 0.71 | Q9Y277 | Voltage-dependent anion-selective channel protein 3 (VDAC-3) (hVDAC3) (Outer mitochondrial membrane protein porin 3)                                                                  | 283  | VDAC3    | 3  | 4  | 3  | 8.8  | 16.3 | 17   |
| 266 | -1.07 | 1.27 | 0.00 | H0YLA2 | Signal recognition particle 14 kDa protein                                                                                                                                            | 115  | SRP14    | 1  | 1  | 0  | 11.3 | 11.3 | 0    |
| 267 | -1.07 | 0.39 | 0.76 | P07900 | Heat shock protein HSP 90-alpha (Heat shock 86 kDa) (HSP 86) (HSP86) (Lipopolysaccharide-associated protein 2) (LAP-2) (LPS-associated protein 2) (Renal carcinoma antigen NY-REN-38) | 732  | HSP90AA1 | 29 | 14 | 25 | 37.3 | 24.2 | 32.1 |

|     |       |      |       |        |                                                                                                                                                                                                     |      |        |   |   |   |      |      |      |
|-----|-------|------|-------|--------|-----------------------------------------------------------------------------------------------------------------------------------------------------------------------------------------------------|------|--------|---|---|---|------|------|------|
| 268 | -1.06 | 0.51 | 0.92  | P48507 | Glutamate--cysteine ligase regulatory subunit (GCS light chain) (Gamma-ECS regulatory subunit) (Gamma-glutamylcysteine synthetase regulatory subunit) (Glutamate--cysteine ligase modifier subunit) | 274  | GCLM   | 3 | 2 | 1 | 15.3 | 10.6 | 5.8  |
| 269 | -1.06 | 0.79 | -0.13 | O15498 | Synaptobrevin homolog YKT6 (EC 2.3.1.-)                                                                                                                                                             | 198  | YKT6   | 1 | 2 | 1 | 10.4 | 18.3 | 5.5  |
| 270 | -1.06 | 0.79 | 0.84  | Q8NFH3 | Nucleoporin Nup43 (Nup107-160 subcomplex subunit Nup43) (p42)                                                                                                                                       | 380  | NUP43  | 1 | 1 | 1 | 3.7  | 3.7  | 3.7  |
| 271 | -1.06 | 0.00 | 1.20  | O75607 | Nucleoplasmin-3                                                                                                                                                                                     | 178  | NPM3   | 1 | 0 | 1 | 8.4  | 0    | 8.4  |
| 272 | -1.06 | 1.66 | 0.81  | Q5JRX3 | Presequence protease, mitochondrial (hPreP) (EC 3.4.24.-) (Pitriylsin metalloproteinase 1) (Metalloprotease 1) (hMP1)                                                                               | 1037 | PITRM1 | 1 | 2 | 1 | 1.4  | 3.8  | 1.4  |
| 273 | -1.06 | 0.40 | 0.53  | P20290 | Transcription factor BTF3 (Nascent polypeptide-associated complex subunit beta) (NAC-beta) (RNA polymerase B transcription factor 3)                                                                | 206  | BTF3   | 4 | 3 | 4 | 30.2 | 29   | 38.3 |
| 274 | -1.06 | 0.57 | 0.83  | P28072 | Proteasome subunit beta type-6 (EC 3.4.25.1) (Macropain delta chain) (Multicatalytic endopeptidase complex delta chain) (Proteasome delta chain) (Proteasome subunit Y)                             | 239  | PSMB6  | 1 | 1 | 1 | 4.2  | 4.2  | 4.2  |
| 275 | -1.05 | 0.62 | 0.82  | P46777 | 60S ribosomal protein L5                                                                                                                                                                            | 297  | RPL5   | 3 | 1 | 6 | 13.1 | 4.7  | 22.6 |
| 276 | -1.05 | 0.11 | 1.16  | P62701 | 40S ribosomal protein S4, X isoform (SCR10) (Single copy abundant mRNA protein)                                                                                                                     | 263  | RPS4X  | 6 | 3 | 5 | 20.9 | 9.5  | 19   |
| 277 | -1.05 | 0.00 | 1.05  | O00487 | 26S proteasome non-ATPase regulatory subunit 14 (EC 3.4.19.-) (26S proteasome regulatory subunit RPN11) (26S proteasome-associated PAD1 homolog 1)                                                  | 310  | PSMD14 | 1 | 0 | 1 | 4.2  | 0    | 4.2  |



|     |       |       |       |            |                                                                                                                                                      |      |        |   |    |   |      |      |      |
|-----|-------|-------|-------|------------|------------------------------------------------------------------------------------------------------------------------------------------------------|------|--------|---|----|---|------|------|------|
| 278 | -1.04 | 1.41  | 0.86  | P37235     | Hippocalcin-like protein 1 (Calcium-binding protein BDR-1) (HLP2) (Visinin-like protein 3) (VILIP-3)                                                 | 193  | HPCAL1 | 1 | 3  | 1 | 6.2  | 19.2 | 6.2  |
| 279 | -1.04 | 0.86  | 1.15  | P22695     | Cytochrome b-c1 complex subunit 2, mitochondrial (Complex III subunit 2) (Core protein II) (Ubiquinol-cytochrome-c reductase complex core protein 2) | 453  | UQCRC2 | 8 | 4  | 5 | 29.1 | 12.6 | 17.9 |
| 280 | -1.04 | -0.11 | 1.74  | Q92499     | ATP-dependent RNA helicase DDX1 (EC 3.6.4.13) (DEAD box protein 1) (DEAD box protein retinoblastoma) (DBP-RB)                                        | 740  | DDX1   | 1 | 1  | 1 | 2.9  | 2.9  | 2.9  |
| 281 | -1.04 | 0.14  | 0.97  | K7EK18     | Septin-9 (Fragment)                                                                                                                                  | 195  | sept9  | 2 | 1  | 1 | 14.4 | 5.1  | 5.1  |
| 282 | -1.04 | 0.00  | -0.19 | Q9NRX4     | 14 kDa phosphohistidine phosphatase (EC 3.1.3.-) (Phosphohistidine phosphatase 1) (Protein janus-A homolog)                                          | 125  | PHPT1  | 2 | 0  | 1 | 32.8 | 0    | 16   |
| 283 | -1.03 | 0.40  | 0.90  | P22314     | Ubiquitin-like modifier-activating enzyme 1 (Protein A1S9) (Ubiquitin-activating enzyme E1)                                                          | 1058 | UBA1   | 9 | 12 | 8 | 12.9 | 17.3 | 10.6 |
| 284 | -1.03 | 1.04  | 1.55  | P06756     | Integrin alpha-V (Vitronectin receptor subunit alpha) (CD antigen CD51) [Cleaved into: Integrin alpha-V heavy chain; Integrin alpha-V light chain]   | 1048 | ITGAV  | 3 | 4  | 3 | 3.4  | 5.9  | 5.6  |
| 285 | -1.02 | 0.92  | 1.25  | F8WAS3     | NADH dehydrogenase [ubiquinone] 1 alpha subcomplex subunit 5                                                                                         | 70   | NDUFA5 | 1 | 4  | 1 | 14.3 | 51.4 | 14.3 |
| 286 | -1.02 | -0.07 | 0.88  | A0A087WYR0 | Signal recognition particle 19 kDa protein                                                                                                           | 120  | SRP19  | 2 | 2  | 2 | 20   | 22.5 | 20   |
| 287 | -1.02 | 0.24  | 0.32  | P62979     | Ubiquitin-40S ribosomal protein S27a (Ubiquitin carboxyl extension protein 80) [Cleaved into: Ubiquitin; 40S ribosomal protein S27a]                 | 156  | RPS27A | 1 | 3  | 2 | 10.3 | 24.4 | 11.5 |

|     |       |      |      |        |                                                                                                                                                                                                                                                                           |     |        |   |   |   |      |      |      |
|-----|-------|------|------|--------|---------------------------------------------------------------------------------------------------------------------------------------------------------------------------------------------------------------------------------------------------------------------------|-----|--------|---|---|---|------|------|------|
| 288 | -1.02 | 2.43 | 1.46 | Q13263 | Transcription intermediary factor 1-beta (TIF1-beta) (E3 SUMO-protein ligase TRIM28) (EC 6.3.2.-) (KRAB-associated protein 1) (KAP-1) (KRAB-interacting protein 1) (KRIP-1) (Nuclear corepressor KAP-1) (RING finger protein 96) (Tripartite motif-containing protein 28) | 835 | TRIM28 | 5 | 3 | 2 | 10.4 | 8.2  | 3.3  |
| 289 | -1.02 | 0.30 | 0.55 | P50395 | Rab GDP dissociation inhibitor beta (Rab GDI beta) (Guanosine diphosphate dissociation inhibitor 2) (GDI-2)                                                                                                                                                               | 445 | GDI2   | 5 | 5 | 6 | 13   | 16   | 16.6 |
| 290 | -1.02 | 1.26 | 0.00 | P26885 | Peptidyl-prolyl cis-trans isomerase FKBP2 (PPIase FKBP2) (EC 5.2.1.8) (13 kDa FK506-binding protein) (13 kDa FKBP) (FKBP-13) (FK506-binding protein 2) (FKBP-2) (Immunophilin FKBP13) (Rotamase)                                                                          | 142 | FKBP2  | 1 | 3 | 0 | 10.6 | 33.8 | 0    |
| 291 | -1.02 | 1.22 | 1.25 | P27695 | DNA-(apurinic or apyrimidinic site) lyase (EC 3.1.-.-) (EC 4.2.99.18) (APEX nuclease) (APEN) (Apyriminic-apyrimidinic endonuclease 1) (AP endonuclease 1) (APE-1) (REF-1) (Redox factor-1) [Cleaved into: DNA-(apurinic or apyrimidinic site) lyase, mitochondrial]       | 318 | APEX1  | 1 | 2 | 3 | 5.7  | 12.3 | 16.7 |
| 292 | -1.02 | 0.37 | 0.89 | K7EJR3 | 26S proteasome non-ATPase regulatory subunit 8 (Fragment)                                                                                                                                                                                                                 | 250 | PSMD8  | 1 | 2 | 3 | 3.2  | 6.8  | 13.2 |
| 293 | -1.02 | 0.50 | 1.40 | B8ZZJ0 | Small ubiquitin-related modifier 1                                                                                                                                                                                                                                        | 58  | SUMO1  | 1 | 1 | 1 | 20.7 | 20.7 | 20.7 |
| 294 | -1.01 | 0.21 | 0.00 | P62633 | Cellular nucleic acid-binding protein (CNBP) (Zinc finger protein 9)                                                                                                                                                                                                      | 177 | CNBP   | 1 | 3 | 0 | 8.8  | 23.5 | 0    |

|     |       |       |      |            |                                                                                                                                               |     |         |    |    |    |      |      |      |
|-----|-------|-------|------|------------|-----------------------------------------------------------------------------------------------------------------------------------------------|-----|---------|----|----|----|------|------|------|
| 295 | -1.01 | 0.70  | 0.48 | P50990     | T-complex protein 1 subunit theta (TCP-1-theta) (CCT-theta) (Renal carcinoma antigen NY-REN-15)                                               | 548 | CCT8    | 11 | 4  | 14 | 23.9 | 10.8 | 30.5 |
| 296 | -1.01 | 0.00  | 0.00 | C9JYM0     | Ribonuclease P protein subunit p20 (Fragment)                                                                                                 | 137 | POP7    | 1  | 0  | 0  | 10.9 | 0    | 0    |
| 297 | -1.01 | 0.83  | 1.12 | E9PKD5     | 26S protease regulatory subunit 6A (Fragment)                                                                                                 | 311 | PSMC3   | 3  | 2  | 5  | 14.5 | 9.6  | 24.4 |
| 298 | -1.01 | 0.27  | 0.89 | Q13151     | Heterogeneous nuclear ribonucleoprotein A0 (hnRNP A0)                                                                                         | 305 | HNRNPA0 | 1  | 2  | 1  | 4.9  | 2.6  | 4.9  |
| 299 | -1.01 | 0.00  | 0.00 | H7C531     | 26S proteasome non-ATPase regulatory subunit 6 (Fragment)                                                                                     | 138 | PSMD6   | 1  | 0  | 0  | 10.9 | 0    | 0    |
| 300 | -1.00 | 0.54  | 0.72 | P61923     | Coatomer subunit zeta-1 (Zeta-1-coat protein) (Zeta-1 COP)                                                                                    | 177 | COPZ1   | 3  | 4  | 2  | 29.9 | 30.5 | 16.9 |
| 301 | -1.00 | 0.48  | 1.83 | Q16555     | Dihydropyrimidinase-related protein 2 (DRP-2) (Collapsin response mediator protein 2) (CRMP-2) (N2A3) (Unc-33-like phosphoprotein 2) (ULIP-2) | 572 | DPYSL2  | 4  | 2  | 8  | 9.5  | 4.5  | 23.9 |
| 302 | -1.00 | 0.00  | 0.59 | O75822     | Eukaryotic translation initiation factor 3 subunit J (eIF3j) (Eukaryotic translation initiation factor 3 subunit 1) (eIF-3-alpha) (eIF3 p35)  | 258 | EIF3J   | 1  | 0  | 2  | 6.2  | 0    | 14.8 |
| 303 | -1.00 | -0.21 | 0.37 | P60174     | Triosephosphate isomerase (TIM) (EC 5.3.1.1) (Triose-phosphate isomerase)                                                                     | 286 | TPI1    | 12 | 14 | 11 | 66.3 | 69.1 | 57   |
| 304 | -1.00 | 1.01  | 1.04 | P07339     | Cathepsin D (EC 3.4.23.5) [Cleaved into: Cathepsin D light chain; Cathepsin D heavy chain]                                                    | 412 | CTSD    | 2  | 9  | 2  | 5.1  | 23.8 | 6.8  |
| 305 | -1.00 | 0.50  | 0.00 | A0A087WVZ9 | DNA-directed RNA polymerases I, II, and III subunit RPABC1                                                                                    | 184 | POLR2E  | 2  | 2  | 0  | 16.8 | 16.8 | 0    |

|     |       |       |       |            |                                                                                                                                                                                                                   |     |         |    |    |    |      |      |      |
|-----|-------|-------|-------|------------|-------------------------------------------------------------------------------------------------------------------------------------------------------------------------------------------------------------------|-----|---------|----|----|----|------|------|------|
| 306 | -1.00 | -0.10 | 0.79  | P06733     | Alpha-enolase (EC 4.2.1.11) (2-phospho-D-glycerate hydro-lyase) (C-myc promoter-binding protein) (Enolase 1) (MBP-1) (MPB-1) (Non-neural enolase) (NNE) (Phosphopyruvate hydratase) (Plasminogen-binding protein) | 434 | ENO1    | 28 | 15 | 24 | 71   | 41.9 | 55.3 |
| 307 | -0.99 | 0.13  | 1.39  | P05455     | Lupus La protein (La autoantigen) (La ribonucleoprotein) (Sjogren syndrome type B antigen) (SS-B)                                                                                                                 | 408 | SSB     | 6  | 4  | 5  | 20.1 | 12.3 | 18.6 |
| 308 | -0.99 | 0.75  | 1.09  | A0A087WXM6 | 60S ribosomal protein L17 (Fragment)                                                                                                                                                                              | 169 | RPL17   | 6  | 4  | 3  | 30.8 | 29.6 | 16   |
| 309 | -0.99 | 1.49  | 1.06  | P24752     | Acetyl-CoA acetyltransferase, mitochondrial (EC 2.3.1.9) (Acetoacetyl-CoA thiolase) (T2)                                                                                                                          | 427 | ACAT1   | 3  | 2  | 2  | 8    | 8.7  | 6.3  |
| 310 | -0.99 | 1.01  | 0.99  | B4DLN1     | Uncharacterized protein (cDNA FLJ60124, highly similar to Mitochondrial dicarboxylate carrier)                                                                                                                    | 442 |         | 3  | 6  | 3  | 5.2  | 14.5 | 5.2  |
| 311 | -0.99 | 0.18  | 0.82  | D6R9P3     | Heterogeneous nuclear ribonucleoprotein A/B                                                                                                                                                                       | 280 | HNRNPAB | 2  | 1  | 1  | 7.9  | 2.9  | 2.9  |
| 312 | -0.99 | 0.45  | 0.36  | P78371     | T-complex protein 1 subunit beta (TCP-1-beta) (CCT-beta)                                                                                                                                                          | 535 | CCT2    | 12 | 5  | 13 | 27.7 | 14   | 29.5 |
| 313 | -0.99 | 0.53  | 1.46  | P61158     | Actin-related protein 3 (Actin-like protein 3)                                                                                                                                                                    | 418 | ACTR3   | 2  | 2  | 5  | 4.3  | 5.7  | 19.9 |
| 314 | -0.98 | 0.13  | 0.48  | P35270     | Sepiapterin reductase (SPR) (EC 1.1.1.153)                                                                                                                                                                        | 261 | SPR     | 6  | 2  | 3  | 32.2 | 13   | 13.8 |
| 315 | -0.98 | 0.20  | 0.59  | H0Y3P2     | Eukaryotic translation initiation factor 4 gamma 2                                                                                                                                                                | 869 | EIF4G2  | 1  | 1  | 1  | 1.2  | 1.2  | 1.2  |
| 316 | -0.98 | 0.12  | -3.49 | O60925     | Prefoldin subunit 1                                                                                                                                                                                               | 122 | PFDN1   | 1  | 2  | 1  | 8.2  | 16.4 | 10.7 |
| 317 | -0.98 | 0.12  | 1.12  | Q01518     | Adenylyl cyclase-associated protein 1 (CAP 1)                                                                                                                                                                     | 475 | CAP1    | 4  | 5  | 4  | 14.1 | 14.1 | 12   |

|     |       |       |      |        |                                                                                                                                                                                                                                                                                              |     |        |    |    |    |      |      |      |
|-----|-------|-------|------|--------|----------------------------------------------------------------------------------------------------------------------------------------------------------------------------------------------------------------------------------------------------------------------------------------------|-----|--------|----|----|----|------|------|------|
| 318 | -0.98 | 2.02  | 0.49 | P08574 | Cytochrome c1, heme protein, mitochondrial (Complex III subunit 4) (Complex III subunit IV) (Cytochrome b-c1 complex subunit 4) (Ubiquinol-cytochrome-c reductase complex cytochrome c1 subunit) (Cytochrome c-1)                                                                            | 325 | CYC1   | 2  | 1  | 2  | 8.9  | 7.4  | 11.4 |
| 319 | -0.98 | 0.86  | 0.96 | F8W8A6 | 3-hydroxyisobutyryl-CoA hydrolase, mitochondrial (Fragment)                                                                                                                                                                                                                                  | 128 | HIBCH  | 1  | 1  | 1  | 9.4  | 9.4  | 9.4  |
| 320 | -0.98 | 0.04  | 0.35 | P14618 | Pyruvate kinase PKM (EC 2.7.1.40) (Cytosolic thyroid hormone-binding protein) (CTHBP) (Opa-interacting protein 3) (OIP-3) (Pyruvate kinase 2/3) (Pyruvate kinase muscle isozyme) (Thyroid hormone-binding protein 1) (THBP1) (Tumor M2-PK) (p58)                                             | 531 | PKM    | 23 | 14 | 20 | 52.5 | 31.1 | 49.7 |
| 321 | -0.98 | -0.12 | 0.21 | P16152 | Carbonyl reductase [NADPH] 1 (EC 1.1.1.184) (15-hydroxyprostaglandin dehydrogenase [NADP(+)] (EC 1.1.1.197) (NADPH-dependent carbonyl reductase 1) (Prostaglandin 9-ketoreductase) (Prostaglandin-E(2) 9-reductase) (EC 1.1.1.189) (Short chain dehydrogenase/reductase family 21C member 1) | 277 | CBR1   | 4  | 6  | 5  | 21.7 | 26   | 22.7 |
| 322 | -0.98 | 1.00  | 0.79 | P11021 | 78 kDa glucose-regulated protein (GRP-78) (Endoplasmic reticulum luminal Ca(2+)-binding protein grp78) (Heat shock 70 kDa protein 5) (Immunoglobulin heavy chain-binding protein) (BiP)                                                                                                      | 654 | HSPA5  | 17 | 12 | 12 | 32.4 | 28.1 | 22.5 |
| 323 | -0.98 | 1.01  | 0.59 | Q9HAV7 | GrpE protein homolog 1, mitochondrial (HMGE) (Mt-GrpE#1)                                                                                                                                                                                                                                     | 217 | GRPEL1 | 3  | 5  | 3  | 18.9 | 27.2 | 18.9 |

|     |       |      |      |        |                                                                                                                                                                                                               |     |          |    |   |    |      |      |      |
|-----|-------|------|------|--------|---------------------------------------------------------------------------------------------------------------------------------------------------------------------------------------------------------------|-----|----------|----|---|----|------|------|------|
| 324 | -0.98 | 1.37 | 1.31 | P00367 | Glutamate dehydrogenase 1, mitochondrial (GDH 1) (EC 1.4.1.3)                                                                                                                                                 | 558 | GLUD1    | 1  | 3 | 5  | 2.8  | 8.9  | 14.1 |
| 325 | -0.98 | 0.21 | 0.49 | E7EQR4 | Ezrin                                                                                                                                                                                                         | 586 | EZR      | 12 | 8 | 10 | 19.1 | 17.1 | 20.1 |
| 326 | -0.97 | 0.00 | 0.00 | Q96CS3 | FAS-associated factor 2 (Protein ETEA) (UBX domain-containing protein 3B) (UBX domain-containing protein 8)                                                                                                   | 445 | FAF2     | 1  | 0 | 0  | 4    | 0    | 0    |
| 327 | -0.97 | 0.00 | 0.00 | P68402 | Platelet-activating factor acetylhydrolase IB subunit beta (EC 3.1.1.47) (PAF acetylhydrolase 30 kDa subunit) (PAF-AH 30 kDa subunit) (PAF-AH subunit beta) (PAFAH subunit beta)                              | 229 | PAFAH1B2 | 1  | 0 | 0  | 3.9  | 0    | 0    |
| 328 | -0.97 | 0.33 | 2.03 | P51858 | Hepatoma-derived growth factor (HDGF) (High mobility group protein 1-like 2) (HMG-1L2)                                                                                                                        | 240 | HDGF     | 1  | 2 | 3  | 4.2  | 11.2 | 20   |
| 329 | -0.97 | 0.00 | 0.00 | Q96RS6 | NudC domain-containing protein 1 (Chronic myelogenous leukemia tumor antigen 66) (Tumor antigen CML66)                                                                                                        | 583 | NUDCD1   | 1  | 0 | 0  | 2.9  | 0    | 0    |
| 330 | -0.96 | 1.09 | 1.28 | E7ENZ3 | T-complex protein 1 subunit epsilon                                                                                                                                                                           | 486 | CCT5     | 8  | 4 | 7  | 21.2 | 14   | 20.2 |
| 331 | -0.96 | 1.15 | 1.02 | P04843 | Dolichyl-diphosphooligosaccharide--protein glycosyltransferase subunit 1 (EC 2.4.99.18) (Dolichyl-diphosphooligosaccharide--protein glycosyltransferase 67 kDa subunit) (Ribophorin I) (RPN-I) (Ribophorin-1) | 607 | RPN1     | 7  | 4 | 5  | 16.8 | 9.2  | 13.2 |
| 332 | -0.96 | 1.22 | 1.52 | P84095 | Rho-related GTP-binding protein RhoG                                                                                                                                                                          | 191 | RHOG     | 2  | 4 | 1  | 13.1 | 29.8 | 7.3  |
| 333 | -0.96 | 1.19 | 0.91 | P38117 | Electron transfer flavoprotein subunit beta (Beta-ETF)                                                                                                                                                        | 255 | ETFB     | 4  | 8 | 7  | 18   | 34.1 | 26.7 |
| 334 | -0.95 | 0.51 | 0.70 | P13489 | Ribonuclease inhibitor (Placental ribonuclease inhibitor) (Placental RNase inhibitor)                                                                                                                         | 461 | RNH1     | 1  | 1 | 2  | 2.4  | 3    | 4.3  |

|     |       |      |      |        |                                                                                                                                                                                                                                 |     |         |   |    |   |      |      |      |
|-----|-------|------|------|--------|---------------------------------------------------------------------------------------------------------------------------------------------------------------------------------------------------------------------------------|-----|---------|---|----|---|------|------|------|
|     |       |      |      |        | (Ribonuclease/angiogenin inhibitor 1) (RAI)                                                                                                                                                                                     |     |         |   |    |   |      |      |      |
| 335 | -0.94 | 1.30 | 1.27 | Q9P035 | Very-long-chain (3R)-3-hydroxyacyl-CoA dehydratase 3 (EC 4.2.1.134) (3-hydroxyacyl-CoA dehydratase 3) (HACD3) (Butyrate-induced protein 1) (B-ind1) (hB-ind1) (Protein-tyrosine phosphatase-like A domain-containing protein 1) | 362 | HACD3   | 2 | 4  | 1 | 8.8  | 15.5 | 5.8  |
| 336 | -0.94 | 0.60 | 0.24 | C9J3L8 | Translocon-associated protein subunit alpha                                                                                                                                                                                     | 265 | SSR1    | 1 | 2  | 2 | 4.2  | 7.2  | 7.2  |
| 337 | -0.94 | 0.41 | 0.54 | Q13185 | Chromobox protein homolog 3 (HECH) (Heterochromatin protein 1 homolog gamma) (HP1 gamma) (Modifier 2 protein)                                                                                                                   | 183 | CBX3    | 3 | 1  | 3 | 16.4 | 7.7  | 16.4 |
| 338 | -0.94 | 0.69 | 0.00 | Q8NCW5 | NAD(P)H-hydrate epimerase (EC 5.1.99.6) (Apolipoprotein A-I-binding protein) (AI-BP) (NAD(P)HX epimerase) (YjeF N-terminal domain-containing protein 1) (YjeF_N1)                                                               | 288 | APOA1BP | 1 | 2  | 0 | 5.9  | 16.2 | 0    |
| 339 | -0.94 | 0.39 | 1.37 | P26641 | Elongation factor 1-gamma (EF-1-gamma) (eEF-1B gamma)                                                                                                                                                                           | 437 | EEF1G   | 7 | 9  | 8 | 18.3 | 27.5 | 17.2 |
| 340 | -0.94 | 0.99 | 1.42 | P42765 | 3-ketoacyl-CoA thiolase, mitochondrial (EC 2.3.1.16) (Acetyl-CoA acyltransferase) (Beta-ketothiolase) (Mitochondrial 3-oxoacyl-CoA thiolase) (T1)                                                                               | 397 | ACAA2   | 1 | 1  | 1 | 2.8  | 2.8  | 2.8  |
| 341 | -0.94 | 0.62 | 1.16 | Q9NSD9 | Phenylalanine--tRNA ligase beta subunit (EC 6.1.1.20) (Phenylalanyl-tRNA synthetase beta subunit) (PheRS)                                                                                                                       | 589 | FARSB   | 3 | 4  | 4 | 5.1  | 7    | 7    |
| 342 | -0.93 | 0.18 | 0.60 | P37802 | Transgelin-2 (Epididymis tissue protein Li 7e) (SM22-alpha homolog)                                                                                                                                                             | 199 | TAGLN2  | 6 | 11 | 7 | 32.7 | 63.3 | 37.2 |

|     |       |       |      |            |                                                                                                                                                              |      |          |    |    |    |      |      |      |
|-----|-------|-------|------|------------|--------------------------------------------------------------------------------------------------------------------------------------------------------------|------|----------|----|----|----|------|------|------|
| 343 | -0.93 | 0.05  | 1.10 | Q5T8U3     | 60S ribosomal protein L7a (Ribosomal protein L7a) (Fragment)                                                                                                 | 191  | RPL7A    | 6  | 3  | 4  | 31.4 | 17.3 | 17.8 |
| 344 | -0.93 | 0.79  | 0.54 | Q00610     | Clathrin heavy chain 1 (Clathrin heavy chain on chromosome 17) (CLH-17)                                                                                      | 1675 | CLTC     | 18 | 23 | 22 | 15.9 | 21.6 | 19.3 |
| 345 | -0.92 | 1.71  | 1.80 | Q9BSD7     | Cancer-related nucleoside-triphosphatase (NTPase) (EC 3.6.1.15) (Nucleoside triphosphate phosphohydrolase)                                                   | 190  | NTPCR    | 2  | 3  | 3  | 15.8 | 27.9 | 23.7 |
| 346 | -0.92 | 0.00  | 1.72 | B0QYA5     | Eukaryotic translation initiation factor 3 subunit D (Fragment)                                                                                              | 269  | EIF3D    | 2  | 0  | 1  | 9.7  | 0    | 4.5  |
| 347 | -0.92 | -0.17 | 1.00 | P62269     | 40S ribosomal protein S18 (Ke-3) (Ke3)                                                                                                                       | 152  | RPS18    | 4  | 4  | 4  | 19.1 | 19.7 | 19.1 |
| 348 | -0.92 | 0.00  | 0.47 | K7EML9     | Thioredoxin-like protein 1 (Fragment)                                                                                                                        | 138  | TXNL1    | 2  | 0  | 1  | 18.8 | 0    | 10.9 |
| 349 | -0.92 | 0.00  | 0.00 | Q96JB2     | Conserved oligomeric Golgi complex subunit 3 (COG complex subunit 3) (Component of oligomeric Golgi complex 3) (Vesicle-docking protein SEC34 homolog) (p94) | 828  | COG3     | 1  | 0  | 0  | 3.4  | 0    | 0    |
| 350 | -0.92 | 0.45  | 0.80 | Q92598     | Heat shock protein 105 kDa (Antigen NY-CO-25) (Heat shock 110 kDa protein)                                                                                   | 858  | HSPH1    | 7  | 6  | 9  | 12.8 | 9.5  | 15.2 |
| 351 | -0.92 | 0.72  | 0.09 | P51148     | Ras-related protein Rab-5C (L1880) (RAB5L)                                                                                                                   | 216  | RAB5C    | 5  | 4  | 2  | 28.2 | 23.6 | 11.6 |
| 352 | -0.92 | 0.00  | 0.00 | Q9Y3C6     | Peptidyl-prolyl cis-trans isomerase-like 1 (PPIase) (EC 5.2.1.8) (Rotamase PPIL1)                                                                            | 166  | PPIL1    | 1  | 0  | 0  | 10.2 | 0    | 0    |
| 353 | -0.91 | 4.52  | 0.00 | Q9BQ61     | Uncharacterized protein C19orf43                                                                                                                             | 176  | C19orf43 | 1  | 1  | 0  | 7.4  | 13.6 | 0    |
| 354 | -0.91 | 0.00  | 0.00 | F5GXQ0     | BRO1 domain-containing protein BROX                                                                                                                          | 338  | BROX     | 1  | 0  | 0  | 5.6  | 0    | 0    |
| 355 | -0.91 | 0.30  | 0.94 | A0A087WTT1 | Polyadenylate-binding protein (PABP)                                                                                                                         | 522  | PABPC1   | 7  | 5  | 10 | 17.4 | 12.6 | 24.1 |
| 356 | -0.91 | 0.00  | 0.92 | Q6NZI2     | Polymerase I and transcript release factor (Cavin-1)                                                                                                         | 390  | PTRF     | 1  | 0  | 1  | 5    | 0    | 5    |



|     |       |       |      |        |                                                                                                                                                                                                                                                                         |      |         |    |    |   |      |      |      |
|-----|-------|-------|------|--------|-------------------------------------------------------------------------------------------------------------------------------------------------------------------------------------------------------------------------------------------------------------------------|------|---------|----|----|---|------|------|------|
| 357 | -0.90 | 0.00  | 0.20 | P54577 | Tyrosine--tRNA ligase, cytoplasmic (EC 6.1.1.1) (Tyrosyl-tRNA synthetase) (TyrRS) [Cleaved into: Tyrosine--tRNA ligase, cytoplasmic, N-terminally processed]                                                                                                            | 528  | YARS    | 1  | 0  | 1 | 2.3  | 0    | 2.3  |
| 358 | -0.90 | 1.01  | 0.54 | Q15021 | Condensin complex subunit 1 (Chromosome condensation-related SMC-associated protein 1) (Chromosome-associated protein D2) (hCAP-D2) (Non-SMC condensin I complex subunit D2) (XCAP-D2 homolog)                                                                          | 1401 | NCAPD2  | 3  | 2  | 1 | 2.4  | 1.6  | 0.9  |
| 359 | -0.90 | 0.00  | 0.90 | Q01085 | Nucleolysin TIAR (TIA-1-related protein)                                                                                                                                                                                                                                | 375  | TIAL1   | 1  | 0  | 1 | 3.5  | 0    | 8.3  |
| 360 | -0.90 | 0.73  | 0.28 | F8W1R7 | Myosin light polypeptide 6                                                                                                                                                                                                                                              | 145  | MYL6    | 2  | 2  | 4 | 17.2 | 17.2 | 34.5 |
| 361 | -0.89 | 1.15  | 1.24 | P06576 | ATP synthase subunit beta, mitochondrial (EC 3.6.3.14)                                                                                                                                                                                                                  | 529  | ATP5B   | 10 | 12 | 9 | 25.5 | 29.7 | 22.5 |
| 362 | -0.89 | 0.10  | 1.12 | P62266 | 40S ribosomal protein S23                                                                                                                                                                                                                                               | 143  | RPS23   | 2  | 3  | 2 | 15.4 | 21   | 15.4 |
| 363 | -0.89 | 0.54  | 0.99 | P30837 | Aldehyde dehydrogenase X, mitochondrial (EC 1.2.1.3) (Aldehyde dehydrogenase 5) (Aldehyde dehydrogenase family 1 member B1)                                                                                                                                             | 517  | ALDH1B1 | 5  | 2  | 3 | 12.4 | 4.4  | 6.2  |
| 364 | -0.89 | 0.00  | 1.09 | Q5T5U7 | Selenide, water dikinase 1 (Fragment)                                                                                                                                                                                                                                   | 91   | SEPHS1  | 1  | 0  | 1 | 11   | 0    | 11   |
| 365 | -0.89 | 0.99  | 1.04 | P13804 | Electron transfer flavoprotein subunit alpha, mitochondrial (Alpha-ETF)                                                                                                                                                                                                 | 333  | ETFFA   | 7  | 8  | 6 | 31.2 | 36.9 | 22.2 |
| 366 | -0.89 | 0.00  | 0.66 | F2Z3P2 | Uridine 5'-monophosphate synthase                                                                                                                                                                                                                                       | 57   | UMPS    | 1  | 0  | 1 | 29.8 | 0    | 29.8 |
| 367 | -0.89 | -0.15 | 0.20 | P09382 | Galectin-1 (Gal-1) (14 kDa laminin-binding protein) (HLBP14) (14 kDa lectin) (Beta-galactoside-binding lectin L-14-I) (Galaptin) (HBL) (HPL) (Lactose-binding lectin 1) (Lectin galactoside-binding soluble 1) (Putative MAPK-activating protein PM12) (S-Lac lectin 1) | 135  | LGALS1  | 5  | 6  | 4 | 48.1 | 57   | 34.8 |

|     |       |      |       |            |                                                                                                                                                                                                                                                                                                                     |      |          |    |    |    |      |      |      |
|-----|-------|------|-------|------------|---------------------------------------------------------------------------------------------------------------------------------------------------------------------------------------------------------------------------------------------------------------------------------------------------------------------|------|----------|----|----|----|------|------|------|
| 368 | -0.88 | 0.00 | 0.00  | J3QRD6     | 60S ribosome subunit biogenesis protein NIP7 homolog (Fragment)                                                                                                                                                                                                                                                     | 70   | NIP7     | 1  | 0  | 0  | 20   | 0    | 0    |
| 369 | -0.88 | 0.73 | 1.06  | A0A0A0MSS8 | Aldo-keto reductase family 1 member C3                                                                                                                                                                                                                                                                              | 323  | AKR1C3   | 7  | 6  | 7  | 33.4 | 22.9 | 26   |
| 370 | -0.88 | 0.70 | -0.67 | I3L4X2     | Multidrug resistance-associated protein 1 (Fragment)                                                                                                                                                                                                                                                                | 1440 | ABCC1    | 2  | 6  | 3  | 2    | 5.8  | 2.6  |
| 371 | -0.88 | 0.00 | 0.87  | P54886     | Delta-1-pyrroline-5-carboxylate synthase (P5CS) (Aldehyde dehydrogenase family 18 member A1) [Includes: Glutamate 5-kinase (GK) (EC 2.7.2.11) (Gamma-glutamyl kinase); Gamma-glutamyl phosphate reductase (GPR) (EC 1.2.1.41) (Glutamate-5-semialdehyde dehydrogenase) (Glutamyl-gamma-semialdehyde dehydrogenase)] | 795  | ALDH18A1 | 2  | 0  | 3  | 3.2  | 0    | 5.2  |
| 372 | -0.88 | 1.16 | 0.97  | P42704     | Leucine-rich PPR motif-containing protein, mitochondrial (130 kDa leucine-rich protein) (LRP 130) (GP130)                                                                                                                                                                                                           | 1394 | LRPPRC   | 36 | 31 | 35 | 32.4 | 27.9 | 31.3 |
| 373 | -0.88 | 0.93 | 0.98  | O43809     | Cleavage and polyadenylation specificity factor subunit 5 (Cleavage and polyadenylation specificity factor 25 kDa subunit) (CFIm25) (CPSF 25 kDa subunit) (Nucleoside diphosphate-linked moiety X motif 21) (Nudix motif 21) (Pre-mRNA cleavage factor Im 25 kDa subunit)                                           | 227  | NUDT21   | 5  | 4  | 4  | 24.2 | 30   | 18.9 |
| 374 | -0.87 | 1.70 | 0.00  | P11441     | Ubiquitin-like protein 4A (Ubiquitin-like protein GDX)                                                                                                                                                                                                                                                              | 157  | UBL4A    | 1  | 1  | 0  | 6.4  | 9.6  | 0    |
| 375 | -0.87 | 0.00 | 1.40  | P51991     | Heterogeneous nuclear ribonucleoprotein A3 (hnRNP A3)                                                                                                                                                                                                                                                               | 378  | HNRNPA3  | 2  | 0  | 3  | 7.9  | 0    | 10.7 |
| 376 | -0.87 | 0.40 | 1.94  | P62805     | Histone H4                                                                                                                                                                                                                                                                                                          | 103  | HIST1H4A | 3  | 3  | 3  | 22.3 | 28.2 | 22.3 |

|     |       |       |      |        |                                                                                                                                                                                                                                                                                                                                                                                                              |      |        |    |    |    |      |      |      |
|-----|-------|-------|------|--------|--------------------------------------------------------------------------------------------------------------------------------------------------------------------------------------------------------------------------------------------------------------------------------------------------------------------------------------------------------------------------------------------------------------|------|--------|----|----|----|------|------|------|
| 377 | -0.87 | -0.07 | 1.19 | P62847 | 40S ribosomal protein S24                                                                                                                                                                                                                                                                                                                                                                                    | 133  | RPS24  | 4  | 2  | 2  | 30   | 20.8 | 20.8 |
| 378 | -0.87 | 1.37  | 0.91 | P10809 | 60 kDa heat shock protein, mitochondrial (60 kDa chaperonin) (Chaperonin 60) (CPN60) (Heat shock protein 60) (HSP-60) (Hsp60) (HuCHA60) (Mitochondrial matrix protein P1) (P60 lymphocyte protein)                                                                                                                                                                                                           | 573  | HSPD1  | 25 | 20 | 26 | 45.4 | 41.7 | 39.1 |
| 379 | -0.87 | 0.69  | 0.52 | P50991 | T-complex protein 1 subunit delta (TCP-1-delta) (CCT-delta) (Stimulator of TAR RNA-binding)                                                                                                                                                                                                                                                                                                                  | 539  | CCT4   | 8  | 6  | 5  | 20.6 | 14.3 | 11.2 |
| 380 | -0.87 | 0.63  | 0.87 | P46821 | Microtubule-associated protein 1B (MAP-1B) [Cleaved into: MAP1B heavy chain; MAP1 light chain LC1]                                                                                                                                                                                                                                                                                                           | 2468 | MAP1B  | 4  | 5  | 3  | 2.2  | 2.8  | 1.7  |
| 381 | -0.87 | 0.00  | 0.81 | P38919 | Eukaryotic initiation factor 4A-III (eIF-4A-III) (eIF4A-III) (EC 3.6.4.13) (ATP-dependent RNA helicase DDX48) (ATP-dependent RNA helicase eIF4A-3) (DEAD box protein 48) (Eukaryotic initiation factor 4A-like NUK-34) (Eukaryotic translation initiation factor 4A isoform 3) (Nuclear matrix protein 265) (NMP 265) (hNMP 265) [Cleaved into: Eukaryotic initiation factor 4A-III, N-terminally processed] | 411  | EIF4A3 | 2  | 2  | 1  | 5.6  | 5.8  | 2.2  |
| 382 | -0.86 | 1.69  | 0.73 | F8W1A4 | Adenylate kinase 2, mitochondrial (AK 2) (EC 2.7.4.3) (ATP-AMP transphosphorylase 2) (ATP:AMP phosphotransferase) (Adenylate monophosphate kinase)                                                                                                                                                                                                                                                           | 232  | AK2    | 6  | 6  | 5  | 37.9 | 39.2 | 30.2 |

|     |       |      |      |        |                                                                                                                                                                                                                                                                                                                                                                                                                                                                                                   |      |        |    |    |    |      |      |      |
|-----|-------|------|------|--------|---------------------------------------------------------------------------------------------------------------------------------------------------------------------------------------------------------------------------------------------------------------------------------------------------------------------------------------------------------------------------------------------------------------------------------------------------------------------------------------------------|------|--------|----|----|----|------|------|------|
| 383 | -0.86 | 0.55 | 0.58 | P12956 | X-ray repair cross-complementing protein 6 (EC 3.6.4.-) (EC 4.2.99.-) (5'-deoxyribose-5-phosphate lyase Ku70) (5'-dRP lyase Ku70) (70 kDa subunit of Ku antigen) (ATP-dependent DNA helicase 2 subunit 1) (ATP-dependent DNA helicase II 70 kDa subunit) (CTC box-binding factor 75 kDa subunit) (CTC75) (CTCBF) (DNA repair protein XRCC6) (Lupus Ku autoantigen protein p70) (Ku70) (Thyroid-lupus autoantigen) (TLAA) (X-ray repair complementing defective repair in Chinese hamster cells 6) | 609  | XRCC6  | 13 | 9  | 10 | 30.4 | 17.2 | 19.9 |
| 384 | -0.86 | 0.66 | 0.00 | Q5VVW2 | GTPase-activating Rap/Ran-GAP domain-like protein 3                                                                                                                                                                                                                                                                                                                                                                                                                                               | 1013 | GARNL3 | 1  | 1  | 0  | 2.6  | 2.6  | 0    |
| 385 | -0.86 | 0.67 | 0.62 | P55072 | Transitional endoplasmic reticulum ATPase (TER ATPase) (EC 3.6.4.6) (15S Mg(2+)-ATPase p97 subunit) (Valosin-containing protein) (VCP)                                                                                                                                                                                                                                                                                                                                                            | 806  | VCP    | 12 | 15 | 17 | 19.7 | 26.3 | 27.3 |
| 386 | -0.86 | 0.00 | 0.00 | D6RDJ3 | DNA-directed RNA polymerases I and III subunit RPAC1 (Fragment)                                                                                                                                                                                                                                                                                                                                                                                                                                   | 124  | POLR1C | 1  | 0  | 0  | 10.5 | 0    | 0    |
| 387 | -0.86 | 1.00 | 1.23 | P13073 | Cytochrome c oxidase subunit 4 isoform 1, mitochondrial (Cytochrome c oxidase polypeptide IV) (Cytochrome c oxidase subunit IV isoform 1) (COX IV-1)                                                                                                                                                                                                                                                                                                                                              | 169  | COX4I1 | 3  | 5  | 2  | 13.6 | 30.2 | 12.4 |

|     |       |       |      |            |                                                                                                                                                                                                                              |     |        |   |    |   |      |      |      |
|-----|-------|-------|------|------------|------------------------------------------------------------------------------------------------------------------------------------------------------------------------------------------------------------------------------|-----|--------|---|----|---|------|------|------|
| 388 | -0.86 | -0.11 | 0.63 | P30086     | Phosphatidylethanolamine-binding protein 1 (PEBP-1) (HCNPPp) (Neuropolypeptide h3) (Prostatic-binding protein) (Raf kinase inhibitor protein) (RKIP) [Cleaved into: Hippocampal cholinergic neurostimulating peptide (HCNP)] | 187 | PEBP1  | 2 | 4  | 2 | 8.6  | 24.6 | 8.6  |
| 389 | -0.85 | 1.12  | 1.08 | O75489     | NADH dehydrogenase [ubiquinone] iron-sulfur protein 3, mitochondrial (EC 1.6.5.3) (EC 1.6.99.3) (Complex I-30kD) (CI-30kD) (NADH-ubiquinone oxidoreductase 30 kDa subunit)                                                   | 264 | NDUFS3 | 1 | 5  | 1 | 6.4  | 26.1 | 4.9  |
| 390 | -0.85 | 0.00  | 1.35 | Q9Y4Z0     | U6 snRNA-associated Sm-like protein LSm4 (Glycine-rich protein) (GRP)                                                                                                                                                        | 139 | LSM4   | 1 | 0  | 3 | 5.8  | 0    | 21.6 |
| 391 | -0.85 | 0.06  | 1.08 | P62280     | 40S ribosomal protein S11                                                                                                                                                                                                    | 158 | RPS11  | 4 | 6  | 3 | 17.1 | 35.4 | 19   |
| 392 | -0.85 | 0.00  | 0.00 | Q8N1F7     | Nuclear pore complex protein Nup93 (93 kDa nucleoporin) (Nucleoporin Nup93)                                                                                                                                                  | 819 | NUP93  | 2 | 0  | 0 | 3.3  | 0    | 0    |
| 393 | -0.84 | 0.76  | 0.60 | P61978     | Heterogeneous nuclear ribonucleoprotein K (hnRNP K) (Transformation up-regulated nuclear protein) (TUNP)                                                                                                                     | 463 | HNRNPK | 8 | 10 | 7 | 21.6 | 32.5 | 24.8 |
| 394 | -0.84 | 0.00  | 1.23 | A0A087X1S2 | Nuclease-sensitive element-binding protein 1                                                                                                                                                                                 | 314 | YBX1   | 1 | 0  | 3 | 4.8  | 0    | 16.2 |
| 395 | -0.84 | 0.36  | 0.03 | O00303     | Eukaryotic translation initiation factor 3 subunit F (eIF3f) (Deubiquitinating enzyme eIF3f) (EC 3.4.19.12) (Eukaryotic translation initiation factor 3 subunit 5) (eIF-3-epsilon) (eIF3 p47)                                | 357 | EIF3F  | 4 | 1  | 3 | 13.7 | 3.1  | 11.8 |
| 396 | -0.83 | -0.41 | 0.73 | P42766     | 60S ribosomal protein L35                                                                                                                                                                                                    | 123 | RPL35  | 1 | 2  | 1 | 8.1  | 15.4 | 8.1  |

|     |       |       |      |        |                                                                                                                                                                                                         |      |        |   |   |   |      |      |      |
|-----|-------|-------|------|--------|---------------------------------------------------------------------------------------------------------------------------------------------------------------------------------------------------------|------|--------|---|---|---|------|------|------|
| 397 | -0.83 | 0.93  | 0.80 | P39656 | Dolichyl-diphosphooligosaccharide--protein glycosyltransferase 48 kDa subunit (DDOST 48 kDa subunit) (Oligosaccharyl transferase 48 kDa subunit) (EC 2.4.99.18)                                         | 456  | DDOST  | 2 | 2 | 2 | 5    | 4.6  | 4.1  |
| 398 | -0.83 | 1.18  | 0.02 | C9JFR7 | Cytochrome c (Fragment)                                                                                                                                                                                 | 101  | CYCS   | 1 | 3 | 2 | 14.9 | 22.8 | 21.8 |
| 399 | -0.83 | 0.53  | 1.19 | P62829 | 60S ribosomal protein L23 (60S ribosomal protein L17)                                                                                                                                                   | 140  | RPL23  | 4 | 3 | 2 | 37.9 | 27.1 | 20   |
| 400 | -0.83 | -0.57 | 1.25 | Q15435 | Protein phosphatase 1 regulatory subunit 7 (Protein phosphatase 1 regulatory subunit 22)                                                                                                                | 360  | PPP1R7 | 1 | 1 | 1 | 8.1  | 8.1  | 8.1  |
| 401 | -0.83 | 0.39  | 0.33 | Q92841 | Probable ATP-dependent RNA helicase DDX17 (EC 3.6.4.13) (DEAD box protein 17) (DEAD box protein p72) (RNA-dependent helicase p72)                                                                       | 729  | DDX17  | 4 | 1 | 3 | 6.6  | 2    | 4.6  |
| 402 | -0.83 | 0.18  | 1.46 | E7EPB3 | 60S ribosomal protein L14                                                                                                                                                                               | 124  | RPL14  | 2 | 2 | 2 | 17.7 | 17.7 | 17.7 |
| 403 | -0.83 | 0.00  | 0.00 | O00203 | AP-3 complex subunit beta-1 (Adaptor protein complex AP-3 subunit beta-1) (Adaptor-related protein complex 3 subunit beta-1) (Beta-3A-adaptin) (Clathrin assembly protein complex 3 beta-1 large chain) | 1094 | AP3B1  | 1 | 0 | 0 | 1.1  | 0    | 0    |
| 404 | -0.82 | 0.57  | 1.26 | Q7L014 | Probable ATP-dependent RNA helicase DDX46 (EC 3.6.4.13) (DEAD box protein 46) (PRP5 homolog)                                                                                                            | 1031 | DDX46  | 2 | 2 | 2 | 2.2  | 1.8  | 2    |
| 405 | -0.82 | 0.00  | 0.28 | F5H7R9 | Parathymosin (Fragment)                                                                                                                                                                                 | 57   | PTMS   | 1 | 0 | 1 | 19.3 | 0    | 19.3 |
| 406 | -0.82 | 0.00  | 1.23 | P41091 | Eukaryotic translation initiation factor 2 subunit 3 (Eukaryotic translation initiation factor 2 subunit gamma X) (eIF-2-gamma X) (eIF-2gX)                                                             | 472  | EIF2S3 | 1 | 0 | 3 | 3.4  | 0    | 9.3  |
| 407 | -0.82 | 1.09  | 0.94 | Q5QP23 | RNA-binding protein 39 (Fragment)                                                                                                                                                                       | 231  | RBM39  | 1 | 1 | 1 | 6.5  | 6.5  | 6.5  |
| 408 | -0.82 | -0.39 | 0.34 | Q9Y281 | Cofilin-2 (Cofilin, muscle isoform)                                                                                                                                                                     | 166  | CFL2   | 4 | 4 | 5 | 34.3 | 36.1 | 32.5 |

|     |       |       |      |            |                                                                                                                                              |      |         |    |    |    |      |      |      |
|-----|-------|-------|------|------------|----------------------------------------------------------------------------------------------------------------------------------------------|------|---------|----|----|----|------|------|------|
| 409 | -0.82 | 1.00  | 0.00 | Q9UMS0     | NFU1 iron-sulfur cluster scaffold homolog, mitochondrial (HIRA-interacting protein 5)                                                        | 254  | NFU1    | 1  | 3  | 0  | 4.3  | 17   | 0    |
| 410 | -0.82 | 0.85  | 0.69 | P45880     | Voltage-dependent anion-selective channel protein 2 (VDAC-2) (hVDAC2) (Outer mitochondrial membrane protein porin 2)                         | 294  | VDAC2   | 3  | 5  | 6  | 17.3 | 20.5 | 30.4 |
| 411 | -0.81 | 0.00  | 0.00 | G3V4D9     | Nuclear export mediator factor NEMF (Fragment)                                                                                               | 178  | NEMF    | 1  | 0  | 0  | 5.6  | 0    | 0    |
| 412 | -0.81 | 1.66  | 0.00 | A0A087WTZ2 | Ran-binding protein 17                                                                                                                       | 518  | RANBP17 | 1  | 2  | 0  | 2.1  | 3.9  | 0    |
| 413 | -0.81 | 0.78  | 0.67 | Q9UIJ7     | GTP:AMP phosphotransferase AK3, mitochondrial (EC 2.7.4.10) (Adenylate kinase 3) (AK 3) (Adenylate kinase 3 alpha-like 1)                    | 227  | AK3     | 2  | 5  | 3  | 11   | 26   | 14.5 |
| 414 | -0.81 | -0.09 | 0.06 | P13797     | Plastin-3 (T-plastin)                                                                                                                        | 630  | PLS3    | 9  | 5  | 6  | 17.6 | 11.4 | 9.5  |
| 415 | -0.81 | 0.57  | 0.41 | P11142     | Heat shock cognate 71 kDa protein (Heat shock 70 kDa protein 8) (Lipopolysaccharide-associated protein 1) (LAP-1) (LPS-associated protein 1) | 646  | HSPA8   | 18 | 15 | 15 | 34.8 | 31.6 | 28.3 |
| 416 | -0.80 | 1.10  | 0.57 | F5GY37     | Prohibitin-2                                                                                                                                 | 267  | PHB2    | 3  | 5  | 2  | 11.2 | 22.8 | 7.1  |
| 417 | -0.80 | 0.87  | 0.57 | Q60FE5     | Filamin A (Filamin-A)                                                                                                                        | 2620 | FLNA    | 25 | 26 | 28 | 13.5 | 14.2 | 14.8 |
| 418 | -0.80 | 0.03  | 0.55 | A0A0A0MTR7 | E3 ubiquitin-protein ligase RNF213                                                                                                           | 5207 | RNF213  | 2  | 1  | 4  | 0.5  | 0.3  | 0.9  |
| 419 | -0.80 | 0.48  | 0.13 | E7EQ69     | N-alpha-acetyltransferase 50                                                                                                                 | 168  | NAA50   | 5  | 3  | 6  | 28.6 | 19.6 | 28.6 |
| 420 | -0.80 | 0.30  | 0.62 | Q92616     | Translational activator GCN1 (HsGCN1) (GCN1-like protein 1)                                                                                  | 2671 | GCN1L1  | 8  | 9  | 17 | 4.3  | 4.3  | 8.8  |
| 421 | -0.80 | -0.05 | 0.64 | O00571     | ATP-dependent RNA helicase DDX3X (EC 3.6.4.13) (DEAD box protein 3, X-chromosomal) (DEAD box, X isoform) (Helicase-like protein 2) (HLP2)    | 662  | DDX3X   | 6  | 2  | 4  | 11   | 4.5  | 7.1  |

|     |       |       |      |        |                                                                                                                                                                                                                                        |     |        |   |   |   |      |      |      |
|-----|-------|-------|------|--------|----------------------------------------------------------------------------------------------------------------------------------------------------------------------------------------------------------------------------------------|-----|--------|---|---|---|------|------|------|
| 422 | -0.79 | 1.29  | 0.93 | O95292 | Vesicle-associated membrane protein-associated protein B/C (VAMP-B/VAMP-C) (VAMP-associated protein B/C) (VAP-B/VAP-C)                                                                                                                 | 243 | VAPB   | 3 | 3 | 4 | 16.9 | 16   | 22.6 |
| 423 | -0.79 | -0.66 | 0.64 | Q9NR33 | DNA polymerase epsilon subunit 4 (EC 2.7.7.7) (DNA polymerase II subunit 4) (DNA polymerase epsilon subunit p12)                                                                                                                       | 117 | POLE4  | 1 | 1 | 1 | 9.4  | 9.4  | 9.4  |
| 424 | -0.79 | -0.27 | 0.00 | P17931 | Galectin-3 (Gal-3) (35 kDa lectin) (Carbohydrate-binding protein 35) (CBP 35) (Galactose-specific lectin 3) (Galactoside-binding protein) (GALBP) (IgE-binding protein) (L-31) (Laminin-binding protein) (Lectin L-29) (Mac-2 antigen) | 250 | LGALS3 | 2 | 1 | 0 | 8.8  | 4.4  | 0    |
| 425 | -0.79 | 0.00  | 0.00 | M0R253 | Deoxyhypusine synthase                                                                                                                                                                                                                 | 132 | DHPS   | 1 | 0 | 0 | 9.1  | 0    | 0    |
| 426 | -0.79 | 0.00  | 0.81 | Q15404 | Ras suppressor protein 1 (RSP-1) (Rsu-1)                                                                                                                                                                                               | 277 | RSU1   | 2 | 0 | 3 | 8    | 0    | 16.1 |
| 427 | -0.79 | 1.54  | 1.47 | B4DY09 | Interleukin enhancer-binding factor 2 (cDNA FLJ51660, highly similar to Interleukin enhancer-binding factor 2)                                                                                                                         | 352 | ILF2   | 1 | 1 | 2 | 5.7  | 4.5  | 8.5  |
| 428 | -0.79 | 0.08  | 0.78 | P61970 | Nuclear transport factor 2 (NTF-2) (Placental protein 15) (PP15)                                                                                                                                                                       | 127 | NUTF2  | 1 | 2 | 1 | 6.3  | 11.8 | 12.6 |
| 429 | -0.78 | 1.28  | 0.31 | P05387 | 60S acidic ribosomal protein P2 (Renal carcinoma antigen NY-REN-44)                                                                                                                                                                    | 115 | RPLP2  | 2 | 4 | 1 | 39.1 | 62.6 | 10.4 |
| 430 | -0.78 | 0.00  | 0.39 | F8WEG8 | Interferon-inducible double-stranded RNA-dependent protein kinase activator A                                                                                                                                                          | 95  | PRKRA  | 1 | 0 | 1 | 10.5 | 0    | 10.5 |
| 431 | -0.78 | 0.00  | 0.78 | Q12765 | Secernin-1                                                                                                                                                                                                                             | 414 | SCRN1  | 1 | 0 | 1 | 3.8  | 0    | 3.8  |
| 432 | -0.78 | 0.00  | 0.00 | Q96S52 | GPI transamidase component PIG-S (Phosphatidylinositol-glycan biosynthesis class S protein)                                                                                                                                            | 555 | PIGS   | 1 | 0 | 0 | 2    | 0    | 0    |



|     |       |       |      |            |                                                                                                                                                                                                                                                                           |      |         |    |    |   |      |      |      |
|-----|-------|-------|------|------------|---------------------------------------------------------------------------------------------------------------------------------------------------------------------------------------------------------------------------------------------------------------------------|------|---------|----|----|---|------|------|------|
| 433 | -0.78 | 0.68  | 0.52 | P08107     | Heat shock 70 kDa protein 1A/1B (Heat shock 70 kDa protein 1/2) (HSP70-1/HSP70-2) (HSP70.1/HSP70.2)                                                                                                                                                                       | 641  | HSPA1A  | 11 | 11 | 8 | 21.1 | 25.3 | 13.7 |
| 434 | -0.78 | 0.00  | 0.81 | B4DQI4     | Alpha/beta hydrolase domain-containing protein 14B (cDNA FLJ52723, highly similar to Abhydrolase domain-containing protein 14B)                                                                                                                                           | 188  | ABHD14B | 1  | 0  | 1 | 6.9  | 0    | 6.9  |
| 435 | -0.78 | 0.00  | 0.11 | H0YF12     | Tyrosine-protein phosphatase non-receptor type 11 (Fragment)                                                                                                                                                                                                              | 108  | PTPN11  | 1  | 0  | 1 | 13   | 0    | 13   |
| 436 | -0.77 | -0.02 | 0.36 | P42224     | Signal transducer and activator of transcription 1-alpha/beta (Transcription factor ISGF-3 components p91/p84)                                                                                                                                                            | 750  | STAT1   | 3  | 1  | 2 | 6.2  | 1.7  | 3.5  |
| 437 | -0.77 | 0.00  | 0.00 | Q08J23     | tRNA (cytosine(34)-C(5))-methyltransferase (EC 2.1.1.203) (Myc-induced SUN domain-containing protein) (Misu) (NOL1/NOP2/Sun domain family member 2) (Substrate of AIM1/Aurora kinase B) (tRNA (cytosine-5-)-methyltransferase) (tRNA methyltransferase 4 homolog) (hTrm4) | 767  | NSUN2   | 1  | 0  | 0 | 2.1  | 0    | 0    |
| 438 | -0.77 | 0.15  | 0.27 | P60228     | Eukaryotic translation initiation factor 3 subunit E (eIF3e) (Eukaryotic translation initiation factor 3 subunit 6) (Viral integration site protein INT-6 homolog) (eIF-3 p48)                                                                                            | 445  | EIF3E   | 5  | 2  | 3 | 11.7 | 4.7  | 6.3  |
| 439 | -0.77 | 0.00  | 0.85 | A0A087WUT6 | Eukaryotic translation initiation factor 5B                                                                                                                                                                                                                               | 1220 | EIF5B   | 1  | 0  | 1 | 0.7  | 0    | 0.9  |
| 440 | -0.77 | 0.00  | 0.00 | X6RDA4     | Paraspeckle component 1 (Fragment)                                                                                                                                                                                                                                        | 248  | PSPC1   | 1  | 0  | 0 | 4.4  | 0    | 0    |

|     |       |       |       |        |                                                                                                                                                                                                         |      |         |    |    |    |      |      |      |
|-----|-------|-------|-------|--------|---------------------------------------------------------------------------------------------------------------------------------------------------------------------------------------------------------|------|---------|----|----|----|------|------|------|
| 441 | -0.77 | 1.22  | 1.19  | O75369 | Filamin-B (FLN-B) (ABP-278) (ABP-280 homolog) (Actin-binding-like protein) (Beta-filamin) (Filamin homolog 1) (Fh1) (Filamin-3) (Thyroid autoantigen) (Truncated actin-binding protein) (Truncated ABP) | 2602 | FLNB    | 19 | 43 | 34 | 11.3 | 23.1 | 19.4 |
| 442 | -0.76 | 0.48  | 0.84  | P34932 | Heat shock 70 kDa protein 4 (HSP70RY) (Heat shock 70-related protein APG-2)                                                                                                                             | 840  | HSPA4   | 10 | 10 | 10 | 15.6 | 15.4 | 15.4 |
| 443 | -0.76 | 0.08  | 0.74  | O76003 | Glutaredoxin-3 (PKC-interacting cousin of thioredoxin) (PICOT) (PKC-theta-interacting protein) (PKCq-interacting protein) (Thioredoxin-like protein 2)                                                  | 335  | GLRX3   | 6  | 2  | 5  | 20.6 | 6.6  | 17.6 |
| 444 | -0.76 | -0.17 | 0.92  | P61758 | Prefoldin subunit 3 (HIBBJ46) (Von Hippel-Lindau-binding protein 1) (VBP-1) (VHL-binding protein 1)                                                                                                     | 197  | VBP1    | 4  | 3  | 4  | 23.9 | 18.8 | 23.9 |
| 445 | -0.76 | 0.05  | 0.89  | O43242 | 26S proteasome non-ATPase regulatory subunit 3 (26S proteasome regulatory subunit RPN3) (26S proteasome regulatory subunit S3) (Proteasome subunit p58)                                                 | 534  | PSMD3   | 2  | 1  | 3  | 6.7  | 3.4  | 10.7 |
| 446 | -0.76 | 0.57  | -3.51 | P31937 | 3-hydroxyisobutyrate dehydrogenase, mitochondrial (HIBADH) (EC 1.1.1.31)                                                                                                                                | 336  | HIBADH  | 2  | 4  | 2  | 8    | 14.6 | 8.9  |
| 447 | -0.76 | 1.22  | 0.14  | O75323 | Protein NipSnap homolog 2 (NipSnap2) (Glioblastoma-amplified sequence)                                                                                                                                  | 286  | GBAS    | 1  | 2  | 2  | 5.6  | 8.7  | 8    |
| 448 | -0.76 | 0.47  | 1.01  | H0Y3Y4 | Septin-7 (Fragment)                                                                                                                                                                                     | 373  | sept7   | 1  | 1  | 2  | 2.4  | 2.4  | 7    |
| 449 | -0.76 | 0.00  | 0.00  | Q6P1M0 | Long-chain fatty acid transport protein 4 (FATP-4) (Fatty acid transport protein 4) (EC 6.2.1.-) (Solute carrier family 27 member 4)                                                                    | 643  | SLC27A4 | 1  | 0  | 0  | 1.7  | 0    | 0    |

|     |       |       |       |        |                                                                                                                                                                                                                                                                                                         |     |          |   |   |   |      |      |      |
|-----|-------|-------|-------|--------|---------------------------------------------------------------------------------------------------------------------------------------------------------------------------------------------------------------------------------------------------------------------------------------------------------|-----|----------|---|---|---|------|------|------|
| 450 | -0.75 | 0.00  | 0.00  | Q12904 | Aminoacyl tRNA synthase complex-interacting multifunctional protein 1 (Multisynthase complex auxiliary component p43) [Cleaved into: Endothelial monocyte-activating polypeptide 2 (EMAP-2) (Endothelial monocyte-activating polypeptide II) (EMAP-II) (Small inducible cytokine subfamily E member 1)] | 312 | AIMP1    | 1 | 0 | 0 | 5.8  | 0    | 0    |
| 451 | -0.75 | 0.00  | 0.68  | P50995 | Annexin A11 (56 kDa autoantigen) (Annexin XI) (Annexin-11) (Calcyclin-associated annexin 50) (CAP-50)                                                                                                                                                                                                   | 505 | ANXA11   | 1 | 0 | 2 | 2.3  | 0    | 5.5  |
| 452 | -0.75 | 1.45  | -0.07 | P21964 | Catechol O-methyltransferase (EC 2.1.1.6)                                                                                                                                                                                                                                                               | 271 | COMT     | 1 | 2 | 1 | 7.2  | 17.2 | 7.2  |
| 453 | -0.75 | -0.35 | -0.10 | Q01469 | Fatty acid-binding protein, epidermal (Epidermal-type fatty acid-binding protein) (E-FABP) (Fatty acid-binding protein 5) (Psoriasis-associated fatty acid-binding protein homolog) (PA-FABP)                                                                                                           | 135 | FABP5    | 1 | 4 | 1 | 8.1  | 31.1 | 8.1  |
| 454 | -0.75 | 1.18  | 1.26  | Q9H7Z7 | Prostaglandin E synthase 2 (Membrane-associated prostaglandin E synthase-2) (mPGE synthase-2) (Microsomal prostaglandin E synthase 2) (mPGES-2) (Prostaglandin-H(2) E-isomerase) (EC 5.3.99.3) [Cleaved into: Prostaglandin E synthase 2 truncated form]                                                | 377 | PTGES2   | 3 | 2 | 5 | 11.1 | 10.9 | 24.1 |
| 455 | -0.75 | 0.31  | 0.83  | P55010 | Eukaryotic translation initiation factor 5 (eIF-5)                                                                                                                                                                                                                                                      | 431 | EIF5     | 2 | 1 | 3 | 5.6  | 2.1  | 8.6  |
| 456 | -0.75 | 0.00  | 2.51  | X1WI28 | 60S ribosomal protein L10 (Fragment)                                                                                                                                                                                                                                                                    | 200 | RPL10    | 1 | 0 | 3 | 6.5  | 0    | 21   |
| 457 | -0.75 | 0.73  | 2.36  | P10412 | Histone H1.4 (Histone H1b) (Histone H1s-4)                                                                                                                                                                                                                                                              | 219 | HIST1H1E | 5 | 5 | 5 | 15.5 | 22.4 | 15.1 |

|     |       |       |      |        |                                                                                                                                                                         |      |           |    |    |    |      |      |      |
|-----|-------|-------|------|--------|-------------------------------------------------------------------------------------------------------------------------------------------------------------------------|------|-----------|----|----|----|------|------|------|
| 458 | -0.74 | 0.97  | 1.11 | P62316 | Small nuclear ribonucleoprotein Sm D2 (Sm-D2) (snRNP core protein D2)                                                                                                   | 118  | SNRPD2    | 4  | 4  | 4  | 28.8 | 36.4 | 28.8 |
| 459 | -0.74 | 1.45  | 0.95 | Q9P0L0 | Vesicle-associated membrane protein-associated protein A (VAMP-A) (VAMP-associated protein A) (VAP-A) (33 kDa VAMP-associated protein) (VAP-33)                         | 249  | VAPA      | 2  | 4  | 2  | 5.6  | 17.7 | 5.6  |
| 460 | -0.74 | 0.00  | 1.32 | O95831 | Apoptosis-inducing factor 1, mitochondrial (EC 1.1.1.-) (Programmed cell death protein 8)                                                                               | 613  | AIFM1     | 1  | 0  | 1  | 2.6  | 0    | 2.6  |
| 461 | -0.74 | -0.28 | 0.24 | Q99471 | Prefoldin subunit 5 (C-Myc-binding protein Mm-1) (Myc modulator 1)                                                                                                      | 154  | PFDN5     | 3  | 3  | 2  | 31.2 | 21.4 | 21.4 |
| 462 | -0.74 | 3.08  | 1.04 | P53597 | Succinyl-CoA ligase [ADP/GDP-forming] subunit alpha, mitochondrial (EC 6.2.1.4) (EC 6.2.1.5) (Succinyl-CoA synthetase subunit alpha) (SCS-alpha)                        | 346  | SUCLG1    | 1  | 1  | 1  | 2.9  | 4.6  | 2.9  |
| 463 | -0.74 | 1.61  | 3.10 | Q99878 | Histone H2A type 1-J (Histone H2A/e)                                                                                                                                    | 128  | HIST1H2AJ | 1  | 3  | 2  | 8.6  | 27.3 | 23.4 |
| 464 | -0.73 | 0.59  | 0.53 | Q9HAV4 | Exportin-5 (Exp5) (Ran-binding protein 21)                                                                                                                              | 1204 | XPO5      | 2  | 2  | 2  | 2.1  | 2.1  | 2.1  |
| 465 | -0.73 | 0.61  | 0.46 | P23919 | Thymidylate kinase (EC 2.7.4.9) (dTMP kinase)                                                                                                                           | 212  | DTYMK     | 2  | 4  | 2  | 9.4  | 26.9 | 9.4  |
| 466 | -0.72 | -0.04 | 0.61 | P07195 | L-lactate dehydrogenase B chain (LDH-B) (EC 1.1.1.27) (LDH heart subunit) (LDH-H) (Renal carcinoma antigen NY-REN-46)                                                   | 334  | LDHB      | 13 | 13 | 12 | 40.7 | 40.7 | 39.5 |
| 467 | -0.72 | 1.47  | 1.25 | E5RJU9 | Protein LYRIC                                                                                                                                                           | 526  | MTDH      | 1  | 2  | 1  | 2.3  | 6.1  | 2.3  |
| 468 | -0.72 | 0.38  | 0.74 | O75396 | Vesicle-trafficking protein SEC22b (ER-Golgi SNARE of 24 kDa) (ERS-24) (ERS24) (SEC22 vesicle-trafficking protein homolog B) (SEC22 vesicle-trafficking protein-like 1) | 215  | SEC22B    | 2  | 3  | 2  | 13.5 | 18.1 | 13.5 |

|     |       |       |       |        |                                                                                                                                                                                                        |      |          |    |    |    |      |      |      |
|-----|-------|-------|-------|--------|--------------------------------------------------------------------------------------------------------------------------------------------------------------------------------------------------------|------|----------|----|----|----|------|------|------|
| 469 | -0.72 | 1.05  | 1.37  | O75533 | Splicing factor 3B subunit 1 (Pre-mRNA-splicing factor SF3b 155 kDa subunit) (SF3b155) (Spliceosome-associated protein 155) (SAP 155)                                                                  | 1304 | SF3B1    | 4  | 5  | 5  | 3.9  | 5.1  | 5.7  |
| 470 | -0.71 | 0.27  | 0.81  | Q06830 | Peroxiredoxin-1 (EC 1.11.1.15) (Natural killer cell-enhancing factor A) (NKEF-A) (Proliferation-associated gene protein) (PAG) (Thioredoxin peroxidase 2) (Thioredoxin-dependent peroxide reductase 2) | 199  | PRDX1    | 10 | 12 | 11 | 55.3 | 68.8 | 51.3 |
| 471 | -0.71 | -0.21 | 0.06  | O94903 | Proline synthase co-transcribed bacterial homolog protein                                                                                                                                              | 275  | PROSC    | 3  | 1  | 1  | 17.5 | 4.7  | 4.7  |
| 472 | -0.70 | 0.61  | 0.76  | O60506 | Heterogeneous nuclear ribonucleoprotein Q (hnRNP Q) (Glycine- and tyrosine-rich RNA-binding protein) (GRY-RBP) (NS1-associated protein 1) (Synaptotagmin-binding, cytoplasmic RNA-interacting protein) | 623  | SYNCRIP  | 5  | 2  | 6  | 13.1 | 6.5  | 13.9 |
| 473 | -0.70 | 0.00  | -0.01 | E9PHI6 | Cytoplasmic dynein 1 light intermediate chain 1                                                                                                                                                        | 407  | DYNC1LI1 | 1  | 0  | 1  | 4.7  | 0    | 4.7  |
| 474 | -0.70 | 0.00  | 0.87  | Q9NZN4 | EH domain-containing protein 2 (PAST homolog 2)                                                                                                                                                        | 543  | EHD2     | 1  | 0  | 2  | 2.8  | 0    | 5    |
| 475 | -0.70 | 1.27  | 1.55  | Q15393 | Splicing factor 3B subunit 3 (Pre-mRNA-splicing factor SF3b 130 kDa subunit) (SF3b130) (STAF130) (Spliceosome-associated protein 130) (SAP 130)                                                        | 1217 | SF3B3    | 2  | 3  | 3  | 1.7  | 3.5  | 4.1  |
| 476 | -0.70 | 0.66  | -0.13 | P61006 | Ras-related protein Rab-8A (Oncogene c-mel)                                                                                                                                                            | 207  | RAB8A    | 3  | 4  | 3  | 14.5 | 21.3 | 14.5 |
| 477 | -0.70 | -0.76 | 0.16  | Q14116 | Interleukin-18 (IL-18) (Ibictadekin) (Interferon gamma-inducing factor) (IFN-gamma-inducing factor) (Interleukin-1 gamma) (IL-1 gamma)                                                                 | 193  | IL18     | 2  | 2  | 2  | 13.2 | 9.5  | 10.1 |
| 478 | -0.70 | 0.85  | 0.58  | P61026 | Ras-related protein Rab-10                                                                                                                                                                             | 200  | RAB10    | 2  | 7  | 3  | 9.5  | 32   | 17   |

|     |       |       |       |        |                                                                                                                                                                                                                                                                                                                                                                                                                                                                           |      |       |   |    |   |      |      |      |
|-----|-------|-------|-------|--------|---------------------------------------------------------------------------------------------------------------------------------------------------------------------------------------------------------------------------------------------------------------------------------------------------------------------------------------------------------------------------------------------------------------------------------------------------------------------------|------|-------|---|----|---|------|------|------|
| 479 | -0.70 | 1.11  | 0.91  | P40926 | Malate dehydrogenase, mitochondrial (EC 1.1.1.37)                                                                                                                                                                                                                                                                                                                                                                                                                         | 338  | MDH2  | 4 | 15 | 8 | 15.4 | 56.5 | 25.7 |
| 480 | -0.69 | 0.76  | 0.36  | Q8TED1 | Probable glutathione peroxidase 8 (GPx-8) (GSHPx-8) (EC 1.11.1.9)                                                                                                                                                                                                                                                                                                                                                                                                         | 209  | GPX8  | 1 | 2  | 2 | 5.3  | 10   | 10   |
| 481 | -0.69 | -0.08 | 0.71  | P49773 | Histidine triad nucleotide-binding protein 1 (EC 3.-.-.) (Adenosine 5'-monophosphoramidase) (Protein kinase C inhibitor 1) (Protein kinase C-interacting protein 1) (PKCI-1)                                                                                                                                                                                                                                                                                              | 126  | HINT1 | 2 | 4  | 2 | 35.7 | 31   | 35.7 |
| 482 | -0.69 | -0.48 | -0.23 | P22102 | Trifunctional purine biosynthetic protein adenosine-3 [Includes: Phosphoribosylamine--glycine ligase (EC 6.3.4.13) (Glycinamide ribonucleotide synthetase) (GARS) (Phosphoribosylglycinamide synthetase); Phosphoribosylformylglycinamide cyclo-ligase (EC 6.3.3.1) (AIR synthase) (AIRS) (Phosphoribosyl-aminoimidazole synthetase); Phosphoribosylglycinamide formyltransferase (EC 2.1.2.2) (5'-phosphoribosylglycinamide transformylase) (GAR transformylase) (GART)] | 1010 | GART  | 3 | 1  | 1 | 4.6  | 1.3  | 1.3  |
| 483 | -0.69 | -0.04 | 0.76  | P62826 | GTP-binding nuclear protein Ran (Androgen receptor-associated protein 24) (GTPase Ran) (Ras-like protein TC4) (Ras-related nuclear protein)                                                                                                                                                                                                                                                                                                                               | 216  | RAN   | 8 | 7  | 6 | 38.4 | 38.9 | 27.3 |
| 484 | -0.69 | 0.00  | 0.85  | Q5T4S7 | E3 ubiquitin-protein ligase UBR4 (EC 6.3.2.-) (600 kDa retinoblastoma protein-associated factor) (N-recognin-4) (Retinoblastoma-associated factor of 600 kDa)                                                                                                                                                                                                                                                                                                             | 5183 | UBR4  | 1 | 0  | 2 | 0.2  | 0    | 0.4  |

|     |       |       |      |        |                                                                                                                                                                                                          |      |       |    |   |   |      |      |      |
|-----|-------|-------|------|--------|----------------------------------------------------------------------------------------------------------------------------------------------------------------------------------------------------------|------|-------|----|---|---|------|------|------|
|     |       |       |      |        | (RBAF600) (p600) (Zinc finger UBR1-type protein 1)                                                                                                                                                       |      |       |    |   |   |      |      |      |
| 485 | -0.69 | -0.04 | 0.93 | O14980 | Exportin-1 (Exp1) (Chromosome region maintenance 1 protein homolog)                                                                                                                                      | 1071 | XPO1  | 10 | 7 | 7 | 11.4 | 8.3  | 8.3  |
| 486 | -0.68 | 0.00  | 1.37 | P62195 | 26S protease regulatory subunit 8 (26S proteasome AAA-ATPase subunit RPT6) (Proteasome 26S subunit ATPase 5) (Proteasome subunit p45) (Thyroid hormone receptor-interacting protein 1) (TRIP1) (p45/SUG) | 406  | PSMC5 | 4  | 0 | 6 | 15.8 | 0    | 22.1 |
| 487 | -0.68 | 0.33  | 0.40 | O14818 | Proteasome subunit alpha type-7 (EC 3.4.25.1) (Proteasome subunit RC6-1) (Proteasome subunit XAPC7)                                                                                                      | 248  | PSMA7 | 6  | 8 | 5 | 32.7 | 40.3 | 23.4 |
| 488 | -0.68 | 1.03  | 0.40 | P61106 | Ras-related protein Rab-14                                                                                                                                                                               | 215  | RAB14 | 6  | 9 | 5 | 39.1 | 58.1 | 23.7 |
| 489 | -0.68 | 0.29  | 1.03 | P20618 | Proteasome subunit beta type-1 (EC 3.4.25.1) (Macropain subunit C5) (Multicatalytic endopeptidase complex subunit C5) (Proteasome component C5) (Proteasome gamma chain)                                 | 241  | PSMB1 | 3  | 7 | 4 | 20.3 | 35.7 | 26.6 |
| 490 | -0.67 | 0.35  | 0.46 | O15145 | Actin-related protein 2/3 complex subunit 3 (Arp2/3 complex 21 kDa subunit) (p21-ARC)                                                                                                                    | 178  | ARPC3 | 3  | 3 | 1 | 16.3 | 20.8 | 7.3  |
| 491 | -0.67 | 0.00  | 0.30 | E9PI86 | Nuclear autoantigenic sperm protein (Fragment)                                                                                                                                                           | 256  | NASP  | 2  | 0 | 1 | 13.7 | 0    | 4.7  |

|     |       |       |      |            |                                                                                                                                                                               |     |          |    |    |    |      |      |      |
|-----|-------|-------|------|------------|-------------------------------------------------------------------------------------------------------------------------------------------------------------------------------|-----|----------|----|----|----|------|------|------|
| 492 | -0.67 | 0.00  | 0.00 | Q9NR28     | Diablo homolog, mitochondrial (Direct IAP-binding protein with low pI) (Second mitochondria-derived activator of caspase) (Smac)                                              | 239 | DIABLO   | 2  | 0  | 0  | 12.4 | 0    | 0    |
| 493 | -0.67 | 0.00  | 0.84 | B7ZBQ0     | Serine/threonine-protein phosphatase 2A activator (EC 5.2.1.8) (Phosphotyrosyl phosphatase activator)                                                                         | 61  | PPP2R4   | 1  | 0  | 1  | 13.1 | 0    | 13.1 |
| 494 | -0.67 | 0.10  | 0.11 | O14737     | Programmed cell death protein 5 (TF-1 cell apoptosis-related protein 19) (Protein TFAR19)                                                                                     | 125 | PDCD5    | 3  | 2  | 3  | 18.4 | 17.6 | 18.4 |
| 495 | -0.66 | 0.12  | 0.58 | P33316     | Deoxyuridine 5'-triphosphate nucleotidohydrolase, mitochondrial (dUTPase) (EC 3.6.1.23) (dUTP pyrophosphatase)                                                                | 252 | DUT      | 2  | 2  | 2  | 18.9 | 15.9 | 17.7 |
| 496 | -0.66 | 0.18  | 0.60 | P13639     | Elongation factor 2 (EF-2)                                                                                                                                                    | 858 | EEF2     | 15 | 20 | 24 | 21.9 | 33.4 | 34.5 |
| 497 | -0.66 | 0.64  | 0.47 | P0CW22     | 40S ribosomal protein S17-like                                                                                                                                                | 135 | RPS17L   | 4  | 5  | 1  | 51.9 | 39.3 | 7.4  |
| 498 | -0.65 | 0.06  | 0.75 | P62851     | 40S ribosomal protein S25                                                                                                                                                     | 125 | RPS25    | 3  | 3  | 2  | 24   | 16   | 16   |
| 499 | -0.65 | -0.32 | 0.37 | H0YH58     | Oligoribonuclease, mitochondrial (Fragment)                                                                                                                                   | 111 | REXO2    | 1  | 1  | 1  | 9    | 9    | 9    |
| 500 | -0.65 | 0.62  | 0.00 | A0A0A0MSK5 | Torsin-1A-interacting protein 1                                                                                                                                               | 462 | TOR1AIP1 | 1  | 1  | 0  | 2.6  | 2.8  | 0    |
| 501 | -0.65 | 0.75  | 1.08 | P04792     | Heat shock protein beta-1 (HspB1) (28 kDa heat shock protein) (Estrogen-regulated 24 kDa protein) (Heat shock 27 kDa protein) (HSP 27) (Stress-responsive protein 27) (SRP27) | 205 | HSPB1    | 4  | 10 | 5  | 21.5 | 69.8 | 24.9 |
| 502 | -0.65 | -0.76 | 0.70 | P00352     | Retinal dehydrogenase 1 (RALDH 1) (RalDH1) (EC 1.2.1.36) (ALDH-E1) (ALHDII) (Aldehyde dehydrogenase family 1 member A1) (Aldehyde dehydrogenase, cytosolic)                   | 501 | ALDH1A1  | 24 | 21 | 22 | 58.7 | 47.5 | 53.5 |



|     |       |       |      |        |                                                                                                                                                                                                                                                          |      |          |    |    |    |      |      |      |
|-----|-------|-------|------|--------|----------------------------------------------------------------------------------------------------------------------------------------------------------------------------------------------------------------------------------------------------------|------|----------|----|----|----|------|------|------|
| 503 | -0.64 | 0.00  | 1.10 | Q6NUK1 | Calcium-binding mitochondrial carrier protein SCaMC-1 (Mitochondrial ATP-Mg/Pi carrier protein 1) (Mitochondrial Ca(2+)-dependent solute carrier protein 1) (Small calcium-binding mitochondrial carrier protein 1) (Solute carrier family 25 member 24) | 477  | SLC25A24 | 1  | 0  | 1  | 3.5  | 0    | 3.5  |
| 504 | -0.64 | -0.25 | 0.60 | Q13200 | 26S proteasome non-ATPase regulatory subunit 2 (26S proteasome regulatory subunit RPN1) (26S proteasome regulatory subunit S2) (26S proteasome subunit p97) (Protein 55.11) (Tumor necrosis factor type 1 receptor-associated protein 2)                 | 908  | PSMD2    | 5  | 1  | 4  | 8.5  | 1.2  | 7.1  |
| 505 | -0.64 | 1.02  | 1.48 | G3V576 | Heterogeneous nuclear ribonucleoproteins C1/C2                                                                                                                                                                                                           | 231  | HNRNPC   | 4  | 5  | 5  | 15.2 | 22.9 | 19.5 |
| 506 | -0.64 | 1.04  | 1.05 | Q7KZF4 | Staphylococcal nuclease domain-containing protein 1 (100 kDa coactivator) (EBNA2 coactivator p100) (Tudor domain-containing protein 11) (p100 co-activator)                                                                                              | 910  | SND1     | 6  | 3  | 7  | 9.7  | 5.5  | 12.7 |
| 507 | -0.64 | 0.00  | 0.00 | Q12974 | Protein tyrosine phosphatase type IVA 2 (EC 3.1.3.48) (HU-PP-1) (OV-1) (PTP(CAAXII)) (Protein-tyrosine phosphatase 4a2) (Protein-tyrosine phosphatase of regenerating liver 2) (PRL-2)                                                                   | 167  | PTP4A2   | 1  | 0  | 0  | 11   | 0    | 0    |
| 508 | -0.64 | 1.26  | 0.63 | Q9NZM1 | Myoferlin (Fer-1-like protein 3)                                                                                                                                                                                                                         | 2061 | MYOF     | 11 | 22 | 14 | 5.7  | 13.3 | 8.9  |
| 509 | -0.63 | 0.51  | 0.03 | Q13509 | Tubulin beta-3 chain (Tubulin beta-4 chain) (Tubulin beta-III)                                                                                                                                                                                           | 450  | TUBB3    | 4  | 5  | 7  | 11.8 | 14.4 | 17.1 |
| 510 | -0.63 | -0.23 | 0.21 | P31947 | 14-3-3 protein sigma (Epithelial cell marker protein 1) (Stratifin)                                                                                                                                                                                      | 248  | SFN      | 6  | 8  | 8  | 27   | 36.7 | 36.7 |

|     |       |      |      |            |                                                                                                                                                                                                                                                                  |     |          |    |    |    |      |      |      |
|-----|-------|------|------|------------|------------------------------------------------------------------------------------------------------------------------------------------------------------------------------------------------------------------------------------------------------------------|-----|----------|----|----|----|------|------|------|
| 511 | -0.63 | 0.55 | 0.22 | C9J9K3     | 40S ribosomal protein SA (Fragment)                                                                                                                                                                                                                              | 263 | RPSA     | 9  | 7  | 5  | 36.5 | 38.8 | 23.2 |
| 512 | -0.63 | 0.12 | 0.37 | P68371     | Tubulin beta-4B chain (Tubulin beta-2 chain) (Tubulin beta-2C chain)                                                                                                                                                                                             | 445 | TUBB4B   | 8  | 11 | 9  | 26.7 | 36.2 | 26.5 |
| 513 | -0.62 | 0.75 | 0.83 | P01111     | GTPase NRas (Transforming protein N-Ras)                                                                                                                                                                                                                         | 189 | NRAS     | 3  | 1  | 2  | 20.1 | 6.3  | 12.2 |
| 514 | -0.62 | 0.90 | 0.71 | J3QR09     | Ribosomal protein L19                                                                                                                                                                                                                                            | 193 | RPL19    | 2  | 1  | 2  | 8.8  | 8.8  | 8.8  |
| 515 | -0.62 | 0.00 | 0.17 | O00429     | Dynamin-1-like protein (EC 3.6.5.5) (Dnm1p/Vps1p-like protein) (DVLP) (Dynamin family member proline-rich carboxyl-terminal domain less) (Dymple) (Dynamin-like protein) (Dynamin-like protein 4) (Dynamin-like protein IV) (HdynIV) (Dynamin-related protein 1) | 736 | DNM1L    | 2  | 0  | 1  | 2.9  | 0    | 1.6  |
| 516 | -0.62 | 0.72 | 0.31 | P07355     | Annexin A2 (Annexin II) (Annexin-2) (Calpactin I heavy chain) (Calpactin-1 heavy chain) (Chromobindin-8) (Lipocortin II) (Placental anticoagulant protein IV) (PAP-IV) (Protein I) (p36)                                                                         | 339 | ANXA2    | 17 | 17 | 11 | 51   | 52.8 | 29.5 |
| 517 | -0.62 | 0.26 | 0.34 | P04406     | Glyceraldehyde-3-phosphate dehydrogenase (GAPDH) (EC 1.2.1.12) (Peptidyl-cysteine S-nitrosylase GAPDH) (EC 2.6.99.-)                                                                                                                                             | 335 | GAPDH    | 8  | 9  | 8  | 31.9 | 46   | 28.7 |
| 518 | -0.62 | 1.25 | 1.21 | H7C2U6     | Protein NipSnap homolog 1 (Fragment)                                                                                                                                                                                                                             | 221 | NIPSNAP1 | 2  | 1  | 2  | 10.9 | 6.3  | 10.9 |
| 519 | -0.62 | 0.35 | 0.40 | F8VZJ2     | Nascent polypeptide-associated complex subunit alpha                                                                                                                                                                                                             | 136 | NACA     | 3  | 3  | 2  | 30.1 | 30.9 | 20.6 |
| 520 | -0.61 | 0.18 | 0.69 | P08238     | Heat shock protein HSP 90-beta (HSP 90) (Heat shock 84 kDa) (HSP 84) (HSP84)                                                                                                                                                                                     | 724 | HSP90AB1 | 28 | 14 | 29 | 35.8 | 21.3 | 35.6 |
| 521 | -0.61 | 2.78 | 0.63 | A0A087WTV6 | Pyrrroline-5-carboxylate reductase 2                                                                                                                                                                                                                             | 246 | PYCR2    | 2  | 1  | 1  | 13.4 | 7.3  | 6.1  |

|     |       |       |       |            |                                                                                                                                                                                 |      |         |    |    |    |      |      |      |
|-----|-------|-------|-------|------------|---------------------------------------------------------------------------------------------------------------------------------------------------------------------------------|------|---------|----|----|----|------|------|------|
| 522 | -0.61 | 0.37  | 0.64  | P31948     | Stress-induced-phosphoprotein 1 (STI1) (Hsc70/Hsp90-organizing protein) (Hop) (Renal carcinoma antigen NY-REN-11) (Transformation-sensitive protein IEF SSP 3521)               | 543  | STIP1   | 11 | 5  | 15 | 20.3 | 11.2 | 30.9 |
| 523 | -0.61 | 0.58  | -0.03 | P26639     | Threonine--tRNA ligase, cytoplasmic (EC 6.1.1.3) (Threonyl-tRNA synthetase) (ThrRS)                                                                                             | 723  | TARS    | 3  | 1  | 2  | 4    | 1.4  | 2.6  |
| 524 | -0.61 | -1.22 | 0.29  | Q9Y617     | Phosphoserine aminotransferase (EC 2.6.1.52) (Phosphohydroxythreonine aminotransferase) (PSAT)                                                                                  | 370  | PSAT1   | 7  | 1  | 6  | 19.7 | 2.7  | 16.8 |
| 525 | -0.61 | 0.00  | 0.59  | P68366     | Tubulin alpha-4A chain (Alpha-tubulin 1) (Testis-specific alpha-tubulin) (Tubulin H2-alpha) (Tubulin alpha-1 chain)                                                             | 448  | TUBA4A  | 8  | 8  | 11 | 25.4 | 26.6 | 37.9 |
| 526 | -0.61 | 0.47  | 0.87  | P53396     | ATP-citrate synthase (EC 2.3.3.8) (ATP-citrate (pro-S-)-lyase) (ACL) (Citrate cleavage enzyme)                                                                                  | 1101 | ACLY    | 9  | 12 | 10 | 11.2 | 14.8 | 14.2 |
| 527 | -0.60 | -0.50 | -0.02 | P60981     | Destrin (Actin-depolymerizing factor) (ADF)                                                                                                                                     | 165  | DSTN    | 6  | 6  | 3  | 34.5 | 41.9 | 14.9 |
| 528 | -0.60 | 0.03  | 0.71  | O60218     | Aldo-keto reductase family 1 member B10 (EC 1.1.1.-) (ARL-1) (Aldose reductase-like) (Aldose reductase-related protein) (ARP) (hARP) (Small intestine reductase) (SI reductase) | 316  | AKR1B10 | 15 | 16 | 13 | 50.9 | 64.6 | 49.1 |
| 529 | -0.59 | 0.29  | 0.84  | A0A024QZP7 | Cell division cycle 2, G1 to S and G2 to M, isoform CRA_a (Cyclin-dependent kinase 1)                                                                                           | 297  | CDC2    | 1  | 2  | 3  | 4    | 7.7  | 11.8 |
| 530 | -0.59 | 0.02  | -0.14 | O75223     | Gamma-glutamylcyclotransferase (EC 2.3.2.4) (Cytochrome c-releasing factor 21)                                                                                                  | 188  | GGCT    | 2  | 3  | 1  | 14.4 | 17   | 5.3  |
| 531 | -0.59 | 2.57  | 1.07  | M0QXS5     | Heterogeneous nuclear ribonucleoprotein L (Fragment)                                                                                                                            | 530  | HNRNPL  | 2  | 2  | 2  | 4.9  | 4    | 9.6  |

|     |       |       |      |        |                                                                                                                                                                                        |      |       |    |   |    |      |      |      |
|-----|-------|-------|------|--------|----------------------------------------------------------------------------------------------------------------------------------------------------------------------------------------|------|-------|----|---|----|------|------|------|
| 532 | -0.59 | -0.53 | 0.12 | P43490 | Nicotinamide phosphoribosyltransferase (NAMPRase) (Nampt) (EC 2.4.2.12) (Pre-B-cell colony-enhancing factor 1) (Pre-B cell-enhancing factor) (Visfatin)                                | 491  | NAMPT | 10 | 6 | 10 | 28.9 | 16.9 | 25.1 |
| 533 | -0.59 | 0.60  | 0.72 | Q9Y266 | Nuclear migration protein nudC (Nuclear distribution protein C homolog)                                                                                                                | 331  | NUDC  | 4  | 2 | 2  | 13.9 | 6.9  | 7.9  |
| 534 | -0.58 | 0.88  | 1.99 | Q08211 | ATP-dependent RNA helicase A (RHA) (EC 3.6.4.13) (DEAH box protein 9) (Leukophysin) (LKP) (Nuclear DNA helicase II) (NDH II)                                                           | 1270 | DHX9  | 5  | 3 | 7  | 4.4  | 2.8  | 7.2  |
| 535 | -0.58 | 1.13  | 1.17 | P05556 | Integrin beta-1 (Fibronectin receptor subunit beta) (Glycoprotein IIa) (GPIIA) (VLA-4 subunit beta) (CD antigen CD29)                                                                  | 798  | ITGB1 | 6  | 9 | 6  | 11   | 14.2 | 9.5  |
| 536 | -0.58 | 1.25  | 0.88 | P30048 | Thioredoxin-dependent peroxide reductase, mitochondrial (EC 1.11.1.15) (Antioxidant protein 1) (AOP-1) (HBC189) (Peroxiredoxin III) (Prx-III) (Peroxiredoxin-3) (Protein MER5 homolog) | 256  | PRDX3 | 7  | 7 | 6  | 34   | 43.3 | 21   |
| 537 | -0.58 | 0.00  | 0.49 | P14735 | Insulin-degrading enzyme (EC 3.4.24.56) (Abeta-degrading protease) (Insulin protease) (Insulinase) (Insulysin)                                                                         | 1019 | IDE   | 3  | 0 | 3  | 3.5  | 0    | 3.5  |
| 538 | -0.58 | 1.02  | 0.60 | P48047 | ATP synthase subunit O, mitochondrial (Oligomycin sensitivity conferral protein) (OSCP)                                                                                                | 213  | ATP5O | 5  | 7 | 5  | 25.8 | 39   | 33.3 |
| 539 | -0.58 | 0.03  | 0.36 | B8ZZQ6 | Prothymosin alpha                                                                                                                                                                      | 107  | PTMA  | 1  | 1 | 1  | 13.1 | 13.1 | 13.1 |
| 540 | -0.58 | 1.77  | 0.28 | P09601 | Heme oxygenase 1 (HO-1) (EC 1.14.99.3)                                                                                                                                                 | 288  | HMOX1 | 4  | 6 | 2  | 15.3 | 26   | 4.5  |

|     |       |      |      |        |                                                                                                                                                                                                                                                                                      |     |        |    |   |    |      |      |      |
|-----|-------|------|------|--------|--------------------------------------------------------------------------------------------------------------------------------------------------------------------------------------------------------------------------------------------------------------------------------------|-----|--------|----|---|----|------|------|------|
| 541 | -0.58 | 0.01 | 1.10 | P62906 | 60S ribosomal protein L10a (CSA-19) (Neural precursor cell expressed developmentally down-regulated protein 6) (NEDD-6)                                                                                                                                                              | 217 | RPL10A | 9  | 5 | 8  | 36.9 | 23.5 | 36.9 |
| 542 | -0.57 | 0.00 | 1.00 | P04181 | Ornithine aminotransferase, mitochondrial (EC 2.6.1.13) (Ornithine delta-aminotransferase) (Ornithine--oxo-acid aminotransferase) [Cleaved into: Ornithine aminotransferase, hepatic form; Ornithine aminotransferase, renal form]                                                   | 439 | OAT    | 3  | 0 | 3  | 11.6 | 0    | 11.6 |
| 543 | -0.57 | 0.21 | 1.18 | P52272 | Heterogeneous nuclear ribonucleoprotein M (hnRNP M)                                                                                                                                                                                                                                  | 730 | HNRNPM | 3  | 1 | 5  | 6.2  | 2.3  | 11   |
| 544 | -0.57 | 1.02 | 0.53 | Q13162 | Peroxiredoxin-4 (EC 1.11.1.15) (Antioxidant enzyme AOE372) (AOE37-2) (Peroxiredoxin IV) (Prx-IV) (Thioredoxin peroxidase AO372) (Thioredoxin-dependent peroxide reductase A0372)                                                                                                     | 271 | PRDX4  | 5  | 7 | 4  | 23.6 | 35.4 | 15.9 |
| 545 | -0.57 | 0.81 | 0.00 | P02792 | Ferritin light chain (Ferritin L subunit)                                                                                                                                                                                                                                            | 175 | FTL    | 1  | 1 | 0  | 8.6  | 8.6  | 0    |
| 546 | -0.57 | 0.76 | 0.69 | P30101 | Protein disulfide-isomerase A3 (EC 5.3.4.1) (58 kDa glucose-regulated protein) (58 kDa microsomal protein) (p58) (Disulfide isomerase ER-60) (Endoplasmic reticulum resident protein 57) (ER protein 57) (ERp57) (Endoplasmic reticulum resident protein 60) (ER protein 60) (ERp60) | 505 | PDIA3  | 10 | 9 | 10 | 22.8 | 18.4 | 26.7 |
| 547 | -0.57 | 0.54 | 0.20 | K7ERF1 | Eukaryotic translation initiation factor 3 subunit K (eIF3k) (Eukaryotic translation initiation factor 3 subunit 12) (eIF-3 p25)                                                                                                                                                     | 192 | EIF3K  | 2  | 2 | 1  | 14.6 | 13   | 7.3  |

|     |       |       |      |        |                                                                                                                                                                                          |      |          |    |   |    |      |      |      |
|-----|-------|-------|------|--------|------------------------------------------------------------------------------------------------------------------------------------------------------------------------------------------|------|----------|----|---|----|------|------|------|
| 548 | -0.57 | 0.25  | 0.86 | Q02218 | 2-oxoglutarate dehydrogenase, mitochondrial (EC 1.2.4.2) (2-oxoglutarate dehydrogenase complex component E1) (OGDC-E1) (Alpha-ketoglutarate dehydrogenase)                               | 1023 | OGDH     | 2  | 2 | 2  | 2.1  | 2.5  | 2.1  |
| 549 | -0.56 | 0.49  | 0.65 | Q5VTE0 | Putative elongation factor 1-alpha-like 3 (EF-1-alpha-like 3) (Eukaryotic elongation factor 1 A-like 3) (eEF1A-like 3) (Eukaryotic translation elongation factor 1 alpha-1 pseudogene 5) | 462  | EEF1A1P5 | 11 | 9 | 13 | 30.5 | 29.7 | 33.3 |
| 550 | -0.56 | -0.10 | 0.56 | P27348 | 14-3-3 protein theta (14-3-3 protein T-cell) (14-3-3 protein tau) (Protein HS1)                                                                                                          | 245  | YWHAQ    | 6  | 9 | 7  | 31.8 | 36.7 | 29   |
| 551 | -0.56 | 1.28  | 0.97 | P35998 | 26S protease regulatory subunit 7 (26S proteasome AAA-ATPase subunit RPT1) (Proteasome 26S subunit ATPase 2) (Protein MSS1)                                                              | 433  | PSMC2    | 4  | 2 | 4  | 11.3 | 6.9  | 12.5 |
| 552 | -0.56 | 0.00  | 0.71 | O43837 | Isocitrate dehydrogenase [NAD] subunit beta, mitochondrial (EC 1.1.1.41) (Isocitric dehydrogenase subunit beta) (NAD(+)-specific ICDH subunit beta)                                      | 385  | IDH3B    | 3  | 0 | 3  | 9.9  | 0    | 9.9  |
| 553 | -0.56 | -0.04 | 0.23 | P31689 | DnaJ homolog subfamily A member 1 (DnaJ protein homolog 2) (HSDJ) (Heat shock 40 kDa protein 4) (Heat shock protein J2) (HSJ-2) (Human DnaJ protein 2) (hDj-2)                           | 397  | DNAJA1   | 3  | 1 | 3  | 10   | 3.9  | 10   |
| 554 | -0.56 | -0.29 | 0.97 | Q9UBQ7 | Glyoxylate reductase/hydroxypyruvate reductase (EC 1.1.1.79) (EC 1.1.1.81)                                                                                                               | 328  | GRHPR    | 3  | 1 | 5  | 18   | 3    | 24.1 |
| 555 | -0.56 | 1.59  | 0.86 | P61604 | 10 kDa heat shock protein, mitochondrial (Hsp10) (10 kDa chaperonin) (Chaperonin 10) (CPN10) (Early-pregnancy factor) (EPF)                                                              | 102  | HSPE1    | 1  | 7 | 4  | 13.7 | 57.8 | 35.3 |

|     |       |       |       |        |                                                                                                                                                                |     |         |    |    |   |      |      |      |
|-----|-------|-------|-------|--------|----------------------------------------------------------------------------------------------------------------------------------------------------------------|-----|---------|----|----|---|------|------|------|
| 556 | -0.55 | 1.44  | 1.14  | E9PKG1 | Protein arginine N-methyltransferase 1                                                                                                                         | 325 | PRMT1   | 1  | 2  | 2 | 3.7  | 8.3  | 8.3  |
| 557 | -0.55 | 0.15  | 0.52  | P26038 | Moesin (Membrane-organizing extension spike protein)                                                                                                           | 577 | MSN     | 10 | 5  | 9 | 15.3 | 8.7  | 13.5 |
| 558 | -0.55 | 0.00  | 1.09  | Q6PI48 | Aspartate--tRNA ligase, mitochondrial (EC 6.1.1.12) (Aspartyl-tRNA synthetase) (AspRS)                                                                         | 645 | DARS2   | 1  | 0  | 1 | 1.9  | 0    | 1.1  |
| 559 | -0.55 | 0.43  | 0.52  | P23284 | Peptidyl-prolyl cis-trans isomerase B (PPIase B) (EC 5.2.1.8) (CYP-S1) (Cyclophilin B) (Rotamase B) (S-cyclophilin) (SCYLP)                                    | 216 | PPIB    | 6  | 10 | 6 | 21.3 | 48.1 | 22.2 |
| 560 | -0.55 | 0.91  | 0.93  | O14880 | Microsomal glutathione S-transferase 3 (Microsomal GST-3) (EC 2.5.1.18) (Microsomal GST-III)                                                                   | 152 | MGST3   | 1  | 1  | 1 | 9.2  | 9.2  | 9.9  |
| 561 | -0.54 | 1.63  | 0.88  | E9PPQ5 | Cysteine and histidine-rich domain-containing protein 1                                                                                                        | 184 | CHORDC1 | 2  | 1  | 3 | 12.5 | 7.6  | 25   |
| 562 | -0.54 | 0.00  | 2.38  | J3KQV6 | COP9 signalosome complex subunit 7b                                                                                                                            | 54  | COPS7B  | 1  | 0  | 1 | 35.2 | 0    | 35.2 |
| 563 | -0.54 | -0.25 | -0.11 | P13693 | Translationally-controlled tumor protein (TCTP) (Fortilin) (Histamine-releasing factor) (HRF) (p23)                                                            | 172 | TPT1    | 4  | 4  | 2 | 30.2 | 30.2 | 15.7 |
| 564 | -0.54 | 0.00  | 0.97  | O00116 | Alkyldihydroxyacetonephosphate synthase, peroxisomal (Alkyl-DHAP synthase) (EC 2.5.1.26) (Aging-associated gene 5 protein) (Alkylglycerone-phosphate synthase) | 658 | AGPS    | 2  | 0  | 3 | 4    | 0    | 6.5  |
| 565 | -0.54 | 0.81  | 0.49  | Q05193 | Dynamin-1 (EC 3.6.5.5)                                                                                                                                         | 864 | DNM1    | 2  | 1  | 2 | 2.1  | 0.8  | 2.5  |

|     |       |       |      |        |                                                                                                                                                                                                                                                                    |     |       |   |   |   |      |      |      |
|-----|-------|-------|------|--------|--------------------------------------------------------------------------------------------------------------------------------------------------------------------------------------------------------------------------------------------------------------------|-----|-------|---|---|---|------|------|------|
| 566 | -0.54 | 0.32  | 0.54 | Q06323 | Proteasome activator complex subunit 1 (11S regulator complex subunit alpha) (REG-alpha) (Activator of multicatalytic protease subunit 1) (Interferon gamma up-regulated I-5111 protein) (IGUP I-5111) (Proteasome activator 28 subunit alpha) (PA28a) (PA28alpha) | 249 | PSME1 | 7 | 6 | 9 | 32.5 | 24.5 | 36.5 |
| 567 | -0.54 | 0.00  | 1.10 | Q9H814 | Phosphorylated adapter RNA export protein (RNA U small nuclear RNA export adapter protein)                                                                                                                                                                         | 394 | PHAX  | 1 | 0 | 1 | 2.8  | 0    | 2.8  |
| 568 | -0.53 | -0.16 | 0.44 | Q9Y237 | Peptidyl-prolyl cis-trans isomerase NIMA-interacting 4 (EC 5.2.1.8) (Parvulin-14) (Par14) (hPar14) (Parvulin-17) (Par17) (hPar17) (Peptidyl-prolyl cis-trans isomerase Pin4) (PPIase Pin4) (Peptidyl-prolyl cis/trans isomerase EPVH) (hEPVH) (Rotamase Pin4)      | 131 | PIN4  | 1 | 1 | 2 | 9.2  | 9.2  | 17.6 |
| 569 | -0.53 | 0.18  | 0.64 | C9J2Q4 | Septin-2 (Fragment)                                                                                                                                                                                                                                                | 184 | sept2 | 2 | 2 | 2 | 10.9 | 10.9 | 10.9 |
| 570 | -0.53 | 1.87  | 1.19 | Q07021 | Complement component 1 Q subcomponent-binding protein, mitochondrial (ASF/SF2-associated protein p32) (Glycoprotein gC1qBP) (C1qBP) (Hyaluronan-binding protein 1) (Mitochondrial matrix protein p32) (gC1q-R protein) (p33)                                       | 282 | C1QBP | 1 | 2 | 3 | 3.9  | 11   | 24.1 |
| 571 | -0.53 | 0.22  | 1.19 | P55884 | Eukaryotic translation initiation factor 3 subunit B (eIF3b) (Eukaryotic translation initiation factor 3 subunit 9) (Prt1 homolog) (hPrt1) (eIF-3-eta) (eIF3 p110) (eIF3 p116)                                                                                     | 814 | EIF3B | 3 | 3 | 3 | 4.4  | 4.2  | 4.4  |



|     |       |      |      |            |                                                                                                                                                                         |      |        |    |   |    |      |      |      |
|-----|-------|------|------|------------|-------------------------------------------------------------------------------------------------------------------------------------------------------------------------|------|--------|----|---|----|------|------|------|
| 572 | -0.53 | 1.54 | 1.06 | P52597     | Heterogeneous nuclear ribonucleoprotein F (hnRNP F) (Nucleolin-like protein mcs94-1) [Cleaved into: Heterogeneous nuclear ribonucleoprotein F, N-terminally processed]  | 415  | HNRNPF | 2  | 1 | 2  | 6.5  | 4.1  | 7.2  |
| 573 | -0.53 | 0.00 | 0.00 | A0A087X1D8 | Farnesyl pyrophosphate synthase (Fragment)                                                                                                                              | 174  | FDPS   | 2  | 0 | 0  | 17.8 | 0    | 0    |
| 574 | -0.53 | 0.02 | 0.05 | O00410     | Importin-5 (Imp5) (Importin subunit beta-3) (Karyopherin beta-3) (Ran-binding protein 5) (RanBP5)                                                                       | 1097 | IPO5   | 6  | 5 | 4  | 8.4  | 6.8  | 5.8  |
| 575 | -0.53 | 1.13 | 0.45 | Q92973     | Transportin-1 (Importin beta-2) (Karyopherin beta-2) (M9 region interaction protein) (MIP)                                                                              | 898  | TNPO1  | 6  | 3 | 6  | 8    | 3.6  | 6.9  |
| 576 | -0.52 | 0.95 | 0.42 | P38646     | Stress-70 protein, mitochondrial (75 kDa glucose-regulated protein) (GRP-75) (Heat shock 70 kDa protein 9) (Mortalin) (MOT) (Peptide-binding protein 74) (PBP74)        | 679  | HSPA9  | 11 | 6 | 14 | 22.7 | 12.4 | 27.4 |
| 577 | -0.52 | 0.22 | 0.71 | D6RAN4     | 60S ribosomal protein L9 (Fragment)                                                                                                                                     | 181  | RPL9   | 4  | 3 | 6  | 19.9 | 23.8 | 45.3 |
| 578 | -0.52 | 0.00 | 0.74 | P25205     | DNA replication licensing factor MCM3 (EC 3.6.4.12) (DNA polymerase alpha holoenzyme-associated protein P1) (P1-MCM3) (RLF subunit beta) (p102)                         | 808  | MCM3   | 3  | 0 | 3  | 4.5  | 0    | 4.2  |
| 579 | -0.52 | 0.00 | 0.47 | Q9Y3E7     | Charged multivesicular body protein 3 (Chromatin-modifying protein 3) (Neuroendocrine differentiation factor) (Vacuolar protein sorting-associated protein 24) (hVps24) | 222  | CHMP3  | 1  | 0 | 1  | 7.7  | 0    | 7.7  |

|     |       |       |      |        |                                                                                                                                                                     |      |        |    |    |    |      |      |      |
|-----|-------|-------|------|--------|---------------------------------------------------------------------------------------------------------------------------------------------------------------------|------|--------|----|----|----|------|------|------|
| 580 | -0.52 | 0.36  | 0.58 | O00299 | Chloride intracellular channel protein 1 (Chloride channel ABP) (Nuclear chloride ion channel 27) (NCC27) (Regulatory nuclear chloride ion channel protein) (hRNCC) | 241  | CLIC1  | 3  | 6  | 5  | 13.7 | 28.6 | 26.1 |
| 581 | -0.52 | 1.15  | 1.73 | P27824 | Calnexin (IP90) (Major histocompatibility complex class I antigen-binding protein p88) (p90)                                                                        | 592  | CANX   | 4  | 5  | 4  | 9.6  | 11.8 | 8.3  |
| 582 | -0.52 | 1.68  | 1.81 | P26599 | Polypyrimidine tract-binding protein 1 (PTB) (57 kDa RNA-binding protein PPTB-1) (Heterogeneous nuclear ribonucleoprotein I) (hnRNP I)                              | 531  | PTBP1  | 3  | 2  | 4  | 6.2  | 6.6  | 11.9 |
| 583 | -0.52 | 0.00  | 0.69 | H7C235 | Sphingomyelin phosphodiesterase 4 (Fragment)                                                                                                                        | 211  | SMPD4  | 1  | 0  | 1  | 4.3  | 0    | 4.3  |
| 584 | -0.52 | 0.00  | 0.02 | C9J363 | Programmed cell death 10, isoform CRA_b (Programmed cell death protein 10)                                                                                          | 149  | PDCD10 | 1  | 0  | 1  | 8.7  | 0    | 8.7  |
| 585 | -0.51 | 0.00  | 0.45 | M0QX85 | Nitric oxide synthase-interacting protein (Fragment)                                                                                                                | 96   | NOSIP  | 1  | 0  | 1  | 11.5 | 0    | 11.5 |
| 586 | -0.51 | 0.33  | 0.94 | Q9Y6C9 | Mitochondrial carrier homolog 2 (Met-induced mitochondrial protein)                                                                                                 | 303  | MTCH2  | 5  | 4  | 4  | 27.1 | 21.1 | 18.5 |
| 587 | -0.51 | 1.05  | 0.42 | Q9Y6N5 | Sulfide:quinone oxidoreductase, mitochondrial (SQOR) (EC 1.8.5.-)                                                                                                   | 450  | SQRDL  | 4  | 3  | 3  | 9.1  | 7.3  | 7.1  |
| 588 | -0.51 | 0.69  | 0.37 | Q01082 | Spectrin beta chain, non-erythrocytic 1 (Beta-II spectrin) (Fodrin beta chain) (Spectrin, non-erythroid beta chain 1)                                               | 2364 | SPTBN1 | 11 | 17 | 10 | 6.6  | 9.8  | 6.2  |
| 589 | -0.51 | -0.26 | 1.14 | C9JXB8 | 60S ribosomal protein L24                                                                                                                                           | 121  | RPL24  | 3  | 4  | 2  | 25.6 | 32.2 | 17.4 |
| 590 | -0.50 | 0.53  | 0.64 | P17987 | T-complex protein 1 subunit alpha (TCP-1-alpha) (CCT-alpha)                                                                                                         | 556  | TCP1   | 5  | 3  | 6  | 11.5 | 5.8  | 13.1 |

|     |       |      |       |        |                                                                                                                                                                                                                                                                                                                                                                                               |      |        |   |    |    |      |      |      |
|-----|-------|------|-------|--------|-----------------------------------------------------------------------------------------------------------------------------------------------------------------------------------------------------------------------------------------------------------------------------------------------------------------------------------------------------------------------------------------------|------|--------|---|----|----|------|------|------|
| 591 | -0.50 | 0.98 | 0.99  | P07602 | Prosaposin (Proactivator polypeptide) [Cleaved into: Saposin-A (Protein A); Saposin-B-Val; Saposin-B (Cerebroside sulfate activator) (CSAct) (Dispersin) (Sphingolipid activator protein 1) (SAP-1) (Sulfatide/GM1 activator); Saposin-C (A1 activator) (Co-beta-glucosidase) (Glucosylceramidase activator) (Sphingolipid activator protein 2) (SAP-2); Saposin-D (Component C) (Protein C)] | 524  | PSAP   | 1 | 6  | 2  | 2.5  | 12.6 | 5.3  |
| 592 | -0.50 | 0.27 | 0.31  | Q92688 | Acidic leucine-rich nuclear phosphoprotein 32 family member B (Acidic protein rich in leucines) (Putative HLA-DR-associated protein I-2) (PHAPI2) (Silver-stainable protein SSP29)                                                                                                                                                                                                            | 251  | ANP32B | 4 | 5  | 3  | 22.6 | 22.6 | 16.4 |
| 593 | -0.50 | 0.09 | -0.05 | P16435 | NADPH--cytochrome P450 reductase (CPR) (P450R) (EC 1.6.2.4)                                                                                                                                                                                                                                                                                                                                   | 677  | POR    | 4 | 1  | 2  | 8.4  | 1.3  | 3.4  |
| 594 | -0.50 | 0.15 | 0.76  | Q86VP6 | Cullin-associated NEDD8-dissociated protein 1 (Cullin-associated and neddylation-dissociated protein 1) (TBP-interacting protein of 120 kDa A) (TBP-interacting protein 120A) (p120 CAND1)                                                                                                                                                                                                    | 1230 | CAND1  | 9 | 10 | 13 | 9.6  | 11.1 | 14.2 |
| 595 | -0.50 | 0.00 | 0.94  | G5EA06 | 28S ribosomal protein S27, mitochondrial (Mitochondrial ribosomal protein S27, isoform CRA_b)                                                                                                                                                                                                                                                                                                 | 358  | MRPS27 | 2 | 0  | 1  | 7.5  | 0    | 3.4  |
| 596 | -0.50 | 0.00 | 0.08  | J3KTI3 | NAD kinase (Fragment)                                                                                                                                                                                                                                                                                                                                                                         | 74   | NADK   | 1 | 0  | 1  | 13.5 | 0    | 13.5 |
| 597 | -0.50 | 0.21 | 1.49  | O00151 | PDZ and LIM domain protein 1 (C-terminal LIM domain protein 1) (Elfin) (LIM domain protein CLP-36)                                                                                                                                                                                                                                                                                            | 329  | PDLIM1 | 2 | 1  | 3  | 8.8  | 3    | 17   |

|     |       |       |       |        |                                                                                                                                                                                                                    |     |        |   |    |   |      |      |      |
|-----|-------|-------|-------|--------|--------------------------------------------------------------------------------------------------------------------------------------------------------------------------------------------------------------------|-----|--------|---|----|---|------|------|------|
| 598 | -0.50 | 0.70  | 0.47  | P62877 | E3 ubiquitin-protein ligase RBX1 (EC 6.3.2.-) (Protein ZYP) (RING finger protein 75) (RING-box protein 1) (Rbx1) (Regulator of cullins 1) [Cleaved into: E3 ubiquitin-protein ligase RBX1, N-terminally processed] | 108 | RBX1   | 1 | 1  | 1 | 17.6 | 16.7 | 16.7 |
| 599 | -0.49 | -0.27 | 0.62  | I3L3P7 | 40S ribosomal protein S15a                                                                                                                                                                                         | 100 | RPS15A | 4 | 2  | 3 | 26   | 15   | 19   |
| 600 | -0.49 | -0.26 | 0.45  | P00338 | L-lactate dehydrogenase A chain (LDH-A) (EC 1.1.1.27) (Cell proliferation-inducing gene 19 protein) (LDH muscle subunit) (LDH-M) (Renal carcinoma antigen NY-REN-59)                                               | 332 | LDHA   | 8 | 15 | 8 | 21.1 | 46.4 | 20.2 |
| 601 | -0.49 | 0.00  | 0.50  | P30419 | Glycylpeptide N-tetradecanoyltransferase 1 (EC 2.3.1.97) (Myristoyl-CoA:protein N-myristoyltransferase 1) (NMT 1) (Type I N-myristoyltransferase) (Peptide N-myristoyltransferase 1)                               | 496 | NMT1   | 2 | 0  | 2 | 6.5  | 0    | 6.5  |
| 602 | -0.49 | 0.88  | 0.64  | Q96AG4 | Leucine-rich repeat-containing protein 59 (Ribosome-binding protein p34) (p34)                                                                                                                                     | 307 | LRRC59 | 4 | 5  | 6 | 17.6 | 21.5 | 25.1 |
| 603 | -0.49 | 0.01  | 0.43  | M0QZ52 | Calmodulin (Calmodulin 3 (Phosphorylase kinase, delta), isoform CRA_d)                                                                                                                                             | 83  | CALM3  | 4 | 2  | 3 | 62.7 | 20.5 | 62.7 |
| 604 | -0.49 | 0.00  | -0.63 | P51452 | Dual specificity protein phosphatase 3 (EC 3.1.3.16) (EC 3.1.3.48) (Dual specificity protein phosphatase VHR) (Vaccinia H1-related phosphatase) (VHR)                                                              | 185 | DUSP3  | 2 | 1  | 1 | 14.1 | 7.6  | 6.5  |
| 605 | -0.48 | 0.00  | 0.00  | Q96F63 | Coiled-coil domain-containing protein 97                                                                                                                                                                           | 343 | CCDC97 | 1 | 0  | 0 | 3.2  | 0    | 0    |
| 606 | -0.48 | 0.35  | 0.12  | P07737 | Profilin-1 (Epididymis tissue protein Li 184a) (Profilin I)                                                                                                                                                        | 140 | PFN1   | 8 | 7  | 6 | 48.6 | 61.4 | 37.1 |

|     |       |       |      |        |                                                                                                                                                                                             |      |        |   |   |   |      |      |      |
|-----|-------|-------|------|--------|---------------------------------------------------------------------------------------------------------------------------------------------------------------------------------------------|------|--------|---|---|---|------|------|------|
| 607 | -0.48 | -0.07 | 0.64 | P49207 | 60S ribosomal protein L34                                                                                                                                                                   | 117  | RPL34  | 1 | 2 | 1 | 6.8  | 14.5 | 6.8  |
| 608 | -0.48 | -0.71 | 0.00 | Q00535 | Cyclin-dependent-like kinase 5 (EC 2.7.11.1) (Cell division protein kinase 5) (Serine/threonine-protein kinase PSSALRE) (Tau protein kinase II catalytic subunit) (TPKII catalytic subunit) | 292  | CDK5   | 1 | 1 | 0 | 3.1  | 3.1  | 0    |
| 609 | -0.47 | 0.44  | 0.98 | P49721 | Proteasome subunit beta type-2 (EC 3.4.25.1) (Macropain subunit C7-I) (Multicatalytic endopeptidase complex subunit C7-I) (Proteasome component C7-I)                                       | 201  | PSMB2  | 2 | 6 | 5 | 14.4 | 28.4 | 28.9 |
| 610 | -0.47 | -0.17 | 0.28 | P43487 | Ran-specific GTPase-activating protein (Ran-binding protein 1) (RanBP1)                                                                                                                     | 201  | RANBP1 | 1 | 2 | 1 | 5.5  | 10   | 5.5  |
| 611 | -0.47 | 0.36  | 0.49 | P40227 | T-complex protein 1 subunit zeta (TCP-1-zeta) (Acute morphine dependence-related protein 2) (CCT-zeta-1) (HTR3) (Tcp20)                                                                     | 531  | CCT6A  | 9 | 3 | 8 | 24.5 | 10   | 24.1 |
| 612 | -0.47 | 0.21  | 0.75 | P49914 | 5-formyltetrahydrofolate cyclo-ligase (EC 6.3.3.2) (5,10-methenyl-tetrahydrofolate synthetase) (MTHFS) (Methenyl-THF synthetase)                                                            | 203  | MTHFS  | 1 | 2 | 2 | 4.4  | 10.3 | 10.3 |
| 613 | -0.47 | 0.72  | 1.08 | Q15366 | Poly(rC)-binding protein 2 (Alpha-CP2) (Heterogeneous nuclear ribonucleoprotein E2) (hnRNP E2)                                                                                              | 365  | PCBP2  | 1 | 5 | 3 | 3.9  | 18.8 | 13.6 |
| 614 | -0.47 | 0.73  | 0.61 | Q14152 | Eukaryotic translation initiation factor 3 subunit A (eIF3a) (Eukaryotic translation initiation factor 3 subunit 10) (eIF-3-theta) (eIF3 p167) (eIF3 p180) (eIF3 p185)                      | 1382 | EIF3A  | 8 | 8 | 8 | 6    | 6.7  | 6.4  |
| 615 | -0.46 | 0.00  | 0.75 | E7ESP4 | Integrin alpha-2                                                                                                                                                                            | 942  | ITGA2  | 1 | 0 | 1 | 1.4  | 0    | 1.1  |

|     |       |           |      |        |                                                                                                                                                                                                                                           |      |       |   |    |   |      |      |      |
|-----|-------|-----------|------|--------|-------------------------------------------------------------------------------------------------------------------------------------------------------------------------------------------------------------------------------------------|------|-------|---|----|---|------|------|------|
| 616 | -0.46 | 0.05      | 0.36 | P22234 | Multifunctional protein ADE2<br>[Includes:<br>Phosphoribosylaminoimidazole-<br>succinocarboxamide synthase (EC<br>6.3.2.6) (SAICAR synthetase);<br>Phosphoribosylaminoimidazole<br>carboxylase (EC 4.1.1.21) (AIR<br>carboxylase) (AIRC)] | 425  | PAICS | 6 | 6  | 5 | 15.5 | 15.5 | 12.5 |
| 617 | -0.46 | 0.11      | 0.36 | P12004 | Proliferating cell nuclear antigen<br>(PCNA) (Cyclin)                                                                                                                                                                                     | 261  | PCNA  | 9 | 5  | 8 | 51.3 | 25.7 | 36   |
| 618 | -0.46 | -<br>0.26 | 0.73 | P22392 | Nucleoside diphosphate kinase B<br>(NDK B) (NDP kinase B) (EC<br>2.7.4.6) (C-myc purine-binding<br>transcription factor PUF) (Histidine<br>protein kinase NDKB) (EC 2.7.13.3)<br>(nm23-H2)                                                | 152  | NME2  | 5 | 10 | 6 | 28.8 | 55.4 | 34.5 |
| 619 | -0.46 | -<br>0.35 | 1.44 | O15067 | Phosphoribosylformylglycinamide<br>synthase (FGAM synthase) (FGAMS)<br>(EC 6.3.5.3) (Formylglycinamide<br>ribonucleotide amidotransferase)<br>(FGAR amidotransferase) (FGAR-<br>AT) (Formylglycinamide ribotide<br>amidotransferase)      | 1338 | PFAS  | 2 | 1  | 3 | 2.2  | 0.7  | 3.2  |
| 620 | -0.46 | 1.26      | 0.00 | Q5T4L4 | 40S ribosomal protein S27                                                                                                                                                                                                                 | 66   | RPS27 | 1 | 2  | 0 | 19.7 | 36.4 | 0    |
| 621 | -0.46 | 0.47      | 0.72 | Q01813 | ATP-dependent 6-<br>phosphofructokinase, platelet type<br>(ATP-PFK) (PFK-P) (EC 2.7.1.11)<br>(6-phosphofructokinase type C)<br>(Phosphofructo-1-kinase isozyme C)<br>(PFK-C) (Phosphohexokinase)                                          | 784  | PFKP  | 4 | 4  | 4 | 5.5  | 4.3  | 5.5  |
| 622 | -0.46 | -<br>0.69 | 0.06 | P10599 | Thioredoxin (Trx) (ATL-derived<br>factor) (ADF) (Surface-associated<br>sulphydryl protein) (SASP)                                                                                                                                         | 105  | TXN   | 5 | 6  | 3 | 42.9 | 51.4 | 32.4 |

|     |       |       |       |        |                                                                                                                                                                                                                                                                                                                                                                                                                                                                    |      |         |    |    |    |      |      |      |
|-----|-------|-------|-------|--------|--------------------------------------------------------------------------------------------------------------------------------------------------------------------------------------------------------------------------------------------------------------------------------------------------------------------------------------------------------------------------------------------------------------------------------------------------------------------|------|---------|----|----|----|------|------|------|
| 623 | -0.46 | 0.87  | 0.57  | P32322 | Pyrroline-5-carboxylate reductase 1, mitochondrial (P5C reductase 1) (P5CR 1) (EC 1.5.1.2)                                                                                                                                                                                                                                                                                                                                                                         | 319  | PYCR1   | 1  | 1  | 2  | 3.4  | 3.4  | 7.2  |
| 624 | -0.45 | 0.00  | 0.00  | H0YLC0 | Tumor necrosis factor alpha-induced protein 2 (Fragment)                                                                                                                                                                                                                                                                                                                                                                                                           | 347  | TNFAIP2 | 1  | 0  | 0  | 3.2  | 0    | 0    |
| 625 | -0.45 | -0.32 | 0.38  | Q99598 | Translin-associated protein X (Translin-associated factor X)                                                                                                                                                                                                                                                                                                                                                                                                       | 290  | TSNAX   | 1  | 1  | 2  | 3.4  | 6.9  | 10.3 |
| 626 | -0.45 | 0.92  | 0.28  | F5H7F6 | Microsomal glutathione S-transferase 1 (Fragment)                                                                                                                                                                                                                                                                                                                                                                                                                  | 77   | MGST1   | 1  | 1  | 1  | 18.2 | 16.9 | 16.9 |
| 627 | -0.45 | -0.43 | 0.03  | D6RFZ2 | TBC1 domain family member 8B                                                                                                                                                                                                                                                                                                                                                                                                                                       | 419  | TBC1D8B | 1  | 1  | 1  | 2.6  | 2.6  | 2.6  |
| 628 | -0.45 | 0.68  | 1.74  | P49327 | Fatty acid synthase (EC 2.3.1.85) [Includes: [Acyl-carrier-protein] S-acetyltransferase (EC 2.3.1.38); [Acyl-carrier-protein] S-malonyltransferase (EC 2.3.1.39); 3-oxoacyl-[acyl-carrier-protein] synthase (EC 2.3.1.41); 3-oxoacyl-[acyl-carrier-protein] reductase (EC 1.1.1.100); 3-hydroxyacyl-[acyl-carrier-protein] dehydratase (EC 4.2.1.59); Enoyl-[acyl-carrier-protein] reductase (EC 1.3.1.39); Oleoyl-[acyl-carrier-protein] hydrolase (EC 3.1.2.14)] | 2511 | FASN    | 10 | 17 | 20 | 5.5  | 10.4 | 11.6 |
| 629 | -0.45 | 0.19  | 0.18  | O95373 | Importin-7 (Imp7) (Ran-binding protein 7) (RanBP7)                                                                                                                                                                                                                                                                                                                                                                                                                 | 1038 | IPO7    | 6  | 5  | 5  | 6.9  | 6.3  | 6.4  |
| 630 | -0.45 | 0.00  | -0.56 | D6RA82 | Annexin                                                                                                                                                                                                                                                                                                                                                                                                                                                            | 284  | ANXA3   | 3  | 0  | 3  | 14.4 | 0    | 12.3 |
| 631 | -0.45 | 0.48  | 0.71  | K9J957 | Proteasome activator complex subunit 3 (REG gamma-3 variant)                                                                                                                                                                                                                                                                                                                                                                                                       | 231  | PSME3   | 4  | 3  | 4  | 20.8 | 15.2 | 15.6 |

|     |       |       |      |        |                                                                                                                                                                                              |     |           |   |    |    |      |      |      |
|-----|-------|-------|------|--------|----------------------------------------------------------------------------------------------------------------------------------------------------------------------------------------------|-----|-----------|---|----|----|------|------|------|
| 632 | -0.45 | 1.04  | 0.52 | Q8NBS9 | Thioredoxin domain-containing protein 5 (Endoplasmic reticulum resident protein 46) (ER protein 46) (ERp46) (Thioredoxin-like protein p46)                                                   | 432 | TXNDC5    | 3 | 2  | 4  | 9    | 5.9  | 11.7 |
| 633 | -0.44 | 0.00  | 1.36 | Q9Y224 | UPF0568 protein C14orf166 (CLE7 homolog) (CLE)                                                                                                                                               | 244 | C14orf166 | 2 | 0  | 3  | 10.2 | 0    | 16.8 |
| 634 | -0.44 | -0.30 | 0.36 | P49588 | Alanine--tRNA ligase, cytoplasmic (EC 6.1.1.7) (Alanyl-tRNA synthetase) (AlaRS) (Renal carcinoma antigen NY-REN-42)                                                                          | 968 | AARS      | 7 | 4  | 7  | 8    | 4.3  | 8    |
| 635 | -0.44 | 0.85  | 0.75 | Q12931 | Heat shock protein 75 kDa, mitochondrial (HSP 75) (TNFR-associated protein 1) (Tumor necrosis factor type 1 receptor-associated protein) (TRAP-1)                                            | 704 | TRAP1     | 4 | 3  | 3  | 9.4  | 6.1  | 5.7  |
| 636 | -0.44 | 1.14  | 0.72 | P13667 | Protein disulfide-isomerase A4 (EC 5.3.4.1) (Endoplasmic reticulum resident protein 70) (ER protein 70) (ERp70) (Endoplasmic reticulum resident protein 72) (ER protein 72) (ERp-72) (ERp72) | 645 | PDIA4     | 7 | 7  | 11 | 14.9 | 13.5 | 23.4 |
| 637 | -0.44 | -0.52 | 0.56 | P52209 | 6-phosphogluconate dehydrogenase, decarboxylating (EC 1.1.1.44)                                                                                                                              | 483 | PGD       | 9 | 10 | 13 | 25.5 | 23.6 | 33.6 |
| 638 | -0.44 | -0.02 | 0.25 | B8ZZU8 | Transcription elongation factor B (SIII), polypeptide 2 (18kDa, elongin B), isoform CRA_b (Transcription elongation factor B polypeptide 2)                                                  | 113 | TCEB2     | 2 | 2  | 2  | 16.8 | 17.7 | 16.8 |



|     |       |       |       |        |                                                                                                                                                                        |     |       |    |    |    |      |      |      |
|-----|-------|-------|-------|--------|------------------------------------------------------------------------------------------------------------------------------------------------------------------------|-----|-------|----|----|----|------|------|------|
| 639 | -0.44 | 0.00  | 0.43  | Q2TAY7 | WD40 repeat-containing protein SMU1 (Smu-1 suppressor of mec-8 and unc-52 protein homolog) [Cleaved into: WD40 repeat-containing protein SMU1, N-terminally processed] | 513 | SMU1  | 1  | 0  | 1  | 1.9  | 0    | 1.9  |
| 640 | -0.44 | 0.00  | 0.05  | Q7L2H7 | Eukaryotic translation initiation factor 3 subunit M (eIF3m) (Fetal lung protein B5) (hFL-B5) (PCI domain-containing protein 1)                                        | 374 | EIF3M | 3  | 0  | 3  | 12   | 0    | 9.1  |
| 641 | -0.44 | -0.72 | 0.00  | Q9BRG1 | Vacuolar protein-sorting-associated protein 25 (hVps25) (Dermal papilla-derived protein 9) (ELL-associated protein of 20 kDa) (ESCRT-II complex subunit VPS25)         | 176 | VPS25 | 1  | 2  | 0  | 5.7  | 10.2 | 0    |
| 642 | -0.43 | 0.35  | 0.39  | Q14974 | Importin subunit beta-1 (Importin-90) (Karyopherin subunit beta-1) (Nuclear factor p97) (Pore targeting complex 97 kDa subunit) (PTAC97)                               | 876 | KPNB1 | 12 | 6  | 9  | 20   | 9.2  | 13.4 |
| 643 | -0.43 | 0.25  | 0.50  | P29401 | Transketolase (TK) (EC 2.2.1.1)                                                                                                                                        | 623 | TKT   | 20 | 13 | 14 | 40.6 | 31   | 23.1 |
| 644 | -0.43 | -0.05 | 0.39  | I3L397 | Eukaryotic translation initiation factor 5A (eIF-5A) (Fragment)                                                                                                        | 146 | EIF5A | 7  | 5  | 8  | 34.9 | 37   | 37.7 |
| 645 | -0.43 | -0.26 | 0.68  | Q04760 | Lactoylglutathione lyase (EC 4.4.1.5) (Aldoketomutase) (Glyoxalase I) (Glx I) (Ketone-aldehyde mutase) (Methylglyoxalase) (S-D-lactoylglutathione methylglyoxal lyase) | 184 | GLO1  | 3  | 4  | 4  | 19.5 | 26   | 29   |
| 646 | -0.42 | 1.22  | -0.22 | H3BN98 | Uncharacterized protein (Fragment)                                                                                                                                     | 237 |       | 3  | 2  | 2  | 11   | 8    | 8    |
| 647 | -0.42 | 0.00  | 0.16  | P46109 | Crk-like protein                                                                                                                                                       | 303 | CRKL  | 1  | 0  | 1  | 4    | 0    | 4    |
| 648 | -0.42 | 0.00  | 0.29  | A6NDG6 | Phosphoglycolate phosphatase (PGP) (PGPase) (EC 3.1.3.18) (EC 3.1.3.48)                                                                                                | 321 | PGP   | 2  | 0  | 1  | 9    | 0    | 4.7  |

|     |       |       |      |        |                                                                                                                                                                                                                                    |      |          |   |   |   |      |      |      |
|-----|-------|-------|------|--------|------------------------------------------------------------------------------------------------------------------------------------------------------------------------------------------------------------------------------------|------|----------|---|---|---|------|------|------|
| 649 | -0.42 | 0.42  | 1.36 | O75643 | U5 small nuclear ribonucleoprotein 200 kDa helicase (EC 3.6.4.13) (Activating signal cointegrator 1 complex subunit 3-like 1) (BRR2 homolog) (U5 snRNP-specific 200 kDa protein) (U5-200KD)                                        | 2136 | SNRNP200 | 1 | 3 | 3 | 0.5  | 1.7  | 1.9  |
| 650 | -0.42 | 0.49  | 0.14 | F8W914 | Reticulon                                                                                                                                                                                                                          | 345  | RTN4     | 5 | 5 | 4 | 18.8 | 18.8 | 15.1 |
| 651 | -0.42 | 0.00  | 0.00 | H7C131 | 3-ketoacyl-CoA thiolase, peroxisomal (Fragment)                                                                                                                                                                                    | 290  | ACAA1    | 1 | 0 | 0 | 4.5  | 0    | 0    |
| 652 | -0.42 | -0.27 | 0.40 | P00492 | Hypoxanthine-guanine phosphoribosyltransferase (HGPRT) (HGPRTase) (EC 2.4.2.8)                                                                                                                                                     | 218  | HPRT1    | 5 | 8 | 6 | 25.7 | 43.1 | 32.1 |
| 653 | -0.42 | 1.42  | 1.12 | P55084 | Trifunctional enzyme subunit beta, mitochondrial (TP-beta) [Includes: 3-ketoacyl-CoA thiolase (EC 2.3.1.16) (Acetyl-CoA acyltransferase) (Beta-ketothiolase)]                                                                      | 474  | HADHB    | 2 | 1 | 5 | 4.2  | 1.7  | 12   |
| 654 | -0.42 | -0.07 | 0.54 | P23526 | Adenosylhomocysteinase (AdoHcyase) (EC 3.3.1.1) (S-adenosyl-L-homocysteine hydrolase)                                                                                                                                              | 432  | AHCY     | 4 | 4 | 6 | 12   | 12   | 19.7 |
| 655 | -0.42 | 0.56  | 0.61 | H0YAM7 | Guanine nucleotide-binding protein subunit beta-2-like 1 (Fragment)                                                                                                                                                                | 247  | GNB2L1   | 3 | 7 | 3 | 25.5 | 43.7 | 25.5 |
| 656 | -0.41 | 0.50  | 0.89 | P09651 | Heterogeneous nuclear ribonucleoprotein A1 (hnRNP A1) (Helix-destabilizing protein) (Single-strand RNA-binding protein) (hnRNP core protein A1) [Cleaved into: Heterogeneous nuclear ribonucleoprotein A1, N-terminally processed] | 372  | HNRNPA1  | 2 | 6 | 3 | 14.2 | 29.6 | 13.9 |
| 657 | -0.41 | 0.38  | 0.51 | P47813 | Eukaryotic translation initiation factor 1A, X-chromosomal (eIF-1A X isoform) (Eukaryotic translation initiation factor 4C) (eIF-4C)                                                                                               | 144  | EIF1AX   | 3 | 4 | 5 | 26.4 | 25   | 33.3 |

|     |       |       |       |        |                                                                                                                                                                        |      |        |   |   |    |      |      |      |
|-----|-------|-------|-------|--------|------------------------------------------------------------------------------------------------------------------------------------------------------------------------|------|--------|---|---|----|------|------|------|
| 658 | -0.41 | 0.00  | 0.52  | Q92600 | Cell differentiation protein RCD1 homolog (Rcd-1) (CCR4-NOT transcription complex subunit 9)                                                                           | 299  | RQCD1  | 1 | 1 | 2  | 3.5  | 4.7  | 8.1  |
| 659 | -0.41 | -0.20 | 0.29  | H0YKT8 | Proteasome subunit beta type (EC 3.4.25.1) (Fragment)                                                                                                                  | 181  | PSMA4  | 4 | 3 | 3  | 30.9 | 14.9 | 18.8 |
| 660 | -0.40 | -0.48 | 0.19  | P55327 | Tumor protein D52 (Protein N8)                                                                                                                                         | 224  | TPD52  | 2 | 3 | 2  | 15.8 | 20.7 | 15.8 |
| 661 | -0.40 | -0.07 | 0.59  | P37837 | Transaldolase (EC 2.2.1.2)                                                                                                                                             | 337  | TALDO1 | 6 | 8 | 5  | 16.9 | 26.1 | 11.6 |
| 662 | -0.40 | 0.76  | 1.25  | O15355 | Protein phosphatase 1G (EC 3.1.3.16) (Protein phosphatase 1C) (Protein phosphatase 2C isoform gamma) (PP2C-gamma) (Protein phosphatase magnesium-dependent 1 gamma)    | 546  | PPM1G  | 1 | 1 | 3  | 2.2  | 2.2  | 6.6  |
| 663 | -0.40 | 0.37  | 1.67  | P18124 | 60S ribosomal protein L7                                                                                                                                               | 248  | RPL7   | 3 | 4 | 4  | 15.7 | 19.8 | 16.5 |
| 664 | -0.40 | -0.36 | -0.81 | Q13501 | Sequestosome-1 (EBI3-associated protein of 60 kDa) (EBIAP) (p60) (Phosphotyrosine-independent ligand for the Lck SH2 domain of 62 kDa) (Ubiquitin-binding protein p62) | 440  | SQSTM1 | 2 | 1 | 1  | 4.8  | 1.4  | 3.4  |
| 665 | -0.39 | 1.11  | 0.00  | G3V5X4 | Nesprin-2                                                                                                                                                              | 6818 | SYNE2  | 1 | 3 | 1  | 0.1  | 0.4  | 0.1  |
| 666 | -0.39 | 0.00  | 0.51  | Q9Y305 | Acyl-coenzyme A thioesterase 9, mitochondrial (Acyl-CoA thioesterase 9) (EC 3.1.2.-) (Acyl-CoA thioester hydrolase 9)                                                  | 439  | ACOT9  | 2 | 0 | 3  | 5.8  | 0    | 7.1  |
| 667 | -0.39 | 0.62  | 0.45  | E9PJK1 | Tetraspanin                                                                                                                                                            | 165  | CD81   | 3 | 2 | 3  | 35.8 | 23.6 | 35.8 |
| 668 | -0.39 | 0.14  | 0.60  | O15144 | Actin-related protein 2/3 complex subunit 2 (Arp2/3 complex 34 kDa subunit) (p34-ARC)                                                                                  | 300  | ARPC2  | 3 | 3 | 4  | 9.3  | 8.7  | 12.3 |
| 669 | -0.38 | 0.94  | 1.09  | Q9NSE4 | Isoleucine--tRNA ligase, mitochondrial (EC 6.1.1.5) (Isoleucyl-tRNA synthetase) (IleRS)                                                                                | 1012 | IARS2  | 6 | 6 | 10 | 6.9  | 6.9  | 12.2 |
| 670 | -0.38 | 1.06  | 1.14  | P31327 | Carbamoyl-phosphate synthase [ammonia], mitochondrial (EC 6.3.4.16) (Carbamoyl-phosphate synthetase I) (CPSase I)                                                      | 1500 | CPS1   | 2 | 5 | 4  | 1.7  | 4.1  | 3.3  |

|     |       |       |       |            |                                                                                                                                                                                                                                       |      |         |    |   |   |      |      |      |
|-----|-------|-------|-------|------------|---------------------------------------------------------------------------------------------------------------------------------------------------------------------------------------------------------------------------------------|------|---------|----|---|---|------|------|------|
| 671 | -0.38 | 1.13  | 0.65  | O95881     | Thioredoxin domain-containing protein 12 (EC 1.8.4.2) (Endoplasmic reticulum resident protein 18) (ER protein 18) (ERp18) (Endoplasmic reticulum resident protein 19) (ER protein 19) (ERp19) (Thioredoxin-like protein p19) (hTLP19) | 172  | TXNDC12 | 2  | 3 | 3 | 13.4 | 22.1 | 22.1 |
| 672 | -0.38 | -0.29 | 0.62  | H0YN26     | Acidic leucine-rich nuclear phosphoprotein 32 family member A                                                                                                                                                                         | 177  | ANP32A  | 3  | 3 | 3 | 18.6 | 18.6 | 11.9 |
| 673 | -0.38 | -0.43 | 0.29  | P15531     | Nucleoside diphosphate kinase A (NDK A) (NDP kinase A) (EC 2.7.4.6) (Granzyme A-activated DNase) (GAAD) (Metastasis inhibition factor nm23) (NM23-H1) (Tumor metastatic process-associated protein)                                   | 152  | NME1    | 5  | 6 | 5 | 36.8 | 42.8 | 36.8 |
| 674 | -0.38 | 0.07  | 0.31  | A0A087WZB3 | Proline and serine-rich protein 3                                                                                                                                                                                                     | 324  | PROSER3 | 1  | 1 | 1 | 2.8  | 2.8  | 2.8  |
| 675 | -0.38 | 2.00  | 1.11  | Q07955     | Serine/arginine-rich splicing factor 1 (Alternative-splicing factor 1) (ASF-1) (Splicing factor, arginine/serine-rich 1) (pre-mRNA-splicing factor SF2, P33 subunit)                                                                  | 248  | SRSF1   | 1  | 1 | 2 | 4    | 5.6  | 8.5  |
| 676 | -0.37 | 0.09  | 0.08  | P29692     | Elongation factor 1-delta (EF-1-delta) (Antigen NY-CO-4)                                                                                                                                                                              | 281  | EEF1D   | 4  | 6 | 3 | 20.3 | 30.2 | 11.7 |
| 677 | -0.37 | 0.33  | 0.91  | I3L1L3     | Myb-binding protein 1A (Fragment)                                                                                                                                                                                                     | 1252 | MYBBP1A | 3  | 4 | 4 | 2.7  | 3.7  | 3.7  |
| 678 | -0.37 | -0.21 | -0.12 | Q96A49     | Synapse-associated protein 1                                                                                                                                                                                                          | 352  | SYAP1   | 1  | 1 | 1 | 4.3  | 4.3  | 4.3  |
| 679 | -0.37 | 0.20  | 0.63  | P11216     | Glycogen phosphorylase, brain form (EC 2.4.1.1)                                                                                                                                                                                       | 843  | PYGB    | 3  | 3 | 6 | 3.1  | 3.1  | 8.4  |
| 680 | -0.37 | 0.25  | 1.33  | P55060     | Exportin-2 (Exp2) (Cellular apoptosis susceptibility protein) (Chromosome segregation 1-like protein) (Importin-alpha re-exporter)                                                                                                    | 971  | CSE1L   | 10 | 7 | 9 | 11.5 | 11.1 | 11.3 |

|     |       |       |      |        |                                                                                                                                                                                                                                                                                                          |      |        |    |    |    |      |      |      |
|-----|-------|-------|------|--------|----------------------------------------------------------------------------------------------------------------------------------------------------------------------------------------------------------------------------------------------------------------------------------------------------------|------|--------|----|----|----|------|------|------|
| 681 | -0.37 | -0.75 | 0.56 | D6RE83 | Ubiquitin carboxyl-terminal hydrolase (EC 3.4.19.12)                                                                                                                                                                                                                                                     | 207  | UCHL1  | 5  | 6  | 6  | 34.3 | 36.7 | 41.5 |
| 682 | -0.37 | -0.45 | 0.98 | F8WBS5 | 60S ribosomal protein L35a                                                                                                                                                                                                                                                                               | 55   | RPL35A | 1  | 1  | 1  | 16.4 | 16.4 | 16.4 |
| 683 | -0.36 | -0.06 | 0.35 | Q9BTT0 | Acidic leucine-rich nuclear phosphoprotein 32 family member E (LANP-like protein) (LANP-L)                                                                                                                                                                                                               | 268  | ANP32E | 2  | 4  | 2  | 15   | 20.9 | 15   |
| 684 | -0.36 | 1.07  | 0.60 | Q9GZT3 | SRA stem-loop-interacting RNA-binding protein, mitochondrial                                                                                                                                                                                                                                             | 109  | SLIRP  | 1  | 4  | 2  | 13.1 | 48.6 | 24.3 |
| 685 | -0.36 | 1.65  | 0.69 | P35232 | Prohibitin                                                                                                                                                                                                                                                                                               | 272  | PHB    | 3  | 7  | 2  | 9.9  | 37.9 | 6.6  |
| 686 | -0.36 | 0.63  | 0.47 | Q13813 | Spectrin alpha chain, non-erythrocytic 1 (Alpha-II spectrin) (Fodrin alpha chain) (Spectrin, non-erythroid alpha subunit)                                                                                                                                                                                | 2472 | SPTAN1 | 21 | 29 | 21 | 13.5 | 15.7 | 12.7 |
| 687 | -0.36 | -0.25 | 0.37 | Q15185 | Prostaglandin E synthase 3 (EC 5.3.99.3) (Cytosolic prostaglandin E2 synthase) (cPGES) (Hsp90 co-chaperone) (Progesterone receptor complex p23) (Telomerase-binding protein p23)                                                                                                                         | 160  | PTGES3 | 3  | 4  | 4  | 24.6 | 36.9 | 30.8 |
| 688 | -0.36 | 0.51  | 0.54 | Q9Y265 | RuvB-like 1 (EC 3.6.4.12) (49 kDa TATA box-binding protein-interacting protein) (49 kDa TBP-interacting protein) (54 kDa erythrocyte cytosolic protein) (ECP-54) (INO80 complex subunit H) (Nuclear matrix protein 238) (NMP 238) (Pontin 52) (TIP49a) (TIP60-associated protein 54-alpha) (TAP54-alpha) | 456  | RUVBL1 | 6  | 5  | 8  | 17.3 | 16   | 23   |
| 689 | -0.36 | 0.00  | 0.21 | Q15526 | Surfeit locus protein 1                                                                                                                                                                                                                                                                                  | 300  | SURF1  | 1  | 0  | 1  | 5.6  | 0    | 5.6  |
| 690 | -0.36 | 1.91  | 0.00 | Q6P1J9 | Parafibromin (Cell division cycle protein 73 homolog) (Hyperparathyroidism 2 protein)                                                                                                                                                                                                                    | 531  | CDC73  | 2  | 1  | 0  | 5.6  | 3.8  | 0    |

|     |       |       |       |        |                                                                                                                                                                                                                       |     |          |   |   |   |      |      |      |
|-----|-------|-------|-------|--------|-----------------------------------------------------------------------------------------------------------------------------------------------------------------------------------------------------------------------|-----|----------|---|---|---|------|------|------|
| 691 | -0.36 | 0.21  | 0.20  | P25786 | Proteasome subunit alpha type-1 (EC 3.4.25.1) (30 kDa prosomal protein) (PROS-30) (Macropain subunit C2) (Multicatalytic endopeptidase complex subunit C2) (Proteasome component C2) (Proteasome nu chain)            | 263 | PSMA1    | 4 | 6 | 5 | 17.9 | 26.2 | 20.2 |
| 692 | -0.35 | 0.15  | 0.66  | O94925 | Glutaminase kidney isoform, mitochondrial (GLS) (EC 3.5.1.2) (K-glutaminase) (L-glutamine amidohydrolase)                                                                                                             | 669 | GLS      | 3 | 1 | 4 | 6.2  | 1.7  | 10.5 |
| 693 | -0.35 | -0.36 | 0.48  | B1AK87 | Capping protein (Actin filament) muscle Z-line, beta, isoform CRA_a (F-actin-capping protein subunit beta)                                                                                                            | 260 | CAPZB    | 1 | 1 | 1 | 3.8  | 3.8  | 3.8  |
| 694 | -0.35 | -0.54 | -0.12 | C9JD53 | Isopentenyl-diphosphate Delta-isomerase 1 (Fragment)                                                                                                                                                                  | 120 | IDI1     | 1 | 1 | 1 | 10   | 10   | 10   |
| 695 | -0.35 | 0.71  | 0.43  | P50454 | Serpin H1 (47 kDa heat shock protein) (Arsenic-transactivated protein 3) (AsTP3) (Cell proliferation-inducing gene 14 protein) (Collagen-binding protein) (Colligin) (Rheumatoid arthritis-related antigen RA-A47)    | 418 | SERPINH1 | 4 | 7 | 4 | 12.7 | 27.3 | 12.2 |
| 696 | -0.35 | 0.50  | 1.34  | P52758 | Ribonuclease UK114 (EC 3.1.-.-) (14.5 kDa translational inhibitor protein) (p14.5) (Heat-responsive protein 12) (UK114 antigen homolog)                                                                               | 137 | HRSP12   | 1 | 3 | 1 | 7.3  | 27   | 7.3  |
| 697 | -0.35 | 0.23  | 0.54  | P49755 | Transmembrane emp24 domain-containing protein 10 (21 kDa transmembrane-trafficking protein) (S31III125) (S31II125) (Tmp-21-I) (Transmembrane protein Tmp21) (p23) (p24 family protein delta-1) (p24delta1) (p24delta) | 219 | TMED10   | 3 | 4 | 3 | 17.8 | 21   | 17.8 |

|     |       |       |       |        |                                                                                                                                                                          |     |          |   |   |   |      |      |      |
|-----|-------|-------|-------|--------|--------------------------------------------------------------------------------------------------------------------------------------------------------------------------|-----|----------|---|---|---|------|------|------|
| 698 | -0.35 | -0.11 | 0.63  | P26447 | Protein S100-A4 (Calvasculin) (Metastasin) (Placental calcium-binding protein) (Protein Mts1) (S100 calcium-binding protein A4)                                          | 101 | S100A4   | 2 | 5 | 2 | 18.8 | 33.7 | 18.8 |
| 699 | -0.35 | 0.00  | 1.34  | Q9UJS0 | Calcium-binding mitochondrial carrier protein Aralar2 (Citrin) (Mitochondrial aspartate glutamate carrier 2) (Solute carrier family 25 member 13)                        | 675 | SLC25A13 | 1 | 0 | 1 | 1.8  | 0    | 3.3  |
| 700 | -0.35 | 0.80  | -0.31 | P05783 | Keratin, type I cytoskeletal 18 (Cell proliferation-inducing gene 46 protein) (Cytokeratin-18) (CK-18) (Keratin-18) (K18)                                                | 430 | KRT18    | 6 | 7 | 5 | 24.7 | 21.4 | 20.5 |
| 701 | -0.35 | 0.88  | -0.08 | D6R967 | Inorganic pyrophosphatase 2, mitochondrial (Fragment)                                                                                                                    | 191 | PPA2     | 3 | 1 | 1 | 17.3 | 6.8  | 5.8  |
| 702 | -0.34 | -0.56 | 0.09  | H0YI98 | Dynactin subunit 2 (Fragment)                                                                                                                                            | 268 | DCTN2    | 1 | 1 | 1 | 3.4  | 3.4  | 3.4  |
| 703 | -0.34 | 0.80  | 0.40  | P24539 | ATP synthase F(0) complex subunit B1, mitochondrial (ATP synthase proton-transporting mitochondrial F(0) complex subunit B1) (ATP synthase subunit b) (ATPase subunit b) | 256 | ATP5F1   | 5 | 6 | 4 | 21.5 | 27   | 15.6 |
| 704 | -0.34 | 0.54  | 0.24  | Q9NP72 | Ras-related protein Rab-18                                                                                                                                               | 206 | RAB18    | 4 | 4 | 2 | 22.8 | 22.8 | 10.2 |
| 705 | -0.34 | -0.03 | -0.04 | K7EM62 | GPI ethanolamine phosphate transferase 1 (Fragment)                                                                                                                      | 257 | PIGN     | 1 | 1 | 1 | 6.2  | 6.2  | 6.2  |
| 706 | -0.34 | 0.00  | 0.36  | O43172 | U4/U6 small nuclear ribonucleoprotein Prp4 (PRP4 homolog) (hPrp4) (U4/U6 snRNP 60 kDa protein) (WD splicing factor Prp4)                                                 | 522 | PRPF4    | 1 | 0 | 1 | 2.5  | 0    | 2.5  |
| 707 | -0.33 | 0.27  | 0.65  | P51572 | B-cell receptor-associated protein 31 (BCR-associated protein 31) (Bap31) (6C6-AG tumor-associated antigen) (Protein CDM) (p28)                                          | 246 | BCAP31   | 6 | 5 | 4 | 26.8 | 22.4 | 18.7 |

|     |       |       |      |        |                                                                                                                                                                                                                         |      |        |    |    |    |      |      |      |
|-----|-------|-------|------|--------|-------------------------------------------------------------------------------------------------------------------------------------------------------------------------------------------------------------------------|------|--------|----|----|----|------|------|------|
| 708 | -0.33 | -0.31 | 0.68 | P35241 | Radixin                                                                                                                                                                                                                 | 583  | RDX    | 12 | 5  | 8  | 19.2 | 8.2  | 11.8 |
| 709 | -0.33 | 0.00  | 0.29 | P42166 | Lamina-associated polypeptide 2, isoform alpha (Thymopoietin isoform alpha) (TP alpha) (Thymopoietin-related peptide isoform alpha) (TPRP isoform alpha) [Cleaved into: Thymopoietin (TP) (Splenin); Thymopentin (TP5)] | 694  | TMPO   | 1  | 0  | 2  | 2.9  | 0    | 5.2  |
| 710 | -0.33 | 0.13  | 0.23 | Q9Y3A6 | Transmembrane emp24 domain-containing protein 5 (p24 family protein gamma-2) (p24gamma2) (p28)                                                                                                                          | 229  | TMED5  | 1  | 2  | 1  | 5.2  | 10   | 5.2  |
| 711 | -0.33 | 0.89  | 1.13 | P25787 | Proteasome subunit alpha type-2 (EC 3.4.25.1) (Macropain subunit C3) (Multicatalytic endopeptidase complex subunit C3) (Proteasome component C3)                                                                        | 234  | PSMA2  | 4  | 8  | 8  | 27.4 | 50   | 47.4 |
| 712 | -0.33 | 1.72  | 1.33 | P40939 | Trifunctional enzyme subunit alpha, mitochondrial (78 kDa gastrin-binding protein) (TP-alpha) [Includes: Long-chain enoyl-CoA hydratase (EC 4.2.1.17); Long chain 3-hydroxyacyl-CoA dehydrogenase (EC 1.1.1.211)]       | 763  | HADHA  | 8  | 3  | 9  | 15.6 | 5.8  | 15.5 |
| 713 | -0.32 | 0.32  | 0.84 | P46940 | Ras GTPase-activating-like protein IQGAP1 (p195)                                                                                                                                                                        | 1657 | IQGAP1 | 10 | 16 | 12 | 7.8  | 13.5 | 10.9 |
| 714 | -0.31 | 0.69  | 0.00 | Q86SX6 | Glutaredoxin-related protein 5, mitochondrial (Monothiol glutaredoxin-5)                                                                                                                                                | 157  | GLRX5  | 1  | 2  | 0  | 7    | 15.9 | 0    |
| 715 | -0.31 | 0.00  | 0.00 | F8WDI0 | Ubiquitin-like-conjugating enzyme ATG3                                                                                                                                                                                  | 74   | ATG3   | 1  | 0  | 1  | 12.2 | 0    | 12.2 |



|     |       |       |      |        |                                                                                                                                                                                                                                       |      |        |   |   |   |      |      |      |
|-----|-------|-------|------|--------|---------------------------------------------------------------------------------------------------------------------------------------------------------------------------------------------------------------------------------------|------|--------|---|---|---|------|------|------|
| 716 | -0.31 | 0.15  | 0.90 | Q9Y3B4 | Splicing factor 3B subunit 6 (Pre-mRNA branch site protein p14) (SF3b 14 kDa subunit) (SF3B14a) (Spliceosome-associated protein, 14-kDa) (Splicing factor 3b, subunit 6, 14kDa)                                                       | 125  | SF3B6  | 3 | 2 | 2 | 25.6 | 20.8 | 20.8 |
| 717 | -0.31 | 0.39  | 0.41 | Q15417 | Calponin-3 (Calponin, acidic isoform)                                                                                                                                                                                                 | 329  | CNN3   | 2 | 1 | 2 | 7.8  | 3.9  | 7.8  |
| 718 | -0.31 | 1.47  | 1.53 | Q81WJ2 | GRIP and coiled-coil domain-containing protein 2 (185 kDa Golgi coiled-coil protein) (GCC185) (CLL-associated antigen KW-11) (CTCL tumor antigen se1-1) (Ran-binding protein 2-like 4) (RanBP2L4) (Renal carcinoma antigen NY-REN-53) | 1684 | GCC2   | 1 | 2 | 1 | 0.5  | 1.1  | 0.5  |
| 719 | -0.31 | 0.00  | 0.16 | O43933 | Peroxisome biogenesis factor 1 (Peroxin-1) (Peroxisome biogenesis disorder protein 1)                                                                                                                                                 | 1283 | PEX1   | 1 | 0 | 1 | 0.9  | 0    | 0.9  |
| 720 | -0.31 | 0.00  | 0.07 | P41227 | N-alpha-acetyltransferase 10 (EC 2.3.1.-) (EC 2.3.1.88) (N-terminal acetyltransferase complex ARD1 subunit homolog A) (NatA catalytic subunit Naa10)                                                                                  | 235  | NAA10  | 2 | 0 | 2 | 6.4  | 0    | 6.4  |
| 721 | -0.31 | 0.00  | 0.96 | Q9P287 | BRCA2 and CDKN1A-interacting protein (P21- and CDK-associated protein 1) (Protein TOK-1)                                                                                                                                              | 314  | BCCIP  | 1 | 0 | 2 | 2.7  | 0    | 8.2  |
| 722 | -0.31 | 0.00  | 0.41 | P43686 | 26S protease regulatory subunit 6B (26S proteasome AAA-ATPase subunit RPT3) (MB67-interacting protein) (MIP224) (Proteasome 26S subunit ATPase 4) (Tat-binding protein 7) (TBP-7)                                                     | 418  | PSMC4  | 4 | 0 | 6 | 14.5 | 0    | 17.3 |
| 723 | -0.30 | -0.01 | 0.43 | P60842 | Eukaryotic initiation factor 4A-I (eIF-4A-I) (eIF4A-I) (EC 3.6.4.13) (ATP-dependent RNA helicase eIF4A-1)                                                                                                                             | 406  | EIF4A1 | 7 | 8 | 9 | 21.2 | 20.2 | 21.4 |

|     |       |       |      |        |                                                                                                                                                                                     |      |        |    |    |    |      |      |      |
|-----|-------|-------|------|--------|-------------------------------------------------------------------------------------------------------------------------------------------------------------------------------------|------|--------|----|----|----|------|------|------|
| 724 | -0.30 | 0.00  | 0.90 | D6RD67 | Methylcrotonoyl-CoA carboxylase beta chain, mitochondrial (Fragment)                                                                                                                | 286  | MCCC2  | 1  | 0  | 1  | 4.2  | 0    | 4.2  |
| 725 | -0.30 | 0.12  | 0.02 | F8WBH7 | Proteasome assembly chaperone 1                                                                                                                                                     | 63   | PSMG1  | 1  | 1  | 1  | 15.9 | 15.9 | 15.9 |
| 726 | -0.30 | 0.43  | 0.70 | Q9NPJ3 | Acyl-coenzyme A thioesterase 13 (Acyl-CoA thioesterase 13) (EC 3.1.2.-) (Thioesterase superfamily member 2) [Cleaved into: Acyl-coenzyme A thioesterase 13, N-terminally processed] | 140  | ACOT13 | 4  | 3  | 4  | 45.3 | 29.9 | 45.3 |
| 727 | -0.30 | 0.00  | 0.55 | E7EMC6 | Annexin                                                                                                                                                                             | 330  | ANXA6  | 2  | 0  | 1  | 7.9  | 0    | 3.3  |
| 728 | -0.30 | 0.58  | 0.36 | P62820 | Ras-related protein Rab-1A (YPT1-related protein)                                                                                                                                   | 205  | RAB1A  | 4  | 8  | 5  | 22.9 | 42.4 | 36.6 |
| 729 | -0.29 | -0.15 | 0.35 | P28066 | Proteasome subunit alpha type-5 (EC 3.4.25.1) (Macropain zeta chain) (Multicatalytic endopeptidase complex zeta chain) (Proteasome zeta chain)                                      | 241  | PSMA5  | 5  | 5  | 6  | 30.7 | 27   | 33.6 |
| 730 | -0.29 | 0.59  | 0.11 | P40925 | Malate dehydrogenase, cytoplasmic (EC 1.1.1.37) (Cytosolic malate dehydrogenase) (Diiodophenylpyruvate reductase) (EC 1.1.1.96)                                                     | 334  | MDH1   | 6  | 2  | 3  | 19.5 | 5.7  | 10.5 |
| 731 | -0.29 | 0.01  | 0.53 | Q9Y490 | Talin-1                                                                                                                                                                             | 2541 | TLN1   | 22 | 14 | 19 | 13.2 | 9.1  | 11.6 |
| 732 | -0.29 | 0.02  | 0.85 | P00558 | Phosphoglycerate kinase 1 (EC 2.7.2.3) (Cell migration-inducing gene 10 protein) (Primer recognition protein 2) (PRP 2)                                                             | 417  | PGK1   | 15 | 12 | 19 | 37.2 | 33.1 | 49.4 |
| 733 | -0.29 | 0.11  | 0.00 | F5GWX2 | Heme-binding protein 1                                                                                                                                                              | 133  | HEBP1  | 2  | 1  | 0  | 15.8 | 12.8 | 0    |

|     |       |       |       |        |                                                                                                                                                                                                                                                                               |     |         |    |    |    |      |      |      |
|-----|-------|-------|-------|--------|-------------------------------------------------------------------------------------------------------------------------------------------------------------------------------------------------------------------------------------------------------------------------------|-----|---------|----|----|----|------|------|------|
| 734 | -0.29 | 0.04  | 0.36  | P63010 | AP-2 complex subunit beta (AP105B) (Adaptor protein complex AP-2 subunit beta) (Adaptor-related protein complex 2 subunit beta) (Beta-2-adaptin) (Beta-adaptin) (Clathrin assembly protein complex 2 beta large chain) (Plasma membrane adaptor HA2/AP2 adaptin beta subunit) | 937 | AP2B1   | 5  | 2  | 3  | 7.7  | 3.6  | 4.4  |
| 735 | -0.29 | 0.23  | 0.20  | P06753 | Tropomyosin alpha-3 chain (Gamma-tropomyosin) (Tropomyosin-3) (Tropomyosin-5) (hTM5)                                                                                                                                                                                          | 285 | TPM3    | 6  | 5  | 7  | 25.4 | 20.6 | 27   |
| 736 | -0.29 | 0.34  | 0.71  | P61224 | Ras-related protein Rap-1b (GTP-binding protein smg p21B)                                                                                                                                                                                                                     | 184 | RAP1B   | 2  | 3  | 2  | 15.8 | 20.6 | 15.8 |
| 737 | -0.28 | 0.00  | 1.76  | P17844 | Probable ATP-dependent RNA helicase DDX5 (EC 3.6.4.13) (DEAD box protein 5) (RNA helicase p68)                                                                                                                                                                                | 614 | DDX5    | 2  | 0  | 1  | 3.4  | 0    | 2.6  |
| 738 | -0.28 | 1.67  | 0.37  | Q9H9B4 | Sideroflexin-1 (Tricarboxylate carrier protein) (TCC)                                                                                                                                                                                                                         | 322 | SFXN1   | 3  | 3  | 1  | 14.9 | 13.7 | 4.7  |
| 739 | -0.28 | -0.30 | 0.04  | P63104 | 14-3-3 protein zeta/delta (Protein kinase C inhibitor protein 1) (KCIP-1)                                                                                                                                                                                                     | 245 | YWHAZ   | 11 | 11 | 11 | 40.8 | 48.2 | 38.4 |
| 740 | -0.28 | 0.14  | 0.68  | O60701 | UDP-glucose 6-dehydrogenase (UDP-Glc dehydrogenase) (UDP-GlcDH) (UDPGDH) (EC 1.1.1.22)                                                                                                                                                                                        | 494 | UGDH    | 10 | 12 | 14 | 27.7 | 34.6 | 31   |
| 741 | -0.28 | -0.49 | -0.24 | Q9BRA2 | Thioredoxin domain-containing protein 17 (14 kDa thioredoxin-related protein) (TRP14) (Protein 42-9-9) (Thioredoxin-like protein 5)                                                                                                                                           | 123 | TXNDC17 | 2  | 2  | 2  | 15.4 | 15.4 | 15.4 |
| 742 | -0.28 | 0.69  | 0.41  | Q99613 | Eukaryotic translation initiation factor 3 subunit C (eIF3c) (Eukaryotic translation initiation factor 3 subunit 8) (eIF3 p110)                                                                                                                                               | 913 | EIF3C   | 2  | 2  | 1  | 2.3  | 2.2  | 1.2  |

|     |       |           |       |            |                                                                                                                                                                     |      |        |    |    |    |      |      |      |
|-----|-------|-----------|-------|------------|---------------------------------------------------------------------------------------------------------------------------------------------------------------------|------|--------|----|----|----|------|------|------|
| 743 | -0.28 | -<br>0.31 | 0.35  | B1ALC0     | Actin-related protein 2/3 complex subunit 5                                                                                                                         | 135  | ARPC5  | 1  | 1  | 1  | 9.6  | 9.6  | 9.6  |
| 744 | -0.28 | -<br>0.35 | 0.53  | Q96KP4     | Cytosolic non-specific dipeptidase (EC 3.4.13.18) (CNDP dipeptidase 2) (Glutamate carboxypeptidase-like protein 1) (Peptidase A)                                    | 475  | CNDP2  | 3  | 1  | 5  | 11   | 2    | 18.9 |
| 745 | -0.27 | 0.00      | 0.00  | Q9NY33     | Dipeptidyl peptidase 3 (EC 3.4.14.4) (Dipeptidyl aminopeptidase III) (Dipeptidyl arylamidase III) (Dipeptidyl peptidase III) (DPP III) (Enkephalinase B)            | 737  | DPP3   | 1  | 0  | 0  | 1.4  | 0    | 0    |
| 746 | -0.27 | -<br>0.73 | 0.09  | A0A0A0MR52 | Eukaryotic translation initiation factor 4 gamma 1                                                                                                                  | 1395 | EIF4G1 | 2  | 2  | 1  | 1.5  | 1.5  | 0.8  |
| 747 | -0.27 | 0.00      | -0.34 | B4DIH5     | COP9 signalosome complex subunit 2 (cDNA FLJ52928, highly similar to COP9 signalosome complex subunit 2)                                                            | 379  | COPS2  | 1  | 0  | 1  | 2.6  | 0    | 2.6  |
| 748 | -0.27 | 0.33      | 0.21  | P46779     | 60S ribosomal protein L28                                                                                                                                           | 137  | RPL28  | 2  | 5  | 4  | 13.9 | 29.9 | 22.6 |
| 749 | -0.27 | 0.46      | 0.69  | P78527     | DNA-dependent protein kinase catalytic subunit (DNA-PK catalytic subunit) (DNA-PKcs) (EC 2.7.11.1) (DNPK1) (p460)                                                   | 4128 | PRKDC  | 19 | 35 | 30 | 6.3  | 9.8  | 9    |
| 750 | -0.27 | -<br>0.34 | 0.25  | P62258     | 14-3-3 protein epsilon (14-3-3E)                                                                                                                                    | 255  | YWHAE  | 11 | 9  | 13 | 35.3 | 33.3 | 44.7 |
| 751 | -0.27 | 0.92      | 0.76  | P25705     | ATP synthase subunit alpha, mitochondrial                                                                                                                           | 553  | ATP5A1 | 9  | 6  | 12 | 18.5 | 14.7 | 28   |
| 752 | -0.26 | 0.32      | 0.15  | A6NNI4     | Tetraspanin                                                                                                                                                         | 159  | CD9    | 1  | 1  | 1  | 6.3  | 6.3  | 6.3  |
| 753 | -0.26 | 0.71      | 0.37  | P21796     | Voltage-dependent anion-selective channel protein 1 (VDAC-1) (hVDAC1) (Outer mitochondrial membrane protein porin 1) (Plasmalemmal porin) (Porin 31HL) (Porin 31HM) | 283  | VDAC1  | 6  | 9  | 8  | 25.8 | 33.6 | 34.3 |

|     |       |       |       |        |                                                                                                                                                                                                                             |      |         |   |   |   |      |      |      |
|-----|-------|-------|-------|--------|-----------------------------------------------------------------------------------------------------------------------------------------------------------------------------------------------------------------------------|------|---------|---|---|---|------|------|------|
| 754 | -0.26 | 0.00  | 1.05  | P30085 | UMP-CMP kinase (EC 2.7.4.14) (Deoxycytidylate kinase) (CK) (dCMP kinase) (Nucleoside-diphosphate kinase) (EC 2.7.4.6) (Uridine monophosphate/cytidine monophosphate kinase) (UMP/CMP kinase) (UMP/CMPK)                     | 196  | CMPK1   | 1 | 3 | 2 | 8.7  | 18.9 | 14.8 |
| 755 | -0.26 | 0.21  | -0.23 | P60953 | Cell division control protein 42 homolog (G25K GTP-binding protein)                                                                                                                                                         | 191  | CDC42   | 4 | 5 | 2 | 27.7 | 32.5 | 11   |
| 756 | -0.26 | -0.18 | 0.34  | P28074 | Proteasome subunit beta type-5 (EC 3.4.25.1) (Macropain epsilon chain) (Multicatalytic endopeptidase complex epsilon chain) (Proteasome chain 6) (Proteasome epsilon chain) (Proteasome subunit MB1) (Proteasome subunit X) | 263  | PSMB5   | 4 | 3 | 3 | 13.7 | 13.3 | 13.3 |
| 757 | -0.25 | 0.00  | -0.42 | F8VS02 | Alpha-aminoadipic semialdehyde dehydrogenase                                                                                                                                                                                | 475  | ALDH7A1 | 3 | 0 | 2 | 8.8  | 0    | 5.9  |
| 758 | -0.25 | 1.12  | 0.49  | P27105 | Erythrocyte band 7 integral membrane protein (Protein 7.2b) (Stomatin)                                                                                                                                                      | 288  | STOM    | 2 | 3 | 2 | 9    | 16.7 | 9    |
| 759 | -0.25 | 0.00  | 0.00  | Q9NX02 | NACHT, LRR and PYD domains-containing protein 2 (Nucleotide-binding site protein 1) (PYRIN domain and NACHT domain-containing protein 1) (PYRIN-containing APAF1-like protein 2)                                            | 1062 | NLRP2   | 1 | 0 | 0 | 1    | 0    | 0    |

|     |       |       |       |        |                                                                                                                                                                                                                                                                       |      |        |    |    |    |      |      |      |
|-----|-------|-------|-------|--------|-----------------------------------------------------------------------------------------------------------------------------------------------------------------------------------------------------------------------------------------------------------------------|------|--------|----|----|----|------|------|------|
| 760 | -0.25 | 0.99  | 0.00  | Q99643 | Succinate dehydrogenase cytochrome b560 subunit, mitochondrial (Integral membrane protein CII-3) (QPs-1) (QPs1) (Succinate dehydrogenase complex subunit C) (Succinate-ubiquinone oxidoreductase cytochrome B large subunit) (CYBL)                                   | 169  | SDHC   | 1  | 1  | 0  | 11.2 | 11.2 | 0    |
| 761 | -0.25 | -0.59 | -0.23 | P18206 | Vinculin (Metavinculin) (MV)                                                                                                                                                                                                                                          | 1134 | VCL    | 9  | 11 | 12 | 11.7 | 12.8 | 13.9 |
| 762 | -0.25 | 0.04  | 0.44  | E9PLK3 | Puromycin-sensitive aminopeptidase                                                                                                                                                                                                                                    | 915  | NPEPPS | 6  | 4  | 7  | 7.8  | 4.7  | 8.9  |
| 763 | -0.25 | 1.08  | 0.61  | Q14697 | Neutral alpha-glucosidase AB (EC 3.2.1.84) (Alpha-glucosidase 2) (Glucosidase II subunit alpha)                                                                                                                                                                       | 944  | GANAB  | 4  | 9  | 11 | 5.7  | 12.3 | 12.4 |
| 764 | -0.24 | -0.48 | 0.60  | P54652 | Heat shock-related 70 kDa protein 2 (Heat shock 70 kDa protein 2)                                                                                                                                                                                                     | 639  | HSPA2  | 5  | 6  | 5  | 8.8  | 10.3 | 9.5  |
| 765 | -0.24 | 0.50  | -0.09 | P35579 | Myosin-9 (Cellular myosin heavy chain, type A) (Myosin heavy chain 9) (Myosin heavy chain, non-muscle IIa) (Non-muscle myosin heavy chain A) (NMMHC-A) (Non-muscle myosin heavy chain IIa) (NMMHC II-a) (NMMHC-IIA)                                                   | 1960 | MYH9   | 15 | 10 | 16 | 9.3  | 6.9  | 9.9  |
| 766 | -0.24 | -0.68 | -0.10 | P08758 | Annexin A5 (Anchoring CII) (Annexin V) (Annexin-5) (Calphobindin I) (CBP-I) (Endonexin II) (Lipocortin V) (Placental anticoagulant protein 4) (PP4) (Placental anticoagulant protein I) (PAP-I) (Thromboplastin inhibitor) (Vascular anticoagulant-alpha) (VAC-alpha) | 320  | ANXA5  | 7  | 7  | 5  | 24.1 | 25   | 15.6 |
| 767 | -0.24 | 0.00  | 1.03  | Q12874 | Splicing factor 3A subunit 3 (SF3a60) (Spliceosome-associated protein 61) (SAP 61)                                                                                                                                                                                    | 501  | SF3A3  | 3  | 0  | 2  | 6.2  | 0    | 4.4  |

|     |       |       |      |        |                                                                                                                                                                                                                                                                         |      |        |    |    |    |      |      |      |
|-----|-------|-------|------|--------|-------------------------------------------------------------------------------------------------------------------------------------------------------------------------------------------------------------------------------------------------------------------------|------|--------|----|----|----|------|------|------|
| 768 | -0.24 | -0.57 | 0.53 | P15121 | Aldose reductase (AR) (EC 1.1.1.21) (Aldehyde reductase) (Aldo-keto reductase family 1 member B1)                                                                                                                                                                       | 316  | AKR1B1 | 10 | 12 | 10 | 38.3 | 49.7 | 47.8 |
| 769 | -0.24 | 1.22  | 0.98 | Q12797 | Aspartyl/asparaginyl beta-hydroxylase (EC 1.14.11.16) (Aspartate beta-hydroxylase) (ASP beta-hydroxylase) (Peptide-aspartate beta-dioxygenase)                                                                                                                          | 758  | ASPH   | 3  | 5  | 4  | 4.7  | 10.2 | 11.9 |
| 770 | -0.24 | 0.30  | 0.55 | P63092 | Guanine nucleotide-binding protein G(s) subunit alpha isoforms short (Adenylate cyclase-stimulating G alpha protein)                                                                                                                                                    | 394  | GNAS   | 3  | 2  | 2  | 7.9  | 5.3  | 5.3  |
| 771 | -0.24 | 0.00  | 0.00 | P61086 | Ubiquitin-conjugating enzyme E2 K (EC 6.3.2.19) (Huntingtin-interacting protein 2) (HIP-2) (Ubiquitin carrier protein) (Ubiquitin-conjugating enzyme E2-25 kDa) (Ubiquitin-conjugating enzyme E2(25K)) (Ubiquitin-conjugating enzyme E2-25K) (Ubiquitin-protein ligase) | 200  | UBE2K  | 3  | 0  | 0  | 26.5 | 0    | 0    |
| 772 | -0.24 | 0.01  | 0.20 | P31946 | 14-3-3 protein beta/alpha (Protein 1054) (Protein kinase C inhibitor protein 1) (KCIP-1) [Cleaved into: 14-3-3 protein beta/alpha, N-terminally processed]                                                                                                              | 246  | YWHAB  | 6  | 8  | 8  | 30.7 | 43.9 | 38.9 |
| 773 | -0.24 | 0.00  | 0.00 | Q96K76 | Ubiquitin carboxyl-terminal hydrolase 47 (EC 3.4.19.12) (Deubiquitinating enzyme 47) (Ubiquitin thioesterase 47) (Ubiquitin-specific-processing protease 47)                                                                                                            | 1375 | USP47  | 1  | 0  | 0  | 0.7  | 0    | 0    |

|     |       |       |       |        |                                                                                                                                                                                                                           |      |        |   |   |   |      |      |      |
|-----|-------|-------|-------|--------|---------------------------------------------------------------------------------------------------------------------------------------------------------------------------------------------------------------------------|------|--------|---|---|---|------|------|------|
| 774 | -0.24 | -0.25 | 0.00  | P30043 | Flavin reductase (NADPH) (FR) (EC 1.5.1.30) (Biliverdin reductase B) (BVR-B) (EC 1.3.1.24) (Biliverdin-IX beta-reductase) (Green heme-binding protein) (GHBP) (NADPH-dependent diaphorase) (NADPH-flavin reductase) (FLR) | 206  | BLVRB  | 2 | 3 | 0 | 11.7 | 22.8 | 0    |
| 775 | -0.24 | -0.52 | 1.17  | Q8J015 | 60S ribosomal protein L13a (Ribosomal protein L13a) (Ribosomal protein L13a, isoform CRA_b)                                                                                                                               | 142  | RPL13a | 3 | 2 | 4 | 14.8 | 7    | 20.4 |
| 776 | -0.24 | 0.00  | 0.63  | Q15006 | ER membrane protein complex subunit 2 (Tetratricopeptide repeat protein 35) (TPR repeat protein 35)                                                                                                                       | 297  | EMC2   | 1 | 0 | 1 | 6.4  | 0    | 6.4  |
| 777 | -0.24 | 1.32  | 0.00  | E9PH64 | NADH dehydrogenase [ubiquinone] 1 beta subcomplex subunit 9                                                                                                                                                               | 168  | NDUFB9 | 1 | 3 | 0 | 8.3  | 22   | 0    |
| 778 | -0.23 | 0.00  | 1.40  | Q92820 | Gamma-glutamyl hydrolase (EC 3.4.19.9) (Conjugase) (GH) (Gamma-Glu-X carboxypeptidase)                                                                                                                                    | 318  | GGH    | 1 | 0 | 2 | 4.1  | 0    | 7.2  |
| 779 | -0.23 | -0.22 | 0.20  | O00231 | 26S proteasome non-ATPase regulatory subunit 11 (26S proteasome regulatory subunit RPN6) (26S proteasome regulatory subunit S9) (26S proteasome regulatory subunit p44.5)                                                 | 422  | PSMD11 | 7 | 5 | 7 | 20.4 | 14   | 20.1 |
| 780 | -0.23 | -0.02 | 0.89  | E5RI99 | 60S ribosomal protein L30 (Fragment)                                                                                                                                                                                      | 114  | RPL30  | 4 | 3 | 4 | 32.5 | 35.1 | 32.5 |
| 781 | -0.23 | 0.84  | 0.64  | P52701 | DNA mismatch repair protein Msh6 (hMSH6) (G/T mismatch-binding protein) (GTBP) (GTMBP) (MutS-alpha 160 kDa subunit) (p160)                                                                                                | 1360 | MSH6   | 2 | 3 | 2 | 2.4  | 3.4  | 2.4  |
| 782 | -0.23 | -0.04 | -0.02 | M0R0F0 | 40S ribosomal protein S5 (Fragment)                                                                                                                                                                                       | 200  | RPS5   | 1 | 2 | 1 | 7.5  | 12   | 7.5  |
| 783 | -0.23 | 0.00  | 0.00  | E9PDQ8 | Succinyl-CoA ligase [GDP-forming] subunit beta, mitochondrial                                                                                                                                                             | 379  | SUCLG2 | 1 | 0 | 0 | 4    | 0    | 0    |



|     |       |       |       |        |                                                                                                                                                                                                                                                                                                    |     |         |   |   |    |      |      |      |
|-----|-------|-------|-------|--------|----------------------------------------------------------------------------------------------------------------------------------------------------------------------------------------------------------------------------------------------------------------------------------------------------|-----|---------|---|---|----|------|------|------|
| 784 | -0.23 | 0.00  | 0.11  | P11766 | Alcohol dehydrogenase class-3 (EC 1.1.1.1) (Alcohol dehydrogenase 5) (Alcohol dehydrogenase class chi chain) (Alcohol dehydrogenase class-III) (Glutathione-dependent formaldehyde dehydrogenase) (FALDH) (FDH) (GSH-FDH) (EC 1.1.1.-) (S-(hydroxymethyl)glutathione dehydrogenase) (EC 1.1.1.284) | 374 | ADH5    | 4 | 0 | 3  | 11.5 | 0    | 9.9  |
| 785 | -0.23 | 0.33  | 0.66  | Q9Y230 | RuvB-like 2 (EC 3.6.4.12) (48 kDa TATA box-binding protein-interacting protein) (48 kDa TBP-interacting protein) (51 kDa erythrocyte cytosolic protein) (ECP-51) (INO80 complex subunit J) (Repressing pontin 52) (Reptin 52) (TIP49b) (TIP60-associated protein 54-beta) (TAP54-beta)             | 463 | RUVBL2  | 6 | 4 | 8  | 15.8 | 10.2 | 22.9 |
| 786 | -0.23 | -0.05 | -0.60 | K7EL96 | Perilipin-3 (Fragment)                                                                                                                                                                                                                                                                             | 172 | PLIN3   | 2 | 2 | 3  | 15.7 | 18   | 24.4 |
| 787 | -0.22 | -0.78 | 0.62  | Q16719 | Kynureninase (EC 3.7.1.3) (L-kynurenine hydrolase)                                                                                                                                                                                                                                                 | 465 | KYNU    | 7 | 8 | 12 | 20.6 | 21.5 | 37   |
| 788 | -0.22 | -0.09 | -0.24 | P31949 | Protein S100-A11 (Calgizzarin) (Metastatic lymph node gene 70 protein) (MLN 70) (Protein S100-C) (S100 calcium-binding protein A11) [Cleaved into: Protein S100-A11, N-terminally processed]                                                                                                       | 105 | S100A11 | 1 | 3 | 3  | 15.2 | 34.3 | 34.3 |
| 789 | -0.22 | -0.33 | 0.70  | P48163 | NADP-dependent malic enzyme (NADP-ME) (EC 1.1.1.40) (Malic enzyme 1)                                                                                                                                                                                                                               | 572 | ME1     | 1 | 1 | 1  | 3.6  | 4.2  | 3.6  |
| 790 | -0.22 | -0.72 | -0.26 | Q14019 | Coactosin-like protein                                                                                                                                                                                                                                                                             | 142 | COTL1   | 4 | 3 | 4  | 15.5 | 19.7 | 15.5 |

|     |       |       |      |        |                                                                                                                                                                                                                                                                                                                                                                          |     |         |   |   |   |      |      |      |
|-----|-------|-------|------|--------|--------------------------------------------------------------------------------------------------------------------------------------------------------------------------------------------------------------------------------------------------------------------------------------------------------------------------------------------------------------------------|-----|---------|---|---|---|------|------|------|
| 791 | -0.22 | 0.00  | 0.62 | Q92905 | COP9 signalosome complex subunit 5 (SGN5) (Signalosome subunit 5) (EC 3.4.-.-) (Jun activation domain-binding protein 1)                                                                                                                                                                                                                                                 | 334 | COP55   | 1 | 0 | 1 | 4.5  | 0    | 4.5  |
| 792 | -0.21 | -0.15 | 0.19 | G3V295 | Proteasome subunit alpha type (EC 3.4.25.1)                                                                                                                                                                                                                                                                                                                              | 203 | PSMA6   | 2 | 7 | 4 | 10.3 | 36.9 | 21.7 |
| 793 | -0.21 | 0.61  | 0.47 | E9PEX6 | Dihydrolipoyl dehydrogenase (EC 1.8.1.4)                                                                                                                                                                                                                                                                                                                                 | 486 | DLD     | 3 | 2 | 5 | 8.8  | 5.1  | 11.7 |
| 794 | -0.21 | 0.39  | 0.00 | P19525 | Interferon-induced, double-stranded RNA-activated protein kinase (EC 2.7.11.1) (Eukaryotic translation initiation factor 2-alpha kinase 2) (eIF-2A protein kinase 2) (Interferon-inducible RNA-dependent protein kinase) (P1/eIF-2A protein kinase) (Protein kinase RNA-activated) (PKR) (Protein kinase R) (Tyrosine-protein kinase EIF2AK2) (EC 2.7.10.2) (p68 kinase) | 551 | EIF2AK2 | 1 | 1 | 0 | 2.4  | 2.4  | 0    |
| 795 | -0.21 | 0.36  | 0.64 | P28070 | Proteasome subunit beta type-4 (EC 3.4.25.1) (26 kDa prosomal protein) (HsBPROS26) (PROS-26) (Macropain beta chain) (Multicatalytic endopeptidase complex beta chain) (Proteasome beta chain) (Proteasome chain 3) (Hsn3)                                                                                                                                                | 264 | PSMB4   | 3 | 4 | 2 | 20.8 | 25.4 | 15.9 |
| 796 | -0.21 | -0.14 | 1.26 | P09012 | U1 small nuclear ribonucleoprotein A (U1 snRNP A) (U1-A) (U1A)                                                                                                                                                                                                                                                                                                           | 282 | SNRPA   | 1 | 4 | 2 | 2.8  | 15.6 | 9.6  |
| 797 | -0.21 | 0.27  | 1.29 | P61586 | Transforming protein RhoA (Rho cDNA clone 12) (h12)                                                                                                                                                                                                                                                                                                                      | 193 | RHOA    | 5 | 5 | 5 | 35.2 | 24.4 | 24.4 |

|     |       |       |       |        |                                                                                                                                                                                                                                               |     |          |    |    |    |      |      |      |
|-----|-------|-------|-------|--------|-----------------------------------------------------------------------------------------------------------------------------------------------------------------------------------------------------------------------------------------------|-----|----------|----|----|----|------|------|------|
| 798 | -0.21 | 0.23  | 0.28  | P25788 | Proteasome subunit alpha type-3 (EC 3.4.25.1) (Macropain subunit C8) (Multicatalytic endopeptidase complex subunit C8) (Proteasome component C8)                                                                                              | 255 | PSMA3    | 3  | 2  | 3  | 8.5  | 8.1  | 8.5  |
| 799 | -0.21 | 1.04  | 0.46  | P12236 | ADP/ATP translocase 3 (ADP,ATP carrier protein 3) (ADP,ATP carrier protein, isoform T2) (ANT 2) (Adenine nucleotide translocator 3) (ANT 3) (Solute carrier family 25 member 6) [Cleaved into: ADP/ATP translocase 3, N-terminally processed] | 298 | SLC25A6  | 8  | 8  | 8  | 27.2 | 29.5 | 26.2 |
| 800 | -0.20 | 0.00  | 0.17  | O95202 | LETM1 and EF-hand domain-containing protein 1, mitochondrial (Leucine zipper-EF-hand-containing transmembrane protein 1)                                                                                                                      | 739 | LETM1    | 2  | 0  | 2  | 2.7  | 0    | 2.7  |
| 801 | -0.20 | -0.43 | 0.13  | P23528 | Cofilin-1 (18 kDa phosphoprotein) (p18) (Cofilin, non-muscle isoform)                                                                                                                                                                         | 166 | CFL1     | 12 | 10 | 13 | 57.2 | 63.9 | 57.2 |
| 802 | -0.20 | 0.00  | -0.02 | P21283 | V-type proton ATPase subunit C 1 (V-ATPase subunit C 1) (Vacuolar proton pump subunit C 1)                                                                                                                                                    | 382 | ATP6V1C1 | 1  | 0  | 1  | 4.2  | 0    | 4.2  |
| 803 | -0.20 | -0.29 | 0.86  | P33176 | Kinesin-1 heavy chain (Conventional kinesin heavy chain) (Ubiquitous kinesin heavy chain) (UKHC)                                                                                                                                              | 963 | KIF5B    | 2  | 2  | 1  | 2.4  | 2.5  | 1    |
| 804 | -0.20 | -0.31 | 0.11  | R4GMY8 | Transcription elongation factor B polypeptide 1                                                                                                                                                                                               | 65  | TCEB1    | 1  | 2  | 1  | 18.5 | 33.8 | 18.5 |
| 805 | -0.20 | -0.29 | 0.24  | H7C3I1 | Hsc70-interacting protein (Fragment)                                                                                                                                                                                                          | 146 | ST13     | 1  | 2  | 3  | 6.8  | 18.5 | 25.3 |
| 806 | -0.20 | 0.00  | 0.24  | O14828 | Secretory carrier-associated membrane protein 3 (Secretory carrier membrane protein 3)                                                                                                                                                        | 347 | SCAMP3   | 1  | 0  | 1  | 6.2  | 0    | 6.2  |
| 807 | -0.20 | 0.44  | 0.15  | P20340 | Ras-related protein Rab-6A (Rab-6)                                                                                                                                                                                                            | 208 | RAB6A    | 4  | 3  | 4  | 23.6 | 17.8 | 22.6 |

|     |       |       |       |        |                                                                                                                                                                                                                                                                                                                       |      |          |   |   |   |      |     |      |
|-----|-------|-------|-------|--------|-----------------------------------------------------------------------------------------------------------------------------------------------------------------------------------------------------------------------------------------------------------------------------------------------------------------------|------|----------|---|---|---|------|-----|------|
| 808 | -0.20 | -0.41 | 0.10  | Q8WUM4 | Programmed cell death 6-interacting protein (PDCD6-interacting protein) (ALG-2-interacting protein 1) (ALG-2-interacting protein X) (Hp95)                                                                                                                                                                            | 868  | PDCD6IP  | 5 | 3 | 6 | 5.8  | 5.2 | 6.9  |
| 809 | -0.20 | 0.00  | -0.12 | P35237 | Serpin B6 (Cytoplasmic antiproteinase) (CAP) (Peptidase inhibitor 6) (PI-6) (Placental thrombin inhibitor)                                                                                                                                                                                                            | 376  | SERPINB6 | 3 | 0 | 2 | 12.5 | 0   | 8.5  |
| 810 | -0.19 | 0.74  | 0.23  | P07814 | Bifunctional glutamate/proline--tRNA ligase (Bifunctional aminoacyl-tRNA synthetase) (Cell proliferation-inducing gene 32 protein) (Glutamyl-prolyl-tRNA synthetase) [Includes: Glutamate--tRNA ligase (EC 6.1.1.17) (Glutamyl-tRNA synthetase) (GluRS); Proline--tRNA ligase (EC 6.1.1.15) (Prolyl-tRNA synthetase)] | 1512 | EPRS     | 5 | 4 | 4 | 4.4  | 3.6 | 3.3  |
| 811 | -0.19 | 0.33  | 0.37  | Q9P2J5 | Leucine--tRNA ligase, cytoplasmic (EC 6.1.1.4) (Leucyl-tRNA synthetase) (LeuRS)                                                                                                                                                                                                                                       | 1176 | LARS     | 5 | 9 | 6 | 5.1  | 9.6 | 6    |
| 812 | -0.19 | 0.00  | -0.31 | Q7Z406 | Myosin-14 (Myosin heavy chain 14) (Myosin heavy chain, non-muscle IIc) (Non-muscle myosin heavy chain IIc) (NMHC II-C)                                                                                                                                                                                                | 1995 | MYH14    | 2 | 2 | 2 | 1.1  | 1.3 | 1.1  |
| 813 | -0.19 | -0.13 | 1.09  | Q13347 | Eukaryotic translation initiation factor 3 subunit I (eIF3i) (Eukaryotic translation initiation factor 3 subunit 2) (TGF-beta receptor-interacting protein 1) (TRIP-1) (eIF-3-beta) (eIF3 p36)                                                                                                                        | 325  | EIF3I    | 1 | 1 | 4 | 3.4  | 2.8 | 21.5 |
| 814 | -0.19 | -0.39 | 0.16  | Q02809 | Procollagen-lysine,2-oxoglutarate 5-dioxygenase 1 (EC 1.14.11.4) (Lysyl hydroxylase 1) (LH1)                                                                                                                                                                                                                          | 727  | PLOD1    | 1 | 1 | 1 | 2.1  | 2.1 | 2.1  |

|     |       |       |       |        |                                                                                                                                                                                                                      |      |           |   |   |   |      |      |      |
|-----|-------|-------|-------|--------|----------------------------------------------------------------------------------------------------------------------------------------------------------------------------------------------------------------------|------|-----------|---|---|---|------|------|------|
| 815 | -0.19 | 0.00  | 1.22  | B4DT28 | Heterogeneous nuclear ribonucleoprotein R (Heterogeneous nuclear ribonucleoprotein R, isoform CRA_a) (cDNA FLJ54544, highly similar to Heterogeneous nuclear ribonucleoprotein R)                                    | 494  | HNRNPR    | 2 | 1 | 3 | 4.9  | 2.6  | 7.1  |
| 816 | -0.18 | -0.50 | -0.48 | Q5VYK3 | Proteasome-associated protein ECM29 homolog (Ecm29)                                                                                                                                                                  | 1845 | ECM29     | 2 | 1 | 1 | 1.4  | 0.7  | 0.7  |
| 817 | -0.18 | 0.00  | 0.11  | Q58FF6 | Putative heat shock protein HSP 90-beta 4                                                                                                                                                                            | 505  | HSP90AB4P | 5 | 1 | 5 | 7.7  | 2.4  | 7.7  |
| 818 | -0.18 | -0.21 | 0.33  | Q5TA02 | Glutathione S-transferase omega-1 (Fragment)                                                                                                                                                                         | 200  | GSTO1     | 2 | 4 | 4 | 11   | 20   | 20.5 |
| 819 | -0.18 | 0.27  | 0.31  | P39019 | 40S ribosomal protein S19                                                                                                                                                                                            | 145  | RPS19     | 3 | 6 | 3 | 18.6 | 34.5 | 18.6 |
| 820 | -0.18 | 0.00  | 0.04  | C9J0K5 | Cytoplasmic protein NCK1 (Fragment)                                                                                                                                                                                  | 75   | NCK1      | 1 | 0 | 1 | 12   | 0    | 12   |
| 821 | -0.17 | -0.72 | -0.01 | Q15819 | Ubiquitin-conjugating enzyme E2 variant 2 (DDVit 1) (Enterocyte differentiation-associated factor 1) (EDAF-1) (Enterocyte differentiation-promoting factor 1) (EDPF-1) (MMS2 homolog) (Vitamin D3-inducible protein) | 145  | UBE2V2    | 2 | 2 | 1 | 11.7 | 11.7 | 6.9  |
| 822 | -0.17 | -0.90 | 0.72  | O43143 | Pre-mRNA-splicing factor ATP-dependent RNA helicase DHX15 (EC 3.6.4.13) (ATP-dependent RNA helicase #46) (DEAH box protein 15)                                                                                       | 795  | DHX15     | 2 | 1 | 2 | 2.9  | 1.5  | 2.9  |
| 823 | -0.17 | -0.10 | 0.32  | Q9Y5S9 | RNA-binding protein 8A (Binder of OVCA1-1) (BOV-1) (RNA-binding motif protein 8A) (RNA-binding protein Y14) (Ribonucleoprotein RBM8A)                                                                                | 174  | RBM8A     | 1 | 2 | 1 | 6.4  | 11   | 6.4  |

|     |       |       |       |            |                                                                                                                                                                                                                     |      |              |   |   |   |      |      |      |
|-----|-------|-------|-------|------------|---------------------------------------------------------------------------------------------------------------------------------------------------------------------------------------------------------------------|------|--------------|---|---|---|------|------|------|
| 824 | -0.17 | -0.07 | 0.33  | Q13838     | Spliceosome RNA helicase DDX39B (EC 3.6.4.13) (56 kDa U2AF65-associated protein) (ATP-dependent RNA helicase p47) (DEAD box protein UAP56) (HLA-B-associated transcript 1 protein)                                  | 428  | DDX39B       | 3 | 2 | 5 | 8.2  | 5.1  | 16.6 |
| 825 | -0.17 | 0.89  | 0.38  | E9PLD0     | Ras-related protein Rab-1B                                                                                                                                                                                          | 169  | RAB1B        | 3 | 5 | 5 | 20.7 | 30.8 | 37.9 |
| 826 | -0.17 | 0.00  | -0.06 | C9JIJ1     | RAC-beta serine/threonine-protein kinase (Fragment)                                                                                                                                                                 | 119  | AKT2         | 1 | 0 | 1 | 8.4  | 0    | 8.4  |
| 827 | -0.17 | 2.06  | 0.37  | O95573     | Long-chain-fatty-acid--CoA ligase 3 (EC 6.2.1.3) (Long-chain acyl-CoA synthetase 3) (LACS 3)                                                                                                                        | 720  | ACSL3        | 2 | 2 | 2 | 3.5  | 4.6  | 3.5  |
| 828 | -0.17 | 0.01  | 0.07  | A0A0A6YYA0 | Protein TMED7-TICAM2                                                                                                                                                                                                | 188  | TMED7-TICAM2 | 1 | 1 | 2 | 10.1 | 6.4  | 16.5 |
| 829 | -0.16 | -0.63 | -1.88 | B1AJY5     | 26S proteasome non-ATPase regulatory subunit 10                                                                                                                                                                     | 185  | PSMD10       | 2 | 1 | 3 | 10.8 | 4.3  | 21.1 |
| 830 | -0.16 | 0.26  | 0.86  | Q01081     | Splicing factor U2AF 35 kDa subunit (U2 auxiliary factor 35 kDa subunit) (U2 small nuclear RNA auxiliary factor 1) (U2 snRNP auxiliary factor small subunit)                                                        | 240  | U2AF1        | 2 | 2 | 2 | 5.8  | 10.4 | 5.8  |
| 831 | -0.16 | 0.42  | 0.23  | Q9Y6M7     | Sodium bicarbonate cotransporter 3 (Electroneutral Na/HCO(3) cotransporter) (Sodium bicarbonate cotransporter 2) (Sodium bicarbonate cotransporter 2b) (Bicarbonate transporter) (Solute carrier family 4 member 7) | 1214 | SLC4A7       | 3 | 2 | 1 | 4.8  | 3.5  | 2.1  |

|     |       |       |       |        |                                                                                                                                                                                                                                                                |      |        |   |    |    |      |      |      |
|-----|-------|-------|-------|--------|----------------------------------------------------------------------------------------------------------------------------------------------------------------------------------------------------------------------------------------------------------------|------|--------|---|----|----|------|------|------|
| 832 | -0.16 | 0.74  | 0.66  | P16615 | Sarcoplasmic/endoplasmic reticulum calcium ATPase 2 (SERCA2) (SR Ca(2+)-ATPase 2) (EC 3.6.3.8) (Calcium pump 2) (Calcium-transporting ATPase sarcoplasmic reticulum type, slow twitch skeletal muscle isoform) (Endoplasmic reticulum class 1/2 Ca(2+) ATPase) | 1042 | ATP2A2 | 8 | 10 | 12 | 10.9 | 13.2 | 17.7 |
| 833 | -0.16 | -0.29 | -0.46 | P61956 | Small ubiquitin-related modifier 2 (SUMO-2) (HSMT3) (SMT3 homolog 2) (SUMO-3) (Sentrin-2) (Ubiquitin-like protein SMT3B) (Smt3B)                                                                                                                               | 95   | SUMO2  | 1 | 2  | 2  | 16.9 | 31   | 31   |
| 834 | -0.15 | -0.04 | 0.43  | Q9UBT2 | SUMO-activating enzyme subunit 2 (EC 6.3.2.-) (Anthracycline-associated resistance ARX) (Ubiquitin-like 1-activating enzyme E1B) (Ubiquitin-like modifier-activating enzyme 2)                                                                                 | 640  | UBA2   | 3 | 1  | 1  | 7    | 2.3  | 2.3  |
| 835 | -0.15 | 0.31  | 0.61  | Q15181 | Inorganic pyrophosphatase (EC 3.6.1.1) (Pyrophosphate phosphohydrolase) (PPase)                                                                                                                                                                                | 289  | PPA1   | 1 | 1  | 3  | 3.5  | 3.1  | 11.8 |
| 836 | -0.15 | 2.08  | 0.44  | H0YDT8 | ER membrane protein complex subunit 7 (Fragment)                                                                                                                                                                                                               | 192  | EMC7   | 1 | 1  | 2  | 6.8  | 8.3  | 10.9 |
| 837 | -0.15 | 0.00  | 0.00  | F8WCQ2 | Phosphatidylinositide phosphatase SAC1                                                                                                                                                                                                                         | 71   | SACM1L | 1 | 0  | 0  | 12.7 | 0    | 0    |
| 838 | -0.15 | -0.41 | 0.29  | Q86Y56 | Dynein assembly factor 5, axonemal (HEAT repeat-containing protein 2)                                                                                                                                                                                          | 855  | DNAAF5 | 1 | 1  | 1  | 4.7  | 4.7  | 4.7  |
| 839 | -0.15 | 0.46  | 0.01  | P30049 | ATP synthase subunit delta, mitochondrial (F-ATPase delta subunit)                                                                                                                                                                                             | 168  | ATP5D  | 1 | 1  | 1  | 5.4  | 5.4  | 5.4  |
| 840 | -0.15 | 0.00  | 0.00  | Q9UBK9 | Protein UXT (Androgen receptor trapped clone 27 protein) (ART-27) (Ubiquitously expressed transcript protein)                                                                                                                                                  | 157  | UXT    | 1 | 0  | 0  | 8.3  | 0    | 0    |

|     |       |       |       |        |                                                                                                                                                                                           |      |         |    |    |    |      |      |      |
|-----|-------|-------|-------|--------|-------------------------------------------------------------------------------------------------------------------------------------------------------------------------------------------|------|---------|----|----|----|------|------|------|
| 841 | -0.15 | 2.44  | 0.00  | Q96HC4 | PDZ and LIM domain protein 5 (Enigma homolog) (Enigma-like PDZ and LIM domains protein)                                                                                                   | 596  | PDLIM5  | 1  | 1  | 0  | 1.9  | 2.9  | 0    |
| 842 | -0.15 | 0.00  | -0.08 | Q92621 | Nuclear pore complex protein Nup205 (205 kDa nucleoporin) (Nucleoporin Nup205)                                                                                                            | 2012 | NUP205  | 1  | 0  | 2  | 0.6  | 0    | 1.2  |
| 843 | -0.14 | 0.00  | 0.33  | Q16878 | Cysteine dioxygenase type 1 (EC 1.13.11.20) (Cysteine dioxygenase type I) (CDO) (CDO-I)                                                                                                   | 200  | CDO1    | 1  | 0  | 1  | 4    | 0    | 4    |
| 844 | -0.14 | 0.00  | 2.49  | O94826 | Mitochondrial import receptor subunit TOM70 (Mitochondrial precursor proteins import receptor) (Translocase of outer membrane 70 kDa subunit)                                             | 608  | TOMM70A | 1  | 0  | 2  | 1.5  | 0    | 7.6  |
| 845 | -0.14 | -0.14 | 0.13  | P61981 | 14-3-3 protein gamma (Protein kinase C inhibitor protein 1) (KCIP-1) [Cleaved into: 14-3-3 protein gamma, N-terminally processed]                                                         | 247  | YWHAG   | 6  | 8  | 7  | 33.2 | 47   | 37.2 |
| 846 | -0.14 | 0.27  | 0.61  | O43707 | Alpha-actinin-4 (Non-muscle alpha-actinin 4)                                                                                                                                              | 911  | ACTN4   | 18 | 28 | 22 | 24.3 | 38.5 | 30.7 |
| 847 | -0.14 | -0.10 | 0.19  | P62333 | 26S protease regulatory subunit 10B (26S proteasome AAA-ATPase subunit RPT4) (Proteasome 26S subunit ATPase 6) (Proteasome subunit p42)                                                   | 389  | PSMC6   | 4  | 3  | 5  | 11.8 | 9.5  | 14.9 |
| 848 | -0.14 | 1.04  | -0.24 | P00167 | Cytochrome b5 (Microsomal cytochrome b5 type A) (MCB5)                                                                                                                                    | 134  | CYB5A   | 1  | 3  | 1  | 9.2  | 36.7 | 9.2  |
| 849 | -0.14 | 1.07  | 0.64  | Q8N5K1 | CDGSH iron-sulfur domain-containing protein 2 (Endoplasmic reticulum intermembrane small protein) (MitoNEET-related 1 protein) (Miner1) (Nutrient-deprivation autophagy factor-1) (NAF-1) | 135  | CISD2   | 3  | 7  | 3  | 21.5 | 47.4 | 21.5 |
| 850 | -0.14 | 0.37  | 0.31  | E9PF10 | Nuclear pore complex protein Nup155                                                                                                                                                       | 1327 | NUP155  | 1  | 1  | 1  | 0.8  | 0.8  | 0.8  |



|     |       |       |       |        |                                                                                                                                                                                                                                                                                                                                                         |      |         |   |   |   |      |      |      |
|-----|-------|-------|-------|--------|---------------------------------------------------------------------------------------------------------------------------------------------------------------------------------------------------------------------------------------------------------------------------------------------------------------------------------------------------------|------|---------|---|---|---|------|------|------|
| 851 | -0.14 | -0.59 | 0.61  | Q08752 | Peptidyl-prolyl cis-trans isomerase D (PPIase D) (EC 5.2.1.8) (40 kDa peptidyl-prolyl cis-trans isomerase) (Cyclophilin-40) (CYP-40) (Cyclophilin-related protein) (Rotamase D)                                                                                                                                                                         | 370  | PPID    | 2 | 1 | 1 | 4.6  | 2.4  | 2.2  |
| 852 | -0.14 | 0.00  | 0.26  | H0Y4Q3 | Ran GTPase-activating protein 1 (Fragment)                                                                                                                                                                                                                                                                                                              | 253  | RANGAP1 | 2 | 0 | 2 | 11.1 | 0    | 11.1 |
| 853 | -0.14 | -0.05 | -0.12 | A8MU58 | Aminoacyl tRNA synthase complex-interacting multifunctional protein 2                                                                                                                                                                                                                                                                                   | 242  | AIMP2   | 2 | 1 | 2 | 8.7  | 3.7  | 8.7  |
| 854 | -0.13 | 1.31  | -0.18 | P47985 | Cytochrome b-c1 complex subunit Rieske, mitochondrial (EC 1.10.2.2) (Complex III subunit 5) (Cytochrome b-c1 complex subunit 5) (Rieske iron-sulfur protein) (RISP) (Ubiquinol-cytochrome c reductase iron-sulfur subunit) [Cleaved into: Cytochrome b-c1 complex subunit 11 (Complex III subunit IX) (Ubiquinol-cytochrome c reductase 8 kDa protein)] | 274  | UQCRFS1 | 2 | 3 | 1 | 10.9 | 15.3 | 7.7  |
| 855 | -0.13 | 1.40  | 0.23  | Q9P0I2 | ER membrane protein complex subunit 3 (Transmembrane protein 111)                                                                                                                                                                                                                                                                                       | 261  | EMC3    | 1 | 1 | 1 | 3.4  | 5    | 3.4  |
| 856 | -0.13 | 0.11  | 0.42  | P53621 | Coatomer subunit alpha (Alpha-coat protein) (Alpha-COP) (HEP-COP) (HEPCOP) [Cleaved into: Xenin (Xenopsin-related peptide); Proxenin]                                                                                                                                                                                                                   | 1224 | COPA    | 4 | 3 | 4 | 4.3  | 3.2  | 4    |
| 857 | -0.13 | 0.00  | 0.07  | B4E1C5 | Histidine--tRNA ligase, cytoplasmic (cDNA FLJ58562, highly similar to Histidyl-tRNA synthetase (EC 6.1.1.21))                                                                                                                                                                                                                                           | 395  | HARS    | 1 | 0 | 2 | 3.3  | 0    | 6.3  |
| 858 | -0.13 | 0.00  | -0.09 | P63096 | Guanine nucleotide-binding protein G(i) subunit alpha-1 (Adenylate cyclase-inhibiting G alpha protein)                                                                                                                                                                                                                                                  | 354  | GNAI1   | 2 | 1 | 2 | 6.8  | 3.1  | 6.8  |

|     |       |       |       |        |                                                                                                                                                                          |      |          |   |   |   |      |      |      |
|-----|-------|-------|-------|--------|--------------------------------------------------------------------------------------------------------------------------------------------------------------------------|------|----------|---|---|---|------|------|------|
| 859 | -0.13 | 0.04  | 0.53  | Q14914 | Prostaglandin reductase 1 (PRG-1) (EC 1.3.1.-) (15-oxoprostaglandin 13-reductase) (EC 1.3.1.48) (NADP-dependent leukotriene B4 12-hydroxydehydrogenase) (EC 1.3.1.74)    | 329  | PTGR1    | 5 | 5 | 5 | 22.2 | 26.1 | 21.3 |
| 860 | -0.13 | 0.00  | 0.15  | Q5MIZ7 | Serine/threonine-protein phosphatase 4 regulatory subunit 3B (SMEK homolog 2)                                                                                            | 849  | SMEK2    | 1 | 0 | 1 | 1.6  | 0    | 1.6  |
| 861 | -0.12 | 0.46  | -0.44 | Q9NX63 | MICOS complex subunit MIC19 (Coiled-coil-helix-coiled-coil-helix domain-containing protein 3)                                                                            | 227  | CHCHD3   | 2 | 2 | 3 | 11.5 | 11.5 | 11.9 |
| 862 | -0.12 | 0.00  | 0.67  | H0YA83 | Beta-hexosaminidase subunit beta (Fragment)                                                                                                                              | 170  | HEXB     | 1 | 0 | 1 | 5.9  | 0    | 5.9  |
| 863 | -0.12 | 1.26  | 0.70  | Q9NYU2 | UDP-glucose:glycoprotein glucosyltransferase 1 (UGT1) (hUGT1) (EC 2.4.1.-) (UDP--Glc:glycoprotein glucosyltransferase) (UDP-glucose ceramide glucosyltransferase-like 1) | 1555 | UGGT1    | 1 | 3 | 3 | 0.8  | 3.4  | 2.9  |
| 864 | -0.12 | 0.36  | 0.93  | Q9UKD2 | mRNA turnover protein 4 homolog (Ribosome assembly factor MRTO4)                                                                                                         | 239  | MRTO4    | 1 | 1 | 1 | 5.4  | 5.4  | 5.4  |
| 865 | -0.12 | 0.27  | 0.11  | P61019 | Ras-related protein Rab-2A                                                                                                                                               | 212  | RAB2A    | 4 | 5 | 5 | 20.8 | 25.5 | 28.3 |
| 866 | -0.12 | 0.00  | -0.01 | Q8N0U8 | Vitamin K epoxide reductase complex subunit 1-like protein 1 (VKORC1-like protein 1) (EC 1.17.4.4)                                                                       | 176  | VKORC1L1 | 1 | 0 | 1 | 6.2  | 0    | 6.2  |
| 867 | -0.12 | -0.49 | 0.38  | O00232 | 26S proteasome non-ATPase regulatory subunit 12 (26S proteasome regulatory subunit RPN5) (26S proteasome regulatory subunit p55)                                         | 456  | PSMD12   | 2 | 1 | 2 | 5    | 2.2  | 5    |
| 868 | -0.12 | 0.35  | 0.22  | P51149 | Ras-related protein Rab-7a                                                                                                                                               | 207  | RAB7A    | 5 | 8 | 6 | 29   | 47.8 | 34.8 |

|     |       |       |       |        |                                                                                                                                                        |     |          |    |    |    |      |      |      |
|-----|-------|-------|-------|--------|--------------------------------------------------------------------------------------------------------------------------------------------------------|-----|----------|----|----|----|------|------|------|
| 869 | -0.12 | 0.59  | 1.31  | K7EJE8 | Lon protease homolog, mitochondrial (EC 3.4.21.-) (Lon protease-like protein) (Mitochondrial ATP-dependent protease Lon) (Serine protease 15)          | 829 | LONP1    | 1  | 3  | 3  | 1.3  | 4.2  | 4.5  |
| 870 | -0.11 | 0.94  | 0.44  | P02786 | Transferrin receptor protein 1 (TR) (TfR) (TfR1) (Trfr) (T9) (p90) (CD antigen CD71) [Cleaved into: Transferrin receptor protein 1, serum form (sTfR)] | 760 | TFRC     | 5  | 5  | 9  | 7.6  | 8.4  | 14.5 |
| 871 | -0.11 | 0.00  | 0.22  | Q9H0A8 | COMM domain-containing protein 4                                                                                                                       | 199 | COMMD4   | 1  | 0  | 1  | 13.3 | 0    | 13.3 |
| 872 | -0.11 | -0.44 | -0.15 | P21291 | Cysteine and glycine-rich protein 1 (Cysteine-rich protein 1) (CRP) (CRP1) (Epididymis luminal protein 141) (HEL-141)                                  | 193 | CSRP1    | 6  | 8  | 7  | 50.3 | 55.4 | 59.1 |
| 873 | -0.11 | -0.52 | 0.40  | P04083 | Annexin A1 (Annexin I) (Annexin-1) (Calpactin II) (Calpactin-2) (Chromobindin-9) (Lipocortin I) (Phospholipase A2 inhibitory protein) (p35)            | 346 | ANXA1    | 11 | 17 | 12 | 32.7 | 55.5 | 30.3 |
| 874 | -0.11 | 0.00  | 0.00  | K7EP09 | Bifunctional coenzyme A synthase (Fragment)                                                                                                            | 90  | COASY    | 1  | 0  | 0  | 11.1 | 0    | 0    |
| 875 | -0.11 | 0.49  | 0.77  | C9JQ41 | Coiled-coil domain-containing protein 58                                                                                                               | 130 | CCDC58   | 1  | 1  | 2  | 6.9  | 8.5  | 20   |
| 876 | -0.11 | 0.62  | 0.32  | I3L1P8 | Mitochondrial 2-oxoglutarate/malate carrier protein (Fragment)                                                                                         | 296 | SLC25A11 | 3  | 1  | 1  | 14.5 | 3.7  | 5.4  |
| 877 | -0.11 | 1.23  | 0.23  | F8VVM2 | Phosphate carrier protein, mitochondrial                                                                                                               | 324 | SLC25A3  | 2  | 4  | 2  | 5.9  | 17.9 | 5.9  |
| 878 | -0.11 | 0.07  | 0.09  | M0QZS6 | SUMO-activating enzyme subunit 1                                                                                                                       | 265 | SAE1     | 3  | 1  | 2  | 12.1 | 4.9  | 7.9  |
| 879 | -0.11 | 0.75  | 1.02  | P49720 | Proteasome subunit beta type-3 (EC 3.4.25.1) (Proteasome chain 13) (Proteasome component C10-II) (Proteasome theta chain)                              | 205 | PSMB3    | 5  | 4  | 6  | 25.4 | 25.4 | 33.2 |

|     |       |       |       |        |                                                                                                                                                                                                                                                                                                                                                                                                    |     |        |   |   |   |      |      |      |
|-----|-------|-------|-------|--------|----------------------------------------------------------------------------------------------------------------------------------------------------------------------------------------------------------------------------------------------------------------------------------------------------------------------------------------------------------------------------------------------------|-----|--------|---|---|---|------|------|------|
| 880 | -0.11 | 0.00  | 0.09  | Q9Y262 | Eukaryotic translation initiation factor 3 subunit L (eIF3L) (Eukaryotic translation initiation factor 3 subunit 6-interacting protein) (Eukaryotic translation initiation factor 3 subunit E-interacting protein)                                                                                                                                                                                 | 564 | EIF3L  | 1 | 0 | 1 | 1.6  | 0    | 1.6  |
| 881 | -0.10 | 0.61  | -0.23 | P04632 | Calpain small subunit 1 (CSS1) (Calcium-activated neutral proteinase small subunit) (CANP small subunit) (Calcium-dependent protease small subunit) (CDPS) (Calcium-dependent protease small subunit 1) (Calpain regulatory subunit)                                                                                                                                                               | 268 | CAPNS1 | 3 | 3 | 2 | 10.8 | 14.9 | 6    |
| 882 | -0.10 | -0.06 | 0.28  | J3KTJ1 | Myosin regulatory light chain 12A (Fragment)                                                                                                                                                                                                                                                                                                                                                       | 114 | MYL12A | 1 | 1 | 1 | 15.8 | 15.8 | 15.8 |
| 883 | -0.10 | -0.33 | 0.10  | P56192 | Methionine--tRNA ligase, cytoplasmic (EC 6.1.1.10) (Methionyl-tRNA synthetase) (MetRS)                                                                                                                                                                                                                                                                                                             | 900 | MARS   | 3 | 1 | 2 | 4.1  | 1.2  | 2.6  |
| 884 | -0.10 | 1.04  | 0.28  | P00505 | Aspartate aminotransferase, mitochondrial (mAspAT) (EC 2.6.1.1) (EC 2.6.1.7) (Fatty acid-binding protein) (FABP-1) (Glutamate oxaloacetate transaminase 2) (Kynurenine aminotransferase 4) (Kynurenine aminotransferase IV) (Kynurenine--oxoglutarate transaminase 4) (Kynurenine--oxoglutarate transaminase IV) (Plasma membrane-associated fatty acid-binding protein) (FABPpm) (Transaminase A) | 430 | GOT2   | 4 | 7 | 8 | 13   | 16.5 | 21.4 |

|     |       |      |       |        |                                                                                                                                                                                                                                                                                    |     |         |    |    |    |      |      |      |
|-----|-------|------|-------|--------|------------------------------------------------------------------------------------------------------------------------------------------------------------------------------------------------------------------------------------------------------------------------------------|-----|---------|----|----|----|------|------|------|
| 885 | -0.10 | 0.67 | 0.35  | P30040 | Endoplasmic reticulum resident protein 29 (ERp29) (Endoplasmic reticulum resident protein 28) (ERp28) (Endoplasmic reticulum resident protein 31) (ERp31)                                                                                                                          | 261 | ERP29   | 2  | 5  | 3  | 7.7  | 25.3 | 21.8 |
| 886 | -0.09 | 0.07 | 0.22  | P46108 | Adapter molecule crk (Proto-oncogene c-Crk) (p38)                                                                                                                                                                                                                                  | 304 | CRK     | 2  | 1  | 2  | 9.5  | 5.6  | 9.5  |
| 887 | -0.09 | 0.82 | 0.76  | P14625 | Endoplasmic reticulum chaperone protein 94 kDa (GRP-94) (Heat shock protein 90 kDa beta member 1) (Tumor rejection antigen 1) (gp96 homolog)                                                                                                                                       | 803 | HSP90B1 | 14 | 14 | 18 | 16.9 | 20.7 | 23.8 |
| 888 | -0.09 | 0.54 | 0.53  | P30044 | Peroxisomal oxidoreductase (EC 1.11.1.15) (Alu corepressor 1) (Antioxidant enzyme B166) (AOEB166) (Liver tissue 2D-page spot 71B) (PLP) (Peroxisomal oxidoreductase) (Prx-V) (Peroxisomal antioxidant enzyme) (TPx type VI) (Thioredoxin peroxidase PMP20) (Thioredoxin reductase) | 214 | PRDX5   | 5  | 7  | 6  | 37   | 62.3 | 48.8 |
| 889 | -0.09 | 0.86 | 0.64  | H7C0V0 | Uncharacterized protein C2orf47, mitochondrial (Fragment)                                                                                                                                                                                                                          | 225 | C2orf47 | 1  | 1  | 1  | 4.4  | 4.4  | 4.4  |
| 890 | -0.09 | 0.00 | 0.00  | H0YLV7 | SAFB-like transcription modulator                                                                                                                                                                                                                                                  | 62  | SLTM    | 1  | 0  | 0  | 30.6 | 0    | 0    |
| 891 | -0.09 | 0.14 | 0.09  | Q9H488 | GDP-fucose protein O-fucosyltransferase 1 (EC 2.4.1.221) (Peptide-O-fucosyltransferase 1) (O-FucT-1)                                                                                                                                                                               | 388 | POFUT1  | 1  | 1  | 1  | 5.2  | 5.2  | 5.2  |
| 892 | -0.09 | 0.65 | -0.40 | O43674 | NADH dehydrogenase [ubiquinone] 1 beta subcomplex subunit 5, mitochondrial (Complex I-SGDH) (CI-SGDH) (NADH-ubiquinone oxidoreductase SGD subunit)                                                                                                                                 | 189 | NDUFB5  | 1  | 1  | 1  | 5.8  | 4.2  | 5.8  |
| 893 | -0.09 | 0.30 | 0.63  | A6PVX3 | 26S proteasome non-ATPase regulatory subunit 4 (Fragment)                                                                                                                                                                                                                          | 203 | PSMD4   | 1  | 1  | 3  | 7.4  | 7.4  | 19.7 |

|     |       |       |       |            |                                                                                                                                                                            |      |         |    |    |    |      |      |      |
|-----|-------|-------|-------|------------|----------------------------------------------------------------------------------------------------------------------------------------------------------------------------|------|---------|----|----|----|------|------|------|
| 894 | -0.09 | 0.41  | 0.18  | P07237     | Protein disulfide-isomerase (PDI) (EC 5.3.4.1) (Cellular thyroid hormone-binding protein) (Prolyl 4-hydroxylase subunit beta) (p55)                                        | 508  | P4HB    | 15 | 13 | 17 | 26   | 33.1 | 30.9 |
| 895 | -0.08 | 0.00  | 0.09  | H3BP42     | Apoptosis-associated speck-like protein-containing a CARD (Fragment)                                                                                                       | 125  | PYCARD  | 1  | 0  | 1  | 13.6 | 0    | 13.6 |
| 896 | -0.08 | 0.00  | 0.21  | O15143     | Actin-related protein 2/3 complex subunit 1B (Arp2/3 complex 41 kDa subunit) (p41-ARC)                                                                                     | 372  | ARPC1B  | 2  | 0  | 2  | 8.3  | 0    | 8.3  |
| 897 | -0.08 | 0.00  | 0.22  | Q9UHN6     | Transmembrane protein 2                                                                                                                                                    | 1383 | TMEM2   | 1  | 0  | 1  | 0.9  | 0    | 0.9  |
| 898 | -0.08 | 0.00  | 0.22  | A0A087WXS7 | ATPase ASNA1 (EC 3.6.-.-) (Arsenical pump-driving ATPase) (Arsenite-stimulated ATPase)                                                                                     | 331  | ASNA1   | 1  | 0  | 1  | 4.8  | 0    | 4.8  |
| 899 | -0.08 | -0.49 | 0.13  | Q9UNM6     | 26S proteasome non-ATPase regulatory subunit 13 (26S proteasome regulatory subunit RPN9) (26S proteasome regulatory subunit S11) (26S proteasome regulatory subunit p40.5) | 376  | PSMD13  | 3  | 1  | 5  | 9    | 2.4  | 15.7 |
| 900 | -0.08 | -0.17 | -0.06 | Q9UBQ0     | Vacuolar protein sorting-associated protein 29 (hVPS29) (PEP11 homolog) (Vesicle protein sorting 29)                                                                       | 182  | VPS29   | 1  | 3  | 1  | 7.1  | 19.2 | 7.1  |
| 901 | -0.08 | -0.16 | -0.26 | R4GMT0     | Alpha-centractin                                                                                                                                                           | 332  | ACTR1A  | 1  | 2  | 1  | 4.8  | 7.2  | 4.8  |
| 902 | -0.08 | 0.00  | 0.15  | O75083     | WD repeat-containing protein 1 (Actin-interacting protein 1) (AIP1) (NORI-1)                                                                                               | 606  | WDR1    | 1  | 0  | 2  | 2.3  | 0    | 5    |
| 903 | -0.08 | 0.00  | 0.00  | M0R0Q7     | DNA ligase (EC 6.5.1.1)                                                                                                                                                    | 800  | LIG1    | 1  | 0  | 1  | 1.8  | 0    | 1.5  |
| 904 | -0.08 | 0.00  | 0.25  | Q96FX7     | tRNA (adenine(58)-N(1))-methyltransferase catalytic subunit TRMT61A (EC 2.1.1.220) (tRNA(m1A58)-methyltransferase subunit TRMT61A) (tRNA(m1A58)MTase subunit TRMT61A)      | 289  | TRMT61A | 1  | 0  | 1  | 3.5  | 0    | 3.5  |

|     |       |       |       |        |                                                                                                                                                                                                                                            |     |        |   |   |   |      |      |      |
|-----|-------|-------|-------|--------|--------------------------------------------------------------------------------------------------------------------------------------------------------------------------------------------------------------------------------------------|-----|--------|---|---|---|------|------|------|
| 905 | -0.08 | -0.25 | -0.11 | Q9P000 | COMM domain-containing protein 9                                                                                                                                                                                                           | 198 | COMMD9 | 1 | 1 | 1 | 10.3 | 10.3 | 10.3 |
| 906 | -0.08 | 0.00  | 0.00  | E9PNC7 | Dr1-associated corepressor (Fragment)                                                                                                                                                                                                      | 155 | DRAP1  | 1 | 0 | 0 | 7.1  | 0    | 0    |
| 907 | -0.07 | -0.07 | 0.37  | Q9NR31 | GTP-binding protein SAR1a (COPII-associated small GTPase)                                                                                                                                                                                  | 198 | SAR1A  | 2 | 4 | 5 | 9.6  | 25.8 | 32.8 |
| 908 | -0.07 | 0.00  | 0.18  | M0R208 | ATP-dependent Clp protease proteolytic subunit (EC 3.4.21.92)                                                                                                                                                                              | 190 | CLPP   | 1 | 0 | 1 | 7.9  | 0    | 7.9  |
| 909 | -0.07 | -0.01 | 0.50  | Q00688 | Peptidyl-prolyl cis-trans isomerase FKBP3 (PPIase FKBP3) (EC 5.2.1.8) (25 kDa FK506-binding protein) (25 kDa FKBP) (FKBP-25) (FK506-binding protein 3) (FKBP-3) (Immunophilin FKBP25) (Rapamycin-selective 25 kDa immunophilin) (Rotamase) | 224 | FKBP3  | 2 | 6 | 3 | 14.7 | 28.1 | 18.3 |
| 910 | -0.07 | 0.00  | 0.00  | Q96P11 | Probable 28S rRNA (cytosine-C(5))-methyltransferase (EC 2.1.1.-) (NOL1-related protein) (NOL1R) (NOL1/NOP2/Sun domain family member 5) (Williams-Beuren syndrome chromosomal region 20A protein)                                           | 429 | NSUN5  | 1 | 0 | 0 | 2.3  | 0    | 0    |
| 911 | -0.07 | -0.08 | 0.18  | P84077 | ADP-ribosylation factor 1                                                                                                                                                                                                                  | 181 | ARF1   | 3 | 4 | 3 | 19.9 | 33.1 | 19.9 |
| 912 | -0.07 | -0.32 | -0.09 | P61020 | Ras-related protein Rab-5B                                                                                                                                                                                                                 | 215 | RAB5B  | 3 | 2 | 2 | 20.1 | 13.2 | 14.4 |
| 913 | -0.07 | 0.51  | 0.08  | Q07812 | Apoptosis regulator BAX (Bcl-2-like protein 4) (Bcl2-L-4)                                                                                                                                                                                  | 192 | BAX    | 1 | 1 | 1 | 6.1  | 7.3  | 6.1  |
| 914 | -0.06 | 0.26  | 0.31  | Q04917 | 14-3-3 protein eta (Protein AS1)                                                                                                                                                                                                           | 246 | YWHAH  | 3 | 5 | 3 | 12.2 | 26.8 | 13.4 |

|     |       |       |       |            |                                                                                                                                                                                                                                                  |     |        |   |   |   |      |      |      |
|-----|-------|-------|-------|------------|--------------------------------------------------------------------------------------------------------------------------------------------------------------------------------------------------------------------------------------------------|-----|--------|---|---|---|------|------|------|
| 915 | -0.06 | 0.00  | 0.46  | O96007     | Molybdopterin synthase catalytic subunit (EC 2.8.1.12) (MOCO1-B) (Molybdenum cofactor synthesis protein 2 large subunit) (Molybdenum cofactor synthesis protein 2B) (MOCS2B) (Molybdopterin-synthase large subunit) (MPT synthase large subunit) | 188 | MOCS2  | 1 | 0 | 1 | 8    | 0    | 8    |
| 916 | -0.06 | 0.00  | 0.97  | P82673     | 28S ribosomal protein S35, mitochondrial (MRP-S35) (S35mt) (28S ribosomal protein S28, mitochondrial) (MRP-S28) (S28mt)                                                                                                                          | 323 | MRPS35 | 1 | 0 | 1 | 3.1  | 0    | 3.1  |
| 917 | -0.06 | -0.27 | 0.61  | Q9Y678     | Coatomer subunit gamma-1 (Gamma-1-coat protein) (Gamma-1-COP)                                                                                                                                                                                    | 874 | COPG1  | 4 | 2 | 4 | 6.8  | 3.3  | 6.8  |
| 918 | -0.06 | 0.24  | -0.20 | Q9H4M9     | EH domain-containing protein 1 (PAST homolog 1) (hPAST1) (Testilin)                                                                                                                                                                              | 534 | EHD1   | 1 | 1 | 2 | 1.7  | 2.2  | 6    |
| 919 | -0.06 | -0.38 | 0.00  | G5E9R3     | 60S ribosomal protein L37a (Ribosomal protein L37a, isoform CRA_b)                                                                                                                                                                               | 58  | RPL37A | 1 | 2 | 0 | 15.5 | 29.3 | 0    |
| 920 | -0.05 | -0.01 | 0.28  | Q9NYP7     | Elongation of very long chain fatty acids protein 5 (EC 2.3.1.199) (3-keto acyl-CoA synthase ELOVL5) (ELOVL fatty acid elongase 5) (ELOVL FA elongase 5) (Fatty acid elongase 1) (hELO1) (Very-long-chain 3-oxoacyl-CoA synthase 5)              | 299 | ELOVL5 | 1 | 1 | 1 | 14.8 | 14.8 | 14.8 |
| 921 | -0.05 | 0.00  | 0.30  | A0A0A0MSP6 | Serrate RNA effector molecule homolog (Fragment)                                                                                                                                                                                                 | 148 | SRRT   | 1 | 0 | 1 | 8.8  | 0    | 8.8  |
| 922 | -0.05 | 0.00  | 0.10  | P25398     | 40S ribosomal protein S12                                                                                                                                                                                                                        | 132 | RPS12  | 6 | 7 | 4 | 63.6 | 50   | 42.4 |
| 923 | -0.05 | -0.34 | -0.16 | E9PQH6     | Rho-related GTP-binding protein RhoC (Fragment)                                                                                                                                                                                                  | 169 | RHOC   | 3 | 5 | 5 | 18.9 | 27.8 | 27.8 |
| 924 | -0.05 | 0.07  | 0.13  | P46783     | 40S ribosomal protein S10                                                                                                                                                                                                                        | 165 | RPS10  | 4 | 4 | 2 | 24.2 | 24.2 | 9.7  |



|     |       |       |       |        |                                                                                                                                                                                                                                                                                             |      |        |   |   |   |      |      |      |
|-----|-------|-------|-------|--------|---------------------------------------------------------------------------------------------------------------------------------------------------------------------------------------------------------------------------------------------------------------------------------------------|------|--------|---|---|---|------|------|------|
| 925 | -0.05 | 0.05  | 0.53  | P42126 | Enoyl-CoA delta isomerase 1, mitochondrial (EC 5.3.3.8) (3,2-trans-enoyl-CoA isomerase) (Delta(3),Delta(2)-enoyl-CoA isomerase) (D3,D2-enoyl-CoA isomerase) (Dodecenoyl-CoA isomerase)                                                                                                      | 302  | ECI1   | 2 | 2 | 2 | 9.3  | 10.6 | 9.3  |
| 926 | -0.05 | 0.39  | -0.06 | P35606 | Coatomer subunit beta' (Beta'-coat protein) (Beta'-COP) (p102)                                                                                                                                                                                                                              | 906  | COPB2  | 2 | 5 | 2 | 2.7  | 7.2  | 2.7  |
| 927 | -0.05 | 0.93  | 0.15  | P27797 | Calreticulin (CRP55) (Calregulin) (Endoplasmic reticulum resident protein 60) (ERp60) (HACBP) (grp60)                                                                                                                                                                                       | 417  | CALR   | 7 | 5 | 7 | 15.1 | 21.3 | 14.4 |
| 928 | -0.04 | 0.00  | 0.19  | A0FGR8 | Extended synaptotagmin-2 (E-Syt2) (Chr2Syt)                                                                                                                                                                                                                                                 | 921  | ESYT2  | 1 | 0 | 1 | 3.7  | 0    | 3.7  |
| 929 | -0.04 | -0.09 | 0.24  | H0YJS4 | Eukaryotic translation initiation factor 2 subunit 1 (Fragment)                                                                                                                                                                                                                             | 252  | EIF2S1 | 1 | 1 | 1 | 6    | 6    | 6    |
| 930 | -0.04 | -0.13 | 0.30  | Q09161 | Nuclear cap-binding protein subunit 1 (80 kDa nuclear cap-binding protein) (CBP80) (NCBP 80 kDa subunit)                                                                                                                                                                                    | 790  | NCBP1  | 1 | 1 | 1 | 1.4  | 1.4  | 1.4  |
| 931 | -0.04 | 1.80  | 0.98  | P36957 | Dihydrolipoyllysine-residue succinyltransferase component of 2-oxoglutarate dehydrogenase complex, mitochondrial (EC 2.3.1.61) (2-oxoglutarate dehydrogenase complex component E2) (OGDC-E2) (Dihydrolipoamide succinyltransferase component of 2-oxoglutarate dehydrogenase complex) (E2K) | 453  | DLST   | 1 | 2 | 3 | 2    | 6    | 7.9  |
| 932 | -0.03 | -0.49 | 0.12  | Q9BTW9 | Tubulin-specific chaperone D (Beta-tubulin cofactor D) (tfcD) (SSD-1) (Tubulin-folding cofactor D)                                                                                                                                                                                          | 1192 | TBCD   | 2 | 2 | 1 | 2.6  | 2.6  | 1.3  |
| 933 | -0.03 | 0.08  | 0.11  | M0R0Y2 | Alpha-soluble NSF attachment protein                                                                                                                                                                                                                                                        | 256  | NAPA   | 3 | 3 | 5 | 19.9 | 15.6 | 32.4 |

|     |       |       |      |        |                                                                                                                                                                                                                                                                                                     |      |        |    |    |    |     |      |      |
|-----|-------|-------|------|--------|-----------------------------------------------------------------------------------------------------------------------------------------------------------------------------------------------------------------------------------------------------------------------------------------------------|------|--------|----|----|----|-----|------|------|
| 934 | -0.03 | 0.12  | 0.29 | P50213 | Isocitrate dehydrogenase [NAD] subunit alpha, mitochondrial (EC 1.1.1.41) (Isocitric dehydrogenase subunit alpha) (NAD(+)-specific ICDH subunit alpha)                                                                                                                                              | 366  | IDH3A  | 1  | 4  | 1  | 2.7 | 13.9 | 6.3  |
| 935 | -0.03 | 0.00  | 0.86 | Q9UIQ6 | Leucyl-cystinyl aminopeptidase (Cystinyl aminopeptidase) (EC 3.4.11.3) (Insulin-regulated membrane aminopeptidase) (Insulin-responsive aminopeptidase) (IRAP) (Oxytocinase) (OTase) (Placental leucine aminopeptidase) (P-LAP) [Cleaved into: Leucyl-cystinyl aminopeptidase, pregnancy serum form] | 1025 | LNPEP  | 1  | 0  | 1  | 1.5 | 0    | 1.5  |
| 936 | -0.03 | 0.00  | 0.00 | E9PLB0 | RNA-binding protein 4B                                                                                                                                                                                                                                                                              | 143  | RBM4B  | 1  | 0  | 0  | 8.4 | 0    | 0    |
| 937 | -0.03 | 0.00  | 0.00 | Q9H173 | Nucleotide exchange factor SIL1 (BiP-associated protein) (BAP)                                                                                                                                                                                                                                      | 461  | SIL1   | 1  | 0  | 0  | 2.6 | 0    | 0    |
| 938 | -0.03 | 0.00  | 1.02 | Q9UBB4 | Ataxin-10 (Brain protein E46 homolog) (Spinocerebellar ataxia type 10 protein)                                                                                                                                                                                                                      | 475  | ATXN10 | 1  | 0  | 3  | 2.4 | 0    | 10.2 |
| 939 | -0.03 | 0.37  | 0.24 | C9JIS1 | Guanine nucleotide-binding protein G(I)/G(S)/G(T) subunit beta-2 (Fragment)                                                                                                                                                                                                                         | 232  | GNB2   | 1  | 1  | 1  | 4.3 | 4.7  | 4.3  |
| 940 | -0.03 | 0.00  | 0.36 | Q16401 | 26S proteasome non-ATPase regulatory subunit 5 (26S protease subunit S5 basic) (26S proteasome subunit S5B)                                                                                                                                                                                         | 504  | PSMD5  | 2  | 0  | 1  | 6.7 | 0    | 4.1  |
| 941 | -0.02 | 0.06  | 0.62 | P36542 | ATP synthase subunit gamma, mitochondrial (F-ATPase gamma subunit)                                                                                                                                                                                                                                  | 298  | ATP5C1 | 2  | 3  | 2  | 7.7 | 11.4 | 7.7  |
| 942 | -0.02 | 0.27  | 0.35 | Q86UP2 | Kinectin (CG-1 antigen) (Kinesin receptor)                                                                                                                                                                                                                                                          | 1357 | KTN1   | 10 | 15 | 11 | 9.8 | 14.2 | 10.2 |
| 943 | -0.02 | -0.71 | 0.16 | P36405 | ADP-ribosylation factor-like protein 3                                                                                                                                                                                                                                                              | 182  | ARL3   | 1  | 2  | 1  | 6   | 12.6 | 6    |
| 944 | -0.02 | 0.04  | 0.26 | K7ENK9 | Vesicle-associated membrane protein 2                                                                                                                                                                                                                                                               | 68   | VAMP2  | 1  | 1  | 1  | 25  | 25   | 25   |

|     |       |       |       |        |                                                                                                                                                                                                    |     |          |   |    |   |      |      |      |
|-----|-------|-------|-------|--------|----------------------------------------------------------------------------------------------------------------------------------------------------------------------------------------------------|-----|----------|---|----|---|------|------|------|
| 945 | -0.02 | 0.00  | 1.05  | P11177 | Pyruvate dehydrogenase E1 component subunit beta, mitochondrial (PDHE1-B) (EC 1.2.4.1)                                                                                                             | 359 | PDHB     | 1 | 0  | 2 | 4.7  | 0    | 7.9  |
| 946 | -0.02 | 0.37  | 0.33  | Q04837 | Single-stranded DNA-binding protein, mitochondrial (Mt-SSB) (MtSSB) (PWP1-interacting protein 17)                                                                                                  | 148 | SSBP1    | 3 | 3  | 4 | 28.4 | 27.7 | 33.8 |
| 947 | -0.02 | -0.29 | 0.07  | P15559 | NAD(P)H dehydrogenase [quinone] 1 (EC 1.6.5.2) (Azoreductase) (DT-diaphorase) (DTD) (Menadione reductase) (NAD(P)H:quinone oxidoreductase 1) (Phylloquinone reductase) (Quinone reductase 1) (QR1) | 274 | NQO1     | 8 | 10 | 7 | 25.8 | 32.1 | 22.5 |
| 948 | -0.01 | -0.36 | -0.07 | Q96EK6 | Glucosamine 6-phosphate N-acetyltransferase (EC 2.3.1.4) (Phosphoglucosamine acetylase) (Phosphoglucosamine transacetylase)                                                                        | 184 | GNPNAT1  | 2 | 2  | 2 | 15.8 | 13.6 | 15.8 |
| 949 | -0.01 | 1.37  | 1.36  | O00264 | Membrane-associated progesterone receptor component 1 (mPR)                                                                                                                                        | 195 | PGRMC1   | 2 | 4  | 2 | 9.2  | 22.6 | 12.3 |
| 950 | -0.01 | -0.08 | 0.11  | P51665 | 26S proteasome non-ATPase regulatory subunit 7 (26S proteasome regulatory subunit RPN8) (26S proteasome regulatory subunit S12) (Mov34 protein homolog) (Proteasome subunit p40)                   | 324 | PSMD7    | 2 | 2  | 2 | 6.5  | 5.9  | 6.5  |
| 951 | -0.01 | 0.00  | 0.16  | J9JIC5 | Protein Njmu-R1                                                                                                                                                                                    | 396 | C17orf75 | 1 | 0  | 1 | 2.8  | 0    | 2.8  |
| 952 | -0.01 | 0.00  | 0.15  | Q9P032 | NADH dehydrogenase [ubiquinone] 1 alpha subcomplex assembly factor 4 (Hormone-regulated proliferation-associated protein of 20 kDa)                                                                | 175 | NDUF4F4  | 1 | 0  | 1 | 8    | 0    | 8    |
| 953 | -0.01 | 0.48  | 0.51  | Q96E11 | Ribosome-recycling factor, mitochondrial (RRF) (Ribosome-releasing factor, mitochondrial)                                                                                                          | 262 | MRRF     | 1 | 1  | 3 | 5.7  | 4.3  | 17.1 |

|     |       |       |      |        |                                                                                                                                                                                                                                                                                             |     |         |    |    |    |      |      |      |
|-----|-------|-------|------|--------|---------------------------------------------------------------------------------------------------------------------------------------------------------------------------------------------------------------------------------------------------------------------------------------------|-----|---------|----|----|----|------|------|------|
| 954 | -0.01 | 1.03  | 0.69 | P49411 | Elongation factor Tu, mitochondrial (EF-Tu) (P43)                                                                                                                                                                                                                                           | 452 | TUFM    | 7  | 8  | 8  | 21.2 | 26.3 | 25   |
| 955 | -0.01 | 0.00  | 0.32 | P06730 | Eukaryotic translation initiation factor 4E (eIF-4E) (eIF4E) (eIF-4F 25 kDa subunit) (mRNA cap-binding protein)                                                                                                                                                                             | 217 | EIF4E   | 1  | 0  | 1  | 6.5  | 0    | 6.5  |
| 956 | 0.00  | 0.40  | 0.44 | P10619 | Lysosomal protective protein (EC 3.4.16.5) (Carboxypeptidase C) (Carboxypeptidase L) (Cathepsin A) (Protective protein cathepsin A) (PPCA) (Protective protein for beta-galactosidase) [Cleaved into: Lysosomal protective protein 32 kDa chain; Lysosomal protective protein 20 kDa chain] | 480 | CTSA    | 1  | 3  | 1  | 2.4  | 8    | 2.4  |
| 957 | 0.00  | 0.43  | 0.51 | Q71U36 | Tubulin alpha-1A chain (Alpha-tubulin 3) (Tubulin B-alpha-1) (Tubulin alpha-3 chain)                                                                                                                                                                                                        | 451 | TUBA1A  | 10 | 10 | 12 | 34.9 | 35.1 | 43   |
| 958 | 0.00  | 0.00  | 1.06 | Q9BQE3 | Tubulin alpha-1C chain (Alpha-tubulin 6) (Tubulin alpha-6 chain)                                                                                                                                                                                                                            | 449 | TUBA1C  | 10 | 11 | 12 | 32.3 | 35.6 | 39.9 |
| 959 | 0.00  | 0.00  | 0.23 | V9GYG0 | ADP/ATP translocase 1                                                                                                                                                                                                                                                                       | 208 | SLC25A4 | 3  | 3  | 3  | 15.9 | 15.9 | 16.8 |
| 960 | 0.00  | 0.90  | 0.00 | Q9Y6H1 | Coiled-coil-helix-coiled-coil-helix domain-containing protein 2 (Aging-associated gene 10 protein) (HCV NS2 trans-regulated protein) (NS2TP)                                                                                                                                                | 151 | CHCHD2  | 1  | 1  | 0  | 15.9 | 8.6  | 0    |
| 961 | 0.00  | 0.09  | 0.00 | Q71UM5 | 40S ribosomal protein S27-like                                                                                                                                                                                                                                                              | 84  | RPS27L  | 1  | 2  | 0  | 15.5 | 28.6 | 0    |
| 962 | 0.00  | -0.41 | 0.00 | C9J1Z8 | ADP-ribosylation factor 5 (Fragment)                                                                                                                                                                                                                                                        | 150 | ARF5    | 2  | 3  | 2  | 14   | 27.3 | 14   |
| 963 | 0.00  | 1.46  | 0.00 | Q15388 | Mitochondrial import receptor subunit TOM20 homolog (Mitochondrial 20 kDa outer membrane protein) (Outer mitochondrial membrane receptor Tom20)                                                                                                                                             | 145 | TOMM20  | 1  | 2  | 0  | 9    | 17.2 | 0    |

|     |      |       |      |            |                                                                                                                                                            |     |         |   |   |   |     |      |      |
|-----|------|-------|------|------------|------------------------------------------------------------------------------------------------------------------------------------------------------------|-----|---------|---|---|---|-----|------|------|
| 964 | 0.00 | 3.39  | 0.00 | P12273     | Prolactin-inducible protein (Gross cystic disease fluid protein 15) (GCDFP-15) (Prolactin-induced protein) (Secretory actin-binding protein) (SABP) (gp17) | 146 | PIP     | 1 | 5 | 1 | 8.2 | 33.6 | 8.2  |
| 965 | 0.00 | 0.42  | 0.00 | A0A087X1K9 | Acyl-protein thioesterase 1                                                                                                                                | 166 | LYPLA1  | 1 | 4 | 0 | 7.8 | 27.7 | 0    |
| 966 | 0.00 | 0.00  | 1.47 | K7ESM5     | Tubulin beta-6 chain (Fragment)                                                                                                                            | 338 | TUBB6   | 2 | 4 | 5 | 7.7 | 11.5 | 18.3 |
| 967 | 0.00 | 2.32  | 0.00 | C9J1E7     | AP-1 complex subunit beta-1 (Fragment)                                                                                                                     | 578 | AP1B1   | 3 | 2 | 2 | 6.9 | 6.2  | 5    |
| 968 | 0.00 | 1.20  | 0.00 | Q6P1L8     | 39S ribosomal protein L14, mitochondrial (L14mt) (MRP-L14) (39S ribosomal protein L32, mitochondrial) (L32mt) (MRP-L32)                                    | 145 | MRPL14  | 1 | 2 | 0 | 6.2 | 15.9 | 0    |
| 969 | 0.00 | 0.06  | 1.05 | Q5JR95     | 40S ribosomal protein S8                                                                                                                                   | 188 | RPS8    | 1 | 2 | 1 | 5.9 | 13.3 | 6.9  |
| 970 | 0.00 | -0.70 | 0.00 | E5RGX5     | Stathmin                                                                                                                                                   | 168 | STMN2   | 1 | 2 | 1 | 5.4 | 11.3 | 5.4  |
| 971 | 0.00 | 1.29  | 0.00 | P00403     | Cytochrome c oxidase subunit 2 (Cytochrome c oxidase polypeptide II)                                                                                       | 227 | MT-CO2  | 1 | 3 | 1 | 4.4 | 20.3 | 4.4  |
| 972 | 0.00 | 1.68  | 1.63 | O15173     | Membrane-associated progesterone receptor component 2 (Progesterone membrane-binding protein) (Steroid receptor protein DG6)                               | 223 | PGRMC2  | 1 | 2 | 3 | 4   | 12.6 | 18.8 |
| 973 | 0.00 | 0.78  | 0.00 | P08579     | U2 small nuclear ribonucleoprotein B" (U2 snRNP B")                                                                                                        | 225 | SNRNPB2 | 1 | 4 | 1 | 3.6 | 16   | 3.6  |
| 974 | 0.00 | -0.47 | 0.38 | A0A087WZK9 | Eukaryotic translation initiation factor 3 subunit H (eIF3h) (Eukaryotic translation initiation factor 3 subunit 3) (eIF-3 gamma) (eIF3 p40 subunit)       | 349 | EIF3H   | 1 | 1 | 3 | 3.4 | 2.6  | 12   |
| 975 | 0.00 | 0.44  | 0.24 | E9PCY7     | Heterogeneous nuclear ribonucleoprotein H                                                                                                                  | 429 | HNRNPH1 | 1 | 3 | 1 | 2.3 | 11.7 | 4    |

|     |      |           |      |                |                                                                                                                                                                                                              |      |        |   |   |   |   |      |      |
|-----|------|-----------|------|----------------|--------------------------------------------------------------------------------------------------------------------------------------------------------------------------------------------------------------|------|--------|---|---|---|---|------|------|
| 976 | 0.00 | 0.66      | 1.64 | P06748         | Nucleophosmin (NPM) (Nucleolar phosphoprotein B23) (Nucleolar protein NO38) (Numatrin)                                                                                                                       | 294  | NPM1   | 0 | 6 | 5 | 0 | 26.4 | 18.9 |
| 977 | 0.00 | 0.97      | 0.89 | P26006         | Integrin alpha-3 (CD49 antigen-like family member C) (FRP-2) (Galactoprotein B3) (GAPB3) (VLA-3 subunit alpha) (CD antigen CD49c) [Cleaved into: Integrin alpha-3 heavy chain; Integrin alpha-3 light chain] | 1051 | ITGA3  | 0 | 4 | 3 | 0 | 4.8  | 3.8  |
| 978 | 0.00 | 0.60      | 0.98 | P61081         | NEDD8-conjugating enzyme Ubc12 (EC 6.3.2.-) (NEDD8 carrier protein) (NEDD8 protein ligase) (Ubiquitin-conjugating enzyme E2 M)                                                                               | 183  | UBE2M  | 0 | 3 | 3 | 0 | 16.9 | 19.7 |
| 979 | 0.00 | 0.40      | 0.66 | P31153         | S-adenosylmethionine synthase isoform type-2 (AdoMet synthase 2) (EC 2.5.1.6) (Methionine adenosyltransferase 2) (MAT 2) (Methionine adenosyltransferase II) (MAT-II)                                        | 395  | MAT2A  | 0 | 1 | 3 | 0 | 3.8  | 8.1  |
| 980 | 0.00 | 0.00      | 2.43 | E9PC52         | Histone-binding protein RBBP7                                                                                                                                                                                | 416  | RBBP7  | 0 | 0 | 3 | 0 | 0    | 13.2 |
| 981 | 0.00 | 0.00      | 0.84 | P14868         | Aspartate--tRNA ligase, cytoplasmic (EC 6.1.1.12) (Aspartyl-tRNA synthetase) (AspRS) (Cell proliferation-inducing gene 40 protein)                                                                           | 501  | DARS   | 0 | 0 | 3 | 0 | 0    | 7    |
| 982 | 0.00 | 0.65      | 1.84 | Q71UI9         | Histone H2A.V (H2A.F/Z)                                                                                                                                                                                      | 128  | H2AFV  | 0 | 4 | 2 | 0 | 31.2 | 18.8 |
| 983 | 0.00 | -<br>0.47 | 1.75 | A0A096L<br>PI6 | Uncharacterized protein                                                                                                                                                                                      | 238  |        | 0 | 3 | 2 | 0 | 14.7 | 13.4 |
| 984 | 0.00 | -<br>0.55 | 0.21 | H3BPH4         | Phosphomannomutase (EC 5.4.2.8) (Fragment)                                                                                                                                                                   | 142  | PMM2   | 0 | 2 | 2 | 0 | 16.2 | 14.1 |
| 985 | 0.00 | 0.93      | 0.48 | A0A087<br>WX29 | TAR DNA-binding protein 43 (Fragment)                                                                                                                                                                        | 243  | TARDBP | 0 | 1 | 2 | 0 | 4.9  | 12.3 |
| 986 | 0.00 | 2.15      | 2.68 | A0A087<br>WZZ5 | Splicing factor 3B subunit 2                                                                                                                                                                                 | 871  | SF3B2  | 0 | 1 | 2 | 0 | 1.6  | 3.1  |
| 987 | 0.00 | 0.83      | 1.84 | A0A0A0<br>MSJ0 | ATP-dependent RNA helicase DDX42                                                                                                                                                                             | 708  | DDX42  | 0 | 1 | 2 | 0 | 1.6  | 5.8  |

|     |      |      |       |            |                                                                                                                                                                                                                                                                                              |      |          |   |   |   |   |     |      |
|-----|------|------|-------|------------|----------------------------------------------------------------------------------------------------------------------------------------------------------------------------------------------------------------------------------------------------------------------------------------------|------|----------|---|---|---|---|-----|------|
| 988 | 0.00 | 0.50 | -0.31 | P11717     | Cation-independent mannose-6-phosphate receptor (CI Man-6-P receptor) (CI-MPR) (M6PR) (300 kDa mannose 6-phosphate receptor) (MPR 300) (Insulin-like growth factor 2 receptor) (Insulin-like growth factor II receptor) (IGF-II receptor) (M6P/IGF2 receptor) (M6P/IGF2R) (CD antigen CD222) | 2491 | IGF2R    | 0 | 1 | 2 | 0 | 0.4 | 0.8  |
| 989 | 0.00 | 0.80 | 1.02  | P23634     | Plasma membrane calcium-transporting ATPase 4 (PMCA4) (EC 3.6.3.8) (Matrix-remodeling-associated protein 1) (Plasma membrane calcium ATPase isoform 4) (Plasma membrane calcium pump isoform 4)                                                                                              | 1241 | ATP2B4   | 0 | 1 | 2 | 0 | 1.6 | 3.1  |
| 990 | 0.00 | 0.17 | 0.63  | P30740     | Leukocyte elastase inhibitor (LEI) (Monocyte/neutrophil elastase inhibitor) (EI) (M/NEI) (Peptidase inhibitor 2) (PI-2) (Serpine B1)                                                                                                                                                         | 379  | SERPINE1 | 0 | 1 | 2 | 0 | 3.7 | 6.6  |
| 991 | 0.00 | 0.85 | 0.49  | Q6P587     | Acylpyruvate FAHD1, mitochondrial (EC 3.7.1.5) (Fumarylacetoacetate hydrolase domain-containing protein 1) (Oxaloacetate decarboxylase) (OAA decarboxylase) (EC 4.1.1.3) (YisK-like protein)                                                                                                 | 224  | FAHD1    | 0 | 1 | 2 | 0 | 7.1 | 13.4 |
| 992 | 0.00 | 0.00 | 1.08  | A0A024R4E5 | High density lipoprotein binding protein (Vigilin), isoform CRA_a (Vigilin)                                                                                                                                                                                                                  | 1268 | HDLBP    | 0 | 0 | 2 | 0 | 0   | 2.1  |
| 993 | 0.00 | 0.00 | 2.02  | A0A087WZU1 | Protein-tyrosine-phosphatase (EC 3.1.3.48)                                                                                                                                                                                                                                                   | 2299 | PTPRQ    | 0 | 0 | 2 | 0 | 0   | 1.5  |
| 994 | 0.00 | 0.00 | -0.05 | E7EQL5     | Cytoplasmic dynein 1 intermediate chain 2 (Fragment)                                                                                                                                                                                                                                         | 305  | DYNC1I2  | 0 | 0 | 2 | 0 | 0   | 9.2  |
| 995 | 0.00 | 0.00 | 0.65  | F8VR84     | UPF0160 protein MYG1, mitochondrial                                                                                                                                                                                                                                                          | 213  | C12orf10 | 0 | 0 | 2 | 0 | 0   | 12.2 |

|      |      |      |      |        |                                                                                                                                                                                                                                                                                                                           |      |       |   |   |   |   |   |      |
|------|------|------|------|--------|---------------------------------------------------------------------------------------------------------------------------------------------------------------------------------------------------------------------------------------------------------------------------------------------------------------------------|------|-------|---|---|---|---|---|------|
| 996  | 0.00 | 0.00 | 1.06 | H7C3C5 | Polyribonucleotide nucleotidyltransferase 1, mitochondrial (Fragment)                                                                                                                                                                                                                                                     | 139  | PNPT1 | 0 | 0 | 2 | 0 | 0 | 20.1 |
| 997  | 0.00 | 0.00 | 1.17 | O95782 | AP-2 complex subunit alpha-1 (100 kDa coated vesicle protein A) (Adaptor protein complex AP-2 subunit alpha-1) (Adaptor-related protein complex 2 subunit alpha-1) (Alpha-adaptin A) (Alpha1-adaptin) (Clathrin assembly protein complex 2 alpha-A large chain) (Plasma membrane adaptor HA2/AP2 adaptin alpha A subunit) | 977  | AP2A1 | 0 | 0 | 2 | 0 | 0 | 2.2  |
| 998  | 0.00 | 0.00 | 0.35 | P07384 | Calpain-1 catalytic subunit (EC 3.4.22.52) (Calcium-activated neutral proteinase 1) (CANP 1) (Calpain mu-type) (Calpain-1 large subunit) (Cell proliferation-inducing gene 30 protein) (Micromolar-calpain) (muCANP)                                                                                                      | 714  | CAPN1 | 0 | 0 | 2 | 0 | 0 | 2.8  |
| 999  | 0.00 | 0.00 | 0.14 | P12270 | Nucleoprotein TPR (Megator) (NPC-associated intranuclear protein) (Translocated promoter region protein)                                                                                                                                                                                                                  | 2363 | TPR   | 0 | 0 | 2 | 0 | 0 | 2.9  |
| 1000 | 0.00 | 0.00 | 1.29 | P45974 | Ubiquitin carboxyl-terminal hydrolase 5 (EC 3.4.19.12) (Deubiquitinating enzyme 5) (Isopeptidase T) (Ubiquitin thioesterase 5) (Ubiquitin-specific-processing protease 5)                                                                                                                                                 | 858  | USP5  | 0 | 0 | 2 | 0 | 0 | 3.2  |
| 1001 | 0.00 | 0.00 | 1.72 | P46063 | ATP-dependent DNA helicase Q1 (EC 3.6.4.12) (DNA helicase, RecQ-like type 1) (RecQ1) (DNA-dependent ATPase Q1) (RecQ protein-like 1)                                                                                                                                                                                      | 649  | RECQL | 0 | 0 | 2 | 0 | 0 | 4.2  |



|      |      |      |       |        |                                                                                                                                                                                                            |      |        |   |   |   |   |      |      |
|------|------|------|-------|--------|------------------------------------------------------------------------------------------------------------------------------------------------------------------------------------------------------------|------|--------|---|---|---|---|------|------|
| 1002 | 0.00 | 0.00 | 0.92  | P67775 | Serine/threonine-protein phosphatase 2A catalytic subunit alpha isoform (PP2A-alpha) (EC 3.1.3.16) (Replication protein C) (RP-C)                                                                          | 309  | PPP2CA | 0 | 0 | 2 | 0 | 0    | 11.4 |
| 1003 | 0.00 | 0.00 | -1.61 | Q02818 | Nucleobindin-1 (CALNUC)                                                                                                                                                                                    | 461  | NUCB1  | 0 | 0 | 2 | 0 | 0    | 5    |
| 1004 | 0.00 | 0.00 | 0.98  | Q5T3Q7 | HEAT repeat-containing protein 1                                                                                                                                                                           | 2063 | HEATR1 | 0 | 0 | 2 | 0 | 0    | 1.2  |
| 1005 | 0.00 | 0.00 | 1.23  | Q8TEM1 | Nuclear pore membrane glycoprotein 210 (Nuclear pore protein gp210) (Nuclear envelope pore membrane protein POM 210) (POM210) (Nucleoporin Nup210) (Pore membrane protein of 210 kDa)                      | 1887 | NUP210 | 0 | 0 | 2 | 0 | 0    | 1.4  |
| 1006 | 0.00 | 0.00 | 1.42  | Q99426 | Tubulin-folding cofactor B (Cytoskeleton-associated protein 1) (Cytoskeleton-associated protein CKAPI) (Tubulin-specific chaperone B)                                                                      | 244  | TBCB   | 0 | 0 | 2 | 0 | 0    | 22.3 |
| 1007 | 0.00 | 0.00 | -0.28 | Q9BTV4 | Transmembrane protein 43 (Protein LUMA)                                                                                                                                                                    | 400  | TMEM43 | 0 | 0 | 2 | 0 | 0    | 6.2  |
| 1008 | 0.00 | 0.00 | 1.39  | Q9NR45 | Sialic acid synthase (N-acetylneuraminate synthase) (EC 2.5.1.56) (N-acetylneuraminate-9-phosphate synthase) (EC 2.5.1.57) (N-acetylneuraminic acid phosphate synthase) (N-acetylneuraminic acid synthase) | 359  | NANS   | 0 | 0 | 2 | 0 | 0    | 6.7  |
| 1009 | 0.00 | 4.31 | 3.06  | P06702 | Protein S100-A9 (Calgranulin-B) (Calprotectin L1H subunit) (Leukocyte L1 complex heavy chain) (Migration inhibitory factor-related protein 14) (MRP-14) (p14) (S100 calcium-binding protein A9)            | 114  | S100A9 | 0 | 5 | 1 | 0 | 44.7 | 13.2 |

|      |      |      |       |        |                                                                                                                                                                                                                                                                                                                      |      |        |   |   |   |   |      |      |
|------|------|------|-------|--------|----------------------------------------------------------------------------------------------------------------------------------------------------------------------------------------------------------------------------------------------------------------------------------------------------------------------|------|--------|---|---|---|---|------|------|
| 1010 | 0.00 | 1.09 | 1.01  | F5GXX5 | Dolichyl-diphosphooligosaccharide--protein glycosyltransferase subunit DAD1 (Oligosaccharyl transferase subunit DAD1) (EC 2.4.99.18)                                                                                                                                                                                 | 85   | DAD1   | 0 | 4 | 1 | 0 | 47.1 | 14.1 |
| 1011 | 0.00 | 1.09 | 0.66  | H7C1U8 | Apolipoprotein O (Fragment)                                                                                                                                                                                                                                                                                          | 178  | APOO   | 0 | 4 | 1 | 0 | 30.9 | 8.4  |
| 1012 | 0.00 | 1.08 | 0.15  | O00483 | Cytochrome c oxidase subunit NDUFA4 (Complex I-MLRQ) (CI-MLRQ) (NADH-ubiquinone oxidoreductase MLRQ subunit)                                                                                                                                                                                                         | 81   | NDUFA4 | 0 | 4 | 1 | 0 | 46.9 | 12.3 |
| 1013 | 0.00 | 0.11 | 0.69  | P00568 | Adenylate kinase isoenzyme 1 (AK 1) (EC 2.7.4.3) (EC 2.7.4.6) (ATP-AMP transphosphorylase 1) (ATP:AMP phosphotransferase) (Adenylate monophosphate kinase) (Myokinase)                                                                                                                                               | 194  | AK1    | 0 | 4 | 1 | 0 | 30.9 | 6.7  |
| 1014 | 0.00 | 3.75 | 0.00  | P05109 | Protein S100-A8 (Calgranulin-A) (Calprotectin L1L subunit) (Cystic fibrosis antigen) (CFAG) (Leukocyte L1 complex light chain) (Migration inhibitory factor-related protein 8) (MRP-8) (p8) (S100 calcium-binding protein A8) (Urinary stone protein band A) [Cleaved into: Protein S100-A8, N-terminally processed] | 93   | S100A8 | 0 | 4 | 1 | 0 | 39.8 | 11.8 |
| 1015 | 0.00 | 1.17 | 1.65  | P63279 | SUMO-conjugating enzyme UBC9 (EC 6.3.2.-) (SUMO-protein ligase) (Ubiquitin carrier protein 9) (Ubiquitin carrier protein I) (Ubiquitin-conjugating enzyme E2 I) (Ubiquitin-protein ligase I) (p18)                                                                                                                   | 158  | UBE2I  | 0 | 4 | 1 | 0 | 34.2 | 7.6  |
| 1016 | 0.00 | 1.30 | 0.37  | Q8IVF2 | Protein AHNAK2                                                                                                                                                                                                                                                                                                       | 5795 | AHNAK2 | 0 | 4 | 1 | 0 | 2.1  | 2.4  |
| 1017 | 0.00 | 1.13 | 1.06  | B9A067 | MICOS complex subunit MIC60                                                                                                                                                                                                                                                                                          | 711  | IMMT   | 0 | 3 | 1 | 0 | 6.3  | 1.8  |
| 1018 | 0.00 | 0.58 | -0.22 | E9PN17 | ATP synthase subunit g, mitochondrial                                                                                                                                                                                                                                                                                | 76   | ATP5L  | 0 | 3 | 1 | 0 | 43.4 | 14.5 |

|      |      |       |       |        |                                                                                                                                            |     |          |   |   |   |   |      |      |
|------|------|-------|-------|--------|--------------------------------------------------------------------------------------------------------------------------------------------|-----|----------|---|---|---|---|------|------|
| 1019 | 0.00 | -0.28 | 2.29  | P00441 | Superoxide dismutase [Cu-Zn] (EC 1.15.1.1) (Superoxide dismutase 1) (hSod1)                                                                | 154 | SOD1     | 0 | 3 | 1 | 0 | 21.4 | 21.4 |
| 1020 | 0.00 | 1.13  | 1.07  | P24534 | Elongation factor 1-beta (EF-1-beta)                                                                                                       | 225 | EEF1B2   | 0 | 3 | 1 | 0 | 26.7 | 4    |
| 1021 | 0.00 | 0.79  | 0.32  | P49458 | Signal recognition particle 9 kDa protein (SRP9)                                                                                           | 86  | SRP9     | 0 | 3 | 1 | 0 | 34.9 | 12.8 |
| 1022 | 0.00 | -0.23 | 0.61  | Q99584 | Protein S100-A13 (S100 calcium-binding protein A13)                                                                                        | 98  | S100A13  | 0 | 3 | 1 | 0 | 33.7 | 12.2 |
| 1023 | 0.00 | -0.53 | -0.13 | Q9Y3F4 | Serine-threonine kinase receptor-associated protein (MAP activator with WD repeats) (UNR-interacting protein) (WD-40 repeat protein PT-WD) | 350 | STRAP    | 0 | 3 | 1 | 0 | 9.7  | 5.1  |
| 1024 | 0.00 | 1.28  | 1.22  | Q9Y5L4 | Mitochondrial import inner membrane translocase subunit Tim13                                                                              | 95  | TIMM13   | 0 | 3 | 1 | 0 | 44.2 | 11.6 |
| 1025 | 0.00 | -0.30 | -0.41 | C9J0K6 | Sorcin                                                                                                                                     | 155 | SRI      | 0 | 2 | 1 | 0 | 14.2 | 7.7  |
| 1026 | 0.00 | -0.21 | 0.55  | D6RCD0 | Estradiol 17-beta-dehydrogenase 11                                                                                                         | 256 | HSD17B11 | 0 | 2 | 1 | 0 | 10.2 | 3.9  |
| 1027 | 0.00 | 0.35  | 1.78  | E9PKZ0 | 60S ribosomal protein L8 (Fragment)                                                                                                        | 205 | RPL8     | 0 | 2 | 1 | 0 | 11.2 | 7.8  |
| 1028 | 0.00 | 1.51  | 2.78  | E9PQR7 | Vacuolar protein sorting-associated protein 28 homolog (Fragment)                                                                          | 161 | VPS28    | 0 | 2 | 1 | 0 | 21.7 | 15.5 |
| 1029 | 0.00 | 0.17  | 0.93  | F2Z2K0 | NSFL1 cofactor p47                                                                                                                         | 274 | NSFL1C   | 0 | 2 | 1 | 0 | 9.9  | 4    |
| 1030 | 0.00 | 1.98  | 1.58  | H0YLY7 | Calcineurin B homologous protein 1 (Fragment)                                                                                              | 91  | CHP1     | 0 | 2 | 1 | 0 | 30.8 | 17.6 |
| 1031 | 0.00 | 1.19  | 0.91  | H0YNK8 | ER membrane protein complex subunit 4                                                                                                      | 102 | EMC4     | 0 | 2 | 1 | 0 | 25.5 | 15.7 |
| 1032 | 0.00 | 2.70  | 2.16  | J3QQY2 | Transmembrane and coiled-coil domain-containing protein 1 (Transmembrane and coiled-coil domains 1, isoform CRA_c)                         | 104 | TMCO1    | 0 | 2 | 1 | 0 | 27.9 | 14.4 |
| 1033 | 0.00 | 2.10  | 1.33  | O14925 | Mitochondrial import inner membrane translocase subunit Tim23                                                                              | 209 | TIMM23   | 0 | 2 | 1 | 0 | 12   | 8.1  |

|      |      |       |       |        |                                                                                                                                                                                |     |         |   |   |   |   |      |      |
|------|------|-------|-------|--------|--------------------------------------------------------------------------------------------------------------------------------------------------------------------------------|-----|---------|---|---|---|---|------|------|
| 1034 | 0.00 | 0.91  | 0.91  | O43181 | NADH dehydrogenase [ubiquinone] iron-sulfur protein 4, mitochondrial (Complex I-18 kDa) (CI-18 kDa) (Complex I-AQDQ) (CI-AQDQ) (NADH-ubiquinone oxidoreductase 18 kDa subunit) | 175 | NDUFS4  | 0 | 2 | 1 | 0 | 14.3 | 8.6  |
| 1035 | 0.00 | -0.53 | -0.16 | O43399 | Tumor protein D54 (hD54) (Tumor protein D52-like 2)                                                                                                                            | 206 | TPD52L2 | 0 | 2 | 1 | 0 | 12.9 | 6.1  |
| 1036 | 0.00 | -0.93 | 1.31  | O75368 | SH3 domain-binding glutamic acid-rich-like protein                                                                                                                             | 114 | SH3BGRL | 0 | 2 | 1 | 0 | 21.9 | 15.8 |
| 1037 | 0.00 | 1.53  | 0.32  | P20674 | Cytochrome c oxidase subunit 5A, mitochondrial (Cytochrome c oxidase polypeptide Va)                                                                                           | 150 | COX5A   | 0 | 2 | 1 | 0 | 15.3 | 12.7 |
| 1038 | 0.00 | 1.31  | 1.33  | P56134 | ATP synthase subunit f, mitochondrial                                                                                                                                          | 94  | ATP5J2  | 0 | 2 | 1 | 0 | 49   | 14.3 |
| 1039 | 0.00 | 0.32  | 0.37  | P61009 | Signal peptidase complex subunit 3 (EC 3.4.-.-) (Microsomal signal peptidase 22/23 kDa subunit) (SPC22/23) (SPase 22/23 kDa subunit)                                           | 180 | SPCS3   | 0 | 2 | 1 | 0 | 12.8 | 6.1  |
| 1040 | 0.00 | -0.60 | 0.19  | P62993 | Growth factor receptor-bound protein 2 (Adapter protein GRB2) (Protein Ash) (SH2/SH3 adapter GRB2)                                                                             | 217 | GRB2    | 0 | 2 | 1 | 0 | 9.7  | 3.4  |
| 1041 | 0.00 | 1.04  | 1.61  | P84090 | Enhancer of rudimentary homolog                                                                                                                                                | 104 | ERH     | 0 | 2 | 1 | 0 | 21.2 | 10.6 |
| 1042 | 0.00 | 0.90  | 0.88  | Q03135 | Caveolin-1                                                                                                                                                                     | 178 | CAV1    | 0 | 2 | 1 | 0 | 10.7 | 7.9  |
| 1043 | 0.00 | 0.83  | 1.36  | Q16629 | Serine/arginine-rich splicing factor 7 (Splicing factor 9G8) (Splicing factor, arginine/serine-rich 7)                                                                         | 238 | SRSF7   | 0 | 2 | 1 | 0 | 19.7 | 9.1  |
| 1044 | 0.00 | 0.19  | 0.76  | Q5JWB9 | Transmembrane protein 230 (Fragment)                                                                                                                                           | 74  | TMEM230 | 0 | 2 | 1 | 0 | 33.8 | 18.9 |

|      |      |       |       |            |                                                                                                                                                             |      |         |   |   |   |   |      |      |
|------|------|-------|-------|------------|-------------------------------------------------------------------------------------------------------------------------------------------------------------|------|---------|---|---|---|---|------|------|
| 1045 | 0.00 | 0.17  | 1.10  | Q5VTU3     | Dynein light chain Tctex-type 1 (Dynein, light chain, Tctex-type 1, isoform CRA_a)                                                                          | 92   | DYNLT1  | 0 | 2 | 1 | 0 | 37   | 17.4 |
| 1046 | 0.00 | 1.36  | -1.05 | Q9C002     | Normal mucosa of esophagus-specific gene 1 protein (Protein FOAP-11)                                                                                        | 83   | NMES1   | 0 | 2 | 1 | 0 | 27.7 | 9.6  |
| 1047 | 0.00 | 1.19  | -0.05 | Q9NVJ2     | ADP-ribosylation factor-like protein 8B (ADP-ribosylation factor-like protein 10C) (Novel small G protein indispensable for equal chromosome segregation 1) | 186  | ARL8B   | 0 | 2 | 1 | 0 | 21.5 | 8.6  |
| 1048 | 0.00 | 0.67  | 0.84  | Q9Y248     | DNA replication complex GINS protein PSF2 (GINS complex subunit 2)                                                                                          | 185  | GINS2   | 0 | 2 | 1 | 0 | 14.1 | 7    |
| 1049 | 0.00 | -0.10 | 0.03  | A0A087WU14 | Secretory carrier-associated membrane protein 1 (Fragment)                                                                                                  | 206  | SCAMP1  | 0 | 1 | 1 | 0 | 11.2 | 11.2 |
| 1050 | 0.00 | 3.16  | 4.57  | C9JHF5     | Mitochondrial fission factor (Fragment)                                                                                                                     | 138  | MFF     | 0 | 1 | 1 | 0 | 13   | 19.6 |
| 1051 | 0.00 | 1.28  | 0.47  | E7EU96     | Casein kinase II subunit alpha                                                                                                                              | 385  | CSNK2A1 | 0 | 1 | 1 | 0 | 3.9  | 3.9  |
| 1052 | 0.00 | 0.00  | 1.38  | E7EW33     | Cytoplasmic FMR1-interacting protein 2                                                                                                                      | 1057 | CYFIP2  | 0 | 1 | 1 | 0 | 0.9  | 1    |
| 1053 | 0.00 | 0.87  | 0.96  | F5GYK7     | Glycerol-3-phosphate dehydrogenase (EC 1.1.5.3)                                                                                                             | 379  | GPD2    | 0 | 1 | 1 | 0 | 2.4  | 4.2  |
| 1054 | 0.00 | 0.39  | 0.36  | F5H6P7     | Protein mago nashi homolog 2                                                                                                                                | 102  | MAGOHB  | 0 | 1 | 1 | 0 | 10.8 | 10.8 |
| 1055 | 0.00 | 1.67  | 2.60  | G3V1U5     | Golgi transport 1 homolog B ( <i>S. cerevisiae</i> ), isoform CRA_c (Vesicle transport protein GOT1B)                                                       | 74   | GOLT1B  | 0 | 1 | 1 | 0 | 18.9 | 20.3 |
| 1056 | 0.00 | 1.11  | 2.91  | G3V2V8     | Epididymal secretory protein E1 (Fragment)                                                                                                                  | 122  | NPC2    | 0 | 1 | 1 | 0 | 7.4  | 18.9 |
| 1057 | 0.00 | 0.71  | 1.30  | G3V4F2     | Acyl-coenzyme A thioesterase 1                                                                                                                              | 395  | ACOT1   | 0 | 1 | 1 | 0 | 2.8  | 2.8  |
| 1058 | 0.00 | 9.25  | 0.84  | H0YE25     | Parkinson disease 7 domain-containing protein 1 (Fragment)                                                                                                  | 144  | PDDC1   | 0 | 1 | 1 | 0 | 6.2  | 6.9  |
| 1059 | 0.00 | 1.35  | 1.73  | H7BZ81     | All-trans-retinol 13,14-reductase (Fragment)                                                                                                                | 320  | RETSAT  | 0 | 1 | 1 | 0 | 3.8  | 5.6  |

|      |      |      |       |        |                                                                                                                                                                                                                                                                                                            |     |         |   |   |   |   |      |      |
|------|------|------|-------|--------|------------------------------------------------------------------------------------------------------------------------------------------------------------------------------------------------------------------------------------------------------------------------------------------------------------|-----|---------|---|---|---|---|------|------|
| 1060 | 0.00 | 1.12 | 1.15  | H7C3P7 | Ras-related protein Ral-A (Fragment)                                                                                                                                                                                                                                                                       | 164 | RALA    | 0 | 1 | 1 | 0 | 9.1  | 9.1  |
| 1061 | 0.00 | 2.54 | 0.07  | J3KT68 | Transmembrane protein 97                                                                                                                                                                                                                                                                                   | 92  | TMEM97  | 0 | 1 | 1 | 0 | 16.3 | 8.7  |
| 1062 | 0.00 | 1.46 | 1.62  | J3QLR8 | 28S ribosomal protein S23, mitochondrial                                                                                                                                                                                                                                                                   | 152 | MRPS23  | 0 | 1 | 1 | 0 | 6.6  | 6.6  |
| 1063 | 0.00 | 1.39 | 1.87  | K7EM02 | Katanin p60 ATPase-containing subunit A-like 2 (Fragment)                                                                                                                                                                                                                                                  | 128 | KATNAL2 | 0 | 1 | 1 | 0 | 9.4  | 9.4  |
| 1064 | 0.00 | 1.19 | 1.17  | K7ENI6 | Uncharacterized protein                                                                                                                                                                                                                                                                                    | 41  |         | 0 | 1 | 1 | 0 | 68.3 | 68.3 |
| 1065 | 0.00 | 0.51 | 1.33  | M0QY80 | Persulfide dioxygenase ETHE1, mitochondrial                                                                                                                                                                                                                                                                | 95  | ETHE1   | 0 | 1 | 1 | 0 | 14.7 | 14.7 |
| 1066 | 0.00 | 0.31 | -0.20 | O14672 | Disintegrin and metalloproteinase domain-containing protein 10 (ADAM 10) (EC 3.4.24.81) (CDw156) (Kuzbanian protein homolog) (Mammalian disintegrin-metalloprotease) (CD antigen CD156c)                                                                                                                   | 748 | ADAM10  | 0 | 1 | 1 | 0 | 1.6  | 1.6  |
| 1067 | 0.00 | 0.85 | -0.69 | O14975 | Very long-chain acyl-CoA synthetase (VLACS) (VLCS) (EC 6.2.1.-) (Fatty acid transport protein 2) (FATP-2) (Fatty-acid-coenzyme A ligase, very long-chain 1) (Long-chain-fatty-acid--CoA ligase) (EC 6.2.1.3) (Solute carrier family 27 member 2) (THCA-CoA ligase) (Very long-chain-fatty-acid-CoA ligase) | 620 | SLC27A2 | 0 | 1 | 1 | 0 | 3.5  | 1.9  |

|      |      |       |      |        |                                                                                                                                                                                                                                                                                                                                                                                  |     |         |   |   |   |   |      |      |
|------|------|-------|------|--------|----------------------------------------------------------------------------------------------------------------------------------------------------------------------------------------------------------------------------------------------------------------------------------------------------------------------------------------------------------------------------------|-----|---------|---|---|---|---|------|------|
| 1068 | 0.00 | 0.68  | 1.37 | O75915 | PRA1 family protein 3 (ADP-ribosylation factor-like protein 6-interacting protein 5) (ARL-6-interacting protein 5) (Aip-5) (Cytoskeleton-related vitamin A-responsive protein) (Dermal papilla-derived protein 11) (GTRAP3-18) (Glutamate transporter EAAC1-interacting protein) (JM5) (Prenylated Rab acceptor protein 2) (Protein JWa) (Putative MAPK-activating protein PM27) | 188 | ARL6IP5 | 0 | 1 | 1 | 0 | 10.1 | 10.1 |
| 1069 | 0.00 | 0.82  | 0.75 | P01034 | Cystatin-C (Cystatin-3) (Gamma-trace) (Neuroendocrine basic polypeptide) (Post-gamma-globulin)                                                                                                                                                                                                                                                                                   | 146 | CST3    | 0 | 1 | 1 | 0 | 7.5  | 7.5  |
| 1070 | 0.00 | -0.97 | 0.31 | P11908 | Ribose-phosphate pyrophosphokinase 2 (EC 2.7.6.1) (PPRibP) (Phosphoribosyl pyrophosphate synthase II) (PRS-II)                                                                                                                                                                                                                                                                   | 318 | PRPS2   | 0 | 1 | 1 | 0 | 3.1  | 3.1  |
| 1071 | 0.00 | 1.98  | 1.09 | P14174 | Macrophage migration inhibitory factor (MIF) (EC 5.3.2.1) (Glycosylation-inhibiting factor) (GIF) (L-dopachrome isomerase) (L-dopachrome tautomerase) (EC 5.3.3.12) (Phenylpyruvate tautomerase)                                                                                                                                                                                 | 115 | MIF     | 0 | 1 | 1 | 0 | 7.8  | 9.6  |
| 1072 | 0.00 | 2.17  | 2.22 | P14678 | Small nuclear ribonucleoprotein-associated proteins B and B' (snRNP-B) (Sm protein B/B') (Sm-B/B') (SmB/B')                                                                                                                                                                                                                                                                      | 240 | SNRNPB  | 0 | 1 | 1 | 0 | 6.1  | 6.1  |
| 1073 | 0.00 | 0.55  | 2.01 | P15927 | Replication protein A 32 kDa subunit (RP-A p32) (Replication factor A protein 2) (RF-A protein 2) (Replication protein A 34 kDa subunit) (RP-A p34)                                                                                                                                                                                                                              | 270 | RPA2    | 0 | 1 | 1 | 0 | 3    | 5.2  |

|      |      |       |       |        |                                                                                                                                                                                                                                                       |      |         |   |   |   |   |      |      |
|------|------|-------|-------|--------|-------------------------------------------------------------------------------------------------------------------------------------------------------------------------------------------------------------------------------------------------------|------|---------|---|---|---|---|------|------|
| 1074 | 0.00 | 2.09  | 2.25  | P17152 | Transmembrane protein 11, mitochondrial (Protein PMI) (Protein PMI)                                                                                                                                                                                   | 192  | TMEM11  | 0 | 1 | 1 | 0 | 8.3  | 8.3  |
| 1075 | 0.00 | 1.26  | 0.33  | P17568 | NADH dehydrogenase [ubiquinone] 1 beta subcomplex subunit 7 (Cell adhesion protein SQM1) (Complex I-B18) (CI-B18) (NADH-ubiquinone oxidoreductase B18 subunit)                                                                                        | 137  | NDUFB7  | 0 | 1 | 1 | 0 | 7.3  | 7.3  |
| 1076 | 0.00 | -0.18 | 1.27  | P35754 | Glutaredoxin-1 (Thioltransferase-1) (TTase-1)                                                                                                                                                                                                         | 106  | GLRX    | 0 | 1 | 1 | 0 | 10.4 | 10.4 |
| 1077 | 0.00 | -0.11 | 0.60  | P52434 | DNA-directed RNA polymerases I, II, and III subunit RPABC3 (RNA polymerases I, II, and III subunit ABC3) (DNA-directed RNA polymerase II subunit H) (DNA-directed RNA polymerases I, II, and III 17.1 kDa polypeptide) (RPB17) (RPB8 homolog) (hRPB8) | 150  | POLR2H  | 0 | 1 | 1 | 0 | 7.4  | 9.8  |
| 1078 | 0.00 | 2.34  | 1.27  | P60903 | Protein S100-A10 (Calpactin I light chain) (Calpactin-1 light chain) (Cellular ligand of annexin II) (S100 calcium-binding protein A10) (p10 protein) (p11)                                                                                           | 97   | S100A10 | 0 | 1 | 1 | 0 | 17.5 | 17.5 |
| 1079 | 0.00 | -0.57 | -0.15 | P61011 | Signal recognition particle 54 kDa protein (SRP54)                                                                                                                                                                                                    | 504  | SRP54   | 0 | 1 | 1 | 0 | 2.4  | 2.4  |
| 1080 | 0.00 | 0.30  | 0.36  | P62273 | 40S ribosomal protein S29                                                                                                                                                                                                                             | 56   | RPS29   | 0 | 1 | 1 | 0 | 19.6 | 14.3 |
| 1081 | 0.00 | 2.39  | 0.89  | P78347 | General transcription factor II-I (GTFII-I) (TFII-I) (Bruton tyrosine kinase-associated protein 135) (BAP-135) (BTK-associated protein 135) (SRF-Phox1-interacting protein) (SPIN) (Williams-Beuren syndrome chromosomal region 6 protein)            | 998  | GTF2I   | 0 | 1 | 1 | 0 | 0.9  | 1.3  |
| 1082 | 0.00 | 6.44  | 2.92  | Q15058 | Kinesin-like protein KIF14                                                                                                                                                                                                                            | 1648 | KIF14   | 0 | 1 | 1 | 0 | 0.7  | 0.7  |



|      |      |           |       |        |                                                                                                                                                                                                                               |      |         |   |   |   |   |      |      |
|------|------|-----------|-------|--------|-------------------------------------------------------------------------------------------------------------------------------------------------------------------------------------------------------------------------------|------|---------|---|---|---|---|------|------|
| 1083 | 0.00 | 1.00      | 2.57  | Q15149 | Plectin (PCN) (PLTN)<br>(Hemidesmosomal protein 1) (HD1)<br>(Plectin-1)                                                                                                                                                       | 4684 | PLEC    | 0 | 1 | 1 | 0 | 0.3  | 0.3  |
| 1084 | 0.00 | 0.03      | 3.59  | Q6P2Q9 | Pre-mRNA-processing-splicing factor<br>8 (220 kDa U5 snRNP-specific<br>protein) (PRP8 homolog) (Splicing<br>factor Prp8) (p220)                                                                                               | 2335 | PRPF8   | 0 | 1 | 1 | 0 | 0.3  | 1.1  |
| 1085 | 0.00 | 1.89      | 1.54  | Q8N6L1 | Keratinocyte-associated protein 2<br>(KCP-2)                                                                                                                                                                                  | 136  | KRTCAP2 | 0 | 1 | 1 | 0 | 12.5 | 12.5 |
| 1086 | 0.00 | 0.42      | 1.32  | Q93009 | Ubiquitin carboxyl-terminal hydrolase<br>7 (EC 3.4.19.12) (Deubiquitinating<br>enzyme 7) (Herpesvirus-associated<br>ubiquitin-specific protease) (Ubiquitin<br>thioesterase 7) (Ubiquitin-specific-<br>processing protease 7) | 1102 | USP7    | 0 | 1 | 1 | 0 | 1.2  | 1.1  |
| 1087 | 0.00 | 0.29      | 1.00  | Q96TA1 | Niban-like protein 1 (Meg-3)<br>(Melanoma invasion by ERK)<br>(MINERVA) (Protein FAM129B)                                                                                                                                     | 746  | FAM129B | 0 | 1 | 1 | 0 | 1.8  | 1.8  |
| 1088 | 0.00 | -<br>0.31 | 1.90  | Q99436 | Proteasome subunit beta type-7 (EC<br>3.4.25.1) (Macropain chain Z)<br>(Multicatalytic endopeptidase<br>complex chain Z) (Proteasome<br>subunit Z)                                                                            | 277  | PSMB7   | 0 | 1 | 1 | 0 | 3.2  | 4.7  |
| 1089 | 0.00 | 0.00      | 1.24  | Q9NPA8 | Transcription and mRNA export<br>factor ENY2 (Enhancer of yellow 2<br>transcription factor homolog)                                                                                                                           | 101  | ENY2    | 0 | 1 | 1 | 0 | 9.4  | 17.7 |
| 1090 | 0.00 | 2.65      | 2.47  | Q9UBI6 | Guanine nucleotide-binding protein<br>G(I)/G(S)/G(O) subunit gamma-12                                                                                                                                                         | 72   | GNG12   | 0 | 1 | 1 | 0 | 22.2 | 25   |
| 1091 | 0.00 | -<br>0.20 | 0.30  | Q9UHV9 | Prefoldin subunit 2                                                                                                                                                                                                           | 154  | PFDN2   | 0 | 1 | 1 | 0 | 7.8  | 7.8  |
| 1092 | 0.00 | 1.26      | 0.97  | S4R3B5 | Protein transport protein Sec61<br>subunit beta                                                                                                                                                                               | 42   | SEC61B  | 0 | 1 | 1 | 0 | 23.8 | 23.8 |
| 1093 | 0.00 | -<br>0.58 | -0.37 | U3KQT1 | S-formylglutathione hydrolase<br>(Fragment)                                                                                                                                                                                   | 120  | ESD     | 0 | 1 | 1 | 0 | 7.5  | 7.5  |

|      |      |      |       |            |                                                                                         |     |               |   |   |   |   |   |      |
|------|------|------|-------|------------|-----------------------------------------------------------------------------------------|-----|---------------|---|---|---|---|---|------|
| 1094 | 0.00 | 0.00 | 0.12  | A0A087WTA2 | Protein SYNJ2BP-COX16                                                                   | 40  | SYNJ2BP-COX16 | 0 | 0 | 1 | 0 | 0 | 35   |
| 1095 | 0.00 | 0.00 | 2.48  | C9JUG7     | F-actin-capping protein subunit alpha-2                                                 | 146 | CAPZA2        | 0 | 0 | 1 | 0 | 0 | 12.3 |
| 1096 | 0.00 | 0.00 | 1.64  | D6RDY6     | Signal recognition particle subunit SRP72 (Fragment)                                    | 357 | SRP72         | 0 | 0 | 1 | 0 | 0 | 5.3  |
| 1097 | 0.00 | 0.00 | 1.03  | D6RGI3     | Septin 11, isoform CRA_b (Septin-11)                                                    | 425 | sept11        | 0 | 0 | 1 | 0 | 0 | 3.1  |
| 1098 | 0.00 | 0.00 | -0.22 | D6RH17     | Alcohol dehydrogenase 6 (Fragment)                                                      | 257 | ADH6          | 0 | 0 | 1 | 0 | 0 | 3.9  |
| 1099 | 0.00 | 0.00 | 1.14  | D6RHZ5     | Protein transport protein Sec31A                                                        | 877 | SEC31A        | 0 | 0 | 1 | 0 | 0 | 1.5  |
| 1100 | 0.00 | 0.00 | -0.15 | E5RIX8     | Tubulin-specific chaperone A                                                            | 79  | TBCA          | 0 | 0 | 1 | 0 | 0 | 12.7 |
| 1101 | 0.00 | 0.00 | 2.51  | E7EMM4     | Acid ceramidase                                                                         | 370 | ASAHI         | 0 | 0 | 1 | 0 | 0 | 4.6  |
| 1102 | 0.00 | 0.00 | 2.39  | F5GX77     | Multifunctional methyltransferase subunit TRM112-like protein                           | 106 | TRMT112       | 0 | 0 | 1 | 0 | 0 | 12.3 |
| 1103 | 0.00 | 0.00 | 0.60  | F8VVL1     | Density-regulated protein                                                               | 160 | DENR          | 0 | 0 | 1 | 0 | 0 | 5    |
| 1104 | 0.00 | 0.00 | 0.43  | F8VWV8     | 3'(2'),5'-bisphosphate nucleotidase 1 (Fragment)                                        | 130 | BPNT1         | 0 | 0 | 1 | 0 | 0 | 8.5  |
| 1105 | 0.00 | 0.00 | 0.54  | F8WJN3     | Cleavage and polyadenylation-specificity factor subunit 6                               | 478 | CPSF6         | 0 | 0 | 1 | 0 | 0 | 2.9  |
| 1106 | 0.00 | 0.00 | 0.38  | H0Y9Q1     | Cytosol aminopeptidase (Fragment)                                                       | 208 | LAP3          | 0 | 0 | 1 | 0 | 0 | 8.7  |
| 1107 | 0.00 | 0.00 | 1.20  | H0YDS0     | Ubiquilin-1 (Fragment)                                                                  | 157 | UBQLN1        | 0 | 0 | 1 | 0 | 0 | 10.2 |
| 1108 | 0.00 | 0.00 | 3.28  | H0YE46     | RNA-binding protein 25 (Fragment)                                                       | 73  | RBM25         | 0 | 0 | 1 | 0 | 0 | 20.5 |
| 1109 | 0.00 | 0.00 | 4.86  | H0YFA4     | Cysteine-rich protein 2 (Fragment)                                                      | 192 | CRIP2         | 0 | 0 | 1 | 0 | 0 | 16.7 |
| 1110 | 0.00 | 0.00 | 1.27  | I3L252     | Bifunctional ATP-dependent dihydroxyacetone kinase/FAD-AMP lyase (cyclizing) (Fragment) | 219 | DAK           | 0 | 0 | 1 | 0 | 0 | 5.5  |
| 1111 | 0.00 | 0.00 | 0.96  | J3QLD9     | Flotillin-2 (HCG1998851, isoform CRA_h)                                                 | 428 | FLOT2         | 0 | 0 | 1 | 0 | 0 | 4.4  |
| 1112 | 0.00 | 0.00 | 1.63  | K7EMV3     | Histone H3                                                                              | 92  | H3F3B         | 0 | 0 | 1 | 0 | 0 | 7.6  |
| 1113 | 0.00 | 0.00 | 1.23  | K7EP16     | Eukaryotic translation initiation factor 3 subunit G (Fragment)                         | 118 | EIF3G         | 0 | 0 | 1 | 0 | 0 | 13.6 |

|      |      |      |      |        |                                                                                                                                                                                                                          |      |        |   |   |   |   |   |      |
|------|------|------|------|--------|--------------------------------------------------------------------------------------------------------------------------------------------------------------------------------------------------------------------------|------|--------|---|---|---|---|---|------|
| 1114 | 0.00 | 0.00 | 1.70 | O00170 | AH receptor-interacting protein (AIP) (Aryl-hydrocarbon receptor-interacting protein) (HBV X-associated protein 2) (XAP-2) (Immunophilin homolog ARA9)                                                                   | 330  | AIP    | 0 | 0 | 1 | 0 | 0 | 4.2  |
| 1115 | 0.00 | 0.00 | 0.77 | O43852 | Calumenin (Crococalbin) (IEF SSP 9302)                                                                                                                                                                                   | 315  | CALU   | 0 | 0 | 1 | 0 | 0 | 8.4  |
| 1116 | 0.00 | 0.00 | 3.17 | O43896 | Kinesin-like protein KIF1C                                                                                                                                                                                               | 1103 | KIF1C  | 0 | 0 | 1 | 0 | 0 | 0.8  |
| 1117 | 0.00 | 0.00 | 1.24 | O60869 | Endothelial differentiation-related factor 1 (EDF-1) (Multiprotein-bridging factor 1) (MBF1)                                                                                                                             | 148  | EDF1   | 0 | 0 | 1 | 0 | 0 | 10.1 |
| 1118 | 0.00 | 0.00 | 0.95 | O75436 | Vacuolar protein sorting-associated protein 26A (Vesicle protein sorting 26A) (hVPS26)                                                                                                                                   | 327  | VPS26A | 0 | 0 | 1 | 0 | 0 | 5.5  |
| 1119 | 0.00 | 0.00 | 4.01 | O75937 | DnaJ homolog subfamily C member 8 (Splicing protein spf31)                                                                                                                                                               | 253  | DNAJC8 | 0 | 0 | 1 | 0 | 0 | 11.5 |
| 1120 | 0.00 | 0.00 | 1.76 | P12074 | Cytochrome c oxidase subunit 6A1, mitochondrial (Cytochrome c oxidase polypeptide VIa-liver) (Cytochrome c oxidase subunit VIA-liver) (COX VIa-L)                                                                        | 109  | COX6A1 | 0 | 0 | 1 | 0 | 0 | 16.5 |
| 1121 | 0.00 | 0.00 | 2.35 | P13995 | Bifunctional methylenetetrahydrofolate dehydrogenase/cyclohydrolase, mitochondrial [Includes: NAD-dependent methylenetetrahydrofolate dehydrogenase (EC 1.5.1.15); Methenyltetrahydrofolate cyclohydrolase (EC 3.5.4.9)] | 350  | MTHFD2 | 0 | 0 | 1 | 0 | 0 | 9.3  |
| 1122 | 0.00 | 0.00 | 1.94 | P17174 | Aspartate aminotransferase, cytoplasmic (cAspAT) (EC 2.6.1.1) (EC 2.6.1.3) (Cysteine aminotransferase, cytoplasmic) (Cysteine transaminase, cytoplasmic) (cCAT) (Glutamate oxaloacetate transaminase 1) (Transaminase A) | 413  | GOT1   | 0 | 0 | 1 | 0 | 0 | 3.6  |

|      |      |      |       |        |                                                                                                                                                         |      |        |   |   |   |   |   |     |
|------|------|------|-------|--------|---------------------------------------------------------------------------------------------------------------------------------------------------------|------|--------|---|---|---|---|---|-----|
| 1123 | 0.00 | 0.00 | 2.22  | P18084 | Integrin beta-5                                                                                                                                         | 799  | ITGB5  | 0 | 0 | 1 | 0 | 0 | 2.5 |
| 1124 | 0.00 | 0.00 | -0.01 | P20073 | Annexin A7 (Annexin VII) (Annexin-7) (Synexin)                                                                                                          | 488  | ANXA7  | 0 | 0 | 1 | 0 | 0 | 1.9 |
| 1125 | 0.00 | 0.00 | 0.79  | P25685 | DnaJ homolog subfamily B member 1 (DnaJ protein homolog 1) (Heat shock 40 kDa protein 1) (HSP40) (Heat shock protein 40) (Human DnaJ protein 1) (hDj-1) | 340  | DNAJB1 | 0 | 0 | 1 | 0 | 0 | 2.9 |
| 1126 | 0.00 | 0.00 | 2.33  | P26196 | Probable ATP-dependent RNA helicase DDX6 (EC 3.6.4.13) (ATP-dependent RNA helicase p54) (DEAD box protein 6) (Oncogene RCK)                             | 483  | DDX6   | 0 | 0 | 1 | 0 | 0 | 3.5 |
| 1127 | 0.00 | 0.00 | 1.07  | P39023 | 60S ribosomal protein L3 (HIV-1 TAR RNA-binding protein B) (TARBP-B)                                                                                    | 403  | RPL3   | 0 | 0 | 1 | 0 | 0 | 2   |
| 1128 | 0.00 | 0.00 | 0.54  | P39748 | Flap endonuclease 1 (FEN-1) (EC 3.1.-.-) (DNase IV) (Flap structure-specific endonuclease 1) (Maturation factor 1) (MF1) (hFEN-1)                       | 380  | FEN1   | 0 | 0 | 1 | 0 | 0 | 4.2 |
| 1129 | 0.00 | 0.00 | 1.53  | Q13045 | Protein flightless-1 homolog                                                                                                                            | 1269 | FLII   | 0 | 0 | 1 | 0 | 0 | 0.8 |
| 1130 | 0.00 | 0.00 | 0.51  | Q13085 | Acetyl-CoA carboxylase 1 (ACC1) (EC 6.4.1.2) (ACC-alpha) [Includes: Biotin carboxylase (EC 6.3.4.14)]                                                   | 2346 | ACACA  | 0 | 0 | 1 | 0 | 0 | 0.5 |
| 1131 | 0.00 | 0.00 | 0.36  | Q14320 | Protein FAM50A (Protein HXC-26) (Protein XAP-5)                                                                                                         | 339  | FAM50A | 0 | 0 | 1 | 0 | 0 | 4.7 |
| 1132 | 0.00 | 0.00 | -0.10 | Q5QPP3 | UDP-glucose 4-epimerase (Fragment)                                                                                                                      | 227  | GALE   | 0 | 0 | 1 | 0 | 0 | 6.2 |
| 1133 | 0.00 | 0.00 | 0.18  | Q7KZ85 | Transcription elongation factor SPT6 (hSPT6) (Histone chaperone suppressor of Ty6) (Tat-cotransactivator 2 protein) (Tat-CT2 protein)                   | 1726 | SUPT6H | 0 | 0 | 1 | 0 | 0 | 1.5 |

|      |      |      |       |        |                                                                                                                                                                                                                                                                                                       |       |        |   |   |   |   |   |     |
|------|------|------|-------|--------|-------------------------------------------------------------------------------------------------------------------------------------------------------------------------------------------------------------------------------------------------------------------------------------------------------|-------|--------|---|---|---|---|---|-----|
| 1134 | 0.00 | 0.00 | 1.28  | Q8WVM8 | Sec1 family domain-containing protein 1 (SLY1 homolog) (Sly1p) (Syntaxin-binding protein 1-like 2)                                                                                                                                                                                                    | 642   | SCFD1  | 0 | 0 | 1 | 0 | 0 | 2.5 |
| 1135 | 0.00 | 0.00 | -0.14 | Q8WZ42 | Titin (EC 2.7.11.1) (Connectin) (Rhabdomyosarcoma antigen MU-RMS-40.14)                                                                                                                                                                                                                               | 34350 | TTN    | 0 | 0 | 1 | 0 | 0 | 0   |
| 1136 | 0.00 | 0.00 | 1.88  | Q92887 | Canalicular multispecific organic anion transporter 1 (ATP-binding cassette sub-family C member 2) (Canalicular multidrug resistance protein) (Multidrug resistance-associated protein 2)                                                                                                             | 1545  | ABCC2  | 0 | 0 | 1 | 0 | 0 | 1   |
| 1137 | 0.00 | 0.00 | 0.76  | Q93008 | Probable ubiquitin carboxyl-terminal hydrolase FAF-X (EC 3.4.19.12) (Deubiquitinating enzyme FAF-X) (Fat facets in mammals) (hFAM) (Fat facets protein-related, X-linked) (Ubiquitin thioesterase FAF-X) (Ubiquitin-specific protease 9, X chromosome) (Ubiquitin-specific-processing protease FAF-X) | 2570  | USP9X  | 0 | 0 | 1 | 0 | 0 | 0.5 |
| 1138 | 0.00 | 0.00 | 1.59  | Q96BS2 | Calcineurin B homologous protein 3 (Tescalcin) (TSC)                                                                                                                                                                                                                                                  | 214   | TESC   | 0 | 0 | 1 | 0 | 0 | 8   |
| 1139 | 0.00 | 0.00 | 2.18  | Q96GC9 | Vacuole membrane protein 1 (Transmembrane protein 49)                                                                                                                                                                                                                                                 | 406   | VMP1   | 0 | 0 | 1 | 0 | 0 | 14  |
| 1140 | 0.00 | 0.00 | 0.54  | Q96HE7 | ERO1-like protein alpha (ERO1-L) (ERO1-L-alpha) (EC 1.8.4.-) (Endoplasmic oxidoreductin-1-like protein) (Oxidoreductin-1-L-alpha)                                                                                                                                                                     | 468   | ERO1L  | 0 | 0 | 1 | 0 | 0 | 3   |
| 1141 | 0.00 | 0.00 | 2.13  | Q96K17 | Transcription factor BTF3 homolog 4 (Basic transcription factor 3-like 4)                                                                                                                                                                                                                             | 158   | BTF3L4 | 0 | 0 | 1 | 0 | 0 | 26  |

|      |      |      |       |        |                                                                                                                                                                                                                  |      |           |   |    |   |   |      |     |
|------|------|------|-------|--------|------------------------------------------------------------------------------------------------------------------------------------------------------------------------------------------------------------------|------|-----------|---|----|---|---|------|-----|
| 1142 | 0.00 | 0.00 | 0.60  | Q9BSH4 | Translational activator of cytochrome c oxidase 1 (Coiled-coil domain-containing protein 44) (Translational activator of mitochondrially-encoded cytochrome c oxidase I)                                         | 297  | TACO1     | 0 | 0  | 1 | 0 | 0    | 6.1 |
| 1143 | 0.00 | 0.00 | 0.99  | Q9BZX2 | Uridine-cytidine kinase 2 (UCK 2) (EC 2.7.1.48) (Cytidine monophosphokinase 2) (Testis-specific protein TSA903) (Uridine monophosphokinase 2)                                                                    | 261  | UCK2      | 0 | 0  | 1 | 0 | 0    | 6.9 |
| 1144 | 0.00 | 0.00 | 0.28  | Q9H0U6 | 39S ribosomal protein L18, mitochondrial (L18mt) (MRP-L18)                                                                                                                                                       | 180  | MRPL18    | 0 | 0  | 1 | 0 | 0    | 5   |
| 1145 | 0.00 | 0.00 | 0.24  | Q9Y512 | Sorting and assembly machinery component 50 homolog (Transformation-related gene 3 protein) (TRG-3)                                                                                                              | 469  | SAMM50    | 0 | 0  | 1 | 0 | 0    | 3.2 |
| 1146 | 0.00 | 0.00 | -0.11 | R4GN98 | Protein S100 (S100 calcium-binding protein) (Fragment)                                                                                                                                                           | 85   | S100A6    | 0 | 0  | 1 | 0 | 0    | 8.2 |
| 1147 | 0.00 | 0.00 | 1.29  | V9H019 | DNA mismatch repair protein Msh2 (MSH2 protein)                                                                                                                                                                  | 810  | MSH2      | 0 | 0  | 1 | 0 | 0    | 1.4 |
| 1148 | 0.00 | 4.06 | 0.00  | P15924 | Desmoplakin (DP) (250/210 kDa paraneoplastic pemphigus antigen)                                                                                                                                                  | 2871 | DSP       | 0 | 35 | 0 | 0 | 13.1 | 0   |
| 1149 | 0.00 | 4.04 | 0.00  | Q02413 | Desmoglein-1 (Cadherin family member 4) (Desmosomal glycoprotein 1) (DG1) (DGI) (Pemphigus foliaceus antigen)                                                                                                    | 1049 | DSG1      | 0 | 12 | 0 | 0 | 16.2 | 0   |
| 1150 | 0.00 | 3.40 | 0.00  | P31944 | Caspase-14 (CASP-14) (EC 3.4.22.-) [Cleaved into: Caspase-14 subunit p17, mature form; Caspase-14 subunit p10, mature form; Caspase-14 subunit p20, intermediate form; Caspase-14 subunit p8, intermediate form] | 242  | CASP14    | 0 | 5  | 0 | 0 | 17.8 | 0   |
| 1151 | 0.00 | 4.93 | 0.00  | Q96P63 | Serpin B12                                                                                                                                                                                                       | 405  | SERPINB12 | 0 | 5  | 0 | 0 | 12.3 | 0   |

|      |      |       |      |        |                                                                                                                                           |     |         |   |   |   |   |      |   |
|------|------|-------|------|--------|-------------------------------------------------------------------------------------------------------------------------------------------|-----|---------|---|---|---|---|------|---|
| 1152 | 0.00 | 0.39  | 0.00 | P09669 | Cytochrome c oxidase subunit 6C (Cytochrome c oxidase polypeptide VIc)                                                                    | 75  | COX6C   | 0 | 4 | 0 | 0 | 30.7 | 0 |
| 1153 | 0.00 | 4.10  | 0.00 | Q08554 | Desmocollin-1 (Cadherin family member 1) (Desmosomal glycoprotein 2/3) (DG2/DG3)                                                          | 894 | DSC1    | 0 | 4 | 0 | 0 | 6.2  | 0 |
| 1154 | 0.00 | 4.03  | 0.00 | Q5T749 | Keratinocyte proline-rich protein (hKPRP)                                                                                                 | 579 | KPRP    | 0 | 4 | 0 | 0 | 5    | 0 |
| 1155 | 0.00 | 0.13  | 0.00 | Q96FQ6 | Protein S100-A16 (Aging-associated gene 13 protein) (Protein S100-F) (S100 calcium-binding protein A16)                                   | 103 | S100A16 | 0 | 4 | 0 | 0 | 51.5 | 0 |
| 1156 | 0.00 | 1.16  | 0.00 | K7ESP4 | Dephospho-CoA kinase domain-containing protein (Fragment)                                                                                 | 209 | DCAKD   | 0 | 3 | 0 | 0 | 16.7 | 0 |
| 1157 | 0.00 | 1.27  | 0.00 | O95168 | NADH dehydrogenase [ubiquinone] 1 beta subcomplex subunit 4 (Complex I-B15) (CI-B15) (NADH-ubiquinone oxidoreductase B15 subunit)         | 129 | NDUFB4  | 0 | 3 | 0 | 0 | 21.7 | 0 |
| 1158 | 0.00 | 4.07  | 0.00 | P04040 | Catalase (EC 1.11.1.6)                                                                                                                    | 527 | CAT     | 0 | 3 | 0 | 0 | 7    | 0 |
| 1159 | 0.00 | 4.53  | 0.00 | P05089 | Arginase-1 (EC 3.5.3.1) (Liver-type arginase) (Type I arginase)                                                                           | 322 | ARG1    | 0 | 3 | 0 | 0 | 9.6  | 0 |
| 1160 | 0.00 | -0.09 | 0.00 | Q6GMV3 | Putative peptidyl-tRNA hydrolase PTRHD1 (EC 3.1.1.29) (Peptidyl-tRNA hydrolase domain-containing protein 1)                               | 140 | PTRHD1  | 0 | 3 | 0 | 0 | 21.4 | 0 |
| 1161 | 0.00 | 0.69  | 0.00 | Q7RTV0 | PHD finger-like domain-containing protein 5A (PHD finger-like domain protein 5A) (Splicing factor 3B-associated 14 kDa protein) (SF3b14b) | 110 | PHF5A   | 0 | 3 | 0 | 0 | 28.2 | 0 |

|      |      |      |      |        |                                                                                                                                                                                                                            |     |            |   |   |   |   |      |   |
|------|------|------|------|--------|----------------------------------------------------------------------------------------------------------------------------------------------------------------------------------------------------------------------------|-----|------------|---|---|---|---|------|---|
| 1162 | 0.00 | 0.87 | 0.00 | Q9Y2R0 | Cytochrome c oxidase assembly factor 3 homolog, mitochondrial (Coiled-coil domain-containing protein 56) (Mitochondrial translation regulation assembly intermediate of cytochrome c oxidase protein of 12 kDa)            | 106 | COA3       | 0 | 3 | 0 | 0 | 29.2 | 0 |
| 1163 | 0.00 | 0.98 | 0.00 | C9JQD4 | Peptidyl-prolyl cis-trans isomerase (EC 5.2.1.8) (Fragment)                                                                                                                                                                | 144 | PPIH       | 0 | 2 | 0 | 0 | 13.2 | 0 |
| 1164 | 0.00 | 0.20 | 0.00 | D6RAW0 | Ubiquitin-conjugating enzyme E2 D3 (Fragment)                                                                                                                                                                              | 72  | UBE2D3     | 0 | 2 | 0 | 0 | 23.6 | 0 |
| 1165 | 0.00 | 0.27 | 0.00 | E7EQV9 | Ribosomal protein L15 (Fragment)                                                                                                                                                                                           | 174 | RPL15      | 0 | 2 | 0 | 0 | 14.9 | 0 |
| 1166 | 0.00 | 0.15 | 0.00 | E7ERH2 | S-phase kinase-associated protein 1 (Fragment)                                                                                                                                                                             | 142 | SKP1       | 0 | 2 | 0 | 0 | 14.8 | 0 |
| 1167 | 0.00 | 1.63 | 0.00 | E9PPW7 | NADH dehydrogenase [ubiquinone] iron-sulfur protein 8, mitochondrial (Fragment)                                                                                                                                            | 184 | NDUFS8     | 0 | 2 | 0 | 0 | 16.3 | 0 |
| 1168 | 0.00 | 0.75 | 0.00 | F5H702 | 39S ribosomal protein L48, mitochondrial                                                                                                                                                                                   | 113 | MRPL48     | 0 | 2 | 0 | 0 | 21.2 | 0 |
| 1169 | 0.00 | 0.43 | 0.00 | H7C0A3 | Protein ARPC4-TTL3 (Fragment)                                                                                                                                                                                              | 167 | ARPC4-TTL3 | 0 | 2 | 0 | 0 | 11.4 | 0 |
| 1170 | 0.00 | 0.76 | 0.00 | H7C585 | Fratxin, mitochondrial (Fragment)                                                                                                                                                                                          | 108 | FXN        | 0 | 2 | 0 | 0 | 22.2 | 0 |
| 1171 | 0.00 | 1.05 | 0.00 | J3QL56 | Protein SCO1 homolog, mitochondrial                                                                                                                                                                                        | 270 | SCO1       | 0 | 2 | 0 | 0 | 10.4 | 0 |
| 1172 | 0.00 | 0.49 | 0.00 | O14907 | Tax1-binding protein 3 (Glutaminase-interacting protein 3) (Tax interaction protein 1) (TIP-1) (Tax-interacting protein 1)                                                                                                 | 124 | TAX1BP3    | 0 | 2 | 0 | 0 | 25   | 0 |
| 1173 | 0.00 | 1.19 | 0.00 | O14949 | Cytochrome b-c1 complex subunit 8 (Complex III subunit 8) (Complex III subunit VIII) (Ubiquinol-cytochrome c reductase complex 9.5 kDa protein) (Ubiquinol-cytochrome c reductase complex ubiquinone-binding protein QP-C) | 82  | UQCRQ      | 0 | 2 | 0 | 0 | 25.6 | 0 |



|      |      |      |      |        |                                                                                                                                                                     |     |         |   |   |   |   |      |   |
|------|------|------|------|--------|---------------------------------------------------------------------------------------------------------------------------------------------------------------------|-----|---------|---|---|---|---|------|---|
| 1174 | 0.00 | 1.27 | 0.00 | O43678 | NADH dehydrogenase [ubiquinone] 1 alpha subcomplex subunit 2 (Complex I-B8) (CI-B8) (NADH-ubiquinone oxidoreductase B8 subunit)                                     | 99  | NDUFA2  | 0 | 2 | 0 | 0 | 30.3 | 0 |
| 1175 | 0.00 | 1.04 | 0.00 | O60830 | Mitochondrial import inner membrane translocase subunit Tim17-B                                                                                                     | 172 | TIMM17B | 0 | 2 | 0 | 0 | 21.5 | 0 |
| 1176 | 0.00 | 0.53 | 0.00 | O75340 | Programmed cell death protein 6 (Apoptosis-linked gene 2 protein) (Probable calcium-binding protein ALG-2)                                                          | 191 | PDCD6   | 0 | 2 | 0 | 0 | 21.2 | 0 |
| 1177 | 0.00 | 1.25 | 0.00 | O95182 | NADH dehydrogenase [ubiquinone] 1 alpha subcomplex subunit 7 (Complex I-B14.5a) (CI-B14.5a) (NADH-ubiquinone oxidoreductase subunit B14.5a)                         | 113 | NDUFA7  | 0 | 2 | 0 | 0 | 23   | 0 |
| 1178 | 0.00 | 5.02 | 0.00 | P01040 | Cystatin-A (Cystatin-AS) (Stefin-A) [Cleaved into: Cystatin-A, N-terminally processed]                                                                              | 98  | CSTA    | 0 | 2 | 0 | 0 | 30.6 | 0 |
| 1179 | 0.00 | 2.08 | 0.00 | P10253 | Lysosomal alpha-glucosidase (EC 3.2.1.20) (Acid maltase) (Aglucosidase alfa) [Cleaved into: 76 kDa lysosomal alpha-glucosidase; 70 kDa lysosomal alpha-glucosidase] | 952 | GAA     | 0 | 2 | 0 | 0 | 4.5  | 0 |
| 1180 | 0.00 | 1.09 | 0.00 | P14927 | Cytochrome b-c1 complex subunit 7 (Complex III subunit 7) (Complex III subunit VII) (QP-C) (Ubiquinol-cytochrome c reductase complex 14 kDa protein)                | 111 | UQCRB   | 0 | 2 | 0 | 0 | 21.6 | 0 |
| 1181 | 0.00 | 1.07 | 0.00 | P21912 | Succinate dehydrogenase [ubiquinone] iron-sulfur subunit, mitochondrial (EC 1.3.5.1) (Iron-sulfur subunit of complex II) (Ip)                                       | 280 | SDHB    | 0 | 2 | 0 | 0 | 7.5  | 0 |
| 1182 | 0.00 | 0.68 | 0.00 | P26373 | 60S ribosomal protein L13 (Breast basic conserved protein 1)                                                                                                        | 211 | RPL13   | 0 | 2 | 0 | 0 | 14   | 0 |

|      |      |       |      |        |                                                                                                                                                                                                               |     |          |   |   |   |   |      |   |
|------|------|-------|------|--------|---------------------------------------------------------------------------------------------------------------------------------------------------------------------------------------------------------------|-----|----------|---|---|---|---|------|---|
| 1183 | 0.00 | 1.75  | 0.00 | P29508 | Serpin B3 (Protein T4-A) (Squamous cell carcinoma antigen 1) (SCCA-1)                                                                                                                                         | 390 | SERPINB3 | 0 | 2 | 0 | 0 | 5.9  | 0 |
| 1184 | 0.00 | 0.58  | 0.00 | P53999 | Activated RNA polymerase II transcriptional coactivator p15 (Positive cofactor 4) (PC4) (SUB1 homolog) (p14)                                                                                                  | 127 | SUB1     | 0 | 2 | 0 | 0 | 11   | 0 |
| 1185 | 0.00 | 0.10  | 0.00 | P55769 | NHP2-like protein 1 (High mobility group-like nuclear protein 2 homolog 1) (OTK27) (SNU13 homolog) (hSNU13) (U4/U6.U5 tri-snRNP 15.5 kDa protein) [Cleaved into: NHP2-like protein 1, N-terminally processed] | 128 | NHP2L1   | 0 | 2 | 0 | 0 | 18   | 0 |
| 1186 | 0.00 | 1.11  | 0.00 | P61769 | Beta-2-microglobulin [Cleaved into: Beta-2-microglobulin form pI 5.3]                                                                                                                                         | 119 | B2M      | 0 | 2 | 0 | 0 | 26.9 | 0 |
| 1187 | 0.00 | 1.04  | 0.00 | P62304 | Small nuclear ribonucleoprotein E (snRNP-E) (Sm protein E) (Sm-E) (SmE)                                                                                                                                       | 92  | SNRPE    | 0 | 2 | 0 | 0 | 25   | 0 |
| 1188 | 0.00 | -0.13 | 0.00 | P63167 | Dynein light chain 1, cytoplasmic (8 kDa dynein light chain) (DLC8) (Dynein light chain LC8-type 1) (Protein inhibitor of neuronal nitric oxide synthase) (PIN)                                               | 89  | DYNLL1   | 0 | 2 | 0 | 0 | 20.2 | 0 |
| 1189 | 0.00 | 0.81  | 0.00 | P63173 | 60S ribosomal protein L38                                                                                                                                                                                     | 70  | RPL38    | 0 | 2 | 0 | 0 | 28.6 | 0 |
| 1190 | 0.00 | 1.73  | 0.00 | P82664 | 28S ribosomal protein S10, mitochondrial (MRP-S10) (S10mt)                                                                                                                                                    | 201 | MRPS10   | 0 | 2 | 0 | 0 | 14.4 | 0 |
| 1191 | 0.00 | 0.74  | 0.00 | P82979 | SAP domain-containing ribonucleoprotein (Cytokine-induced protein of 29 kDa) (Nuclear protein Hcc-1) (Proliferation-associated cytokine-inducible protein CIP29)                                              | 210 | SARNP    | 0 | 2 | 0 | 0 | 9    | 0 |
| 1192 | 0.00 | -0.07 | 0.00 | Q13247 | Serine/arginine-rich splicing factor 6 (Pre-mRNA-splicing factor SRP55) (Splicing factor, arginine/serine-rich 6)                                                                                             | 344 | SRSF6    | 0 | 2 | 0 | 0 | 6.3  | 0 |

|      |      |      |      |        |                                                                                                                                                                                       |      |         |   |   |   |   |      |   |
|------|------|------|------|--------|---------------------------------------------------------------------------------------------------------------------------------------------------------------------------------------|------|---------|---|---|---|---|------|---|
| 1193 | 0.00 | 1.99 | 0.00 | Q15125 | 3-beta-hydroxysteroid-Delta(8),Delta(7)-isomerase (EC 5.3.3.5) (Cholestenol Delta-isomerase) (Delta(8)-Delta(7) sterol isomerase) (D8-D7 sterol isomerase) (Emopamil-binding protein) | 230  | EBP     | 0 | 2 | 0 | 0 | 12.2 | 0 |
| 1194 | 0.00 | 0.06 | 0.00 | Q3ZAQ7 | Vacuolar ATPase assembly integral membrane protein VMA21 (Myopathy with excessive autophagy protein)                                                                                  | 101  | VMA21   | 0 | 2 | 0 | 0 | 21.8 | 0 |
| 1195 | 0.00 | 1.30 | 0.00 | Q6P1X6 | UPF0598 protein C8orf82                                                                                                                                                               | 216  | C8orf82 | 0 | 2 | 0 | 0 | 13.5 | 0 |
| 1196 | 0.00 | 1.37 | 0.00 | Q7Z7K0 | COX assembly mitochondrial protein homolog (Cmc1p)                                                                                                                                    | 106  | CMC1    | 0 | 2 | 0 | 0 | 18.9 | 0 |
| 1197 | 0.00 | 0.17 | 0.00 | Q8N983 | 39S ribosomal protein L43, mitochondrial (L43mt) (MRP-L43) (Mitochondrial ribosomal protein bMRP36a)                                                                                  | 215  | MRPL43  | 0 | 2 | 0 | 0 | 12.6 | 0 |
| 1198 | 0.00 | 0.92 | 0.00 | Q8NI27 | THO complex subunit 2 (Tho2) (hTREX120)                                                                                                                                               | 1593 | THOC2   | 0 | 2 | 0 | 0 | 1.4  | 0 |
| 1199 | 0.00 | 0.21 | 0.00 | Q8WVC2 | 40S ribosomal protein S21                                                                                                                                                             | 81   | RPS21   | 0 | 2 | 0 | 0 | 35.8 | 0 |
| 1200 | 0.00 | 1.77 | 0.00 | Q9HB66 | Alternative protein MKKS (McKusick-Kaufman syndrome, isoform CRA_a) (McKusick-Kaufman/Bardet-Biedl syndromes putative chaperonin) (PNAS-117)                                          | 63   | MKKS    | 0 | 2 | 0 | 0 | 41.3 | 0 |
| 1201 | 0.00 | 0.69 | 0.00 | Q9NP97 | Dynein light chain roadblock-type 1 (Bithoraxoid-like protein) (BLP) (Dynein light chain 2A, cytoplasmic) (Dynein-associated protein Km23) (Roadblock domain-containing protein 1)    | 96   | DYNLRB1 | 0 | 2 | 0 | 0 | 25   | 0 |

|      |      |       |      |            |                                                                                                                                         |     |        |   |   |   |   |      |   |
|------|------|-------|------|------------|-----------------------------------------------------------------------------------------------------------------------------------------|-----|--------|---|---|---|---|------|---|
| 1202 | 0.00 | 0.86  | 0.00 | Q9Y333     | U6 snRNA-associated Sm-like protein LSm2 (Protein G7b) (Small nuclear ribonuclear protein D homolog) (snRNP core Sm-like protein Sm-x5) | 95  | LSM2   | 0 | 2 | 0 | 0 | 31.6 | 0 |
| 1203 | 0.00 | 1.06  | 0.00 | Q9Y3B7     | 39S ribosomal protein L11, mitochondrial (L11mt) (MRP-L11)                                                                              | 192 | MRPL11 | 0 | 2 | 0 | 0 | 17.5 | 0 |
| 1204 | 0.00 | 0.83  | 0.00 | Q9Y3D6     | Mitochondrial fission 1 protein (FIS1 homolog) (hFis1) (Tetratricopeptide repeat protein 11) (TPR repeat protein 11)                    | 152 | FIS1   | 0 | 2 | 0 | 0 | 15.8 | 0 |
| 1205 | 0.00 | 0.35  | 0.00 | Q9Y5J7     | Mitochondrial import inner membrane translocase subunit Tim9                                                                            | 89  | TIMM9  | 0 | 2 | 0 | 0 | 29.2 | 0 |
| 1206 | 0.00 | 2.12  | 0.00 | A0A087WUD3 | Oligosaccharyltransferase complex subunit OSTC                                                                                          | 83  | OSTC   | 0 | 1 | 0 | 0 | 14.5 | 0 |
| 1207 | 0.00 | 2.31  | 0.00 | A0A087WVT9 | Nucleoside diphosphate kinase (EC 2.7.4.6)                                                                                              | 153 | NME4   | 0 | 1 | 0 | 0 | 7.8  | 0 |
| 1208 | 0.00 | 0.22  | 0.00 | A0A087WY88 | Protein jagunal homolog 1                                                                                                               | 181 | JAGN1  | 0 | 1 | 0 | 0 | 6.6  | 0 |
| 1209 | 0.00 | 6.49  | 0.00 | A0A087WYF5 | Salivary acidic proline-rich phosphoprotein 1/2 (Fragment)                                                                              | 140 | PRH1   | 0 | 1 | 0 | 0 | 12.1 | 0 |
| 1210 | 0.00 | -0.20 | 0.00 | B5MC59     | Replication protein A 14 kDa subunit (Replication protein A3, 14kDa, isoform CRA_a)                                                     | 82  | RPA3   | 0 | 1 | 0 | 0 | 14.6 | 0 |
| 1211 | 0.00 | 1.43  | 0.00 | B8ZZV5     | 39S ribosomal protein L30, mitochondrial                                                                                                | 101 | MRPL30 | 0 | 1 | 0 | 0 | 10.9 | 0 |
| 1212 | 0.00 | 0.32  | 0.00 | C9IZG4     | Protein CutA                                                                                                                            | 135 | CUTA   | 0 | 1 | 0 | 0 | 13.3 | 0 |
| 1213 | 0.00 | 1.97  | 0.00 | C9JAW5     | HIG1 domain family member 1A, mitochondrial                                                                                             | 83  | HIGD1A | 0 | 1 | 0 | 0 | 21.7 | 0 |
| 1214 | 0.00 | 2.68  | 0.00 | C9JEV0     | Zinc-alpha-2-glycoprotein                                                                                                               | 227 | AZGP1  | 0 | 1 | 0 | 0 | 5.3  | 0 |
| 1215 | 0.00 | 0.99  | 0.00 | C9JKQ2     | NADH dehydrogenase [ubiquinone] 1 beta subcomplex subunit 3 (Fragment)                                                                  | 65  | NDUFB3 | 0 | 1 | 0 | 0 | 16.9 | 0 |

|      |      |       |      |        |                                                                                        |     |          |   |   |   |   |      |   |
|------|------|-------|------|--------|----------------------------------------------------------------------------------------|-----|----------|---|---|---|---|------|---|
| 1216 | 0.00 | 0.18  | 0.00 | C9JL85 | Myotrophin                                                                             | 52  | MTPN     | 0 | 1 | 0 | 0 | 32.7 | 0 |
| 1217 | 0.00 | 0.90  | 0.00 | C9JY28 | LYR motif-containing protein 4                                                         | 70  | LYRM4    | 0 | 1 | 0 | 0 | 20   | 0 |
| 1218 | 0.00 | 0.38  | 0.00 | C9JYN0 | Synaptophysin-like protein 1                                                           | 224 | SYPL1    | 0 | 1 | 0 | 0 | 4.9  | 0 |
| 1219 | 0.00 | 5.73  | 0.00 | D3DRR9 | Chromosome 10 open reading frame 47, isoform CRA_b (Proline and serine-rich protein 2) | 239 | C10orf47 | 0 | 1 | 0 | 0 | 5.4  | 0 |
| 1220 | 0.00 | 1.32  | 0.00 | D6R9Z7 | Cytochrome c oxidase subunit 7C, mitochondrial                                         | 56  | COX7C    | 0 | 1 | 0 | 0 | 16.1 | 0 |
| 1221 | 0.00 | 1.32  | 0.00 | E5RGY0 | Derlin-1                                                                               | 151 | DERL1    | 0 | 1 | 0 | 0 | 7.3  | 0 |
| 1222 | 0.00 | 2.21  | 0.00 | E7EWF7 | Uncharacterized protein (Fragment)                                                     | 191 |          | 0 | 1 | 0 | 0 | 13.1 | 0 |
| 1223 | 0.00 | 2.20  | 0.00 | E9PKY5 | Peptidyl-prolyl cis-trans isomerase (EC 5.2.1.8) (Fragment)                            | 213 | PPIE     | 0 | 1 | 0 | 0 | 4.2  | 0 |
| 1224 | 0.00 | -0.04 | 0.00 | E9PNW4 | CD59 glycoprotein                                                                      | 108 | CD59     | 0 | 1 | 0 | 0 | 7.4  | 0 |
| 1225 | 0.00 | -0.58 | 0.00 | E9PPQ4 | Ferritin (Fragment)                                                                    | 58  | FTH1     | 0 | 1 | 0 | 0 | 12.1 | 0 |
| 1226 | 0.00 | 1.45  | 0.00 | F5H169 | 26S proteasome non-ATPase regulatory subunit 9                                         | 128 | PSMD9    | 0 | 1 | 0 | 0 | 9.4  | 0 |
| 1227 | 0.00 | -0.11 | 0.00 | F5H1S8 | Malectin (Fragment)                                                                    | 146 | MLEC     | 0 | 1 | 0 | 0 | 8.2  | 0 |
| 1228 | 0.00 | 1.60  | 0.00 | F6WST4 | ORM1-like protein 1 (Fragment)                                                         | 108 | ORMDL1   | 0 | 1 | 0 | 0 | 13.9 | 0 |
| 1229 | 0.00 | 0.17  | 0.00 | F8VSA6 | NEDD8                                                                                  | 50  | NEDD8    | 0 | 1 | 0 | 0 | 22   | 0 |
| 1230 | 0.00 | 2.57  | 0.00 | F8VV32 | Lysozyme (EC 3.2.1.17)                                                                 | 104 | LYZ      | 0 | 1 | 0 | 0 | 11.5 | 0 |
| 1231 | 0.00 | 0.85  | 0.00 | F8WEX5 | Sulfatase-modifying factor 2                                                           | 165 | SUMF2    | 0 | 1 | 0 | 0 | 6.1  | 0 |
| 1232 | 0.00 | 4.84  | 0.00 | G8JLG2 | Corneodesmosin                                                                         | 529 | CDSN     | 0 | 1 | 0 | 0 | 3.4  | 0 |
| 1233 | 0.00 | -0.45 | 0.00 | G8JLQ3 | Biogenesis of lysosome-related organelles complex 1 subunit 1                          | 75  | BLOC1S1  | 0 | 1 | 0 | 0 | 14.7 | 0 |
| 1234 | 0.00 | 0.69  | 0.00 | H0Y993 | Protein DEK (Fragment)                                                                 | 156 | DEK      | 0 | 1 | 0 | 0 | 8.3  | 0 |
| 1235 | 0.00 | 1.42  | 0.00 | H0YDP7 | 39S ribosomal protein L49, mitochondrial (Fragment)                                    | 127 | MRPL49   | 0 | 1 | 0 | 0 | 11   | 0 |

|      |      |           |      |        |                                                                              |     |         |   |   |   |   |      |   |
|------|------|-----------|------|--------|------------------------------------------------------------------------------|-----|---------|---|---|---|---|------|---|
| 1236 | 0.00 | -<br>0.02 | 0.00 | H0YER1 | Remodeling and spacing factor 1 (Fragment)                                   | 702 | RSF1    | 0 | 1 | 0 | 0 | 1.7  | 0 |
| 1237 | 0.00 | 1.58      | 0.00 | H0YF90 | Cation-dependent mannose-6-phosphate receptor (Fragment)                     | 148 | M6PR    | 0 | 1 | 0 | 0 | 18.2 | 0 |
| 1238 | 0.00 | 0.82      | 0.00 | H3BSA6 | dCTP pyrophosphatase 1                                                       | 71  | DCTPP1  | 0 | 1 | 0 | 0 | 14.1 | 0 |
| 1239 | 0.00 | -<br>0.12 | 0.00 | H7BY91 | 60S ribosomal protein L36a                                                   | 70  | RPL36A  | 0 | 1 | 0 | 0 | 14.3 | 0 |
| 1240 | 0.00 | 1.56      | 0.00 | J3KS15 | Peptidyl-tRNA hydrolase ICT1, mitochondrial (Fragment)                       | 192 | ICT1    | 0 | 1 | 0 | 0 | 7.3  | 0 |
| 1241 | 0.00 | 0.74      | 0.00 | J3KTI5 | Receptor tyrosine-protein kinase erbB-2 (Fragment)                           | 251 | ERBB2   | 0 | 1 | 0 | 0 | 4.8  | 0 |
| 1242 | 0.00 | -<br>9.65 | 0.00 | J3KTP2 | WD repeat-containing protein WRAP73 (Fragment)                               | 200 | WRAP73  | 0 | 1 | 0 | 0 | 4.5  | 0 |
| 1243 | 0.00 | -<br>0.19 | 0.00 | J3QR72 | Bromodomain-containing protein 2                                             | 162 | BRD2    | 0 | 1 | 0 | 0 | 8    | 0 |
| 1244 | 0.00 | -<br>0.97 | 0.00 | K4DIB9 | Cysteine-rich protein 1 (Fragment)                                           | 46  | CRIP1   | 0 | 1 | 0 | 0 | 19.6 | 0 |
| 1245 | 0.00 | -<br>0.04 | 0.00 | K7EM09 | Transmembrane protein 205 (Fragment)                                         | 120 | TMEM205 | 0 | 1 | 0 | 0 | 10.8 | 0 |
| 1246 | 0.00 | -<br>0.07 | 0.00 | K7ENF1 | Peroxisomal acyl-coenzyme A oxidase 1 (Fragment)                             | 132 | ACOX1   | 0 | 1 | 0 | 0 | 10.6 | 0 |
| 1247 | 0.00 | 1.70      | 0.00 | K7EQ77 | NADH dehydrogenase [ubiquinone] 1 alpha subcomplex subunit 11                | 120 | NDUFA11 | 0 | 1 | 0 | 0 | 19.2 | 0 |
| 1248 | 0.00 | 2.27      | 0.00 | K7EQQ1 | Cleft lip and palate transmembrane protein 1 (Fragment)                      | 171 | CLPTM1  | 0 | 1 | 0 | 0 | 8.8  | 0 |
| 1249 | 0.00 | 0.81      | 0.00 | L0R6Q1 | Alternative protein SLC35A4 (Probable UDP-sugar transporter protein SLC35A4) | 103 | SLC35A4 | 0 | 1 | 0 | 0 | 7.8  | 0 |
| 1250 | 0.00 | 0.29      | 0.00 | M0QXH0 | Thioredoxin, mitochondrial                                                   | 64  | TXN2    | 0 | 1 | 0 | 0 | 23.4 | 0 |
| 1251 | 0.00 | -<br>2.71 | 0.00 | M0R050 | Exosome complex component RRP46                                              | 197 | EXOSC5  | 0 | 1 | 0 | 0 | 6.1  | 0 |

|      |      |        |      |        |                                                                                                                                                               |     |          |   |   |   |   |      |   |
|------|------|--------|------|--------|---------------------------------------------------------------------------------------------------------------------------------------------------------------|-----|----------|---|---|---|---|------|---|
| 1252 | 0.00 | 0.52   | 0.00 | M0R203 | Heterogeneous nuclear ribonucleoprotein U-like protein 1 (Fragment)                                                                                           | 81  | HNRNPUL1 | 0 | 1 | 0 | 0 | 13.6 | 0 |
| 1253 | 0.00 | 0.08   | 0.00 | O15155 | BET1 homolog (hBET1) (Golgi vesicular membrane-trafficking protein p18)                                                                                       | 118 | BET1     | 0 | 1 | 0 | 0 | 13.3 | 0 |
| 1254 | 0.00 | 1.39   | 0.00 | O43402 | ER membrane protein complex subunit 8 (Neighbor of COX4) (Protein FAM158B)                                                                                    | 210 | EMC8     | 0 | 1 | 0 | 0 | 5.7  | 0 |
| 1255 | 0.00 | - 0.58 | 0.00 | O43598 | 2'-deoxynucleoside 5'-phosphate N-hydrolase 1 (EC 3.2.2.-) (c-Myc-responsive protein RCL)                                                                     | 174 | DNPH1    | 0 | 1 | 0 | 0 | 11.5 | 0 |
| 1256 | 0.00 | - 0.30 | 0.00 | O60763 | General vesicular transport factor p115 (Protein USO1 homolog) (Transcytosis-associated protein) (TAP) (Vesicle-docking protein)                              | 962 | USO1     | 0 | 1 | 0 | 0 | 1.2  | 0 |
| 1257 | 0.00 | 1.42   | 0.00 | O60783 | 28S ribosomal protein S14, mitochondrial (MRP-S14) (S14mt)                                                                                                    | 128 | MRPS14   | 0 | 1 | 0 | 0 | 11.7 | 0 |
| 1258 | 0.00 | 1.02   | 0.00 | O75380 | NADH dehydrogenase [ubiquinone] iron-sulfur protein 6, mitochondrial (Complex I-13kD-A) (CI-13kD-A) (NADH-ubiquinone oxidoreductase 13 kDa-A subunit)         | 124 | NDUFS6   | 0 | 1 | 0 | 0 | 12.1 | 0 |
| 1259 | 0.00 | - 0.23 | 0.00 | O75531 | Barrier-to-autointegration factor (Breakpoint cluster region protein 1) [Cleaved into: Barrier-to-autointegration factor, N-terminally processed]             | 89  | BANF1    | 0 | 1 | 0 | 0 | 13.5 | 0 |
| 1260 | 0.00 | 0.75   | 0.00 | O75934 | Pre-mRNA-splicing factor SPF27 (Breast carcinoma-amplified sequence 2) (DNA amplified in mammary carcinoma 1 protein) (Spliceosome-associated protein SPF 27) | 225 | BCAS2    | 0 | 1 | 0 | 0 | 5.8  | 0 |

|      |      |      |      |        |                                                                                                                                                                            |      |         |   |   |   |   |      |   |
|------|------|------|------|--------|----------------------------------------------------------------------------------------------------------------------------------------------------------------------------|------|---------|---|---|---|---|------|---|
| 1261 | 0.00 | 1.57 | 0.00 | O95298 | NADH dehydrogenase [ubiquinone] 1 subunit C2 (Complex I-B14.5b) (CI-B14.5b) (Human lung cancer oncogene 1 protein) (HLC-1) (NADH-ubiquinone oxidoreductase subunit B14.5b) | 119  | NDUFC2  | 0 | 1 | 0 | 0 | 12.5 | 0 |
| 1262 | 0.00 | 0.50 | 0.00 | O95969 | Secretoglobin family 1D member 2 (Lipophilin-B)                                                                                                                            | 90   | SCGB1D2 | 0 | 1 | 0 | 0 | 10   | 0 |
| 1263 | 0.00 | 0.41 | 0.00 | P00846 | ATP synthase subunit a (F-ATPase protein 6)                                                                                                                                | 226  | MT-ATP6 | 0 | 1 | 0 | 0 | 4.4  | 0 |
| 1264 | 0.00 | 2.42 | 0.00 | P03928 | ATP synthase protein 8 (A6L) (F-ATPase subunit 8)                                                                                                                          | 68   | MT-ATP8 | 0 | 1 | 0 | 0 | 13.2 | 0 |
| 1265 | 0.00 | 1.75 | 0.00 | P05386 | 60S acidic ribosomal protein P1                                                                                                                                            | 114  | RPLP1   | 0 | 1 | 0 | 0 | 14   | 0 |
| 1266 | 0.00 | 0.31 | 0.00 | P07311 | Acylphosphatase-1 (EC 3.6.1.7) (Acylphosphatase, erythrocyte isozyme) (Acylphosphatase, organ-common type isozyme) (Acylphosphate phosphohydrolase 1)                      | 99   | ACYP1   | 0 | 1 | 0 | 0 | 13.1 | 0 |
| 1267 | 0.00 | 1.10 | 0.00 | P09234 | U1 small nuclear ribonucleoprotein C (U1 snRNP C) (U1-C) (U1C)                                                                                                             | 159  | SNRPC   | 0 | 1 | 0 | 0 | 11.3 | 0 |
| 1268 | 0.00 | 1.70 | 0.00 | P10301 | Ras-related protein R-Ras (p23)                                                                                                                                            | 218  | RRAS    | 0 | 1 | 0 | 0 | 5    | 0 |
| 1269 | 0.00 | 7.51 | 0.00 | P11532 | Dystrophin                                                                                                                                                                 | 3685 | DMD     | 0 | 1 | 0 | 0 | 0.5  | 0 |
| 1270 | 0.00 | 1.11 | 0.00 | P14406 | Cytochrome c oxidase subunit 7A2, mitochondrial (Cytochrome c oxidase subunit VIIa-liver/heart) (Cytochrome c oxidase subunit VIIa-L) (Cytochrome c oxidase subunit VIIaL) | 83   | COX7A2  | 0 | 1 | 0 | 0 | 15.7 | 0 |
| 1271 | 0.00 | 1.26 | 0.00 | P14854 | Cytochrome c oxidase subunit 6B1 (Cytochrome c oxidase subunit VIb isoform 1) (COX VIb-1)                                                                                  | 86   | COX6B1  | 0 | 1 | 0 | 0 | 20.9 | 0 |



|      |      |       |      |        |                                                                                                                                                                                                                                                                                                          |     |          |   |   |   |   |      |   |
|------|------|-------|------|--------|----------------------------------------------------------------------------------------------------------------------------------------------------------------------------------------------------------------------------------------------------------------------------------------------------------|-----|----------|---|---|---|---|------|---|
| 1272 | 0.00 | -0.09 | 0.00 | P25815 | Protein S100-P (Migration-inducing gene 9 protein) (MIG9) (Protein S100-E) (S100 calcium-binding protein P)                                                                                                                                                                                              | 95  | S100P    | 0 | 1 | 0 | 0 | 13.7 | 0 |
| 1273 | 0.00 | 0.70  | 0.00 | P28288 | ATP-binding cassette sub-family D member 3 (70 kDa peroxisomal membrane protein) (PMP70)                                                                                                                                                                                                                 | 659 | ABCD3    | 0 | 1 | 0 | 0 | 2.2  | 0 |
| 1274 | 0.00 | 0.13  | 0.00 | P36543 | V-type proton ATPase subunit E 1 (V-ATPase subunit E 1) (V-ATPase 31 kDa subunit) (p31) (Vacuolar proton pump subunit E 1)                                                                                                                                                                               | 226 | ATP6V1E1 | 0 | 1 | 0 | 0 | 5.1  | 0 |
| 1275 | 0.00 | 4.09  | 0.00 | P47929 | Galectin-7 (Gal-7) (HKL-14) (PI7) (p53-induced gene 1 protein)                                                                                                                                                                                                                                           | 136 | LGALS7   | 0 | 1 | 0 | 0 | 8.1  | 0 |
| 1276 | 0.00 | 0.79  | 0.00 | P51151 | Ras-related protein Rab-9A                                                                                                                                                                                                                                                                               | 201 | RAB9A    | 0 | 1 | 0 | 0 | 7    | 0 |
| 1277 | 0.00 | 0.43  | 0.00 | P56385 | ATP synthase subunit e, mitochondrial (ATPase subunit e)                                                                                                                                                                                                                                                 | 69  | ATP5I    | 0 | 1 | 0 | 0 | 14.5 | 0 |
| 1278 | 0.00 | -0.15 | 0.00 | P61254 | 60S ribosomal protein L26                                                                                                                                                                                                                                                                                | 145 | RPL26    | 0 | 1 | 0 | 0 | 5.5  | 0 |
| 1279 | 0.00 | 0.43  | 0.00 | P61457 | Pterin-4-alpha-carbinolamine dehydratase (PHS) (EC 4.2.1.96) (4-alpha-hydroxy-tetrahydropterin dehydratase) (Dimerization cofactor of hepatocyte nuclear factor 1-alpha) (DCoH) (Dimerization cofactor of HNF1) (Phenylalanine hydroxylase-stimulating protein) (Pterin carbinolamine dehydratase) (PCD) | 104 | PCBD1    | 0 | 1 | 0 | 0 | 12.5 | 0 |
| 1280 | 0.00 | 2.05  | 0.00 | P62306 | Small nuclear ribonucleoprotein F (snRNP-F) (Sm protein F) (Sm-F) (SmF)                                                                                                                                                                                                                                  | 86  | SNRPF    | 0 | 1 | 0 | 0 | 8.1  | 0 |
| 1281 | 0.00 | 0.05  | 0.00 | P62312 | U6 snRNA-associated Sm-like protein LSM6                                                                                                                                                                                                                                                                 | 80  | LSM6     | 0 | 1 | 0 | 0 | 13.8 | 0 |
| 1282 | 0.00 | 0.40  | 0.00 | P63218 | Guanine nucleotide-binding protein G(I)/G(S)/G(O) subunit gamma-5                                                                                                                                                                                                                                        | 68  | GNG5     | 0 | 1 | 0 | 0 | 13.2 | 0 |

|      |      |      |      |        |                                                                                                                                                                                                                                                                                                        |      |         |   |   |   |   |      |   |
|------|------|------|------|--------|--------------------------------------------------------------------------------------------------------------------------------------------------------------------------------------------------------------------------------------------------------------------------------------------------------|------|---------|---|---|---|---|------|---|
| 1283 | 0.00 | 2.08 | 0.00 | P80723 | Brain acid soluble protein 1 (22 kDa neuronal tissue-enriched acidic protein) (Neuronal axonal membrane protein NAP-22)                                                                                                                                                                                | 227  | BASP1   | 0 | 1 | 0 | 0 | 6.2  | 0 |
| 1284 | 0.00 | 4.91 | 0.00 | Q08188 | Protein-glutamine gamma-glutamyltransferase E (EC 2.3.2.13) (Transglutaminase E) (TG(E)) (TGE) (TGase E) (Transglutaminase-3) (TGase-3) [Cleaved into: Protein-glutamine gamma-glutamyltransferase E 50 kDa catalytic chain; Protein-glutamine gamma-glutamyltransferase E 27 kDa non-catalytic chain] | 693  | TGM3    | 0 | 1 | 0 | 0 | 1.3  | 0 |
| 1285 | 0.00 | 5.57 | 0.00 | Q12873 | Chromodomain-helicase-DNA-binding protein 3 (CHD-3) (EC 3.6.4.12) (ATP-dependent helicase CHD3) (Mi-2 autoantigen 240 kDa protein) (Mi2-alpha) (Zinc finger helicase) (hZFH)                                                                                                                           | 2000 | CHD3    | 0 | 1 | 0 | 0 | 0.5  | 0 |
| 1286 | 0.00 | 0.01 | 0.00 | Q14061 | Cytochrome c oxidase copper chaperone                                                                                                                                                                                                                                                                  | 63   | COX17   | 0 | 1 | 0 | 0 | 25.4 | 0 |
| 1287 | 0.00 | 1.22 | 0.00 | Q16864 | V-type proton ATPase subunit F (V-ATPase subunit F) (V-ATPase 14 kDa subunit) (Vacuolar proton pump subunit F)                                                                                                                                                                                         | 119  | ATP6V1F | 0 | 1 | 0 | 0 | 16   | 0 |
| 1288 | 0.00 | 0.51 | 0.00 | Q5HYK3 | 2-methoxy-6-polyprenyl-1,4-benzoquinol methylase, mitochondrial (EC 2.1.1.201) (Ubiquinone biosynthesis methyltransferase COQ5)                                                                                                                                                                        | 327  | COQ5    | 0 | 1 | 0 | 0 | 4.1  | 0 |
| 1289 | 0.00 | 1.02 | 0.00 | Q5JTJ3 | Cytochrome c oxidase assembly factor 6 homolog                                                                                                                                                                                                                                                         | 125  | COA6    | 0 | 1 | 0 | 0 | 17.7 | 0 |
| 1290 | 0.00 | 0.64 | 0.00 | Q5QPM9 | Proteasome inhibitor PI31 subunit (Fragment)                                                                                                                                                                                                                                                           | 183  | PSMF1   | 0 | 1 | 0 | 0 | 9.3  | 0 |

|      |      |       |      |        |                                                                                                                                                                                                             |     |          |   |   |   |   |      |   |
|------|------|-------|------|--------|-------------------------------------------------------------------------------------------------------------------------------------------------------------------------------------------------------------|-----|----------|---|---|---|---|------|---|
| 1291 | 0.00 | 1.51  | 0.00 | Q5RI15 | Cytochrome c oxidase protein 20 homolog                                                                                                                                                                     | 118 | COX20    | 0 | 1 | 0 | 0 | 11.9 | 0 |
| 1292 | 0.00 | 1.91  | 0.00 | Q5RKV6 | Exosome complex component MTR3 (Exosome component 6) (mRNA transport regulator 3 homolog) (hMtr3) (p11)                                                                                                     | 272 | EXOSC6   | 0 | 1 | 0 | 0 | 5.9  | 0 |
| 1293 | 0.00 | -1.33 | 0.00 | Q5SXM8 | DNL-type zinc finger protein (Hsp70-escort protein 1) (HEP1) (mtHsp70-escort protein)                                                                                                                       | 178 | DNLZ     | 0 | 1 | 0 | 0 | 5.1  | 0 |
| 1294 | 0.00 | 0.34  | 0.00 | Q5T123 | SH3 domain-binding glutamic acid-rich-like protein 3                                                                                                                                                        | 88  | SH3BGRL3 | 0 | 1 | 0 | 0 | 17   | 0 |
| 1295 | 0.00 | 0.38  | 0.00 | Q5TGZ0 | MICOS complex subunit MIC10 (Mitochondrial inner membrane organizing system protein 1)                                                                                                                      | 78  | MINOS1   | 0 | 1 | 0 | 0 | 33.3 | 0 |
| 1296 | 0.00 | 5.34  | 0.00 | Q5VTQ0 | Tetratricopeptide repeat protein 39B (TPR repeat protein 39B)                                                                                                                                               | 682 | TTC39B   | 0 | 1 | 0 | 0 | 6    | 0 |
| 1297 | 0.00 | 0.56  | 0.00 | Q5VU10 | Ribonuclease P protein subunit p30 (Fragment)                                                                                                                                                               | 212 | RPP30    | 0 | 1 | 0 | 0 | 4.7  | 0 |
| 1298 | 0.00 | 6.60  | 0.00 | Q5VXJ5 | Synaptonemal complex protein 1 (Fragment)                                                                                                                                                                   | 792 | SYCP1    | 0 | 1 | 0 | 0 | 1.6  | 0 |
| 1299 | 0.00 | 0.62  | 0.00 | Q6IAK0 | SELT protein (Selenoprotein T) (cDNA FLJ90525 fis, clone NT2RP4001001, highly similar to Selenoprotein T)                                                                                                   | 137 | SELT     | 0 | 1 | 0 | 0 | 9.5  | 0 |
| 1300 | 0.00 | 3.80  | 0.00 | Q6UWP8 | Suprabasin                                                                                                                                                                                                  | 590 | SBSN     | 0 | 1 | 0 | 0 | 9.2  | 0 |
| 1301 | 0.00 | 0.27  | 0.00 | Q7Z5G4 | acety                                                                                                                                                                                                       | 137 | GOLGA7   | 0 | 1 | 0 | 0 | 8.2  | 0 |
| 1302 | 0.00 | -0.15 | 0.00 | Q7Z7H5 | Transmembrane emp24 domain-containing protein 4 (Endoplasmic reticulum stress-response protein 25) (ERS25) (GMP25iso) (Putative NF-kappa-B-activating protein 156) (p24 family protein alpha-3) (p24alpha3) | 227 | TMED4    | 0 | 1 | 0 | 0 | 5.9  | 0 |

|      |      |       |      |        |                                                                                                                                                  |     |         |   |   |   |   |      |   |
|------|------|-------|------|--------|--------------------------------------------------------------------------------------------------------------------------------------------------|-----|---------|---|---|---|---|------|---|
| 1303 | 0.00 | 2.08  | 0.00 | Q7Z7H8 | 39S ribosomal protein L10, mitochondrial (L10mt) (MRP-L10) (39S ribosomal protein L8, mitochondrial) (L8mt) (MRP-L8)                             | 261 | MRPL10  | 0 | 1 | 0 | 0 | 7.3  | 0 |
| 1304 | 0.00 | 0.81  | 0.00 | Q86YN1 | Dolichyldiphosphatase 1 (EC 3.6.1.43) (Dolichyl pyrophosphate phosphatase 1)                                                                     | 238 | DOLPP1  | 0 | 1 | 0 | 0 | 5.5  | 0 |
| 1305 | 0.00 | 1.46  | 0.00 | Q8N4V1 | Membrane magnesium transporter 1 (ER membrane protein complex subunit 5) (Transmembrane protein 32)                                              | 131 | MMGT1   | 0 | 1 | 0 | 0 | 18.3 | 0 |
| 1306 | 0.00 | -0.32 | 0.00 | Q8WVF3 | RAB28 protein (Ras-related protein Rab-28)                                                                                                       | 95  | RAB28   | 0 | 1 | 0 | 0 | 11.6 | 0 |
| 1307 | 0.00 | 1.53  | 0.00 | Q8WW12 | PEST proteolytic signal-containing nuclear protein (PCNP) (PEST-containing nuclear protein)                                                      | 178 | PCNP    | 0 | 1 | 0 | 0 | 11.5 | 0 |
| 1308 | 0.00 | 3.57  | 0.00 | Q8WY22 | BRI3-binding protein (I3-binding protein) (Cervical cancer 1 proto-oncogene-binding protein KG19) (HCCRBP-1)                                     | 251 | BRI3BP  | 0 | 1 | 0 | 0 | 6.8  | 0 |
| 1309 | 0.00 | -0.98 | 0.00 | Q969X5 | Endoplasmic reticulum-Golgi intermediate compartment protein 1 (ER-Golgi intermediate compartment 32 kDa protein) (ERGIC-32)                     | 290 | ERGIC1  | 0 | 1 | 0 | 0 | 5.1  | 0 |
| 1310 | 0.00 | 1.22  | 0.00 | Q96DA6 | Mitochondrial import inner membrane translocase subunit TIM14 (DnaJ homolog subfamily C member 19)                                               | 116 | DNAJC19 | 0 | 1 | 0 | 0 | 15.4 | 0 |
| 1311 | 0.00 | 0.55  | 0.00 | Q96EL3 | 39S ribosomal protein L53, mitochondrial (L53mt) (MRP-L53)                                                                                       | 112 | MRPL53  | 0 | 1 | 0 | 0 | 8.9  | 0 |
| 1312 | 0.00 | 1.01  | 0.00 | Q96EX1 | Small integral membrane protein 12                                                                                                               | 92  | SMIM12  | 0 | 1 | 0 | 0 | 9.8  | 0 |
| 1313 | 0.00 | 1.63  | 0.00 | Q96IX5 | Up-regulated during skeletal muscle growth protein 5 (Diabetes-associated protein in insulin-sensitive tissues) (HCV F-transactivated protein 2) | 58  | USMG5   | 0 | 1 | 0 | 0 | 25.9 | 0 |

|      |      |       |      |        |                                                                                                                                                                                               |     |         |   |   |   |   |      |   |
|------|------|-------|------|--------|-----------------------------------------------------------------------------------------------------------------------------------------------------------------------------------------------|-----|---------|---|---|---|---|------|---|
| 1314 | 0.00 | 1.11  | 0.00 | Q96PD2 | Discoidin, CUB and LCCL domain-containing protein 2 (CUB, LCCL and coagulation factor V/VIII-homology domains protein 1) (Endothelial and smooth muscle cell-derived neuropilin-like protein) | 775 | DCBLD2  | 0 | 1 | 0 | 0 | 1.3  | 0 |
| 1315 | 0.00 | 5.08  | 0.00 | Q99595 | Mitochondrial import inner membrane translocase subunit Tim17-A (Inner membrane preprotein translocase Tim17a)                                                                                | 171 | TIMM17A | 0 | 1 | 0 | 0 | 19.3 | 0 |
| 1316 | 0.00 | 0.31  | 0.00 | Q9BQC6 | Ribosomal protein 63, mitochondrial (hMRP63) (Mitochondrial ribosomal protein 63) (Mitochondrial ribosomal protein L57)                                                                       | 102 | MRPL57  | 0 | 1 | 0 | 0 | 12.7 | 0 |
| 1317 | 0.00 | -0.29 | 0.00 | Q9BRF8 | Serine/threonine-protein phosphatase CPPED1 (EC 3.1.3.16) (Calcineurin-like phosphoesterase domain-containing protein 1) (Complete S-transactivated protein 1)                                | 314 | CPPED1  | 0 | 1 | 0 | 0 | 9    | 0 |
| 1318 | 0.00 | 0.45  | 0.00 | Q9BWI5 | Splicing factor 3B subunit 5 (SF3b5) (Pre-mRNA-splicing factor SF3b 10 kDa subunit)                                                                                                           | 86  | SF3B5   | 0 | 1 | 0 | 0 | 12.8 | 0 |
| 1319 | 0.00 | 3.54  | 0.00 | Q9BXW7 | Cat eye syndrome critical region protein 5                                                                                                                                                    | 423 | CECR5   | 0 | 1 | 0 | 0 | 3.6  | 0 |
| 1320 | 0.00 | 0.55  | 0.00 | Q9BZG1 | Ras-related protein Rab-34 (Ras-related protein Rab-39) (Ras-related protein Rah)                                                                                                             | 259 | RAB34   | 0 | 1 | 0 | 0 | 5.9  | 0 |
| 1321 | 0.00 | -0.16 | 0.00 | Q9H3Z4 | DnaJ homolog subfamily C member 5 (Cysteine string protein) (CSP)                                                                                                                             | 198 | DNAJC5  | 0 | 1 | 0 | 0 | 8.4  | 0 |
| 1322 | 0.00 | 6.18  | 0.00 | Q9H7L9 | Sin3 histone deacetylase corepressor complex component SDS3 (45 kDa Sin3-associated polypeptide) (Suppressor of defective silencing 3 protein homolog)                                        | 328 | SUDS3   | 0 | 1 | 0 | 0 | 5.8  | 0 |

|      |      |       |      |        |                                                                                                                                                                                     |     |        |   |   |   |   |     |   |
|------|------|-------|------|--------|-------------------------------------------------------------------------------------------------------------------------------------------------------------------------------------|-----|--------|---|---|---|---|-----|---|
| 1323 | 0.00 | 1.60  | 0.00 | Q9HD45 | Transmembrane 9 superfamily member 3 (EP70-P-iso) (SM-11044-binding protein)                                                                                                        | 589 | TM9SF3 | 0 | 1 | 0 | 0 | 1.9 | 0 |
| 1324 | 0.00 | 0.70  | 0.00 | Q9NQ50 | 39S ribosomal protein L40, mitochondrial (L40mt) (MRP-L40) (Nuclear localization signal-containing protein deleted in velocardiofacial syndrome) (Up-regulated in metastasis)       | 206 | MRPL40 | 0 | 1 | 0 | 0 | 4.4 | 0 |
| 1325 | 0.00 | 1.13  | 0.00 | Q9NTX5 | Ethylmalonyl-CoA decarboxylase (EC 4.1.1.94) (Enoyl-CoA hydratase domain-containing protein 1) (Methylmalonyl-CoA decarboxylase) (MMCD) (EC 4.1.1.41)                               | 307 | ECHDC1 | 0 | 1 | 0 | 0 | 4.9 | 0 |
| 1326 | 0.00 | -0.11 | 0.00 | Q9NVS9 | Pyridoxine-5'-phosphate oxidase (EC 1.4.3.5) (Pyridoxamine-phosphate oxidase)                                                                                                       | 261 | PNPO   | 0 | 1 | 0 | 0 | 6.9 | 0 |
| 1327 | 0.00 | 0.02  | 0.00 | Q9NW13 | RNA-binding protein 28 (RNA-binding motif protein 28)                                                                                                                               | 759 | RBM28  | 0 | 1 | 0 | 0 | 1.5 | 0 |
| 1328 | 0.00 | 0.55  | 0.00 | Q9NZL9 | Methionine adenosyltransferase 2 subunit beta (Methionine adenosyltransferase II beta) (MAT II beta) (Putative dTDP-4-keto-6-deoxy-D-glucose 4-reductase)                           | 334 | MAT2B  | 0 | 1 | 0 | 0 | 3.3 | 0 |
| 1329 | 0.00 | -1.44 | 0.00 | Q9P1F3 | Costars family protein ABRACL (ABRA C-terminal-like protein)                                                                                                                        | 81  | ABRACL | 0 | 1 | 0 | 0 | 16  | 0 |
| 1330 | 0.00 | 0.50  | 0.00 | Q9UDW1 | Cytochrome b-c1 complex subunit 9 (Complex III subunit 9) (Complex III subunit X) (Cytochrome c1 non-heme 7 kDa protein) (Ubiquinol-cytochrome c reductase complex 7.2 kDa protein) | 63  | UQCR10 | 0 | 1 | 0 | 0 | 27  | 0 |

|      |      |        |      |        |                                                                                                                                                                                                                                                          |      |          |   |   |   |      |      |      |
|------|------|--------|------|--------|----------------------------------------------------------------------------------------------------------------------------------------------------------------------------------------------------------------------------------------------------------|------|----------|---|---|---|------|------|------|
| 1331 | 0.00 | 0.78   | 0.00 | Q9UHA4 | Ragulator complex protein LAMTOR3 (Late endosomal/lysosomal adaptor and MAPK and MTOR activator 3) (MEK-binding partner 1) (Mp1) (Mitogen-activated protein kinase kinase 1-interacting protein 1) (Mitogen-activated protein kinase scaffold protein 1) | 124  | LAMTOR3  | 0 | 1 | 0 | 0    | 13.7 | 0    |
| 1332 | 0.00 | 7.17   | 0.00 | Q9UKX3 | Myosin-13 (Myosin heavy chain 13) (Myosin heavy chain, skeletal muscle, extraocular) (MyHC-EO) (Myosin heavy chain, skeletal muscle, laryngeal) (MyHC-IIL) (Superfast myosin)                                                                            | 1938 | MYH13    | 0 | 1 | 0 | 0    | 0.8  | 0    |
| 1333 | 0.00 | 1.24   | 0.00 | Q9Y5U9 | Immediate early response 3-interacting protein 1                                                                                                                                                                                                         | 82   | IER3IP1  | 0 | 1 | 0 | 0    | 24.4 | 0    |
| 1334 | 0.00 | 1.16   | 0.00 | R4GN18 | Membrane cofactor protein (Fragment)                                                                                                                                                                                                                     | 78   | CD46     | 0 | 1 | 0 | 0    | 16.7 | 0    |
| 1335 | 0.00 | 1.61   | 0.00 | R4GN83 | Basigin (Fragment)                                                                                                                                                                                                                                       | 52   | BSG      | 0 | 1 | 0 | 0    | 26.9 | 0    |
| 1336 | 0.00 | 0.91   | 0.00 | R4GN99 | Peptidyl-prolyl cis-trans isomerase (EC 5.2.1.8)                                                                                                                                                                                                         | 145  | PPIF     | 0 | 1 | 0 | 0    | 6.2  | 0    |
| 1337 | 0.00 | 1.15   | 0.00 | R4GNH9 | Exosome complex component CSL4                                                                                                                                                                                                                           | 139  | EXOSC1   | 0 | 1 | 0 | 0    | 11.5 | 0    |
| 1338 | 0.00 | 2.84   | 0.00 | S4R3I5 | NADH dehydrogenase (Ubiquinone) 1 alpha subcomplex, 3, 9kDa, isoform CRA_b (NADH dehydrogenase [ubiquinone] 1 alpha subcomplex subunit 3)                                                                                                                | 41   | NDUFA3   | 0 | 1 | 0 | 0    | 26.8 | 0    |
| 1339 | 0.00 | - 0.76 | 0.00 | S4R402 | Nucleolar and coiled-body phosphoprotein 1                                                                                                                                                                                                               | 46   | NOLC1    | 0 | 1 | 0 | 0    | 21.7 | 0    |
| 1340 | 0.00 | - 0.06 | 0.06 | O95670 | V-type proton ATPase subunit G 2 (V-ATPase subunit G 2) (V-ATPase 13 kDa subunit 2) (Vacuolar proton pump subunit G 2)                                                                                                                                   | 118  | ATP6V1G2 | 1 | 1 | 1 | 19.2 | 19.2 | 19.2 |
| 1341 | 0.00 | 0.03   | 0.36 | Q3BDU5 | Prelamin-A/C (Rhabdomyosarcoma antigen MU-RMS-40.12)                                                                                                                                                                                                     | 487  | LMNA     | 5 | 3 | 6 | 11.7 | 7.2  | 14   |

|      |      |       |       |        |                                                                                                                                                                                                                                    |      |           |   |   |   |      |      |      |
|------|------|-------|-------|--------|------------------------------------------------------------------------------------------------------------------------------------------------------------------------------------------------------------------------------------|------|-----------|---|---|---|------|------|------|
| 1342 | 0.00 | -0.89 | -0.30 | H0YM70 | Proteasome activator complex subunit 2                                                                                                                                                                                             | 228  | PSME2     | 4 | 3 | 4 | 28.9 | 19.3 | 28.1 |
| 1343 | 0.01 | -0.47 | 0.65  | P30046 | D-dopachrome decarboxylase (EC 4.1.1.84) (D-dopachrome tautomerase) (Phenylpyruvate tautomerase II)                                                                                                                                | 118  | DDT       | 1 | 4 | 2 | 10.2 | 35.6 | 21.2 |
| 1344 | 0.01 | 0.00  | 0.00  | O00267 | Transcription elongation factor SPT5 (hSPT5) (DRB sensitivity-inducing factor 160 kDa subunit) (DSIF p160) (DRB sensitivity-inducing factor large subunit) (DSIF large subunit) (Tat-cotransactivator 1 protein) (Tat-CT1 protein) | 1087 | SUPT5H    | 1 | 0 | 0 | 1.4  | 0    | 0    |
| 1345 | 0.01 | 0.95  | 0.88  | P19404 | NADH dehydrogenase [ubiquinone] flavoprotein 2, mitochondrial (EC 1.6.5.3) (EC 1.6.99.3) (NADH-ubiquinone oxidoreductase 24 kDa subunit)                                                                                           | 249  | NDUFV2    | 1 | 2 | 2 | 4    | 9.2  | 9.2  |
| 1346 | 0.01 | 0.22  | 0.66  | M0QZR9 | ELAV-like protein 1                                                                                                                                                                                                                | 153  | ELAVL1    | 1 | 1 | 1 | 8.5  | 8.5  | 8.5  |
| 1347 | 0.02 | 0.90  | 0.13  | P30084 | Enoyl-CoA hydratase, mitochondrial (EC 4.2.1.17) (Enoyl-CoA hydratase 1) (Short-chain enoyl-CoA hydratase) (SCEH)                                                                                                                  | 290  | ECHS1     | 1 | 5 | 2 | 6.2  | 27.6 | 9.3  |
| 1348 | 0.03 | 0.16  | -0.03 | Q00765 | Receptor expression-enhancing protein 5 (Polyposis locus protein 1) (Protein TB2)                                                                                                                                                  | 189  | REEP5     | 4 | 5 | 4 | 16.4 | 21.2 | 16.4 |
| 1349 | 0.03 | 0.25  | 1.21  | Q8N257 | Histone H2B type 3-B (H2B type 12)                                                                                                                                                                                                 | 126  | HIST3H2BB | 2 | 3 | 3 | 15.1 | 23.8 | 27   |
| 1350 | 0.03 | -0.46 | 0.10  | Q3ZCM7 | Tubulin beta-8 chain                                                                                                                                                                                                               | 444  | TUBB8     | 5 | 6 | 5 | 16   | 16.4 | 13.1 |
| 1351 | 0.03 | 0.79  | 0.10  | Q07065 | Cytoskeleton-associated protein 4 (63-kDa cytoskeleton-linking membrane protein) (Climp-63) (p63)                                                                                                                                  | 602  | CKAP4     | 6 | 2 | 8 | 11.8 | 4.3  | 15.9 |



|      |      |           |      |        |                                                                                                                                                                                                                                                                                                                                                                                                   |      |         |   |   |   |      |      |      |
|------|------|-----------|------|--------|---------------------------------------------------------------------------------------------------------------------------------------------------------------------------------------------------------------------------------------------------------------------------------------------------------------------------------------------------------------------------------------------------|------|---------|---|---|---|------|------|------|
| 1352 | 0.04 | 0.63      | 1.04 | P53007 | Tricarboxylate transport protein, mitochondrial (Citrate transport protein) (CTP) (Solute carrier family 25 member 1) (Tricarboxylate carrier protein)                                                                                                                                                                                                                                            | 311  | SLC25A1 | 2 | 2 | 2 | 7.7  | 7.4  | 7.7  |
| 1353 | 0.04 | 1.07      | 0.24 | Q5JPE7 | Nodal modulator 2 (pM5 protein 2)                                                                                                                                                                                                                                                                                                                                                                 | 1267 | NOMO2   | 1 | 3 | 1 | 0.8  | 3.2  | 0.8  |
| 1354 | 0.04 | 0.36      | 0.41 | Q6Y1H2 | Very-long-chain (3R)-3-hydroxyacyl-CoA dehydratase 2 (EC 4.2.1.134) (3-hydroxyacyl-CoA dehydratase 2) (HACD2) (Protein-tyrosine phosphatase-like member B)                                                                                                                                                                                                                                        | 254  | HACD2   | 1 | 1 | 1 | 3.9  | 3.5  | 3.9  |
| 1355 | 0.05 | -<br>0.17 | 0.24 | H0YD18 | Nucleobindin-2 (Fragment)                                                                                                                                                                                                                                                                                                                                                                         | 73   | NUCB2   | 1 | 1 | 1 | 12.3 | 12.3 | 12.3 |
| 1356 | 0.05 | 0.00      | 0.54 | P51610 | Host cell factor 1 (HCF) (HCF-1) (C1 factor) (CFF) (VCAF) (VP16 accessory protein) [Cleaved into: HCF N-terminal chain 1; HCF N-terminal chain 2; HCF N-terminal chain 3; HCF N-terminal chain 4; HCF N-terminal chain 5; HCF N-terminal chain 6; HCF C-terminal chain 1; HCF C-terminal chain 2; HCF C-terminal chain 3; HCF C-terminal chain 4; HCF C-terminal chain 5; HCF C-terminal chain 6] | 2035 | HCFC1   | 1 | 0 | 1 | 0.8  | 0    | 0.8  |
| 1357 | 0.05 | 0.25      | 0.88 | P62191 | 26S protease regulatory subunit 4 (P26s4) (26S proteasome AAA-ATPase subunit RPT2) (Proteasome 26S subunit ATPase 1)                                                                                                                                                                                                                                                                              | 440  | PSMC1   | 1 | 1 | 3 | 2.5  | 5.7  | 10.9 |
| 1358 | 0.06 | 0.00      | 0.86 | A6NKB8 | Aminopeptidase B                                                                                                                                                                                                                                                                                                                                                                                  | 611  | RNPEP   | 1 | 0 | 1 | 1.6  | 0    | 2    |
| 1359 | 0.06 | 0.50      | 0.65 | P05091 | Aldehyde dehydrogenase, mitochondrial (EC 1.2.1.3) (ALDH class 2) (ALDH-E2) (ALDHI)                                                                                                                                                                                                                                                                                                               | 517  | ALDH2   | 7 | 7 | 8 | 16.2 | 16.8 | 19.1 |
| 1360 | 0.07 | 0.00      | 0.65 | P60891 | Ribose-phosphate pyrophosphokinase 1 (EC 2.7.6.1) (PPRibP) (Phosphoribosyl pyrophosphate synthase I) (PRS-I)                                                                                                                                                                                                                                                                                      | 318  | PRPS1   | 1 | 0 | 2 | 4.1  | 0    | 7.2  |

|      |      |       |       |            |                                                                                                                                                                                                                                               |     |         |    |    |    |      |      |      |
|------|------|-------|-------|------------|-----------------------------------------------------------------------------------------------------------------------------------------------------------------------------------------------------------------------------------------------|-----|---------|----|----|----|------|------|------|
| 1361 | 0.07 | 0.10  | 1.13  | Q15005     | Signal peptidase complex subunit 2 (EC 3.4.-.-) (Microsomal signal peptidase 25 kDa subunit) (SPase 25 kDa subunit)                                                                                                                           | 226 | SPCS2   | 3  | 2  | 1  | 13.3 | 8    | 8.4  |
| 1362 | 0.08 | 0.40  | 0.52  | C9J0J7     | Profilin-2                                                                                                                                                                                                                                    | 91  | PFN2    | 1  | 2  | 1  | 8.8  | 29.7 | 8.8  |
| 1363 | 0.08 | 0.35  | 0.23  | P05141     | ADP/ATP translocase 2 (ADP,ATP carrier protein 2) (ADP,ATP carrier protein, fibroblast isoform) (Adenine nucleotide translocator 2) (ANT 2) (Solute carrier family 25 member 5) [Cleaved into: ADP/ATP translocase 2, N-terminally processed] | 298 | SLC25A5 | 7  | 7  | 8  | 21.8 | 24.2 | 24.5 |
| 1364 | 0.08 | 0.00  | -0.16 | D6REM1     | Golgi phosphoprotein 3                                                                                                                                                                                                                        | 93  | GOLPH3  | 1  | 0  | 1  | 14   | 0    | 14   |
| 1365 | 0.08 | 0.39  | 0.49  | P34897     | Serine hydroxymethyltransferase, mitochondrial (SHMT) (EC 2.1.2.1) (Glycine hydroxymethyltransferase) (Serine methylase)                                                                                                                      | 504 | SHMT2   | 3  | 1  | 8  | 8.1  | 2.3  | 21.7 |
| 1366 | 0.09 | 0.00  | 0.28  | Q9Y3I0     | tRNA-splicing ligase RtcB homolog (EC 6.5.1.3)                                                                                                                                                                                                | 505 | RTCB    | 1  | 0  | 1  | 3.2  | 0    | 3.2  |
| 1367 | 0.10 | 0.67  | 0.52  | A0A087X054 | Hypoxia up-regulated protein 1                                                                                                                                                                                                                | 937 | HYOU1   | 7  | 8  | 6  | 8    | 12.8 | 8.5  |
| 1368 | 0.10 | -0.09 | 0.33  | P38606     | V-type proton ATPase catalytic subunit A (V-ATPase subunit A) (EC 3.6.3.14) (V-ATPase 69 kDa subunit) (Vacuolar ATPase isoform VA68) (Vacuolar proton pump subunit alpha)                                                                     | 617 | ATP6V1A | 1  | 1  | 2  | 3.1  | 3.1  | 3.4  |
| 1369 | 0.10 | 0.00  | 0.00  | Q15813     | Tubulin-specific chaperone E (Tubulin-folding cofactor E)                                                                                                                                                                                     | 527 | TBCE    | 1  | 0  | 0  | 2.1  | 0    | 0    |
| 1370 | 0.10 | -0.03 | 0.44  | J3QT77     | Serum paraoxonase/arylesterase 2                                                                                                                                                                                                              | 342 | PON2    | 1  | 1  | 3  | 5.6  | 3.5  | 12.3 |
| 1371 | 0.10 | 0.03  | 0.44  | P12814     | Alpha-actinin-1 (Alpha-actinin cytoskeletal isoform) (F-actin cross-linking protein) (Non-muscle alpha-actinin-1)                                                                                                                             | 892 | ACTN1   | 13 | 20 | 13 | 20   | 27   | 20.3 |

|      |      |       |       |        |                                                                                                                                                                                                                                                                                                             |     |         |    |   |    |      |      |      |
|------|------|-------|-------|--------|-------------------------------------------------------------------------------------------------------------------------------------------------------------------------------------------------------------------------------------------------------------------------------------------------------------|-----|---------|----|---|----|------|------|------|
| 1372 | 0.10 | -0.30 | 0.18  | O43324 | Eukaryotic translation elongation factor 1 epsilon-1 (Aminoacyl tRNA synthetase complex-interacting multifunctional protein 3) (Elongation factor p18) (Multisynthase complex auxiliary component p18)                                                                                                      | 174 | EEF1E1  | 2  | 2 | 2  | 12.1 | 12.6 | 12.1 |
| 1373 | 0.11 | -0.60 | 0.30  | Q9NQ88 | Fructose-2,6-bisphosphatase TIGAR (EC 3.1.3.46) (TP53-induced glycolysis and apoptosis regulator)                                                                                                                                                                                                           | 270 | TIGAR   | 2  | 2 | 1  | 8.9  | 8.9  | 4.8  |
| 1374 | 0.11 | 0.00  | 0.83  | Q12792 | Twinfilin-1 (Protein A6) (Protein tyrosine kinase 9)                                                                                                                                                                                                                                                        | 350 | TWF1    | 1  | 0 | 2  | 2.8  | 0    | 10.3 |
| 1375 | 0.11 | -0.88 | 0.37  | Q9BY32 | Inosine triphosphate pyrophosphatase (ITPase) (Inosine triphosphatase) (EC 3.6.1.19) (Non-canonical purine NTP pyrophosphatase) (Non-standard purine NTP pyrophosphatase) (Nucleoside-triphosphate diphosphatase) (Nucleoside-triphosphate pyrophosphatase) (NTPase) (Putative oncogene protein hlc14-06-p) | 194 | ITPA    | 5  | 3 | 3  | 24.2 | 16   | 19.1 |
| 1376 | 0.11 | 1.04  | -0.03 | H0YD13 | CD44 antigen                                                                                                                                                                                                                                                                                                | 206 | CD44    | 2  | 4 | 3  | 9.2  | 22.3 | 17   |
| 1377 | 0.12 | 0.00  | 0.25  | Q15046 | Lysine--tRNA ligase (EC 6.1.1.6) (Lysyl-tRNA synthetase) (LysRS)                                                                                                                                                                                                                                            | 597 | KARS    | 4  | 0 | 3  | 6.5  | 0    | 4.2  |
| 1378 | 0.13 | -0.95 | 0.07  | P30838 | Aldehyde dehydrogenase, dimeric NADP-preferring (EC 1.2.1.5) (ALDHIII) (Aldehyde dehydrogenase 3) (Aldehyde dehydrogenase family 3 member A1)                                                                                                                                                               | 453 | ALDH3A1 | 10 | 8 | 13 | 21.4 | 21.4 | 30   |
| 1379 | 0.13 | 0.36  | -0.22 | Q9UL25 | Ras-related protein Rab-21                                                                                                                                                                                                                                                                                  | 225 | RAB21   | 2  | 2 | 1  | 12.4 | 12.4 | 7.6  |

|      |      |           |       |        |                                                                                                                                                                   |     |        |   |   |   |      |      |      |
|------|------|-----------|-------|--------|-------------------------------------------------------------------------------------------------------------------------------------------------------------------|-----|--------|---|---|---|------|------|------|
| 1380 | 0.13 | 0.00      | 0.15  | Q14232 | Translation initiation factor eIF-2B subunit alpha (eIF-2B GDP-GTP exchange factor subunit alpha)                                                                 | 305 | EIF2B1 | 2 | 0 | 2 | 6.6  | 0    | 8.2  |
| 1381 | 0.14 | -<br>1.36 | -0.14 | P15428 | 15-hydroxyprostaglandin dehydrogenase [NAD(+)] (15-PGDH) (EC 1.1.1.141) (Prostaglandin dehydrogenase 1) (Short chain dehydrogenase/reductase family 36C member 1) | 266 | HPGD   | 3 | 3 | 3 | 14.3 | 13.2 | 13.2 |
| 1382 | 0.14 | -<br>0.07 | 0.28  | P20700 | Lamin-B1                                                                                                                                                          | 586 | LMNB1  | 2 | 4 | 3 | 3.9  | 9.9  | 6    |
| 1383 | 0.14 | 0.00      | 0.00  | P49589 | Cysteine--tRNA ligase, cytoplasmic (EC 6.1.1.16) (Cysteinyl-tRNA synthetase) (CysRS)                                                                              | 748 | CARS   | 1 | 0 | 1 | 1.4  | 0    | 1.4  |
| 1384 | 0.15 | 0.00      | 0.06  | P62873 | Guanine nucleotide-binding protein G(I)/G(S)/G(T) subunit beta-1 (Transducin beta chain 1)                                                                        | 340 | GNB1   | 2 | 1 | 2 | 6.6  | 3.3  | 6.6  |
| 1385 | 0.15 | -<br>0.34 | 0.09  | O14579 | Coatamer subunit epsilon (Epsilon-coat protein) (Epsilon-COP)                                                                                                     | 308 | COPE   | 1 | 1 | 1 | 5.4  | 5.4  | 5.4  |
| 1386 | 0.16 | 1.44      | 0.25  | P51571 | Translocon-associated protein subunit delta (TRAP-delta) (Signal sequence receptor subunit delta) (SSR-delta)                                                     | 173 | SSR4   | 1 | 2 | 1 | 7.5  | 16.8 | 7.5  |
| 1387 | 0.16 | 0.83      | 0.68  | P62140 | Serine/threonine-protein phosphatase PP1-beta catalytic subunit (PP-1B) (PPP1CD) (EC 3.1.3.16) (EC 3.1.3.53)                                                      | 327 | PPP1CB | 1 | 2 | 3 | 4    | 9.5  | 13.8 |
| 1388 | 0.17 | 0.04      | 0.93  | Q9BVK6 | Transmembrane emp24 domain-containing protein 9 (GMP25) (Glycoprotein 25L2) (p24 family protein alpha-2) (p24alpha2) (p25)                                        | 235 | TMED9  | 1 | 4 | 3 | 4.7  | 12.8 | 14.9 |
| 1389 | 0.17 | -<br>0.28 | 0.00  | P36404 | ADP-ribosylation factor-like protein 2                                                                                                                            | 184 | ARL2   | 1 | 2 | 0 | 6.5  | 12   | 0    |

|      |      |       |       |        |                                                                                                                                                                             |     |         |   |   |   |      |      |      |
|------|------|-------|-------|--------|-----------------------------------------------------------------------------------------------------------------------------------------------------------------------------|-----|---------|---|---|---|------|------|------|
| 1390 | 0.18 | 0.97  | 0.52  | B4DEZ3 | NADH dehydrogenase [ubiquinone] 1 alpha subcomplex subunit 13 (cDNA FLJ57958, highly similar to NADH dehydrogenase (ubiquinone) 1 alpha subcomplex subunit 13 (EC 1.6.5.3)) | 120 | NDUFA13 | 1 | 2 | 1 | 9.2  | 20.8 | 9.2  |
| 1391 | 0.18 | 0.00  | -0.34 | H7C4M9 | Ubiquitin-conjugating enzyme E2 H (Fragment)                                                                                                                                | 62  | UBE2H   | 1 | 0 | 1 | 24.2 | 0    | 24.2 |
| 1392 | 0.18 | -0.45 | -0.11 | P18085 | ADP-ribosylation factor 4                                                                                                                                                   | 180 | ARF4    | 3 | 3 | 3 | 17.2 | 22.8 | 17.2 |
| 1393 | 0.19 | 0.45  | 0.81  | P56556 | NADH dehydrogenase [ubiquinone] 1 alpha subcomplex subunit 6 (Complex I-B14) (CI-B14) (LYR motif-containing protein 6) (NADH-ubiquinone oxidoreductase B14 subunit)         | 154 | NDUFA6  | 2 | 1 | 2 | 15.6 | 5.2  | 15.6 |
| 1394 | 0.19 | -1.06 | -0.17 | P04080 | Cystatin-B (CPI-B) (Liver thiol proteinase inhibitor) (Stefin-B)                                                                                                            | 98  | CSTB    | 2 | 1 | 2 | 21.4 | 12.2 | 21.4 |
| 1395 | 0.19 | 1.53  | 1.08  | Q9NZ45 | CDGSH iron-sulfur domain-containing protein 1 (MitoNEET)                                                                                                                    | 108 | CISD1   | 1 | 1 | 2 | 12   | 13.9 | 25.9 |
| 1396 | 0.20 | 0.51  | 0.33  | F5H6I7 | Atlastin-3                                                                                                                                                                  | 523 | ATL3    | 1 | 1 | 3 | 3.4  | 3.4  | 7.5  |
| 1397 | 0.20 | 0.00  | 0.58  | Q07973 | 1,25-dihydroxyvitamin D(3) 24-hydroxylase, mitochondrial (24-OHase) (Vitamin D(3) 24-hydroxylase) (EC 1.14.13.126) (Cytochrome P450 24A1) (Cytochrome P450-CC24)            | 514 | CYP24A1 | 1 | 0 | 1 | 3.8  | 0    | 3.8  |
| 1398 | 0.20 | -0.17 | 0.00  | P29317 | Ephrin type-A receptor 2 (EC 2.7.10.1) (Epithelial cell kinase) (Tyrosine-protein kinase receptor ECK)                                                                      | 976 | EPHA2   | 1 | 3 | 0 | 1    | 3.6  | 0    |
| 1399 | 0.20 | 1.05  | 1.02  | Q9BX68 | Histidine triad nucleotide-binding protein 2, mitochondrial (HINT-2) (EC 3.-.-.-) (HINT-3) (HIT-17kDa) (PKCI-1-related HIT protein)                                         | 163 | HINT2   | 1 | 4 | 2 | 12.3 | 41.7 | 21.5 |

|      |      |       |       |            |                                                                                                                                                                                                     |     |        |   |   |   |      |      |      |
|------|------|-------|-------|------------|-----------------------------------------------------------------------------------------------------------------------------------------------------------------------------------------------------|-----|--------|---|---|---|------|------|------|
| 1400 | 0.21 | -0.29 | 0.17  | P48444     | Coatomer subunit delta (Archain) (Delta-coat protein) (Delta-COP)                                                                                                                                   | 511 | ARCN1  | 2 | 2 | 2 | 4.1  | 4.3  | 4.1  |
| 1401 | 0.21 | -0.40 | -0.05 | P36406     | E3 ubiquitin-protein ligase TRIM23 (EC 6.3.2.-) (ADP-ribosylation factor domain-containing protein 1) (GTP-binding protein ARD-1) (RING finger protein 46) (Tripartite motif-containing protein 23) | 574 | TRIM23 | 1 | 1 | 1 | 1.8  | 1.8  | 1.8  |
| 1402 | 0.21 | -0.67 | -1.21 | Q01995     | Transgelin (22 kDa actin-binding protein) (Protein WS3-10) (Smooth muscle protein 22-alpha) (SM22-alpha)                                                                                            | 201 | TAGLN  | 1 | 2 | 1 | 6    | 9.5  | 6    |
| 1403 | 0.22 | 0.00  | -0.06 | I3L1U8     | Active breakpoint cluster region-related protein (Fragment)                                                                                                                                         | 165 | ABR    | 1 | 0 | 1 | 6.1  | 0    | 6.1  |
| 1404 | 0.22 | 0.30  | 0.81  | O00469     | Procollagen-lysine,2-oxoglutarate 5-dioxygenase 2 (EC 1.14.11.4) (Lysyl hydroxylase 2) (LH2)                                                                                                        | 737 | PLOD2  | 2 | 1 | 3 | 2.6  | 1.4  | 4.9  |
| 1405 | 0.22 | -0.71 | 0.07  | P12931     | Proto-oncogene tyrosine-protein kinase Src (EC 2.7.10.2) (Proto-oncogene c-Src) (pp60c-src) (p60-Src)                                                                                               | 536 | SRC    | 2 | 1 | 2 | 5.2  | 2.8  | 5.2  |
| 1406 | 0.23 | 0.52  | 0.53  | B0YJC4     | Vimentin (Vimentin variant 3)                                                                                                                                                                       | 431 | VIM    | 3 | 2 | 2 | 8.6  | 3.9  | 5.6  |
| 1407 | 0.23 | 0.16  | 0.18  | Q15907     | Ras-related protein Rab-11B (GTP-binding protein YPT3)                                                                                                                                              | 218 | RAB11B | 5 | 5 | 4 | 34.6 | 34.6 | 29.6 |
| 1408 | 0.23 | 0.76  | 0.30  | Q8NE86     | Calcium uniporter protein, mitochondrial (Coiled-coil domain-containing protein 109A)                                                                                                               | 351 | MCU    | 1 | 4 | 2 | 5.3  | 18.5 | 9.6  |
| 1409 | 0.23 | 0.00  | -0.11 | Q8NBU5     | ATPase family AAA domain-containing protein 1 (EC 3.6.1.3) (Thorase)                                                                                                                                | 361 | ATAD1  | 1 | 0 | 1 | 3.8  | 0    | 3.8  |
| 1410 | 0.23 | 0.00  | 0.10  | A0A087X1I3 | Succinate dehydrogenase [ubiquinone] flavoprotein subunit, mitochondrial                                                                                                                            | 519 | SDHA   | 1 | 0 | 1 | 2.5  | 0    | 2.5  |

|      |      |       |      |        |                                                                                                                                                                                 |      |         |   |   |   |      |      |      |
|------|------|-------|------|--------|---------------------------------------------------------------------------------------------------------------------------------------------------------------------------------|------|---------|---|---|---|------|------|------|
| 1411 | 0.23 | 0.00  | 1.43 | P55265 | Double-stranded RNA-specific adenosine deaminase (DRADA) (EC 3.5.4.37) (136 kDa double-stranded RNA-binding protein) (p136) (Interferon-inducible protein 4) (IFI-4) (K88DSRBP) | 1226 | ADAR    | 1 | 0 | 1 | 1.1  | 0    | 1.1  |
| 1412 | 0.24 | 1.34  | 0.47 | Q6KC79 | Nipped-B-like protein (Delangin) (SCC2 homolog)                                                                                                                                 | 2804 | NIPBL   | 1 | 1 | 1 | 0.4  | 0.5  | 0.4  |
| 1413 | 0.24 | 0.03  | 0.61 | P49748 | Very long-chain specific acyl-CoA dehydrogenase, mitochondrial (VLCAD) (EC 1.3.8.9)                                                                                             | 655  | ACADVL  | 2 | 2 | 7 | 3.2  | 3.5  | 15.3 |
| 1414 | 0.24 | 1.06  | 0.40 | Q16762 | Thiosulfate sulfurtransferase (EC 2.8.1.1) (Rhodanese)                                                                                                                          | 297  | TST     | 1 | 3 | 1 | 4    | 14.5 | 4    |
| 1415 | 0.24 | 1.08  | 1.08 | C9JT21 | Elongation factor Ts (Fragment)                                                                                                                                                 | 168  | TFSM    | 1 | 2 | 2 | 8.3  | 18.5 | 18.5 |
| 1416 | 0.24 | 0.01  | 0.76 | Q96QK1 | Vacuolar protein sorting-associated protein 35 (hVPS35) (Maternal-embryonic 3) (Vesicle protein sorting 35)                                                                     | 796  | VPS35   | 2 | 1 | 1 | 3.5  | 1.8  | 1.8  |
| 1417 | 0.24 | 0.00  | 0.85 | Q96BP3 | Peptidylprolyl isomerase domain and WD repeat-containing protein 1 (EC 5.2.1.8) (Spliceosome-associated cyclophilin)                                                            | 646  | PPWD1   | 1 | 0 | 1 | 2.4  | 0    | 2.4  |
| 1418 | 0.24 | 0.23  | 0.09 | Q9BRX8 | Redox-regulatory protein FAM213A (Peroxiredoxin-like 2 activated in M-CSF stimulated monocytes) (Protein PAMM)                                                                  | 229  | FAM213A | 3 | 3 | 4 | 13.8 | 17.4 | 20.6 |
| 1419 | 0.26 | -0.97 | 0.01 | C9JP16 | Cartilage-associated protein                                                                                                                                                    | 358  | CRTAP   | 1 | 1 | 1 | 3.1  | 3.1  | 3.1  |
| 1420 | 0.26 | -0.08 | 0.20 | P51809 | Vesicle-associated membrane protein 7 (VAMP-7) (Synaptobrevin-like protein 1) (Tetanus-insensitive VAMP) (Ti-VAMP)                                                              | 220  | VAMP7   | 1 | 1 | 1 | 5    | 6.7  | 5    |
| 1421 | 0.26 | 0.00  | 0.01 | P67936 | Tropomyosin alpha-4 chain (TM30p1) (Tropomyosin-4)                                                                                                                              | 248  | TPM4    | 3 | 2 | 6 | 14.5 | 10.9 | 31   |

|      |      |       |       |        |                                                                                                                                                                                                                                      |      |        |   |   |   |      |      |      |
|------|------|-------|-------|--------|--------------------------------------------------------------------------------------------------------------------------------------------------------------------------------------------------------------------------------------|------|--------|---|---|---|------|------|------|
| 1422 | 0.26 | -0.49 | -0.04 | Q16851 | UTP--glucose-1-phosphate uridylyltransferase (EC 2.7.7.9) (UDP-glucose pyrophosphorylase) (UDPGP) (UGPase)                                                                                                                           | 508  | UGP2   | 2 | 1 | 2 | 7.6  | 3.6  | 6.4  |
| 1423 | 0.26 | 0.07  | 0.33  | P31930 | Cytochrome b-c1 complex subunit 1, mitochondrial (Complex III subunit 1) (Core protein I) (Ubiquinol-cytochrome-c reductase complex core protein 1)                                                                                  | 480  | UQCRC1 | 1 | 3 | 2 | 2.5  | 6.2  | 6.7  |
| 1424 | 0.27 | 0.50  | 0.53  | Q15363 | Transmembrane emp24 domain-containing protein 2 (Membrane protein p24A) (p24) (p24 family protein beta-1) (p24beta1)                                                                                                                 | 201  | TMED2  | 2 | 2 | 4 | 19.9 | 14.4 | 26.4 |
| 1425 | 0.27 | 0.12  | 0.36  | Q53H82 | Beta-lactamase-like protein 2 (EC 3.-.-.)                                                                                                                                                                                            | 288  | LACTB2 | 1 | 4 | 3 | 2.8  | 16.7 | 12.2 |
| 1426 | 0.27 | -0.50 | -0.69 | P49902 | Cytosolic purine 5'-nucleotidase (EC 3.1.3.5) (Cytosolic 5'-nucleotidase II)                                                                                                                                                         | 561  | NT5C2  | 1 | 1 | 2 | 3.2  | 2.4  | 5.6  |
| 1427 | 0.28 | 0.64  | 0.43  | P26640 | Valine--tRNA ligase (EC 6.1.1.9) (Protein G7a) (Valyl-tRNA synthetase) (ValRS)                                                                                                                                                       | 1264 | VAR5   | 1 | 2 | 1 | 0.9  | 2.5  | 0.9  |
| 1428 | 0.28 | 0.61  | 0.16  | D6RAA6 | Transmembrane protein 33 (Fragment)                                                                                                                                                                                                  | 222  | TMEM33 | 1 | 1 | 2 | 4.5  | 4.5  | 9.9  |
| 1429 | 0.28 | -0.74 | 0.14  | Q06210 | Glutamine--fructose-6-phosphate aminotransferase [isomerizing] 1 (EC 2.6.1.16) (D-fructose-6-phosphate amidotransferase 1) (Glutamine:fructose-6-phosphate amidotransferase 1) (GFAT 1) (GFAT1) (Hexosephosphate aminotransferase 1) | 699  | GFPT1  | 1 | 1 | 2 | 2.1  | 2.1  | 4.1  |
| 1430 | 0.28 | 0.00  | 0.33  | P53004 | Biliverdin reductase A (BVR A) (EC 1.3.1.24) (Biliverdin-IX alpha-reductase)                                                                                                                                                         | 296  | BLVRA  | 3 | 0 | 2 | 11.5 | 0    | 6.8  |
| 1431 | 0.30 | 0.01  | 0.45  | P62330 | ADP-ribosylation factor 6                                                                                                                                                                                                            | 175  | ARF6   | 1 | 1 | 2 | 6.3  | 6.3  | 18.3 |



|      |      |           |      |        |                                                                                                                                                                                                                                   |     |         |   |   |   |      |      |      |
|------|------|-----------|------|--------|-----------------------------------------------------------------------------------------------------------------------------------------------------------------------------------------------------------------------------------|-----|---------|---|---|---|------|------|------|
| 1432 | 0.30 | 0.36      | 0.19 | Q9BUP3 | Oxidoreductase HTATIP2 (EC 1.1.1.-)<br>(30 kDa HIV-1 TAT-interacting protein) (HIV-1 TAT-interactive protein 2)                                                                                                                   | 242 | HTATIP2 | 1 | 3 | 4 | 4.1  | 12.4 | 16.1 |
| 1433 | 0.31 | 0.30      | 1.56 | D6RAT0 | 40S ribosomal protein S3a                                                                                                                                                                                                         | 227 | RPS3A   | 4 | 4 | 6 | 20.3 | 18.9 | 23.3 |
| 1434 | 0.31 | 0.00      | 0.39 | P46977 | Dolichyl-diphosphooligosaccharide--<br>protein glycosyltransferase subunit<br>STT3A (Oligosaccharyl transferase<br>subunit STT3A) (STT3-A) (EC<br>2.4.99.18) (B5) (Integral membrane<br>protein 1) (Transmembrane protein<br>TMC) | 705 | STT3A   | 1 | 0 | 1 | 1.3  | 0    | 1.3  |
| 1435 | 0.31 | 0.54      | 0.00 | E5RJZ1 | Cytochrome c oxidase subunit 7A-<br>related protein, mitochondrial                                                                                                                                                                | 79  | COX7A2L | 1 | 2 | 0 | 16.5 | 26.6 | 0    |
| 1436 | 0.32 | 0.59      | 0.87 | Q9UM22 | Mammalian endymin-related<br>protein 1 (MERP-1) (Upregulated in<br>colorectal cancer gene 1 protein)                                                                                                                              | 224 | EPDR1   | 1 | 1 | 1 | 5.5  | 5.5  | 5.5  |
| 1437 | 0.34 | 0.86      | 1.26 | B4DJ81 | NADH-ubiquinone oxidoreductase 75<br>kDa subunit, mitochondrial (cDNA<br>FLJ60586, highly similar to NADH-<br>ubiquinone oxidoreductase 75 kDa<br>subunit, mitochondrial (EC 1.6.5.3))                                            | 611 | NDUFS1  | 1 | 1 | 2 | 2.6  | 2.6  | 4.3  |
| 1438 | 0.34 | 0.48      | 0.05 | F5GX19 | Ragulator complex protein<br>LAMTOR1                                                                                                                                                                                              | 142 | LAMTOR1 | 1 | 3 | 1 | 9.2  | 26.1 | 9.2  |
| 1439 | 0.34 | 0.00      | 1.08 | M0R261 | 6-phosphogluconolactonase<br>(Fragment)                                                                                                                                                                                           | 216 | PGLS    | 1 | 0 | 3 | 5.1  | 0    | 25   |
| 1440 | 0.35 | -<br>0.04 | 0.08 | Q9NUJ1 | Mycophenolic acid acyl-glucuronide<br>esterase, mitochondrial (EC 3.1.1.93)<br>(Alpha/beta hydrolase domain-<br>containing protein 10) (Abhydrolase<br>domain-containing protein 10)                                              | 306 | ABHD10  | 1 | 2 | 2 | 8.3  | 14.1 | 12.7 |

|      |      |           |       |        |                                                                                                                                                                                                                                                                            |     |         |   |   |   |     |      |     |
|------|------|-----------|-------|--------|----------------------------------------------------------------------------------------------------------------------------------------------------------------------------------------------------------------------------------------------------------------------------|-----|---------|---|---|---|-----|------|-----|
| 1441 | 0.35 | 0.00      | 1.04  | Q12906 | Interleukin enhancer-binding factor 3 (Double-stranded RNA-binding protein 76) (DRBP76) (M-phase phosphoprotein 4) (MPP4) (Nuclear factor associated with dsRNA) (NFAR) (Nuclear factor of activated T-cells 90 kDa) (NF-AT-90) (Translational control protein 80) (TCP80) | 894 | ILF3    | 2 | 0 | 2 | 2.8 | 0    | 2.8 |
| 1442 | 0.35 | 0.16      | 0.27  | Q13011 | Delta(3,5)-Delta(2,4)-dienoyl-CoA isomerase, mitochondrial (EC 5.3.3.-)                                                                                                                                                                                                    | 328 | ECH1    | 1 | 3 | 1 | 3.4 | 12.8 | 3.4 |
| 1443 | 0.35 | 0.00      | 0.36  | E7ER27 | Peroxisomal multifunctional enzyme type 2                                                                                                                                                                                                                                  | 500 | HSD17B4 | 1 | 0 | 1 | 2.8 | 0    | 2.8 |
| 1444 | 0.36 | 0.00      | 0.00  | P10155 | 60 kDa SS-A/Ro ribonucleoprotein (60 kDa Ro protein) (60 kDa ribonucleoprotein Ro) (RoRNP) (Ro 60 kDa autoantigen) (Sjogren syndrome antigen A2) (Sjogren syndrome type A antigen) (SS-A) (TROVE domain family member 2)                                                   | 538 | TROVE2  | 1 | 0 | 0 | 2   | 0    | 0   |
| 1445 | 0.36 | 0.29      | 0.13  | Q969H8 | Myeloid-derived growth factor (MYDGF) (Interleukin-25) (IL-25) (Stromal cell-derived growth factor SF20)                                                                                                                                                                   | 173 | MYDGF   | 1 | 2 | 1 | 5.2 | 13.9 | 5.2 |
| 1446 | 0.37 | -<br>1.26 | 0.40  | B0QZ43 | Erlin-1 (Fragment)                                                                                                                                                                                                                                                         | 275 | ERLIN1  | 1 | 2 | 1 | 4.4 | 8.7  | 4.4 |
| 1447 | 0.37 | -<br>0.48 | -0.19 | P14550 | Alcohol dehydrogenase [NADP(+)] (EC 1.1.1.2) (Aldehyde reductase) (Aldo-keto reductase family 1 member A1)                                                                                                                                                                 | 325 | AKR1A1  | 2 | 2 | 2 | 7.4 | 6.8  | 7.4 |
| 1448 | 0.37 | 0.00      | 0.32  | Q16658 | Fascin (55 kDa actin-bundling protein) (Singed-like protein) (p55)                                                                                                                                                                                                         | 493 | FSCN1   | 1 | 0 | 2 | 2   | 0    | 5.3 |

|      |      |       |       |        |                                                                                                                                                                                                             |     |         |   |   |   |      |      |      |
|------|------|-------|-------|--------|-------------------------------------------------------------------------------------------------------------------------------------------------------------------------------------------------------------|-----|---------|---|---|---|------|------|------|
| 1449 | 0.37 | 0.27  | 0.45  | O75874 | Isocitrate dehydrogenase [NADP] cytoplasmic (IDH) (EC 1.1.1.42) (Cytosolic NADP-isocitrate dehydrogenase) (IDP) (NADP(+)-specific ICDH) (Oxalosuccinate decarboxylase)                                      | 414 | IDH1    | 5 | 3 | 5 | 13   | 8.2  | 14.7 |
| 1450 | 0.38 | 0.46  | 0.49  | F8W7Q4 | Protein FAM162A                                                                                                                                                                                             | 144 | FAM162A | 1 | 2 | 2 | 7.6  | 15.3 | 19.4 |
| 1451 | 0.40 | -0.20 | 0.44  | F5GYN4 | Ubiquitin thioesterase OTUB1                                                                                                                                                                                | 241 | OTUB1   | 3 | 3 | 5 | 14.5 | 17.4 | 27.4 |
| 1452 | 0.41 | 0.00  | 1.21  | P07305 | Histone H1.0 (Histone H1') (Histone H1(0)) [Cleaved into: Histone H1.0, N-terminally processed]                                                                                                             | 194 | H1F0    | 1 | 0 | 1 | 7.3  | 0    | 7.3  |
| 1453 | 0.41 | 0.00  | 1.07  | Q16795 | NADH dehydrogenase [ubiquinone] 1 alpha subcomplex subunit 9, mitochondrial (Complex I-39kD) (CI-39kD) (NADH-ubiquinone oxidoreductase 39 kDa subunit)                                                      | 377 | NDUFA9  | 1 | 0 | 2 | 2.7  | 0    | 8    |
| 1454 | 0.41 | 0.00  | -0.02 | H0Y6T7 | Nicastrin (Fragment)                                                                                                                                                                                        | 275 | NCSTN   | 2 | 0 | 1 | 7.3  | 0    | 4.4  |
| 1455 | 0.42 | 0.00  | 0.37  | G3V2G6 | Retinol dehydrogenase 11 (Fragment)                                                                                                                                                                         | 178 | RDH11   | 1 | 1 | 1 | 7.3  | 7.3  | 7.3  |
| 1456 | 0.42 | 1.99  | 1.98  | P52292 | Importin subunit alpha-1 (Karyopherin subunit alpha-2) (RAG cohort protein 1) (SRP1-alpha)                                                                                                                  | 529 | KPNA2   | 3 | 2 | 2 | 7    | 7    | 5.5  |
| 1457 | 0.42 | 0.00  | 0.00  | Q6SZW1 | Sterile alpha and TIR motif-containing protein 1 (Sterile alpha and Armadillo repeat protein) (Sterile alpha motif domain-containing protein 2) (MyD88-5) (SAM domain-containing protein 2) (Tir-1 homolog) | 724 | SARM1   | 1 | 0 | 0 | 1.6  | 0    | 0    |
| 1458 | 0.43 | 0.70  | 1.27  | Q16698 | 2,4-dienoyl-CoA reductase, mitochondrial (EC 1.3.1.34) (2,4-dienoyl-CoA reductase [NADPH]) (4-enoyl-CoA reductase [NADPH]) (Short chain dehydrogenase/reductase family 18C member 1)                        | 335 | DECR1   | 1 | 4 | 2 | 4    | 17.8 | 10.7 |

|      |      |       |       |        |                                                                                                                                                                                                 |     |         |   |   |   |      |      |      |
|------|------|-------|-------|--------|-------------------------------------------------------------------------------------------------------------------------------------------------------------------------------------------------|-----|---------|---|---|---|------|------|------|
| 1459 | 0.43 | 0.18  | -0.23 | Q56VL3 | OCIA domain-containing protein 2 (Ovarian carcinoma immunoreactive antigen-like protein)                                                                                                        | 154 | OCIAD2  | 1 | 3 | 1 | 8.4  | 21.4 | 8.4  |
| 1460 | 0.44 | 0.16  | 0.49  | O95994 | Anterior gradient protein 2 homolog (AG-2) (hAG-2) (HPC8) (Secreted cement gland protein XAG-2 homolog)                                                                                         | 175 | AGR2    | 4 | 4 | 3 | 26.3 | 36   | 33.1 |
| 1461 | 0.44 | 1.96  | 0.43  | Q9UI09 | NADH dehydrogenase [ubiquinone] 1 alpha subcomplex subunit 12 (13 kDa differentiation-associated protein) (Complex I-B17.2) (CI-B17.2) (CIB17.2) (NADH-ubiquinone oxidoreductase subunit B17.2) | 145 | NDUFA12 | 1 | 1 | 1 | 5.5  | 11.7 | 5.5  |
| 1462 | 0.44 | 0.09  | -0.09 | Q16836 | Hydroxyacyl-coenzyme A dehydrogenase, mitochondrial (HCDH) (EC 1.1.1.35) (Medium and short-chain L-3-hydroxyacyl-coenzyme A dehydrogenase) (Short-chain 3-hydroxyacyl-CoA dehydrogenase)        | 314 | HADH    | 1 | 1 | 1 | 3.2  | 3.2  | 3.2  |
| 1463 | 0.44 | -0.16 | 0.06  | P40616 | ADP-ribosylation factor-like protein 1                                                                                                                                                          | 181 | ARL1    | 1 | 2 | 1 | 5.5  | 12.2 | 5.5  |
| 1464 | 0.46 | 0.00  | -0.57 | B4DHN5 | Syntenin-1 (cDNA FLJ55055, moderately similar to Syntenin-1)                                                                                                                                    | 239 | SDCBP   | 1 | 0 | 2 | 4.6  | 0    | 8.8  |
| 1465 | 0.48 | 0.23  | 0.08  | P23434 | Glycine cleavage system H protein, mitochondrial (Lipoic acid-containing protein)                                                                                                               | 173 | GCSH    | 1 | 2 | 1 | 8.1  | 13.9 | 8.1  |
| 1466 | 0.50 | 0.54  | 0.79  | H3BPJ9 | NADH dehydrogenase [ubiquinone] 1 beta subcomplex subunit 10                                                                                                                                    | 161 | NDUFB10 | 1 | 2 | 2 | 6.2  | 14.9 | 14.3 |
| 1467 | 0.51 | 0.11  | -0.02 | P18564 | Integrin beta-6                                                                                                                                                                                 | 788 | ITGB6   | 1 | 1 | 1 | 1.3  | 1.3  | 1.3  |

|      |      |       |       |            |                                                                                                                                                                                                  |     |        |   |   |   |      |      |      |
|------|------|-------|-------|------------|--------------------------------------------------------------------------------------------------------------------------------------------------------------------------------------------------|-----|--------|---|---|---|------|------|------|
| 1468 | 0.52 | -0.60 | 0.01  | P21980     | Protein-glutamine gamma-glutamyltransferase 2 (EC 2.3.2.13) (Tissue transglutaminase) (Transglutaminase C) (TG(C)) (TGC) (TGase C) (Transglutaminase H) (TGase H) (Transglutaminase-2) (TGase-2) | 687 | TGM2   | 6 | 2 | 4 | 9.5  | 3.8  | 7.1  |
| 1469 | 0.53 | 0.00  | -0.46 | P48735     | Isocitrate dehydrogenase [NADP], mitochondrial (IDH) (EC 1.1.1.42) (ICD-M) (IDP) (NADP(+)-specific ICDH) (Oxalosuccinate decarboxylase)                                                          | 452 | IDH2   | 2 | 1 | 1 | 5    | 2.8  | 2.8  |
| 1470 | 0.54 | 0.52  | 0.77  | E9PFN5     | Glutathione S-transferase kappa 1                                                                                                                                                                | 190 | GSTK1  | 1 | 4 | 4 | 7.4  | 26.8 | 25.8 |
| 1471 | 0.55 | 0.00  | 0.44  | A0A024R7W5 | YTH domain family, member 3, isoform CRA_a (YTH domain-containing family protein 3)                                                                                                              | 534 | YTHDF3 | 1 | 0 | 1 | 2.6  | 0    | 2.6  |
| 1472 | 0.55 | 0.00  | -0.18 | D6RG15     | Twinfilin-2                                                                                                                                                                                      | 254 | TWF2   | 2 | 0 | 2 | 9.8  | 0    | 9.8  |
| 1473 | 0.55 | 0.00  | -0.30 | Q9UNH7     | Sorting nexin-6 (TRAF4-associated factor 2) [Cleaved into: Sorting nexin-6, N-terminally processed]                                                                                              | 406 | SNX6   | 1 | 0 | 1 | 3.8  | 0    | 3.8  |
| 1474 | 0.58 | 0.40  | 0.26  | P14314     | Glucosidase 2 subunit beta (80K-H protein) (Glucosidase II subunit beta) (Protein kinase C substrate 60.1 kDa protein heavy chain) (PKCSH)                                                       | 528 | PRKCSH | 2 | 2 | 3 | 4.2  | 4.4  | 6.3  |
| 1475 | 0.59 | 0.25  | -0.11 | P22307     | Non-specific lipid-transfer protein (NSL-TP) (EC 2.3.1.176) (Propanoyl-CoA C-acyltransferase) (SCP-chi) (SCPX) (Sterol carrier protein 2) (SCP-2) (Sterol carrier protein X) (SCP-X)             | 547 | SCP2   | 1 | 6 | 2 | 13.6 | 30   | 16.4 |

|      |      |       |       |        |                                                                                                                                                                                                     |      |         |   |    |   |      |      |      |
|------|------|-------|-------|--------|-----------------------------------------------------------------------------------------------------------------------------------------------------------------------------------------------------|------|---------|---|----|---|------|------|------|
| 1476 | 0.61 | 0.26  | -0.05 | Q9BW60 | Elongation of very long chain fatty acids protein 1 (EC 2.3.1.199) (3-keto acyl-CoA synthase ELOVL1) (ELOVL fatty acid elongase 1) (ELOVL FA elongase 1) (Very-long-chain 3-oxoacyl-CoA synthase 1) | 279  | ELOVL1  | 1 | 1  | 1 | 5.2  | 5.2  | 5.2  |
| 1477 | 0.61 | 0.00  | -0.23 | O43175 | D-3-phosphoglycerate dehydrogenase (3-PGDH) (EC 1.1.1.95)                                                                                                                                           | 533  | PHGDH   | 1 | 0  | 2 | 2.4  | 0    | 4.7  |
| 1478 | 0.62 | -0.22 | 0.12  | Q6YN16 | Hydroxysteroid dehydrogenase-like protein 2 (EC 1.-.-) (Short chain dehydrogenase/reductase family 13C member 1)                                                                                    | 418  | HSDL2   | 2 | 1  | 2 | 9.6  | 5.2  | 9.6  |
| 1479 | 0.64 | 3.22  | 2.05  | P14923 | Junction plakoglobin (Catenin gamma) (Desmoplakin III) (Desmoplakin-3)                                                                                                                              | 745  | JUP     | 1 | 10 | 1 | 1.3  | 15.8 | 1.6  |
| 1480 | 0.64 | -0.62 | -0.47 | G3XAM7 | Catenin (Cadherin-associated protein), alpha 1, 102kDa, isoform CRA_a (Catenin alpha-1)                                                                                                             | 841  | CTNNA1  | 4 | 3  | 4 | 6.3  | 4.9  | 6.3  |
| 1481 | 0.66 | -1.33 | -0.10 | P40261 | Nicotinamide N-methyltransferase (EC 2.1.1.1)                                                                                                                                                       | 264  | NNMT    | 3 | 3  | 4 | 17.4 | 17.4 | 17   |
| 1482 | 0.69 | -1.30 | -0.31 | M0R0M3 | Gamma-glutamylaminecyclotransferase (Fragment)                                                                                                                                                      | 26   | GGACT   | 1 | 1  | 1 | 38.5 | 38.5 | 38.5 |
| 1483 | 0.72 | 0.00  | 0.48  | H0YM76 | WD repeat-containing protein 61                                                                                                                                                                     | 48   | WDR61   | 1 | 0  | 1 | 33.3 | 0    | 33.3 |
| 1484 | 0.73 | 0.31  | -0.19 | P19367 | Hexokinase-1 (EC 2.7.1.1) (Brain form hexokinase) (Hexokinase type I) (HK I)                                                                                                                        | 917  | HK1     | 2 | 2  | 2 | 2.5  | 2.5  | 2.5  |
| 1485 | 0.75 | -1.17 | -0.78 | O00194 | Ras-related protein Rab-27B (C25KG)                                                                                                                                                                 | 218  | RAB27B  | 2 | 2  | 2 | 10.1 | 10.1 | 10.1 |
| 1486 | 0.80 | 0.33  | 0.07  | G3XAL9 | Solute carrier family 12 (Sodium/potassium/chloride transporters), member 2, isoform CRA_a (Solute carrier family 12 member 2)                                                                      | 1150 | SLC12A2 | 1 | 2  | 1 | 1.9  | 3    | 1.9  |

|      |      |       |       |        |                                                                                                                                                                                   |     |        |   |    |   |      |      |      |
|------|------|-------|-------|--------|-----------------------------------------------------------------------------------------------------------------------------------------------------------------------------------|-----|--------|---|----|---|------|------|------|
| 1487 | 0.90 | -0.83 | -0.47 | F5H3C5 | Superoxide dismutase [Mn], mitochondrial (Fragment)                                                                                                                               | 111 | SOD2   | 6 | 5  | 6 | 47.7 | 45.9 | 47.7 |
| 1488 | 0.94 | 0.00  | 0.00  | F8WAU7 | Vesicle-trafficking protein SEC22a                                                                                                                                                | 71  | SEC22A | 1 | 0  | 0 | 14.1 | 0    | 0    |
| 1489 | 0.99 | 0.00  | -0.78 | Q2TB90 | Putative hexokinase HKDC1 (EC 2.7.1.1) (Hexokinase domain-containing protein 1)                                                                                                   | 917 | HKDC1  | 1 | 1  | 2 | 1.1  | 1    | 2.1  |
| 1490 | 1.01 | -1.43 | -0.89 | Q6P452 | Annexin                                                                                                                                                                           | 299 | ANXA4  | 5 | 10 | 4 | 18.7 | 30.1 | 17.1 |
| 1491 | 1.13 | -1.82 | -0.21 | Q9BS40 | Latexin (Endogenous carboxypeptidase inhibitor) (ECI) (Protein MUM) (Tissue carboxypeptidase inhibitor) (TCI)                                                                     | 222 | LXN    | 1 | 1  | 1 | 4.1  | 4.1  | 4.1  |
| 1492 | 1.39 | 0.00  | -0.22 | O14684 | Prostaglandin E synthase (EC 5.3.99.3) (Microsomal glutathione S-transferase 1-like 1) (MGST1-L1) (Microsomal prostaglandin E synthase 1) (MPGES-1) (p53-induced gene 12 protein) | 152 | PTGES  | 1 | 0  | 1 | 6.6  | 0    | 6.6  |

**Table S2A. List of all identified phosphoproteins from SILAC experiments in CURI**

| S. No. | log2 CURI | Amino acid | Number of Phospho (STY) | Protein   | Protein names                                                                                                                                                                     | Gene names | Charge | Localization prob | PEP       | Score      | Delta score | Score for localization | Mass error [ppm] | Position | Positions within proteins | Sequence window                      |
|--------|-----------|------------|-------------------------|-----------|-----------------------------------------------------------------------------------------------------------------------------------------------------------------------------------|------------|--------|-------------------|-----------|------------|-------------|------------------------|------------------|----------|---------------------------|--------------------------------------|
| 1      | -0.19     | S          | 1                       | E7ENN3    | Nesprin-1                                                                                                                                                                         | SYNE1      | 2      | 0.90              | 0.01      | 63.18      | 63.18       | 63.18                  | -0.92            | 1916     | 1916;1896;1903;1896       | SGILRQLRQTVEATNSMNKNES<br>DLIEKDLND  |
| 2      | 6.28      | S          | 2                       | O75691    | Small subunit processome component 20 homolog                                                                                                                                     | UTP20      | 2      | 1                 | 0.01      | 72.32      | 22.13       | 72.32                  | 1.02             | 241      | 241                       | QLLFEMCKGVRNMFHSGTQGA<br>VKLILRKLGP  |
| 3      | 5.10      | S          | 2                       | Q5VY30    | Retinol-binding protein 4;Plasma retinol-binding protein(1-182);Plasma retinol-binding protein(1-181);Plasma retinol-binding protein(1-179);Plasma retinol-binding protein(1-176) | RBP4       | 2      | 1                 | 0.01      | 69.43      | 23.32       | 69.43                  | -0.14            | 194      | 194;196                   | RQYRLIVHNGYCDGRSERNLL_               |
| 4      | -2.02     | S          | 1                       | P35558    | Phosphoenolpyruvate carboxykinase, cytosolic [GTP]                                                                                                                                | PCK1       | 2      | 0.97              | 0.01      | 91.31      | 9.68        | 91.31                  | -0.97            | 286      | 286                       | TNPEGEKKYLAAAFPSACGKTN<br>LAMMNPSP   |
| 5      | -1.15     | S          | 1                       | P51858-2  | Hepatoma-derived growth factor                                                                                                                                                    | HDGF       | 2      | 1                 | 0.00<br>3 | 103.0<br>4 | 67.36       | 103.04                 | -0.83            | 158      | 158;165;181               | EKGALKRRAGDLEDSPKRPKE<br>AENPEGEEK   |
| 6      | -0.64     | S          | 1                       | Q5JR89    | Kinesin-like protein KIF2C                                                                                                                                                        | KIF2C      | 2      | 0.99              | 0.00<br>8 | 72.2       | 27.58       | 72.2                   | -1.01            | 273      | 273;241;228;282           | PLNKQELAKKEIDVISIPSKLLL<br>VHEPKL_   |
| 7      | 8.87      | S          | 2                       | Q7L513-15 |                                                                                                                                                                                   |            | 2      | 1                 | 0.02      | 75.10      | 26.55       | 74.40                  | -1.20            | 6        | 6;6;6;6;6;6               | _MLKKISVGVAGDLN<br>TVTMKLG           |
| 8      | -3.95     | S          | 1                       | Q8NOV4    | Leucine-rich repeat LGI family member 2                                                                                                                                           | LGI2       | 2      | 1                 | 0.01      | 81.27      | 10.87       | 81.27                  | -0.005           | 461      | 461                       | MRWNSKQFVEIQALPSRGAMT<br>LQPFSEKDNH  |
| 9      | -1.71     | S          | 2                       | Q8NB66    | Protein unc-13 homolog C                                                                                                                                                          | UNC13C     | 2      | 1                 | 0.00<br>2 | 104.3<br>5 | 10.26       | 104.35                 | -0.90            | 1534     | 1534                      | LTSITFFRMKVLELQSPPKASMV<br>VKDCVRAC  |
| 10     | -1.71     | S          | 2                       | Q8NB66    | Protein unc-13 homolog C                                                                                                                                                          | UNC13C     | 2      | 1                 | 0.00<br>2 | 104.3      | 10.26       | 104.35                 | -0.90            | 1539     | 1539                      | FFRMKVLELQSPPKASMVVKD<br>CVRACLDSTY  |
| 11     | 0.06      | Y          | 1                       | C9JEV4    | Tectonin beta-propeller repeat-containing protein 1                                                                                                                               | TECPR1     | 2      | 0.99              | 0.01      | 72.81      | 72.81       | 72.81                  | -0.91            | 24       | 24;24;24;24;24;24         | VDLFGRVYTLSTAGQYWEMCK<br>DSQLEFKRVS  |
| 12     | 0.05      | Y          | 1                       | D6REQ7    | Protein ZGRF1                                                                                                                                                                     | ZGRF1      | 2      | 0.84              | 0.01      | 78.50      | 41.51       | 78.50                  | -0.92            | 10       | 10;10;10;10;10;10;10      | _MESQEFIVLYTHQMKKK<br>SKVWQDGI       |
| 13     | 8.11      | Y          | 1                       | G3V500    | Echinoderm microtubule-associated protein-like 1                                                                                                                                  | EML1       | 3      | 1                 | 0.00<br>4 | 93.10      | 49.26       | 93.10                  | -0.42            | 155      | 155;173;174;186;205       | SESKPKPEPVFSAEEGYVKMFLR<br>GRPVTMYMP |
| 14     | 5.10      | Y          | 2                       | Q5VY30    | Retinol-binding protein 4;Plasma retinol-binding protein(1-182);Plasma retinol-binding protein(1-181);Plasma retinol-binding protein(1-179);Plasma retinol-binding protein(1-176) | RBP4       | 2      | 1                 | 0.01      | 69.43      | 23.32       | 69.43                  | -0.14            | 189      | 189;191                   | ELCLARQYRLIVHNGYCDGRSE<br>RNLL_      |
| 15     | 0.09      | Y          | 0                       | Q5VWW 1-3 | Complement C1q-like protein 3                                                                                                                                                     | C1QL3      | 2      | 1                 | 0.00<br>7 | 76.67      | 76.67       | 76.67                  | -2.2             | 98       | 98;116;140                | PKIAFYAGLRKQHEGYEVLKFD<br>DVVTNLGNH  |



**Table S2B. List of all identified phosphoproteins from SILAC experiments in LPSI**

| S. No. | log2 LPSI | Amino acid | Number of Phospho (STY) | Protein    | Protein names                                          | Gene names | Charge | Localization prob | PEP  | Score  | Delta score | Score for localization | Mass error [ppm] | Position | Positions within proteins                         | Sequence window                       |
|--------|-----------|------------|-------------------------|------------|--------------------------------------------------------|------------|--------|-------------------|------|--------|-------------|------------------------|------------------|----------|---------------------------------------------------|---------------------------------------|
| 1      | 0.86      | S          | 1                       | A0A0A0MRP6 | Probable global transcription activator SNF2L1         | SMARCA1    | 2      | 0.99              | 0.02 | 68.66  | 14.90       | 68.66                  | 1.17             | 420      | 420;420;420;420                                   | KSLPPKKEIKIYLGLSK<br>MQREWYTKILMKDI   |
| 2      | -0.90     | S          | 1                       | C9J8H5     | Zinc finger matrin-type protein 3                      | ZMAT3      | 3      | 1.00              | 0.03 | 53.26  | 53.26       | 53.26                  | -0.44            | 44       | 44;44;44                                          | GTLQLPPQKPFQGEASL<br>PLAGEEELSKGGEQ   |
| 3      | 8.00      | S          | 1                       | C9JZY6     | Ubiquitin-conjugating enzyme E2 H                      | UBE2H      | 2      | 1.00              | 0.01 | 66.06  | 39.27       | 66.06                  | 1.45             | 2        | 2;2;2                                             | _____MSSPSP<br>GKRRMDTDVVK            |
| 4      | -8.63     | S          | 2                       | D6RFK7     |                                                        | THAP6      | 3      | 1.00              | 0.02 | 67.42  | 63.31       | 67.42                  | -0.25            | 50       | 50                                                | PNIKLKPQVIPSIFDSPY<br>HLQKHKRKRKQEQE  |
| 5      | -8.63     | S          | 2                       | D6RFK7     |                                                        | THAP6      | 3      | 1.00              | 0.02 | 67.42  | 63.31       | 67.42                  | -0.25            | 46       | 46                                                | DRSAPNIKLLKPGVIPSIF<br>DSPYHLQKHKRKRK |
| 6      | 4.28      | S          | 1                       | E5RJ66     | Leucine-rich repeat-containing protein 69              | LRRC69     | 2      | 1.00              | 0.03 | 65.57  | 16.51       | 65.57                  | -0.27            | 31       | 31;31;31;31                                       | TKIITLNGKMKMTKMPS<br>ALGKLPGLKTLVLQN  |
| 7      | 0.78      | T          |                         | E7EPV1     | Speedy protein A                                       | SPDYA      | 2      | 1.00              | 0.01 | 96.33  | 35.30       | 96.33                  | -1.44            | 104      | 104;104;104                                       | MDCCCKIADKYLAM<br>TFVYFKRAKFTISEHT    |
| 8      | 5.86      | S          | 1                       | E9PMS6     | LIM domain only protein 7                              | LMO7       | 2      | 1.00              | 0.00 | 118.24 | 40.58       | 92.94                  | -0.17            | 1053     | 1053;1176;1176;1409;1446;1127;1176;1461;1461;1461 | NMTSSORRSKKEQVPS<br>GAELERQIQLQEMRK   |
| 9      | 5.19      | S          | 1                       | F5H0J3     |                                                        | NDUFA9     | 3      | 1.00              | 0.01 | 81.81  | 16.63       | 81.81                  | -0.98            | 9        | 9                                                 | _____MDQKAEVASQ<br>VEVVIFLKKKNQFR     |
| 10     | -9.75     | Y          | 1                       | G3V500     | Echinoderm microtubule-associated protein-like 1       | EML1       | 3      | 1.00              | 0.01 | 85.99  | 57.36       | 77.73                  | -1.09            | 155      | 155;173;174;186;205                               | SESKPKEPVFSAEEGYV<br>KMFLRGRPVMTYMP   |
| 11     | 6.01      | S          | 1                       | P28329-3   | Choline O-acetyltransferase                            | CHAT       | 3      | 0.85              | 0.01 | 91.59  | 56.49       | 81.53                  | 0.96             | 77       | 77;113;195                                        | QQKLLERQEKANWV<br>SEYWLNDMYLNRLAL     |
| 12     | 0.35      | T          | 2                       | Q05193-5   | Dynamin-1                                              | DNM1       | 2      | 1.00              | 0.01 | 96.05  | 96.05       | 96.05                  | -0.31            | 461      | 461;461;461;461                                   | LQQYPRLREEMERIVTT<br>HIREREGRTKEQVM   |
| 13     | 0.35      | T          | 2                       | Q05193-5   | Dynamin-1                                              | DNM1       | 2      | 1.00              | 0.01 | 96.05  | 96.05       | 96.05                  | -0.31            | 462      | 462;462;462;462                                   | QQYPRLREEMERIVTT<br>HIREREGRTKEQVML   |
| 14     | 0.18      | S          | 1                       | Q5JR89     | Kinesin-like protein KIF2C                             | KIF2C      | 2      | 1.00              | 0.01 | 67.39  | 30.97       | 67.39                  | -0.32            | 273      | 273;241;228;282                                   | PLNKQELAKKEIDVISIP<br>SKCLLVHEPKL_    |
| 15     | 0.41      | S          |                         | Q5T1R4-2   | Transcription factor HIVEP3                            | HIVEP3     | 2      | 0.91              | 0.02 | 68.26  | 31.22       | 68.26                  | 0.89             | 2254     | 2254;2255                                         | ERGRWSPTSSASVSP<br>VAKVSKFTLSSELE     |
| 16     | 6.50      | S          | 1                       | Q7L311     | Armadillo repeat-containing X-linked protein 2         | ARMCX2     | 3      | 1.00              | 0.02 | 58.48  | 28.44       | 58.48                  | -0.99            | 533      | 533                                               | SQGGGKIKVEILKILSN<br>FAENPDMLKLLST    |
| 17     | -2.34     | S          | 1                       | Q8ND07     | Basal body-orientation factor 1                        | CCDC176    | 3      | 1.00              | 0.02 | 82.59  | 34.65       | 82.59                  | -1.46            | 37       | 37                                                | IKTDESVDRAKANAS<br>LWEARLEVTELSRIK    |
| 18     | 6.59      | S          | 2                       | Q8NDT2-2   | Putative RNA-binding protein 15B                       | RBM15B     | 2      | 1.00              | 0.00 | 112.30 | 74.75       | 112.30                 | -0.43            | 301      | 301;628                                           | ERSRTKSGSQSERGS<br>DRTPERSRKENHSSE    |
| 19     | 6.59      | T          | 2                       | Q8NDT2-2   | Putative RNA-binding protein 15B                       | RBM15B     | 2      | 1.00              | 0.00 | 112.30 | 74.75       | 112.30                 | -0.43            | 304      | 304;631                                           | RTKSGSQSERGS<br>PERSRKENHSSEGTK       |
| 20     | 2.51      | S          | 1                       | Q96JS4     |                                                        | hucep-3    | 2      | 0.87              | 0.03 | 65.24  | 23.05       | 65.24                  | 0.75             | 93       | 93                                                | GKGMGLWGRGGMGF<br>RSICTIRKVLRSFLEG    |
| 21     | 9.57      | S          | 2                       | Q9BXJ3     | Complement C1q tumor necrosis factor-related protein 4 | C1QTNF4    | 2      | 1.00              | 0.02 | 63.18  | 63.18       | 63.18                  | 0.39             | 244      | 244                                               | YFFSFTLGKLPKRTLSV<br>KLMKNRDEVQAMIY   |

**Table S2C. List of all identified phosphoproteins from SILAC experiments in LPSCUR**

| S. No. | log <sub>2</sub> LPSCUR | Amino acid | Number of Phospho (STY) | Protein  | Protein names                                    | Gene names | Charge | Localization prob | PEP  | Score | Delta score | Score for localization | Mass error [ppm] | Position | Positions within proteins | Sequence window                 |
|--------|-------------------------|------------|-------------------------|----------|--------------------------------------------------|------------|--------|-------------------|------|-------|-------------|------------------------|------------------|----------|---------------------------|---------------------------------|
| 1      | 7.70                    | Y          | 1                       | G3V500   | Echinoderm microtubule-associated protein-like 1 | EML1       | 3      | 1.00              | 0.01 | 70.45 | 18.92       | 70.45                  | -0.94            | 155      | 155;173;174;186;205       | SESKPKPEVFSAEEGYVKMFLRGRPVTMYMP |
| 2      | 3.39                    | T          | 1                       | A6NHA9   | Olfactory receptor 4C46                          | OR4C46     | 3      | 1.00              | 0.00 | 98.18 | 49.58       | 98.18                  | -3.77            | 16       | 16                        | MENRNNMTEFVLLGLTENPKMQKIFVVFV   |
| 3      | 2.52                    | T          | 2                       | O75691   | Small subunit processome component 20 homolog    | UTP20      | 2      | 1.00              | 0.00 | 92.94 | 36.37       | 92.94                  | 0.92             | 243      | 243                       | LFEMCKGVRNMFHSCTGQAVKILRLKLPVT  |
| 4      | -0.94                   | Y          | 1                       | Q658L1-2 | Protein FAM154B                                  | FAM154B    | 2      | 1.00              | 0.01 | 79.20 | 27.13       | 79.20                  | -3.97            | 140      | 140;155                   | RSTAPFNGITSHRLDYIPHQLELKFERPKEV |

**Table S3. Number of phosphosites, charges in peptides and number of phosphogroups per peptide identified in CURI, LPSI and LPSCUR experiments.**

**Table S3A. Number of phosphosites**

| <b>Experiments</b> | <b>Serine (S)</b> | <b>Threonine (T)</b> | <b>Tyrosine (Y)</b> |
|--------------------|-------------------|----------------------|---------------------|
| <b>CURI</b>        | 15                | 0                    | 5                   |
| <b>LPSI</b>        | 19                | 6                    | 1                   |
| <b>LPSCUR</b>      | 0                 | 3                    | 2                   |

**Table S3B. Charges in peptides**

| <b>Experiments</b> | <b>Doubly charge</b> | <b>Triply charge</b> | <b>Multiply charge</b> |
|--------------------|----------------------|----------------------|------------------------|
| <b>CURI</b>        | 14                   | 1                    | 0                      |
| <b>LPSI</b>        | 13                   | 8                    | 0                      |
| <b>LPSCUR</b>      | 2                    | 2                    | 0                      |

**Table S3C. phosphogroups per peptide**

| <b>Experiments</b> | <b>Singly phosphorylated</b> | <b>Doubly phosphorylated</b> | <b>Multiply phosphorylated</b> |
|--------------------|------------------------------|------------------------------|--------------------------------|
| <b>CURI</b>        | 9                            | 6                            | 0                              |
| <b>LPSI</b>        | 14                           | 7                            | 0                              |
| <b>LPSCUR</b>      | 3                            | 1                            | 0                              |
